# Supplementary material for: Genetic Liability to Sedentary Behavior in Relation to Stroke, Its Subtypes and Neurodegenerative Diseases: A Mendelian Randomization Study
Source: PubMed Central journal article supplement (PMC8641575; doi:10.3389/fnagi.2021.757388), 2021-11-08
Supplement: Data_Sheet_1.pdf [file Data_Sheet_1.pdf]

**Supplementary Table 1. Genome-wide significant and independent single nucleotide polymorphisms that were used as instruments for television watching.**

| SNP         | chr | position  | effect_allele | other_allele | eaf  | beta   | se    | p value | F-statistics |
|-------------|-----|-----------|---------------|--------------|------|--------|-------|---------|--------------|
| rs10041724  | 5   | 124273520 | T             | C            | 0.81 | 0.018  | 0.003 | 3.9E-11 | 41.2         |
| rs10054327  | 5   | 147871137 | G             | A            | 0.58 | 0.017  | 0.002 | 3.4E-15 | 58.9         |
| rs10145592  | 14  | 94287215  | C             | G            | 0.41 | -0.015 | 0.002 | 1.8E-11 | 43.3         |
| rs10189857  | 2   | 60713235  | A             | G            | 0.57 | -0.021 | 0.002 | 6.2E-21 | 84.2         |
| rs1022785   | 14  | 29571653  | G             | A            | 0.14 | 0.018  | 0.003 | 7.1E-09 | 31.9         |
| rs10234444  | 7   | 41828527  | G             | A            | 0.82 | 0.016  | 0.003 | 2.9E-08 | 30.5         |
| rs10246289  | 7   | 115544763 | A             | G            | 0.11 | 0.019  | 0.003 | 1.7E-08 | 29.8         |
| rs1031423   | 5   | 93276883  | T             | C            | 0.22 | -0.019 | 0.003 | 1.8E-12 | 48.0         |
| rs10427502  | 21  | 40654840  | G             | A            | 0.62 | 0.014  | 0.002 | 8.6E-10 | 36.2         |
| rs10737620  | 1   | 193057971 | T             | A            | 0.27 | 0.014  | 0.002 | 2.6E-09 | 33.4         |
| rs10771746  | 12  | 30791864  | C             | T            | 0.72 | -0.014 | 0.002 | 2.5E-09 | 33.7         |
| rs10772643  | 12  | 13415288  | C             | T            | 0.11 | 0.025  | 0.004 | 1.3E-12 | 49.2         |
| rs10876864  | 12  | 56401085  | G             | A            | 0.43 | -0.013 | 0.002 | 1.0E-09 | 35.5         |
| rs10890123  | 1   | 74802123  | C             | T            | 0.77 | 0.014  | 0.003 | 3.3E-08 | 29.2         |
| rs10932837  | 2   | 221044785 | C             | T            | 0.49 | -0.013 | 0.002 | 1.3E-09 | 35.1         |
| rs10940659  | 5   | 59360341  | A             | G            | 0.53 | -0.013 | 0.002 | 1.5E-08 | 32.9         |
| rs10994943  | 10  | 63591413  | T             | G            | 0.58 | 0.013  | 0.002 | 3.1E-09 | 33.7         |
| rs11020045  | 11  | 92487907  | A             | C            | 0.67 | -0.013 | 0.002 | 1.6E-08 | 30.6         |
| rs11130793  | 3   | 60884659  | C             | T            | 0.60 | 0.013  | 0.002 | 5.0E-09 | 32.7         |
| rs111901094 | 19  | 19642795  | G             | T            | 0.82 | -0.017 | 0.003 | 2.0E-09 | 35.6         |
| rs11201422  | 10  | 86924483  | T             | C            | 0.67 | 0.013  | 0.002 | 3.4E-08 | 29.2         |
| rs11218575  | 11  | 122154576 | C             | T            | 0.57 | 0.015  | 0.002 | 2.1E-12 | 47.5         |

|             |    |           |   |   |      |        |       |         |      |
|-------------|----|-----------|---|---|------|--------|-------|---------|------|
| rs11245482  | 10 | 126733546 | T | C | 0.61 | -0.013 | 0.002 | 2.6E-09 | 33.9 |
| rs114328297 | 1  | 91190854  | T | G | 0.78 | 0.014  | 0.003 | 4.4E-08 | 29.1 |
| rs114600294 | 3  | 181419367 | G | C | 0.79 | -0.016 | 0.003 | 7.9E-10 | 35.6 |
| rs1156541   | 18 | 39952989  | C | T | 0.22 | 0.015  | 0.003 | 2.8E-08 | 29.5 |
| rs11654952  | 17 | 4813799   | T | G | 0.86 | -0.017 | 0.003 | 4.3E-08 | 29.1 |
| rs11657730  | 17 | 79372489  | C | T | 0.64 | 0.013  | 0.002 | 1.1E-08 | 31.4 |
| rs11689199  | 2  | 100820421 | A | G | 0.60 | 0.019  | 0.002 | 5.5E-17 | 67.2 |
| rs11714337  | 3  | 71582521  | G | A | 0.57 | 0.014  | 0.002 | 4.7E-11 | 41.6 |
| rs11763734  | 7  | 126400910 | A | C | 0.51 | -0.013 | 0.002 | 8.2E-09 | 31.9 |
| rs11810109  | 1  | 44186812  | A | T | 0.70 | 0.016  | 0.002 | 5.4E-12 | 45.6 |
| rs12105701  | 2  | 41737200  | C | T | 0.40 | -0.013 | 0.002 | 5.4E-09 | 32.7 |
| rs12272012  | 11 | 84861286  | G | C | 0.96 | -0.030 | 0.005 | 1.9E-08 | 27.5 |
| rs12289262  | 11 | 12894758  | C | T | 0.73 | -0.014 | 0.002 | 2.0E-08 | 30.2 |
| rs1243182   | 10 | 21916728  | C | T | 0.69 | -0.019 | 0.002 | 2.0E-15 | 60.5 |
| rs12476388  | 2  | 116330983 | C | T | 0.71 | 0.013  | 0.002 | 2.1E-08 | 29.8 |
| rs12491503  | 3  | 165706855 | G | A | 0.67 | -0.014 | 0.002 | 5.5E-10 | 37.0 |
| rs12541615  | 8  | 118870151 | T | C | 0.82 | -0.018 | 0.003 | 3.9E-10 | 37.0 |
| rs12554512  | 9  | 23352293  | T | C | 0.58 | 0.021  | 0.002 | 3.8E-21 | 85.4 |
| rs12725114  | 1  | 62432641  | G | A | 0.80 | 0.015  | 0.003 | 1.6E-08 | 30.6 |
| rs1278847   | 1  | 110037483 | C | A | 0.69 | 0.016  | 0.002 | 1.2E-11 | 44.2 |
| rs13029509  | 2  | 215374209 | G | A | 0.52 | -0.018 | 0.002 | 2.0E-17 | 68.4 |
| rs13107325  | 4  | 103188709 | C | T | 0.93 | -0.029 | 0.004 | 1.5E-12 | 45.4 |
| rs138256022 | 3  | 11603090  | C | T | 0.96 | -0.031 | 0.006 | 2.9E-08 | 30.8 |
| rs141184308 | 9  | 86463339  | A | G | 0.98 | 0.043  | 0.008 | 2.6E-08 | 30.0 |
| rs1421334   | 8  | 30865733  | A | C | 0.45 | 0.017  | 0.002 | 2.2E-15 | 60.6 |

|             |    |             |   |   |      |        |       |         |      |
|-------------|----|-------------|---|---|------|--------|-------|---------|------|
| rs142710267 | 16 | 72169262.00 | T | G | 0.65 | 0.016  | 0.002 | 1.1E-10 | 49.1 |
| rs1451533   | 2  | 105466005   | G | A | 0.72 | -0.016 | 0.002 | 6.7E-12 | 40.6 |
| rs17207890  | 11 | 95490754    | G | A | 0.66 | 0.016  | 0.002 | 1.1E-16 | 45.2 |
| rs17379561  | 1  | 98340139    | A | T | 0.86 | -0.026 | 0.003 | 7.0E-10 | 64.0 |
| rs17512836  | 18 | 53194961    | T | C | 0.97 | 0.042  | 0.007 | 3.1E-09 | 42.4 |
| rs17727474  | 10 | 127182959   | C | T | 0.83 | 0.018  | 0.003 | 1.4E-13 | 35.7 |
| rs17789218  | 6  | 100600097   | T | C | 0.76 | 0.019  | 0.003 | 8.6E-12 | 51.6 |
| rs2034768   | 3  | 93986371    | A | G | 0.49 | 0.015  | 0.002 | 5.9E-09 | 44.2 |
| rs2045147   | 10 | 56660437    | A | G | 0.45 | 0.013  | 0.002 | 1.5E-10 | 32.6 |
| rs2073869   | 9  | 135763816   | C | T | 0.83 | 0.019  | 0.003 | 1.3E-08 | 39.9 |
| rs2092829   | 22 | 31780514    | G | A | 0.71 | 0.014  | 0.002 | 1.1E-08 | 31.1 |
| rs2164744   | 12 | 109872039   | T | C | 0.64 | -0.013 | 0.002 | 4.6E-09 | 31.4 |
| rs2173650   | 12 | 117525235   | G | T | 0.85 | 0.018  | 0.003 | 3.0E-09 | 33.0 |
| rs2184364   | 6  | 143183596   | A | G | 0.78 | 0.016  | 0.003 | 6.8E-12 | 34.1 |
| rs2447098   | 17 | 2277720     | C | A | 0.48 | -0.015 | 0.002 | 5.0E-10 | 45.3 |
| rs2460      | 15 | 53073084    | G | A | 0.74 | -0.015 | 0.003 | 2.9E-10 | 36.8 |
| rs2584597   | 17 | 61941284    | T | C | 0.66 | 0.015  | 0.002 | 2.9E-14 | 41.8 |
| rs2616830   | 9  | 1721385     | G | A | 0.46 | 0.017  | 0.002 | 3.2E-15 | 55.3 |
| rs262890    | 5  | 62930015    | A | G | 0.70 | -0.019 | 0.002 | 1.5E-08 | 59.4 |
| rs2717559   | 8  | 143882420   | A | G | 0.56 | 0.012  | 0.002 | 1.2E-08 | 31.0 |
| rs2787374   | 9  | 103054951   | T | C | 0.41 | 0.013  | 0.002 | 2.7E-10 | 30.9 |
| rs303753    | 18 | 21074922    | G | A | 0.65 | -0.015 | 0.002 | 1.4E-09 | 39.1 |
| rs34864022  | 9  | 22609110    | A | G | 0.93 | -0.026 | 0.004 | 3.0E-08 | 37.1 |
| rs35574015  | 16 | 15146061    | T | C | 0.71 | -0.013 | 0.002 | 5.5E-16 | 29.3 |
| rs374722    | 2  | 147839830   | G | A | 0.15 | 0.025  | 0.003 | 4.8E-12 | 62.6 |

|            |    |           |   |   |      |        |       |         |       |
|------------|----|-----------|---|---|------|--------|-------|---------|-------|
| rs3754970  | 2  | 162091836 | T | C | 0.50 | -0.015 | 0.002 | 3.2E-33 | 46.0  |
| rs3796386  | 3  | 49899795  | G | A | 0.57 | -0.026 | 0.002 | 2.8E-09 | 137.6 |
| rs405797   | 14 | 26972834  | T | A | 0.25 | -0.015 | 0.003 | 7.3E-09 | 34.0  |
| rs42210    | 5  | 166408788 | G | C | 0.29 | -0.014 | 0.002 | 2.1E-08 | 32.5  |
| rs4334769  | 4  | 130245233 | G | T | 0.47 | 0.012  | 0.002 | 6.7E-09 | 29.8  |
| rs4382592  | 9  | 134870755 | T | G | 0.30 | 0.014  | 0.002 | 5.0E-10 | 32.2  |
| rs4523073  | 6  | 67550288  | A | G | 0.59 | -0.014 | 0.002 | 1.6E-13 | 37.7  |
| rs4577309  | 2  | 191288833 | A | G | 0.47 | 0.016  | 0.002 | 2.9E-08 | 52.1  |
| rs4675246  | 2  | 202864487 | G | T | 0.80 | -0.015 | 0.003 | 4.7E-09 | 28.7  |
| rs4775373  | 15 | 61476936  | T | C | 0.36 | 0.013  | 0.002 | 1.3E-12 | 32.8  |
| rs4845364  | 1  | 154141908 | A | G | 0.50 | -0.015 | 0.002 | 1.4E-08 | 47.9  |
| rs4937842  | 11 | 133734542 | G | C | 0.63 | -0.013 | 0.002 | 1.0E-09 | 31.2  |
| rs4973576  | 2  | 233806771 | C | A | 0.30 | -0.015 | 0.002 | 2.1E-09 | 36.1  |
| rs55700114 | 20 | 43717080  | G | A | 0.71 | -0.014 | 0.002 | 2.4E-09 | 34.4  |
| rs55909997 | 1  | 107581039 | G | A | 0.65 | -0.014 | 0.002 | 3.8E-10 | 34.4  |
| rs56103247 | 20 | 62483184  | C | T | 0.94 | 0.030  | 0.005 | 3.4E-10 | 41.0  |
| rs56858768 | 13 | 86511730  | G | A | 0.70 | -0.015 | 0.002 | 4.3E-09 | 38.1  |
| rs57585211 | 5  | 107197725 | T | G | 0.83 | -0.017 | 0.003 | 3.1E-13 | 32.2  |
| rs6131281  | 20 | 11891724  | C | T | 0.60 | 0.016  | 0.002 | 1.3E-09 | 50.9  |
| rs6141814  | 20 | 31368960  | C | A | 0.61 | -0.014 | 0.002 | 7.8E-10 | 35.5  |
| rs62379379 | 5  | 141082015 | G | T | 0.93 | -0.026 | 0.004 | 7.0E-10 | 36.0  |
| rs62641636 | 2  | 68425427  | A | G | 0.69 | 0.014  | 0.002 | 1.8E-09 | 36.3  |
| rs6472942  | 8  | 76827190  | T | C | 0.57 | -0.013 | 0.002 | 2.2E-11 | 34.9  |
| rs6673341  | 1  | 184655649 | T | G | 0.47 | -0.015 | 0.002 | 7.9E-12 | 42.8  |
| rs66852340 | 4  | 3311070   | C | T | 0.78 | -0.018 | 0.003 | 1.7E-10 | 44.5  |

|            |    |           |   |   |      |        |       |         |      |
|------------|----|-----------|---|---|------|--------|-------|---------|------|
| rs6721975  | 2  | 5832667   | T | C | 0.23 | -0.017 | 0.003 | 1.7E-13 | 40.4 |
| rs6797840  | 3  | 85656569  | A | C | 0.46 | -0.016 | 0.002 | 4.9E-15 | 52.7 |
| rs6825241  | 4  | 152543783 | C | A | 0.54 | -0.017 | 0.002 | 1.1E-10 | 58.7 |
| rs6850494  | 4  | 82291771  | A | C | 0.62 | -0.014 | 0.002 | 8.5E-18 | 39.4 |
| rs6905544  | 6  | 98411631  | A | G | 0.40 | -0.019 | 0.002 | 1.0E-09 | 70.9 |
| rs6973656  | 7  | 77422583  | A | G | 0.60 | -0.014 | 0.002 | 3.5E-08 | 35.8 |
| rs6996198  | 8  | 65463442  | C | T | 0.84 | -0.016 | 0.003 | 2.4E-09 | 29.6 |
| rs7089973  | 10 | 116569565 | C | A | 0.62 | -0.013 | 0.002 | 2.3E-08 | 34.6 |
| rs7157001  | 14 | 99749484  | A | G | 0.74 | -0.014 | 0.003 | 6.3E-10 | 30.8 |
| rs71658797 | 1  | 77967507  | T | A | 0.88 | -0.020 | 0.003 | 8.2E-13 | 35.9 |
| rs7184800  | 16 | 53509131  | G | A | 0.70 | 0.017  | 0.002 | 3.4E-11 | 48.5 |
| rs7189927  | 16 | 28913787  | T | C | 0.36 | 0.015  | 0.002 | 3.4E-10 | 42.4 |
| rs7248205  | 19 | 10770305  | C | T | 0.40 | 0.014  | 0.002 | 4.5E-08 | 37.9 |
| rs72671494 | 8  | 93195457  | T | C | 0.86 | -0.017 | 0.003 | 3.0E-12 | 29.5 |
| rs72781699 | 2  | 24277709  | G | A | 0.80 | -0.019 | 0.003 | 4.9E-09 | 45.8 |
| rs72828890 | 5  | 167806836 | C | T | 0.87 | 0.019  | 0.003 | 2.7E-13 | 34.4 |
| rs72834698 | 6  | 26176517  | G | A | 0.86 | 0.023  | 0.003 | 2.7E-12 | 50.7 |
| rs749671   | 16 | 31088347  | G | A | 0.63 | 0.016  | 0.002 | 2.8E-11 | 47.0 |
| rs7564130  | 2  | 50606642  | T | C | 0.64 | -0.015 | 0.002 | 1.7E-10 | 42.4 |
| rs7693082  | 4  | 159857819 | G | C | 0.30 | 0.015  | 0.002 | 2.7E-09 | 39.2 |
| rs7693703  | 4  | 118357405 | G | A | 0.91 | 0.023  | 0.004 | 1.9E-11 | 34.8 |
| rs7700107  | 4  | 17880416  | A | C | 0.86 | -0.021 | 0.003 | 3.6E-09 | 43.8 |
| rs7716447  | 5  | 88800331  | A | G | 0.64 | -0.013 | 0.002 | 1.5E-08 | 33.8 |
| rs77215114 | 4  | 45187658  | A | T | 0.93 | 0.024  | 0.004 | 1.1E-10 | 31.7 |
| rs7834121  | 8  | 10770311  | G | T | 0.50 | -0.014 | 0.002 | 8.8E-15 | 39.8 |

|           |    |           |   |   |      |        |       |         |      |
|-----------|----|-----------|---|---|------|--------|-------|---------|------|
| rs7991062 | 13 | 100713194 | C | G | 0.66 | -0.018 | 0.002 | 7.3E-14 | 57.5 |
| rs801733  | 11 | 65934549  | A | C | 0.64 | 0.017  | 0.002 | 3.4E-08 | 53.8 |
| rs8043253 | 15 | 41503730  | C | T | 0.57 | -0.012 | 0.002 | 5.3E-10 | 29.3 |
| rs8756    | 12 | 66359752  | C | A | 0.48 | -0.014 | 0.002 | 1.5E-09 | 37.2 |
| rs9471333 | 6  | 40362023  | C | T | 0.45 | 0.013  | 0.002 | 4.3E-11 | 34.7 |
| rs9563168 | 13 | 54247827  | G | A | 0.79 | 0.018  | 0.003 | 3.4E-10 | 42.0 |
| rs9569734 | 13 | 58319476  | A | G | 0.84 | 0.019  | 0.003 | 9.3E-19 | 39.3 |
| rs9718104 | 6  | 166170539 | T | G | 0.94 | -0.041 | 0.005 | 1.5E-08 | 76.8 |
| rs973734  | 7  | 89387578  | C | A | 0.15 | 0.017  | 0.003 | 3.3E-09 | 30.5 |
| rs9834970 | 3  | 36856030  | T | C | 0.50 | 0.013  | 0.002 | 4.1E-11 | 33.5 |
| rs984409  | 1  | 67020440  | G | A | 0.36 | -0.015 | 0.002 | 3.9E-12 | 41.8 |
| rs9867121 | 3  | 114631548 | C | A | 0.82 | 0.020  | 0.003 | 4.5E-11 | 45.9 |
| rs9902312 | 17 | 65070304  | T | C | 0.68 | 0.015  | 0.002 | 3.3E-14 | 41.7 |
| rs9964724 | 18 | 35159124  | C | T | 0.32 | 0.018  | 0.002 | 6.6E-12 | 55.1 |

SNP, single nucleotide polymorphisms; chr, chromosome; eaf, effect allele frequency; se, standard error.

**Supplementary Table 2. Genome-wide significant and independent single nucleotide polymorphisms that were used as instruments for computer use.**

| SNP         | chr | position  | effect_allele | other_allele | eaf  | beta    | se     | p value | F-statistics |
|-------------|-----|-----------|---------------|--------------|------|---------|--------|---------|--------------|
| rs10208088  | 2   | 221055873 | C             | T            | 0.42 | 0.0131  | 0.0022 | 4.4E-09 | 34.1         |
| rs10754920  | 2   | 146456888 | C             | G            | 0.11 | 0.0202  | 0.0035 | 6.7E-09 | 33.3         |
| rs113851275 | 9   | 98297220  | G             | A            | 0.89 | -0.0209 | 0.0035 | 3.2E-09 | 34.6         |
| rs11708955  | 3   | 49540114  | T             | C            | 0.69 | -0.0157 | 0.0024 | 4.2E-11 | 42.7         |
| rs11749912  | 5   | 88065628  | A             | G            | 0.42 | 0.0139  | 0.0022 | 4.9E-10 | 38.5         |
| rs12145677  | 1   | 110023610 | G             | A            | 0.70 | -0.0171 | 0.0024 | 1.2E-12 | 50.1         |
| rs12603813  | 17  | 43196584  | T             | C            | 0.75 | 0.0144  | 0.0025 | 1.3E-08 | 32.1         |
| rs12706626  | 7   | 124531370 | G             | A            | 0.62 | -0.0129 | 0.0023 | 1.4E-08 | 32.1         |
| rs13262595  | 8   | 143316970 | A             | G            | 0.44 | -0.0157 | 0.0022 | 1.2E-12 | 49.7         |
| rs136553    | 22  | 27255675  | C             | T            | 0.62 | -0.0152 | 0.0023 | 2.3E-11 | 44.3         |
| rs1448355   | 11  | 131286685 | C             | T            | 0.38 | -0.0146 | 0.0023 | 1.3E-10 | 41.1         |
| rs1469249   | 5   | 113837198 | G             | A            | 0.79 | 0.0156  | 0.0027 | 9.5E-09 | 33.2         |
| rs162894    | 5   | 131611872 | T             | G            | 0.33 | 0.0134  | 0.0023 | 1.1E-08 | 32.6         |
| rs166835    | 15  | 47716037  | C             | T            | 0.44 | 0.0131  | 0.0022 | 3.4E-09 | 34.6         |
| rs198262    | 14  | 57283283  | C             | T            | 0.04 | 0.0300  | 0.0055 | 3.9E-08 | 30.6         |
| rs2068625   | 4   | 159856739 | T             | C            | 0.30 | -0.0158 | 0.0024 | 4.0E-11 | 43.1         |
| rs206965    | 12  | 120856332 | T             | C            | 0.21 | 0.0156  | 0.0027 | 9.1E-09 | 32.6         |
| rs2220599   | 5   | 7378854   | C             | G            | 0.63 | -0.0161 | 0.0023 | 2.4E-12 | 49.2         |
| rs2345941   | 7   | 133337635 | A             | G            | 0.55 | 0.0146  | 0.0022 | 4.0E-11 | 43.1         |
| rs2734849   | 11  | 113270160 | A             | G            | 0.49 | -0.0135 | 0.0022 | 8.2E-10 | 37.2         |
| rs2748985   | 1   | 1853184   | T             | C            | 0.45 | -0.0153 | 0.0022 | 4.1E-12 | 47.5         |
| rs35933007  | 12  | 38929341  | G             | A            | 0.77 | -0.0152 | 0.0026 | 9.2E-09 | 33.3         |

|            |    |           |   |   |      |         |        |         |      |
|------------|----|-----------|---|---|------|---------|--------|---------|------|
| rs3730399  | 16 | 67229019  | A | G | 0.93 | 0.0247  | 0.0045 | 3.3E-08 | 30.4 |
| rs3944151  | 7  | 126970005 | A | G | 0.28 | 0.0137  | 0.0025 | 3.1E-08 | 30.6 |
| rs4592851  | 2  | 215364232 | G | T | 0.75 | -0.0144 | 0.0025 | 1.4E-08 | 31.8 |
| rs4702     | 15 | 91426560  | G | A | 0.44 | 0.0122  | 0.0022 | 3.8E-08 | 30.0 |
| rs4977839  | 9  | 23355310  | G | A | 0.58 | -0.0199 | 0.0022 | 4.7E-19 | 78.7 |
| rs55772938 | 7  | 70025113  | A | G | 0.70 | -0.0151 | 0.0024 | 3.9E-10 | 38.8 |
| rs6129084  | 20 | 59828857  | A | T | 0.36 | -0.0141 | 0.0023 | 9.3E-10 | 37.4 |
| rs6498759  | 16 | 18020295  | T | C | 0.31 | 0.0133  | 0.0024 | 2.7E-08 | 30.9 |
| rs66643547 | 17 | 79375315  | C | T | 0.65 | -0.0154 | 0.0023 | 3.2E-11 | 44.3 |
| rs6744254  | 2  | 155986195 | C | T | 0.47 | -0.0159 | 0.0022 | 5.4E-13 | 51.5 |
| rs6774533  | 3  | 62471086  | C | T | 0.29 | -0.0149 | 0.0025 | 1.2E-09 | 37.7 |
| rs6857629  | 4  | 39684977  | G | A | 0.76 | 0.0154  | 0.0026 | 1.9E-09 | 35.9 |
| rs6935828  | 6  | 140811367 | C | T | 0.45 | -0.0121 | 0.0022 | 4.3E-08 | 29.6 |
| rs7020477  | 9  | 116827760 | A | G | 0.73 | 0.0142  | 0.0025 | 1.2E-08 | 32.1 |
| rs7209653  | 17 | 19882084  | T | C | 0.70 | 0.0156  | 0.0024 | 9.1E-11 | 41.4 |
| rs7288455  | 22 | 39966547  | A | G | 0.44 | 0.0131  | 0.0022 | 4.0E-09 | 34.5 |
| rs73578186 | 9  | 126334485 | C | T | 0.68 | 0.0150  | 0.0024 | 2.3E-10 | 40.3 |
| rs78082503 | 3  | 116556913 | G | C | 0.79 | -0.0154 | 0.0027 | 1.1E-08 | 32.6 |
| rs784256   | 18 | 53398626  | G | A | 0.19 | 0.0185  | 0.0028 | 6.2E-11 | 42.7 |
| rs9372625  | 6  | 98344031  | G | A | 0.62 | -0.0184 | 0.0023 | 5.7E-16 | 65.3 |
| rs9477970  | 6  | 19082663  | T | A | 0.81 | -0.0160 | 0.0028 | 1.0E-08 | 32.4 |

SNP, single nucleotide polymorphisms; chr, chromosome; eaf, effect allele frequency; se, standard error.



**Supplementary Table 3. Genome-wide significant and independent single nucleotide polymorphisms that were used as instruments for driving.**

| SNP        | chr | position  | effect_allele | other_allele | eaf  | beta    | se     | <i>p</i> value | F-statistics |
|------------|-----|-----------|---------------|--------------|------|---------|--------|----------------|--------------|
| rs10186876 | 2   | 44241155  | A             | G            | 0.36 | 0.0144  | 0.0023 | 7.2E-10        | 39.1         |
| rs1198575  | 1   | 98562260  | T             | C            | 0.19 | 0.0190  | 0.0028 | 2.0E-11        | 46.0         |
| rs4765541  | 12  | 124465995 | T             | C            | 0.66 | 0.0138  | 0.0024 | 5.1E-09        | 34.7         |
| rs6012558  | 20  | 47531286  | G             | A            | 0.58 | 0.0145  | 0.0023 | 1.6E-10        | 41.9         |
| rs9840902  | 3   | 78369573  | G             | A            | 0.78 | -0.0149 | 0.0027 | 4.5E-08        | 31.0         |

SNP, single nucleotide polymorphisms; chr, chromosome; eaf, effect allele frequency; se, standard error.

**Supplementary Table 4. Data sources for the confounding traits.**

| Confounding trait                           | Consortium or GWAS | Race        | Number of cases | Number of controls |
|---------------------------------------------|--------------------|-------------|-----------------|--------------------|
| <b>Lipids</b>                               |                    |             |                 |                    |
| High-density lipoprotein cholesterol        | UKBB and GLGC [1]  | Transethnic | NA              | 188,578            |
| Low-density lipoprotein cholesterol         |                    |             |                 |                    |
| Total cholesterol                           |                    |             |                 |                    |
| Triglycerides                               |                    |             |                 |                    |
| <b>Glycaemic traits</b>                     |                    |             |                 |                    |
| Fasting glucose                             | MAGIC [2-4]        | European    | NA              | 46,186             |
| Fasting insulin                             |                    |             |                 |                    |
| HOMA-B                                      |                    |             |                 |                    |
| HOMA-IR                                     |                    |             |                 | 123,665            |
| HbA1c                                       |                    |             |                 | 30,107             |
| Modified Stumvoll insulin sensitivity index |                    |             |                 |                    |
| <b>Blood Pressure</b>                       |                    |             |                 |                    |
| Systolic blood pressure                     | UKBB and ICBP [5]  | European    | NA              | 757,601            |
| Diastolic blood pressure                    |                    |             |                 |                    |
| Pulse pressure                              |                    |             |                 |                    |
| <b>Body composition</b>                     |                    |             |                 |                    |
| Body mass index                             | GIANT [6]          | European    | NA              | 694,649            |
| Waist-to-hip ratio                          |                    |             |                 |                    |
| <b>Habits and customs</b>                   |                    |             |                 |                    |
| Smoking                                     | GSCAN [7]          | European    | NA              | 1.2 million        |
| Alcohol use                                 |                    |             |                 |                    |
| Physical activity                           | UKBB [8]           | European    | NA              | 91,105             |

GWAS, Genome-wide Association Study; UKBB, UK Biobank; NA, not available; GLGC, Global Lipids Genetics Consortium; MAGIC, Meta-Analyses of Glucose and Insulin-related traits Consortium; ICBP, International Consortium of Blood Pressure; GIANT, Genetic Investigation of ANthropometric Traits; GSCAN, GWAS and Sequencing Consortium of Alcohol and Nicotine use.

**Supplementary Table 5. Mendelian randomization association of genetically determined driving behavior with cerebrovascular disease traits and neurodegenerative disease traits.**

| Outcome                          | Driving             |                |                       |                       |                               |
|----------------------------------|---------------------|----------------|-----------------------|-----------------------|-------------------------------|
|                                  | OR/beta (95%CI)     | <i>p</i> value | <i>I</i> <sup>2</sup> | <i>P</i> <sub>Q</sub> | <i>P</i> <sub>intercept</sub> |
| Cerebrovascular disease traits   |                     |                |                       |                       |                               |
| AS                               | 1.03 (0.56, 1.89)   | 0.92           | 0                     | 0.50                  | 0.09                          |
| AIS                              | 1.24 (0.61, 2.50)   | 0.55           | 7.4                   | 0.36                  | 0.05                          |
| CES                              | 1.69 (0.48, 5.97)   | 0.42           | 0                     | 0.67                  | 0.15                          |
| LAS                              | 2.45 (0.21, 28.54)  | 0.47           | 55.5                  | 0.06                  | 0.01                          |
| SVS                              | 0.74 (0.08, 7.10)   | 0.79           | 54.9                  | 0.06                  | 0.64                          |
| ICH                              | 0.25 (0.00, 48.54)  | 0.61           | 0                     | 0.95                  | 0.92                          |
| Nonlobar ICH                     | 0.38 (0.00, 49.85)  | 0.86           | 38.5                  | 0.16                  | 0.72                          |
| Lobar ICH                        | 0.20 (0.00, 224.15) | 0.65           | 0                     | 0.68                  | 0.67                          |
| WMH                              | 0.28 (-0.59, 1.14)  | 0.53           | 0                     | 0.73                  | 0.67                          |
| Neurodegenerative disease traits |                     |                |                       |                       |                               |
| AD                               | 1.26 (0.50, 3.19)   | 0.63           | 0                     | 0.69                  | 0.43                          |
| PD                               | 0.64 (0.02, 16.68)  | 0.79           | 81.5                  | <0.001                | 0.90                          |
| MS                               | 0.29 (0.02, 4.23)   | 0.36           | 0                     | 0.97                  | 0.93                          |
| CP                               | -0.80 (-1.4, -0.19) | 0.01           | 89.1                  | <0.001                | 0.36                          |

beta, the Mendelian randomization effect of continuous variable outcome, such as white matter hyperintensity and cognitive performance. OR, odds ratio; CI, confidence interval; *P*<sub>Q</sub>, *p* value corresponding to Cochran Q test; *P*<sub>intercept</sub>, *p* value corresponding to MR-Egger intercept test; AS, all-cause stroke; AIS, all-cause ischemic stroke; CES, cardioembolic stroke; LAS, large-artery atherosclerotic stroke; SVS, small vessel stroke; ICH, intracerebral hemorrhage; WMH, white matter hyperintensity; AD, Alzheimer's disease; PD, Parkinson's disease; MS, multiple sclerosis; CP, cognitive performance.

**Supplementary Table 6. Sensitivity analyses after removal of the outlier single nucleotide polymorphisms using IVW method.**

| Exposure            | Outcome | OR (95%CI)        | <i>p</i> value | <i>I</i> <sup>2</sup> | <i>P</i> <sub>Q</sub> | <i>P</i> <sub>intercept</sub> |
|---------------------|---------|-------------------|----------------|-----------------------|-----------------------|-------------------------------|
| Television watching | AS      | 1.38 (1.21, 1.58) | 1.1E-06        | 24.9%                 | 0.01                  | 0.16                          |
| Television watching | AIS     | 1.35 (1.17, 1.55) | 3.1E-05        | 23.7%                 | 0.01                  | 0.23                          |
| Television watching | SVS     | 1.49 (1.09, 2.05) | 1.2E-02        | 22.5%                 | 0.01                  | 0.49                          |
| Television watching | PD      | 0.69 (0.53, 0.88) | 3.2E-03        | 7.9%                  | 0.24                  | 0.12                          |
| Television watching | CP      | 0.70 (0.66, 0.75) | 5.3E-24        | 68.9%                 | <0.001                | 0.27                          |
| Computer use        | CP      | 1.87 (1.67, 2.10) | 8.3E-28        | 58.5%                 | <0.001                | 0.89                          |

OR, odds ratio; CI, confidence interval; *P*<sub>Q</sub>, *p* value corresponding to Cochran Q test; *P*<sub>intercept</sub>, *p* value corresponding to MR-Egger intercept test; AS, all-cause stroke; AIS, all-cause ischemic stroke; SVS, small vessel stroke; PD, Parkinson's disease; CP, cognitive performance.

**Supplementary Table 7. Mendelian randomization association of genetically determined sedentary behaviors with blood pressure, serum lipid, glycemic, obesity and lifestyle traits.**

| Outcomes/Traits                      | Consortium | Television watching  |                | Computer use         |                | Driving             |                |
|--------------------------------------|------------|----------------------|----------------|----------------------|----------------|---------------------|----------------|
|                                      |            | beta (95%CI)         | <i>p</i> value | beta (95%CI)         | <i>p</i> value | beta (95%CI)        | <i>p</i> value |
| Systolic blood pressure              | UKBB+ICBP  | 1.54 (0.62, 2.45)    | 1.01E-03       | -3.76 (-6.09, -1.43) | 1.58E-03       | 1.16 (-5.85, 8.17)  | 0.75           |
| Diastolic blood pressure             |            | 1.04 (0.44, 1.63)    | 6.25E-04       | -1.70 (-2.94, -0.45) | 7.61E-03       | 0.60 (-3.10, 4.29)  | 0.75           |
| Pulse pressure                       |            | 0.51 (-0.02, 1.04)   | 0.06           | -2.09 (-3.42, -0.75) | 2.23E-03       | 0.65 (-3.17, 4.48)  | 0.74           |
| High-density lipoprotein cholesterol | GLGC       | -0.28 (-0.39, -0.17) | 2.72E-07       | 0.07 (-0.07, 0.21)   | 0.33           | -0.03 (-0.72, 0.66) | 0.92           |
| Low-density lipoprotein cholesterol  |            | 0.09 (-0.02, 0.21)   | 0.09           | -0.25 (-0.5, 0.00)   | 0.05           | 0.31 (-0.47, 1.08)  | 0.43           |
| Total cholesterol                    |            | 0.04 (-0.08, 0.15)   | 0.52           | -0.19 (-0.40, 0.02)  | 0.08           | 0.28 (-0.24, 0.80)  | 0.30           |
| Triglyceride                         |            | 0.21 (0.12, 0.30)    | 4.18E-06       | -0.07 (-0.26, 0.11)  | 0.44           | 0.41 (0.00, 0.83)   | 0.05           |
| Fasting glucose                      | MAGIC      | 0.11 (0.05, 0.17)    | 1.71E-04       | -0.05 (-0.18, 0.08)  | 0.43           | 0.14 (-1.05, 1.33)  | 0.81           |
| Fasting insulin                      |            | 0.13 (0.07, 0.19)    | 6.30E-05       | 0.01 (-0.08, 0.10)   | 0.76           | 0.58 (-0.16, 1.32)  | 0.13           |
| HOMA-B                               |            | 0.06 (0.01, 0.11)    | 0.02           | 0.04 (-0.05, 0.12)   | 0.42           | 0.25 (-0.08, 0.57)  | 0.13           |
| HOMA-IR                              |            | 0.15 (0.09, 0.22)    | 1.61E-06       | 0.01 (-0.09, 0.11)   | 0.82           | 0.48 (-0.19, 1.14)  | 0.16           |
| HbA1c                                |            | 0.03 (0.00, 0.05)    | 0.06           | 0.01 (-0.04, 0.07)   | 0.59           | -0.04 (-0.33, 0.24) | 0.75           |
| Insulin sensitivity index            |            | -0.93 (-2.11, 0.25)  | 0.12           | 1.26 (-0.91, 3.44)   | 0.26           | 1.65 (-5.70, 8.99)  | 0.66           |
| Body mass index                      | GIANT      | 0.39 (0.32, 0.46)    | 1.28E-26       | 0.06 (-0.07, 0.19)   | 0.35           | 0.10 (-0.47, 0.67)  | 0.73           |
| Waist-to-hip ratio                   |            | 0.27 (0.23, 0.32)    | 6.87E-30       | -0.02 (-0.13, 0.09)  | 0.71           | 0.53 (-0.41, 1.48)  | 0.27           |
| Smoking                              | GSCAN      | -0.12 (-0.17, -0.06) | 3.93E-05       | 0.00 (-0.09, 0.10)   | 0.94           | -0.20 (-0.47, 0.07) | 0.15           |
| Alcohol use                          |            | 0.05 (0.01, 0.09)    | 0.03           | -0.04 (-0.13, 0.05)  | 0.35           | -0.08 (-0.29, 0.13) | 0.44           |
| Physical activity                    | UKBB       | -0.11 (-0.16, -0.05) | 2.51E-04       | -0.18 (-0.31, -0.05) | 8.67E-03       | 0.56 (0.29, 0.84)   | 6.31E-05       |

HOMA-B, homeostatic model assessment of  $\beta$ -cell function; HOMA-IR, homeostatic model assessment of insulin resistance; UKBB, UK biobank; ICBP, International Consortium of Blood Pressure; GLGC, Global Lipids Genetics Consortium; MAGIC, Meta-Analyses of Glucose and Insulin-related traits Consortium; GIANT, Genetic Investigation of ANthropometric Traits; GSCAN, GWAS and Sequencing Consortium of Alcohol and Nicotine use; NA, not available; CI, confidence interval.

**Supplementary Table 8. Multivariable Mendelian randomization of genetically determined sedentary behaviors and cognitive performance adjusted for confounding traits.**

|                                    | Television watching  |                | Computer use      |                |
|------------------------------------|----------------------|----------------|-------------------|----------------|
|                                    | beta (95% CI)        | <i>p</i> value | beta (95% CI)     | <i>p</i> value |
| Adjusted for blood pressure traits |                      |                |                   |                |
| Systolic blood pressure            | -0.48 (-0.56, -0.40) | 3.37E-31       | 0.69 (0.54, 0.84) | 5.28E-19       |
| Diastolic blood pressure           | -0.49 (-0.57, -0.41) | 1.00E-32       | 0.66 (0.50, 0.81) | 2.93E-17       |
| Pulse pressure                     | -0.47 (-0.55, -0.39) | 6.00E-32       | 0.70 (0.55, 0.85) | 3.77E-20       |
| Adjusted for serum lipid traits    |                      |                |                   |                |
| HDL-cholesterol                    | -0.41 (-0.53, -0.29) | 2.72E-11       | 0.60 (0.41, 0.80) | 1.14E-09       |
| LDL-cholesterol                    | -0.49 (-0.61, -0.38) | 1.38E-17       | 0.61 (0.40, 0.81) | 9.49E-09       |
| Total cholesterol                  | -0.49 (-0.60, -0.38) | 3.39E-18       | 0.61 (0.41, 0.82) | 3.85E-09       |
| Triglyceride                       | -0.47 (-0.59, -0.34) | 8.94E-14       | 0.63 (0.43, 0.82) | 4.51E-10       |
| Adjusted for glycemc traits        |                      |                |                   |                |
| Fasting glucose                    | -0.47 (-0.59, -0.35) | 4.39E-14       | 0.63 (0.44, 0.83) | 2.84E-10       |
| Fasting insulin                    | -0.51 (-0.63, -0.38) | 2.01E-15       | 0.62 (0.43, 0.82) | 4.92E-10       |
| HOMA-B                             | -0.50 (-0.62, -0.38) | 6.60E-17       | 0.60 (0.40, 0.79) | 1.07E-09       |
| HOMA-IR                            | -0.49 (-0.62, -0.36) | 6.98E-14       | 0.62 (0.42, 0.81) | 3.70E-10       |
| HbA1c                              | -0.48 (-0.59, -0.37) | 1.14E-16       | 0.61 (0.43, 0.80) | 1.33E-10       |
| Insulin sensitivity index          | -0.50 (-0.61, -0.38) | 1.34E-17       | 0.62 (0.42, 0.82) | 2.10E-09       |
| Adjusted for obesity traits        |                      |                |                   |                |
| Body mass index                    | -0.43 (-0.53, -0.33) | 3.38E-17       | 0.63 (0.48, 0.77) | 1.84E-17       |
| Waist-to-hip ratio                 | -0.39 (-0.49, -0.29) | 4.58E-14       | 0.63 (0.48, 0.77) | 8.99E-18       |
| Adjusted for lifestyle traits      |                      |                |                   |                |
| Smoking                            | -0.48 (-0.56, -0.40) | 3.17E-30       | 0.63 (0.49, 0.77) | 2.37E-18       |
| Alcohol use                        | -0.46 (-0.54, -0.38) | 2.49E-31       | 0.61 (0.47, 0.75) | 1.58E-17       |
| Physical activity                  | -0.51 (-0.59, -0.43) | 2.50E-37       | 0.61 (0.46, 0.77) | 1.78E-15       |

HOMA-B, homeostatic model assessment of  $\beta$ -cell function; HOMA-IR, homeostatic model assessment of insulin resistance; HDL-cholesterol, high-density lipoprotein cholesterol; LDL-cholesterol, low-density lipoprotein cholesterol; OR, odds ratio; CI, confidence interval.

**Supplementary Table 9. Summary data for the genetic association between television watching and all-cause stroke.**

| SNP         | effect_allele | eaf.exposure | eaf.outcome | beta.exposure | se.exposure | beta.outcome | se.outcome | proxy      |
|-------------|---------------|--------------|-------------|---------------|-------------|--------------|------------|------------|
| rs10041724  | T             | 0.81         | 0.81        | 0.018         | 0.003       | 0.007        | 0.012      |            |
| rs10054327  | G             | 0.58         | 0.59        | 0.017         | 0.002       | -0.033       | 0.009      |            |
| rs10145592  | C             | 0.41         | 0.40        | -0.015        | 0.002       | -0.001       | 0.009      |            |
| rs10189857  | A             | 0.57         | 0.56        | -0.021        | 0.002       | -0.010       | 0.009      |            |
| rs1022785   | G             | 0.14         | 0.15        | 0.018         | 0.003       | 0.032        | 0.013      |            |
| rs10234444  | G             | 0.82         | 0.83        | 0.016         | 0.003       | 0.027        | 0.013      |            |
| rs10246289  | A             | 0.11         | 0.12        | 0.019         | 0.003       | 0.018        | 0.014      |            |
| rs1031423   | T             | 0.22         | 0.20        | -0.019        | 0.003       | 0.005        | 0.011      |            |
| rs10427502  | G             | 0.62         | 0.64        | 0.014         | 0.002       | -0.008       | 0.010      |            |
| rs10737620  | T             | 0.27         | 0.28        | 0.014         | 0.002       | -0.002       | 0.010      |            |
| rs10771746  | C             | 0.72         | 0.72        | -0.014        | 0.002       | 0.009        | 0.010      |            |
| rs10772643  | C             | 0.11         | 0.12        | 0.025         | 0.004       | -0.005       | 0.015      |            |
| rs10876864  | G             | 0.43         | 0.41        | -0.013        | 0.002       | -0.013       | 0.009      |            |
| rs10890123  | C             | 0.77         | 0.79        | 0.014         | 0.003       | -0.004       | 0.011      |            |
| rs10932837  | C             | 0.49         | 0.49        | -0.013        | 0.002       | 0.000        | 0.009      |            |
| rs10940659  | A             | 0.53         | 0.53        | -0.013        | 0.002       | 0.013        | 0.009      |            |
| rs10994943  | T             | 0.58         | 0.61        | 0.013         | 0.002       | 0.018        | 0.009      |            |
| rs11020045  | A             | 0.67         | 0.67        | -0.013        | 0.002       | -0.023       | 0.010      |            |
| rs11130793  | C             | 0.60         | 0.63        | 0.013         | 0.002       | 0.021        | 0.010      |            |
| rs111901094 | G             | 0.82         | 0.88        | -0.017        | 0.003       | 0.020        | 0.014      | rs57962361 |
| rs11201422  | T             | 0.67         | 0.68        | 0.013         | 0.002       | 0.004        | 0.010      |            |
| rs11218575  | C             | 0.57         | 0.58        | 0.015         | 0.002       | 0.006        | 0.010      |            |
| rs11245482  | T             | 0.61         | 0.62        | -0.013        | 0.002       | -0.018       | 0.010      |            |



|             |   |      |      |        |       |        |       |  |
|-------------|---|------|------|--------|-------|--------|-------|--|
| rs114328297 | T | 0.78 | 0.78 | 0.014  | 0.003 | -0.003 | 0.012 |  |
| rs114600294 | G | 0.79 | 0.82 | -0.016 | 0.003 | 0.030  | 0.016 |  |
| rs1156541   | C | 0.22 | 0.23 | 0.015  | 0.003 | 0.000  | 0.011 |  |
| rs11654952  | T | 0.86 | 0.86 | -0.017 | 0.003 | -0.022 | 0.014 |  |
| rs11657730  | C | 0.64 | 0.63 | 0.013  | 0.002 | -0.002 | 0.011 |  |
| rs11689199  | A | 0.60 | 0.63 | 0.019  | 0.002 | -0.002 | 0.010 |  |
| rs11714337  | G | 0.57 | 0.57 | 0.014  | 0.002 | 0.014  | 0.010 |  |
| rs11763734  | A | 0.51 | 0.52 | -0.013 | 0.002 | 0.006  | 0.009 |  |
| rs11810109  | A | 0.70 | 0.70 | 0.016  | 0.002 | 0.018  | 0.010 |  |
| rs12105701  | C | 0.40 | 0.39 | -0.013 | 0.002 | -0.004 | 0.010 |  |
| rs12272012  | G | 0.96 | 0.95 | -0.030 | 0.005 | 0.004  | 0.022 |  |
| rs12289262  | C | 0.73 | 0.75 | -0.014 | 0.002 | 0.005  | 0.011 |  |
| rs1243182   | C | 0.69 | 0.68 | -0.019 | 0.002 | 0.020  | 0.010 |  |
| rs12476388  | C | 0.71 | 0.71 | 0.013  | 0.002 | 0.005  | 0.011 |  |
| rs12491503  | G | 0.67 | 0.68 | -0.014 | 0.002 | -0.028 | 0.010 |  |
| rs12541615  | T | 0.82 | 0.81 | -0.018 | 0.003 | -0.007 | 0.012 |  |
| rs12554512  | T | 0.58 | 0.60 | 0.021  | 0.002 | 0.020  | 0.010 |  |
| rs12725114  | G | 0.80 | 0.79 | 0.015  | 0.003 | 0.008  | 0.011 |  |
| rs1278847   | C | 0.69 | 0.70 | 0.016  | 0.002 | 0.020  | 0.011 |  |
| rs13029509  | G | 0.52 | 0.52 | -0.018 | 0.002 | 0.007  | 0.009 |  |
| rs13107325  | C | 0.93 | 0.93 | -0.029 | 0.004 | 0.001  | 0.020 |  |
| rs138256022 | C | 0.96 | 0.95 | -0.031 | 0.006 | 0.011  | 0.026 |  |
| rs1421334   | A | 0.45 | 0.46 | 0.017  | 0.002 | -0.015 | 0.009 |  |
| rs1451533   | G | 0.72 | 0.72 | -0.016 | 0.002 | 0.001  | 0.010 |  |
| rs17207890  | G | 0.66 | 0.65 | 0.016  | 0.002 | 0.006  | 0.010 |  |

|            |   |      |      |        |       |        |       |  |
|------------|---|------|------|--------|-------|--------|-------|--|
| rs17379561 | A | 0.86 | 0.85 | -0.026 | 0.003 | -0.004 | 0.013 |  |
| rs17512836 | T | 0.97 | 0.97 | 0.042  | 0.007 | 0.066  | 0.031 |  |
| rs17727474 | C | 0.83 | 0.81 | 0.018  | 0.003 | 0.019  | 0.012 |  |
| rs17789218 | T | 0.76 | 0.77 | 0.019  | 0.003 | -0.015 | 0.011 |  |
| rs2034768  | A | 0.49 | 0.47 | 0.015  | 0.002 | 0.000  | 0.009 |  |
| rs2045147  | A | 0.45 | 0.46 | 0.013  | 0.002 | -0.008 | 0.009 |  |
| rs2073869  | C | 0.83 | 0.82 | 0.019  | 0.003 | -0.003 | 0.012 |  |
| rs2092829  | G | 0.71 | 0.69 | 0.014  | 0.002 | -0.017 | 0.011 |  |
| rs2164744  | T | 0.64 | 0.62 | -0.013 | 0.002 | 0.008  | 0.009 |  |
| rs2173650  | G | 0.85 | 0.84 | 0.018  | 0.003 | -0.016 | 0.013 |  |
| rs2184364  | A | 0.78 | 0.80 | 0.016  | 0.003 | -0.013 | 0.013 |  |
| rs2447098  | C | 0.48 | 0.48 | -0.015 | 0.002 | 0.001  | 0.009 |  |
| rs2460     | G | 0.74 | 0.75 | -0.015 | 0.003 | 0.008  | 0.011 |  |
| rs2584597  | T | 0.66 | 0.71 | 0.015  | 0.002 | 0.018  | 0.011 |  |
| rs2616830  | G | 0.46 | 0.45 | 0.017  | 0.002 | -0.006 | 0.009 |  |
| rs262890   | A | 0.70 | 0.70 | -0.019 | 0.002 | -0.014 | 0.010 |  |
| rs2717559  | A | 0.56 | 0.57 | 0.012  | 0.002 | -0.001 | 0.011 |  |
| rs2787374  | T | 0.41 | 0.42 | 0.013  | 0.002 | 0.019  | 0.009 |  |
| rs303753   | G | 0.65 | 0.64 | -0.015 | 0.002 | -0.036 | 0.010 |  |
| rs34864022 | A | 0.93 | 0.92 | -0.026 | 0.004 | -0.005 | 0.018 |  |
| rs35574015 | T | 0.71 | 0.70 | -0.013 | 0.002 | -0.003 | 0.010 |  |
| rs374722   | G | 0.15 | 0.16 | 0.025  | 0.003 | 0.023  | 0.013 |  |
| rs3754970  | T | 0.50 | 0.51 | -0.015 | 0.002 | 0.005  | 0.009 |  |
| rs3796386  | G | 0.57 | 0.58 | -0.026 | 0.002 | -0.024 | 0.010 |  |
| rs405797   | T | 0.25 | 0.30 | -0.015 | 0.003 | -0.011 | 0.012 |  |

|            |   |      |      |        |       |        |       |  |
|------------|---|------|------|--------|-------|--------|-------|--|
| rs42210    | G | 0.29 | 0.29 | -0.014 | 0.002 | 0.003  | 0.011 |  |
| rs4334769  | G | 0.47 | 0.48 | 0.012  | 0.002 | 0.001  | 0.009 |  |
| rs4382592  | T | 0.30 | 0.31 | 0.014  | 0.002 | 0.029  | 0.010 |  |
| rs4523073  | A | 0.59 | 0.61 | -0.014 | 0.002 | 0.001  | 0.009 |  |
| rs4577309  | A | 0.47 | 0.47 | 0.016  | 0.002 | 0.009  | 0.009 |  |
| rs4675246  | G | 0.80 | 0.80 | -0.015 | 0.003 | -0.011 | 0.012 |  |
| rs4775373  | T | 0.36 | 0.36 | 0.013  | 0.002 | 0.006  | 0.010 |  |
| rs4845364  | A | 0.50 | 0.49 | -0.015 | 0.002 | 0.013  | 0.009 |  |
| rs4937842  | G | 0.63 | 0.61 | -0.013 | 0.002 | -0.001 | 0.010 |  |
| rs4973576  | C | 0.30 | 0.30 | -0.015 | 0.002 | -0.006 | 0.010 |  |
| rs55700114 | G | 0.71 | 0.68 | -0.014 | 0.002 | -0.007 | 0.010 |  |
| rs55909997 | G | 0.65 | 0.66 | -0.014 | 0.002 | -0.003 | 0.010 |  |
| rs56103247 | C | 0.94 | 0.95 | 0.030  | 0.005 | 0.038  | 0.024 |  |
| rs56858768 | G | 0.70 | 0.70 | -0.015 | 0.002 | -0.009 | 0.010 |  |
| rs57585211 | T | 0.83 | 0.83 | -0.017 | 0.003 | -0.022 | 0.012 |  |
| rs6131281  | C | 0.60 | 0.60 | 0.016  | 0.002 | -0.008 | 0.010 |  |
| rs6141814  | C | 0.61 | 0.63 | -0.014 | 0.002 | 0.001  | 0.009 |  |
| rs62379379 | G | 0.93 | 0.92 | -0.026 | 0.004 | -0.023 | 0.018 |  |
| rs62641636 | A | 0.69 | 0.70 | 0.014  | 0.002 | 0.008  | 0.010 |  |
| rs6472942  | T | 0.57 | 0.57 | -0.013 | 0.002 | -0.012 | 0.009 |  |
| rs6673341  | T | 0.47 | 0.47 | -0.015 | 0.002 | -0.003 | 0.009 |  |
| rs66852340 | C | 0.78 | 0.78 | -0.018 | 0.003 | -0.018 | 0.012 |  |
| rs6721975  | T | 0.23 | 0.28 | -0.017 | 0.003 | -0.037 | 0.012 |  |
| rs6797840  | A | 0.46 | 0.46 | -0.016 | 0.002 | -0.002 | 0.010 |  |
| rs6825241  | C | 0.54 | 0.55 | -0.017 | 0.002 | -0.022 | 0.010 |  |

|            |   |      |      |        |       |        |       |           |
|------------|---|------|------|--------|-------|--------|-------|-----------|
| rs6850494  | A | 0.62 | 0.60 | -0.014 | 0.002 | -0.002 | 0.010 |           |
| rs6905544  | A | 0.40 | 0.40 | -0.019 | 0.002 | -0.007 | 0.009 |           |
| rs6973656  | A | 0.60 | 0.61 | -0.014 | 0.002 | -0.012 | 0.009 |           |
| rs6996198  | C | 0.84 | 0.84 | -0.016 | 0.003 | -0.024 | 0.013 |           |
| rs7089973  | C | 0.62 | 0.63 | -0.013 | 0.002 | 0.011  | 0.010 |           |
| rs7157001  | A | 0.74 | 0.73 | -0.014 | 0.003 | -0.007 | 0.012 |           |
| rs71658797 | T | 0.88 | 0.89 | -0.020 | 0.003 | -0.025 | 0.015 |           |
| rs7184800  | G | 0.70 | 0.69 | 0.017  | 0.002 | 0.007  | 0.010 |           |
| rs7189927  | T | 0.36 | 0.35 | 0.015  | 0.002 | -0.004 | 0.010 |           |
| rs7248205  | C | 0.40 | 0.40 | 0.014  | 0.002 | -0.042 | 0.010 |           |
| rs72671494 | T | 0.86 | 0.86 | -0.017 | 0.003 | -0.002 | 0.014 |           |
| rs72781699 | G | 0.80 | 0.80 | -0.019 | 0.003 | -0.001 | 0.011 |           |
| rs72828890 | C | 0.87 | 0.87 | 0.019  | 0.003 | 0.002  | 0.015 |           |
| rs72834698 | G | 0.86 | 0.86 | 0.023  | 0.003 | 0.009  | 0.014 |           |
| rs749671   | G | 0.63 | 0.61 | 0.016  | 0.002 | -0.015 | 0.010 |           |
| rs7564130  | T | 0.64 | 0.63 | -0.015 | 0.002 | -0.012 | 0.010 |           |
| rs7693082  | G | 0.30 | 0.30 | 0.015  | 0.002 | 0.005  | 0.010 |           |
| rs7693703  | G | 0.91 | 0.90 | 0.023  | 0.004 | 0.015  | 0.016 |           |
| rs7700107  | A | 0.86 | 0.87 | -0.021 | 0.003 | -0.032 | 0.014 |           |
| rs7716447  | A | 0.64 | 0.71 | -0.013 | 0.002 | 0.003  | 0.012 |           |
| rs77215114 | A | 0.93 | 0.92 | 0.024  | 0.004 | 0.045  | 0.019 |           |
| rs7834121  | G | 0.50 | 0.51 | -0.014 | 0.002 | 0.016  | 0.009 | rs7843666 |
| rs7991062  | C | 0.66 | 0.65 | -0.018 | 0.002 | -0.010 | 0.010 |           |
| rs801733   | A | 0.64 | 0.65 | 0.017  | 0.002 | -0.001 | 0.010 |           |
| rs8043253  | C | 0.57 | 0.57 | -0.012 | 0.002 | -0.010 | 0.009 |           |

|           |   |      |      |        |       |        |       |  |
|-----------|---|------|------|--------|-------|--------|-------|--|
| rs8756    | C | 0.48 | 0.49 | -0.014 | 0.002 | -0.011 | 0.010 |  |
| rs9471333 | C | 0.45 | 0.44 | 0.013  | 0.002 | -0.001 | 0.009 |  |
| rs9563168 | G | 0.79 | 0.79 | 0.018  | 0.003 | 0.020  | 0.011 |  |
| rs9569734 | A | 0.84 | 0.86 | 0.019  | 0.003 | -0.003 | 0.014 |  |
| rs9718104 | T | 0.94 | 0.94 | -0.041 | 0.005 | -0.031 | 0.023 |  |
| rs973734  | C | 0.15 | 0.15 | 0.017  | 0.003 | 0.005  | 0.013 |  |
| rs9834970 | T | 0.50 | 0.50 | 0.013  | 0.002 | 0.000  | 0.010 |  |
| rs984409  | G | 0.36 | 0.36 | -0.015 | 0.002 | -0.007 | 0.009 |  |
| rs9867121 | C | 0.82 | 0.82 | 0.020  | 0.003 | -0.004 | 0.012 |  |
| rs9902312 | T | 0.68 | 0.67 | 0.015  | 0.002 | 0.008  | 0.010 |  |
| rs9964724 | C | 0.32 | 0.32 | 0.018  | 0.002 | -0.005 | 0.010 |  |

**Supplementary Table 10. Summary data for the genetic association between television watching and all-cause ischemic stroke.**

| SNP         | effect_allele | eaf.exposure | eaf.outcome | beta.exposure | se.exposure | beta.outcome | se.outcome | proxy      |
|-------------|---------------|--------------|-------------|---------------|-------------|--------------|------------|------------|
| rs10041724  | T             | 0.81         | 0.81        | 0.018         | 0.003       | -0.001       | 0.013      |            |
| rs10054327  | G             | 0.58         | 0.59        | 0.017         | 0.002       | -0.035       | 0.010      |            |
| rs10145592  | C             | 0.41         | 0.40        | -0.015        | 0.002       | 0.005        | 0.010      |            |
| rs10189857  | A             | 0.57         | 0.56        | -0.021        | 0.002       | -0.008       | 0.010      |            |
| rs1022785   | G             | 0.14         | 0.15        | 0.018         | 0.003       | 0.038        | 0.014      |            |
| rs10234444  | G             | 0.82         | 0.83        | 0.016         | 0.003       | 0.025        | 0.014      |            |
| rs10246289  | A             | 0.11         | 0.12        | 0.019         | 0.003       | 0.020        | 0.016      |            |
| rs1031423   | T             | 0.22         | 0.20        | -0.019        | 0.003       | 0.006        | 0.013      |            |
| rs10427502  | G             | 0.62         | 0.64        | 0.014         | 0.002       | -0.003       | 0.010      |            |
| rs10737620  | T             | 0.27         | 0.28        | 0.014         | 0.002       | -0.009       | 0.011      |            |
| rs10771746  | C             | 0.72         | 0.71        | -0.014        | 0.002       | 0.015        | 0.011      |            |
| rs10772643  | C             | 0.11         | 0.12        | 0.025         | 0.004       | -0.007       | 0.016      |            |
| rs10876864  | G             | 0.43         | 0.41        | -0.013        | 0.002       | -0.008       | 0.010      |            |
| rs10890123  | C             | 0.77         | 0.79        | 0.014         | 0.003       | -0.008       | 0.012      |            |
| rs10932837  | C             | 0.49         | 0.49        | -0.013        | 0.002       | -0.003       | 0.010      |            |
| rs10940659  | A             | 0.53         | 0.53        | -0.013        | 0.002       | 0.008        | 0.010      |            |
| rs10994943  | T             | 0.58         | 0.61        | 0.013         | 0.002       | 0.022        | 0.010      |            |
| rs11020045  | A             | 0.67         | 0.67        | -0.013        | 0.002       | -0.025       | 0.011      |            |
| rs11130793  | C             | 0.60         | 0.63        | 0.013         | 0.002       | 0.019        | 0.011      |            |
| rs111901094 | G             | 0.82         | 0.88        | -0.017        | 0.003       | 0.031        | 0.014      | rs57962361 |
| rs11201422  | T             | 0.67         | 0.68        | 0.013         | 0.002       | 0.009        | 0.011      |            |
| rs11218575  | C             | 0.57         | 0.59        | 0.015         | 0.002       | 0.009        | 0.010      |            |
| rs11245482  | T             | 0.61         | 0.62        | -0.013        | 0.002       | -0.013       | 0.010      |            |

|             |   |      |      |        |       |        |       |  |
|-------------|---|------|------|--------|-------|--------|-------|--|
| rs114328297 | T | 0.78 | 0.78 | 0.014  | 0.003 | 0.001  | 0.013 |  |
| rs114600294 | G | 0.79 | 0.82 | -0.016 | 0.003 | 0.028  | 0.016 |  |
| rs1156541   | C | 0.22 | 0.23 | 0.015  | 0.003 | -0.005 | 0.012 |  |
| rs11654952  | T | 0.86 | 0.86 | -0.017 | 0.003 | -0.021 | 0.014 |  |
| rs11657730  | C | 0.64 | 0.63 | 0.013  | 0.002 | 0.003  | 0.012 |  |
| rs11689199  | A | 0.60 | 0.63 | 0.019  | 0.002 | -0.003 | 0.010 |  |
| rs11714337  | G | 0.57 | 0.57 | 0.014  | 0.002 | 0.014  | 0.010 |  |
| rs11763734  | A | 0.51 | 0.52 | -0.013 | 0.002 | 0.004  | 0.010 |  |
| rs11810109  | A | 0.70 | 0.70 | 0.016  | 0.002 | 0.014  | 0.011 |  |
| rs12105701  | C | 0.40 | 0.39 | -0.013 | 0.002 | -0.003 | 0.011 |  |
| rs12272012  | G | 0.96 | 0.95 | -0.030 | 0.005 | 0.011  | 0.025 |  |
| rs12289262  | C | 0.73 | 0.75 | -0.014 | 0.002 | 0.007  | 0.012 |  |
| rs1243182   | C | 0.69 | 0.68 | -0.019 | 0.002 | 0.030  | 0.012 |  |
| rs12476388  | C | 0.71 | 0.71 | 0.013  | 0.002 | 0.006  | 0.011 |  |
| rs12491503  | G | 0.67 | 0.68 | -0.014 | 0.002 | -0.019 | 0.011 |  |
| rs12541615  | T | 0.82 | 0.81 | -0.018 | 0.003 | -0.008 | 0.013 |  |
| rs12554512  | T | 0.58 | 0.60 | 0.021  | 0.002 | 0.018  | 0.010 |  |
| rs12725114  | G | 0.80 | 0.79 | 0.015  | 0.003 | 0.016  | 0.013 |  |
| rs1278847   | C | 0.69 | 0.71 | 0.016  | 0.002 | 0.017  | 0.012 |  |
| rs13029509  | G | 0.52 | 0.52 | -0.018 | 0.002 | -0.001 | 0.010 |  |
| rs13107325  | C | 0.93 | 0.93 | -0.029 | 0.004 | 0.007  | 0.022 |  |
| rs138256022 | C | 0.96 | 0.95 | -0.031 | 0.006 | 0.009  | 0.029 |  |
| rs1421334   | A | 0.45 | 0.46 | 0.017  | 0.002 | -0.011 | 0.010 |  |
| rs1451533   | G | 0.72 | 0.72 | -0.016 | 0.002 | -0.001 | 0.012 |  |
| rs17207890  | G | 0.66 | 0.65 | 0.016  | 0.002 | 0.015  | 0.011 |  |

|            |   |      |      |        |       |        |       |  |
|------------|---|------|------|--------|-------|--------|-------|--|
| rs17379561 | A | 0.86 | 0.85 | -0.026 | 0.003 | -0.001 | 0.014 |  |
| rs17512836 | T | 0.97 | 0.97 | 0.042  | 0.007 | 0.044  | 0.033 |  |
| rs17727474 | C | 0.83 | 0.81 | 0.018  | 0.003 | 0.019  | 0.013 |  |
| rs17789218 | T | 0.76 | 0.77 | 0.019  | 0.003 | -0.015 | 0.013 |  |
| rs2034768  | A | 0.49 | 0.47 | 0.015  | 0.002 | -0.004 | 0.010 |  |
| rs2045147  | A | 0.45 | 0.46 | 0.013  | 0.002 | -0.006 | 0.010 |  |
| rs2073869  | C | 0.83 | 0.82 | 0.019  | 0.003 | -0.009 | 0.013 |  |
| rs2092829  | G | 0.71 | 0.69 | 0.014  | 0.002 | -0.019 | 0.011 |  |
| rs2164744  | T | 0.64 | 0.63 | -0.013 | 0.002 | 0.004  | 0.010 |  |
| rs2173650  | G | 0.85 | 0.84 | 0.018  | 0.003 | -0.024 | 0.014 |  |
| rs2184364  | A | 0.78 | 0.80 | 0.016  | 0.003 | -0.016 | 0.014 |  |
| rs2447098  | C | 0.48 | 0.48 | -0.015 | 0.002 | 0.005  | 0.010 |  |
| rs2460     | G | 0.74 | 0.75 | -0.015 | 0.003 | 0.015  | 0.012 |  |
| rs2584597  | T | 0.66 | 0.72 | 0.015  | 0.002 | 0.020  | 0.013 |  |
| rs2616830  | G | 0.46 | 0.45 | 0.017  | 0.002 | -0.005 | 0.010 |  |
| rs262890   | A | 0.70 | 0.70 | -0.019 | 0.002 | -0.016 | 0.011 |  |
| rs2717559  | A | 0.56 | 0.57 | 0.012  | 0.002 | -0.010 | 0.011 |  |
| rs2787374  | T | 0.41 | 0.41 | 0.013  | 0.002 | 0.018  | 0.010 |  |
| rs303753   | G | 0.65 | 0.64 | -0.015 | 0.002 | -0.034 | 0.011 |  |
| rs34864022 | A | 0.93 | 0.92 | -0.026 | 0.004 | -0.014 | 0.019 |  |
| rs35574015 | T | 0.71 | 0.70 | -0.013 | 0.002 | -0.001 | 0.011 |  |
| rs374722   | G | 0.15 | 0.16 | 0.025  | 0.003 | 0.025  | 0.014 |  |
| rs3754970  | T | 0.50 | 0.51 | -0.015 | 0.002 | 0.001  | 0.010 |  |
| rs3796386  | G | 0.57 | 0.58 | -0.026 | 0.002 | -0.022 | 0.011 |  |
| rs405797   | T | 0.25 | 0.30 | -0.015 | 0.003 | -0.019 | 0.013 |  |



|            |   |      |      |        |       |        |       |  |
|------------|---|------|------|--------|-------|--------|-------|--|
| rs42210    | G | 0.29 | 0.29 | -0.014 | 0.002 | 0.006  | 0.012 |  |
| rs4334769  | G | 0.47 | 0.48 | 0.012  | 0.002 | 0.002  | 0.010 |  |
| rs4382592  | T | 0.30 | 0.31 | 0.014  | 0.002 | 0.028  | 0.011 |  |
| rs4523073  | A | 0.59 | 0.61 | -0.014 | 0.002 | -0.005 | 0.010 |  |
| rs4577309  | A | 0.47 | 0.47 | 0.016  | 0.002 | 0.014  | 0.010 |  |
| rs4675246  | G | 0.80 | 0.80 | -0.015 | 0.003 | -0.015 | 0.013 |  |
| rs4775373  | T | 0.36 | 0.36 | 0.013  | 0.002 | 0.009  | 0.010 |  |
| rs4845364  | A | 0.50 | 0.49 | -0.015 | 0.002 | 0.016  | 0.010 |  |
| rs4937842  | G | 0.63 | 0.61 | -0.013 | 0.002 | 0.006  | 0.011 |  |
| rs4973576  | C | 0.30 | 0.30 | -0.015 | 0.002 | -0.004 | 0.011 |  |
| rs55700114 | G | 0.71 | 0.68 | -0.014 | 0.002 | 0.002  | 0.011 |  |
| rs55909997 | G | 0.65 | 0.66 | -0.014 | 0.002 | -0.003 | 0.011 |  |
| rs56103247 | C | 0.94 | 0.95 | 0.030  | 0.005 | 0.031  | 0.026 |  |
| rs56858768 | G | 0.70 | 0.70 | -0.015 | 0.002 | -0.006 | 0.011 |  |
| rs57585211 | T | 0.83 | 0.83 | -0.017 | 0.003 | -0.027 | 0.014 |  |
| rs6131281  | C | 0.60 | 0.60 | 0.016  | 0.002 | -0.014 | 0.010 |  |
| rs6141814  | C | 0.61 | 0.63 | -0.014 | 0.002 | 0.004  | 0.010 |  |
| rs62379379 | G | 0.93 | 0.92 | -0.026 | 0.004 | -0.018 | 0.019 |  |
| rs62641636 | A | 0.69 | 0.70 | 0.014  | 0.002 | 0.011  | 0.011 |  |
| rs6472942  | T | 0.57 | 0.57 | -0.013 | 0.002 | -0.018 | 0.010 |  |
| rs6673341  | T | 0.47 | 0.47 | -0.015 | 0.002 | -0.006 | 0.010 |  |
| rs66852340 | C | 0.78 | 0.78 | -0.018 | 0.003 | -0.015 | 0.013 |  |
| rs6721975  | T | 0.23 | 0.28 | -0.017 | 0.003 | -0.030 | 0.013 |  |
| rs6797840  | A | 0.46 | 0.46 | -0.016 | 0.002 | 0.000  | 0.010 |  |
| rs6825241  | C | 0.54 | 0.54 | -0.017 | 0.002 | -0.023 | 0.010 |  |

|            |   |      |      |        |       |        |       |           |
|------------|---|------|------|--------|-------|--------|-------|-----------|
| rs6850494  | A | 0.62 | 0.60 | -0.014 | 0.002 | -0.003 | 0.010 |           |
| rs6905544  | A | 0.40 | 0.40 | -0.019 | 0.002 | -0.008 | 0.010 |           |
| rs6973656  | A | 0.60 | 0.61 | -0.014 | 0.002 | -0.013 | 0.010 |           |
| rs6996198  | C | 0.84 | 0.84 | -0.016 | 0.003 | -0.027 | 0.014 |           |
| rs7089973  | C | 0.62 | 0.63 | -0.013 | 0.002 | 0.014  | 0.010 |           |
| rs7157001  | A | 0.74 | 0.73 | -0.014 | 0.003 | -0.009 | 0.013 |           |
| rs71658797 | T | 0.88 | 0.89 | -0.020 | 0.003 | -0.025 | 0.016 |           |
| rs7184800  | G | 0.70 | 0.69 | 0.017  | 0.002 | 0.003  | 0.011 |           |
| rs7189927  | T | 0.36 | 0.36 | 0.015  | 0.002 | 0.002  | 0.011 |           |
| rs7248205  | C | 0.40 | 0.40 | 0.014  | 0.002 | -0.044 | 0.011 |           |
| rs72671494 | T | 0.86 | 0.86 | -0.017 | 0.003 | -0.008 | 0.015 |           |
| rs72781699 | G | 0.80 | 0.80 | -0.019 | 0.003 | -0.007 | 0.012 |           |
| rs72828890 | C | 0.87 | 0.87 | 0.019  | 0.003 | -0.008 | 0.016 |           |
| rs72834698 | G | 0.86 | 0.86 | 0.023  | 0.003 | 0.001  | 0.015 |           |
| rs749671   | G | 0.63 | 0.61 | 0.016  | 0.002 | -0.015 | 0.011 |           |
| rs7564130  | T | 0.64 | 0.63 | -0.015 | 0.002 | -0.004 | 0.012 |           |
| rs7693082  | G | 0.30 | 0.30 | 0.015  | 0.002 | 0.004  | 0.011 |           |
| rs7693703  | G | 0.91 | 0.90 | 0.023  | 0.004 | 0.022  | 0.018 |           |
| rs7700107  | A | 0.86 | 0.87 | -0.021 | 0.003 | -0.028 | 0.015 |           |
| rs7716447  | A | 0.64 | 0.71 | -0.013 | 0.002 | 0.007  | 0.013 |           |
| rs77215114 | A | 0.93 | 0.92 | 0.024  | 0.004 | 0.036  | 0.021 |           |
| rs7834121  | G | 0.50 | 0.51 | -0.014 | 0.002 | 0.020  | 0.009 | rs7843666 |
| rs7991062  | C | 0.66 | 0.65 | -0.018 | 0.002 | -0.010 | 0.011 |           |
| rs801733   | A | 0.64 | 0.65 | 0.017  | 0.002 | 0.007  | 0.011 |           |
| rs8043253  | C | 0.57 | 0.57 | -0.012 | 0.002 | -0.016 | 0.010 |           |

|           |   |      |      |        |       |        |       |  |
|-----------|---|------|------|--------|-------|--------|-------|--|
| rs8756    | C | 0.48 | 0.49 | -0.014 | 0.002 | -0.013 | 0.010 |  |
| rs9471333 | C | 0.45 | 0.44 | 0.013  | 0.002 | -0.007 | 0.010 |  |
| rs9563168 | G | 0.79 | 0.79 | 0.018  | 0.003 | 0.017  | 0.012 |  |
| rs9569734 | A | 0.84 | 0.86 | 0.019  | 0.003 | -0.004 | 0.015 |  |
| rs9718104 | T | 0.94 | 0.94 | -0.041 | 0.005 | -0.047 | 0.025 |  |
| rs973734  | C | 0.15 | 0.15 | 0.017  | 0.003 | 0.010  | 0.014 |  |
| rs9834970 | T | 0.50 | 0.51 | 0.013  | 0.002 | -0.004 | 0.010 |  |
| rs984409  | G | 0.36 | 0.36 | -0.015 | 0.002 | -0.011 | 0.011 |  |
| rs9867121 | C | 0.82 | 0.81 | 0.020  | 0.003 | -0.001 | 0.014 |  |
| rs9902312 | T | 0.68 | 0.67 | 0.015  | 0.002 | 0.008  | 0.010 |  |
| rs9964724 | C | 0.32 | 0.32 | 0.018  | 0.002 | -0.006 | 0.011 |  |

**Supplementary Table 11. Summary data for the genetic association between television watching and small vessel stroke.**

| SNP         | effect_allele | eaf.exposure | eaf.outcome | beta.exposure | se.exposure | beta.outcome | se.outcome | proxy      |
|-------------|---------------|--------------|-------------|---------------|-------------|--------------|------------|------------|
| rs10041724  | T             | 0.81         | 0.81        | 0.018         | 0.003       | -0.024       | 0.030      |            |
| rs10054327  | G             | 0.58         | 0.58        | 0.017         | 0.002       | -0.049       | 0.023      |            |
| rs10145592  | C             | 0.41         | 0.40        | -0.015        | 0.002       | 0.027        | 0.023      |            |
| rs10189857  | A             | 0.57         | 0.56        | -0.021        | 0.002       | -0.049       | 0.023      |            |
| rs1022785   | G             | 0.14         | 0.15        | 0.018         | 0.003       | 0.055        | 0.033      |            |
| rs10234444  | G             | 0.82         | 0.83        | 0.016         | 0.003       | 0.043        | 0.031      |            |
| rs10246289  | A             | 0.11         | 0.12        | 0.019         | 0.003       | 0.024        | 0.036      |            |
| rs1031423   | T             | 0.22         | 0.21        | -0.019        | 0.003       | -0.001       | 0.029      |            |
| rs10427502  | G             | 0.62         | 0.63        | 0.014         | 0.002       | -0.005       | 0.024      |            |
| rs10737620  | T             | 0.27         | 0.28        | 0.014         | 0.002       | 0.002        | 0.026      |            |
| rs10771746  | C             | 0.72         | 0.72        | -0.014        | 0.002       | 0.050        | 0.026      |            |
| rs10772643  | C             | 0.11         | 0.11        | 0.025         | 0.004       | -0.041       | 0.038      |            |
| rs10876864  | G             | 0.43         | 0.42        | -0.013        | 0.002       | -0.013       | 0.023      |            |
| rs10890123  | C             | 0.77         | 0.78        | 0.014         | 0.003       | -0.011       | 0.028      |            |
| rs10932837  | C             | 0.49         | 0.49        | -0.013        | 0.002       | 0.032        | 0.023      |            |
| rs10940659  | A             | 0.53         | 0.53        | -0.013        | 0.002       | 0.028        | 0.023      |            |
| rs10994943  | T             | 0.58         | 0.61        | 0.013         | 0.002       | 0.042        | 0.024      |            |
| rs11020045  | A             | 0.67         | 0.67        | -0.013        | 0.002       | 0.009        | 0.024      |            |
| rs11130793  | C             | 0.60         | 0.62        | 0.013         | 0.002       | 0.016        | 0.024      |            |
| rs111901094 | G             | 0.82         | 0.88        | -0.017        | 0.003       | -0.002       | 0.014      | rs57962361 |
| rs11201422  | T             | 0.67         | 0.68        | 0.013         | 0.002       | -0.001       | 0.025      |            |
| rs11218575  | C             | 0.57         | 0.58        | 0.015         | 0.002       | 0.001        | 0.024      |            |
| rs11245482  | T             | 0.61         | 0.62        | -0.013        | 0.002       | -0.042       | 0.023      |            |

|             |   |      |      |        |       |        |       |  |
|-------------|---|------|------|--------|-------|--------|-------|--|
| rs114328297 | T | 0.78 | 0.79 | 0.014  | 0.003 | 0.020  | 0.030 |  |
| rs114600294 | G | 0.79 | 0.82 | -0.016 | 0.003 | 0.020  | 0.036 |  |
| rs1156541   | C | 0.22 | 0.23 | 0.015  | 0.003 | -0.003 | 0.028 |  |
| rs11654952  | T | 0.86 | 0.86 | -0.017 | 0.003 | -0.054 | 0.035 |  |
| rs11657730  | C | 0.64 | 0.64 | 0.013  | 0.002 | 0.061  | 0.027 |  |
| rs11689199  | A | 0.60 | 0.64 | 0.019  | 0.002 | 0.015  | 0.025 |  |
| rs11714337  | G | 0.57 | 0.57 | 0.014  | 0.002 | 0.008  | 0.024 |  |
| rs11763734  | A | 0.51 | 0.52 | -0.013 | 0.002 | 0.007  | 0.023 |  |
| rs11810109  | A | 0.70 | 0.70 | 0.016  | 0.002 | 0.019  | 0.025 |  |
| rs12105701  | C | 0.40 | 0.39 | -0.013 | 0.002 | -0.008 | 0.024 |  |
| rs12272012  | G | 0.96 | 0.95 | -0.030 | 0.005 | -0.056 | 0.058 |  |
| rs12289262  | C | 0.73 | 0.75 | -0.014 | 0.002 | 0.011  | 0.027 |  |
| rs1243182   | C | 0.69 | 0.68 | -0.019 | 0.002 | 0.050  | 0.025 |  |
| rs12476388  | C | 0.71 | 0.71 | 0.013  | 0.002 | 0.044  | 0.026 |  |
| rs12491503  | G | 0.67 | 0.68 | -0.014 | 0.002 | -0.020 | 0.025 |  |
| rs12541615  | T | 0.82 | 0.81 | -0.018 | 0.003 | 0.006  | 0.029 |  |
| rs12554512  | T | 0.58 | 0.60 | 0.021  | 0.002 | 0.031  | 0.024 |  |
| rs12725114  | G | 0.80 | 0.79 | 0.015  | 0.003 | 0.003  | 0.028 |  |
| rs1278847   | C | 0.69 | 0.72 | 0.016  | 0.002 | 0.033  | 0.027 |  |
| rs13029509  | G | 0.52 | 0.52 | -0.018 | 0.002 | 0.015  | 0.023 |  |
| rs13107325  | C | 0.93 | 0.92 | -0.029 | 0.004 | -0.023 | 0.048 |  |
| rs138256022 | C | 0.96 | 0.95 | -0.031 | 0.006 | 0.021  | 0.066 |  |
| rs1421334   | A | 0.45 | 0.46 | 0.017  | 0.002 | 0.043  | 0.024 |  |
| rs1451533   | G | 0.72 | 0.73 | -0.016 | 0.002 | 0.004  | 0.027 |  |
| rs17207890  | G | 0.66 | 0.65 | 0.016  | 0.002 | -0.045 | 0.024 |  |

|            |   |      |      |        |       |        |       |  |
|------------|---|------|------|--------|-------|--------|-------|--|
| rs17379561 | A | 0.86 | 0.85 | -0.026 | 0.003 | -0.006 | 0.032 |  |
| rs17512836 | T | 0.97 | 0.97 | 0.042  | 0.007 | 0.022  | 0.077 |  |
| rs17727474 | C | 0.83 | 0.81 | 0.018  | 0.003 | 0.080  | 0.031 |  |
| rs17789218 | T | 0.76 | 0.77 | 0.019  | 0.003 | -0.014 | 0.029 |  |
| rs2034768  | A | 0.49 | 0.48 | 0.015  | 0.002 | 0.011  | 0.023 |  |
| rs2045147  | A | 0.45 | 0.46 | 0.013  | 0.002 | -0.006 | 0.023 |  |
| rs2073869  | C | 0.83 | 0.83 | 0.019  | 0.003 | -0.015 | 0.031 |  |
| rs2092829  | G | 0.71 | 0.70 | 0.014  | 0.002 | -0.035 | 0.025 |  |
| rs2164744  | T | 0.64 | 0.62 | -0.013 | 0.002 | -0.005 | 0.023 |  |
| rs2173650  | G | 0.85 | 0.84 | 0.018  | 0.003 | -0.031 | 0.032 |  |
| rs2184364  | A | 0.78 | 0.80 | 0.016  | 0.003 | -0.041 | 0.030 |  |
| rs2447098  | C | 0.48 | 0.48 | -0.015 | 0.002 | -0.022 | 0.023 |  |
| rs2460     | G | 0.74 | 0.75 | -0.015 | 0.003 | 0.034  | 0.027 |  |
| rs2584597  | T | 0.66 | 0.72 | 0.015  | 0.002 | 0.018  | 0.026 |  |
| rs2616830  | G | 0.46 | 0.45 | 0.017  | 0.002 | -0.036 | 0.023 |  |
| rs262890   | A | 0.70 | 0.70 | -0.019 | 0.002 | 0.011  | 0.025 |  |
| rs2717559  | A | 0.56 | 0.57 | 0.012  | 0.002 | -0.002 | 0.024 |  |
| rs2787374  | T | 0.41 | 0.42 | 0.013  | 0.002 | -0.012 | 0.023 |  |
| rs303753   | G | 0.65 | 0.65 | -0.015 | 0.002 | -0.022 | 0.024 |  |
| rs34864022 | A | 0.93 | 0.92 | -0.026 | 0.004 | -0.050 | 0.045 |  |
| rs35574015 | T | 0.71 | 0.70 | -0.013 | 0.002 | 0.026  | 0.025 |  |
| rs374722   | G | 0.15 | 0.16 | 0.025  | 0.003 | 0.044  | 0.032 |  |
| rs3754970  | T | 0.50 | 0.50 | -0.015 | 0.002 | -0.014 | 0.023 |  |
| rs3796386  | G | 0.57 | 0.58 | -0.026 | 0.002 | -0.025 | 0.025 |  |
| rs405797   | T | 0.25 | 0.32 | -0.015 | 0.003 | -0.021 | 0.028 |  |

|            |   |      |      |        |       |        |       |  |
|------------|---|------|------|--------|-------|--------|-------|--|
| rs42210    | G | 0.29 | 0.29 | -0.014 | 0.002 | -0.008 | 0.027 |  |
| rs4334769  | G | 0.47 | 0.48 | 0.012  | 0.002 | 0.013  | 0.023 |  |
| rs4382592  | T | 0.30 | 0.31 | 0.014  | 0.002 | 0.027  | 0.025 |  |
| rs4523073  | A | 0.59 | 0.61 | -0.014 | 0.002 | -0.031 | 0.024 |  |
| rs4577309  | A | 0.47 | 0.47 | 0.016  | 0.002 | 0.038  | 0.023 |  |
| rs4675246  | G | 0.80 | 0.80 | -0.015 | 0.003 | -0.053 | 0.029 |  |
| rs4775373  | T | 0.36 | 0.36 | 0.013  | 0.002 | 0.048  | 0.024 |  |
| rs4845364  | A | 0.50 | 0.49 | -0.015 | 0.002 | 0.043  | 0.023 |  |
| rs4937842  | G | 0.63 | 0.61 | -0.013 | 0.002 | 0.040  | 0.026 |  |
| rs4973576  | C | 0.30 | 0.30 | -0.015 | 0.002 | 0.046  | 0.025 |  |
| rs55700114 | G | 0.71 | 0.69 | -0.014 | 0.002 | -0.012 | 0.024 |  |
| rs55909997 | G | 0.65 | 0.66 | -0.014 | 0.002 | -0.032 | 0.024 |  |
| rs56103247 | C | 0.94 | 0.94 | 0.030  | 0.005 | -0.002 | 0.062 |  |
| rs56858768 | G | 0.70 | 0.70 | -0.015 | 0.002 | -0.007 | 0.026 |  |
| rs57585211 | T | 0.83 | 0.83 | -0.017 | 0.003 | -0.003 | 0.031 |  |
| rs6131281  | C | 0.60 | 0.60 | 0.016  | 0.002 | -0.034 | 0.023 |  |
| rs6141814  | C | 0.61 | 0.63 | -0.014 | 0.002 | 0.008  | 0.024 |  |
| rs62379379 | G | 0.93 | 0.92 | -0.026 | 0.004 | -0.053 | 0.045 |  |
| rs62641636 | A | 0.69 | 0.70 | 0.014  | 0.002 | 0.001  | 0.025 |  |
| rs6472942  | T | 0.57 | 0.56 | -0.013 | 0.002 | -0.030 | 0.023 |  |
| rs6673341  | T | 0.47 | 0.47 | -0.015 | 0.002 | -0.012 | 0.024 |  |
| rs66852340 | C | 0.78 | 0.78 | -0.018 | 0.003 | -0.026 | 0.028 |  |
| rs6721975  | T | 0.23 | 0.28 | -0.017 | 0.003 | -0.030 | 0.029 |  |
| rs6797840  | A | 0.46 | 0.47 | -0.016 | 0.002 | 0.017  | 0.024 |  |
| rs6825241  | C | 0.54 | 0.54 | -0.017 | 0.002 | -0.049 | 0.023 |  |

|            |   |      |      |        |       |        |       |           |
|------------|---|------|------|--------|-------|--------|-------|-----------|
| rs6850494  | A | 0.62 | 0.61 | -0.014 | 0.002 | 0.030  | 0.024 |           |
| rs6905544  | A | 0.40 | 0.40 | -0.019 | 0.002 | -0.035 | 0.024 |           |
| rs6973656  | A | 0.60 | 0.61 | -0.014 | 0.002 | -0.022 | 0.023 |           |
| rs6996198  | C | 0.84 | 0.85 | -0.016 | 0.003 | -0.033 | 0.032 |           |
| rs7089973  | C | 0.62 | 0.63 | -0.013 | 0.002 | 0.020  | 0.024 |           |
| rs7157001  | A | 0.74 | 0.74 | -0.014 | 0.003 | -0.007 | 0.030 |           |
| rs71658797 | T | 0.88 | 0.89 | -0.020 | 0.003 | -0.038 | 0.036 |           |
| rs7184800  | G | 0.70 | 0.69 | 0.017  | 0.002 | 0.004  | 0.025 |           |
| rs7189927  | T | 0.36 | 0.36 | 0.015  | 0.002 | -0.010 | 0.024 |           |
| rs7248205  | C | 0.40 | 0.41 | 0.014  | 0.002 | 0.004  | 0.024 |           |
| rs72671494 | T | 0.86 | 0.86 | -0.017 | 0.003 | 0.004  | 0.036 |           |
| rs72781699 | G | 0.80 | 0.80 | -0.019 | 0.003 | -0.015 | 0.028 |           |
| rs72828890 | C | 0.87 | 0.87 | 0.019  | 0.003 | -0.035 | 0.037 |           |
| rs72834698 | G | 0.86 | 0.86 | 0.023  | 0.003 | -0.058 | 0.034 |           |
| rs749671   | G | 0.63 | 0.62 | 0.016  | 0.002 | -0.036 | 0.024 |           |
| rs7564130  | T | 0.64 | 0.64 | -0.015 | 0.002 | -0.006 | 0.024 |           |
| rs7693082  | G | 0.30 | 0.30 | 0.015  | 0.002 | 0.028  | 0.025 |           |
| rs7693703  | G | 0.91 | 0.91 | 0.023  | 0.004 | 0.060  | 0.042 |           |
| rs7700107  | A | 0.86 | 0.87 | -0.021 | 0.003 | -0.119 | 0.034 |           |
| rs7716447  | A | 0.64 | 0.71 | -0.013 | 0.002 | -0.032 | 0.028 |           |
| rs77215114 | A | 0.93 | 0.92 | 0.024  | 0.004 | 0.059  | 0.050 |           |
| rs7834121  | G | 0.50 | 0.49 | -0.014 | 0.002 | -0.039 | 0.009 | rs7843666 |
| rs7991062  | C | 0.66 | 0.65 | -0.018 | 0.002 | -0.049 | 0.025 |           |
| rs801733   | A | 0.64 | 0.65 | 0.017  | 0.002 | 0.044  | 0.024 |           |
| rs8043253  | C | 0.57 | 0.57 | -0.012 | 0.002 | -0.058 | 0.023 |           |



|           |   |      |      |        |       |        |       |  |
|-----------|---|------|------|--------|-------|--------|-------|--|
| rs8756    | C | 0.48 | 0.48 | -0.014 | 0.002 | -0.029 | 0.025 |  |
| rs9471333 | C | 0.45 | 0.44 | 0.013  | 0.002 | -0.012 | 0.023 |  |
| rs9563168 | G | 0.79 | 0.79 | 0.018  | 0.003 | 0.011  | 0.028 |  |
| rs9569734 | A | 0.84 | 0.85 | 0.019  | 0.003 | -0.063 | 0.033 |  |
| rs9718104 | T | 0.94 | 0.94 | -0.041 | 0.005 | 0.013  | 0.061 |  |
| rs973734  | C | 0.15 | 0.15 | 0.017  | 0.003 | 0.002  | 0.033 |  |
| rs9834970 | T | 0.50 | 0.51 | 0.013  | 0.002 | -0.012 | 0.023 |  |
| rs984409  | G | 0.36 | 0.36 | -0.015 | 0.002 | -0.025 | 0.024 |  |
| rs9867121 | C | 0.82 | 0.82 | 0.020  | 0.003 | -0.002 | 0.030 |  |
| rs9902312 | T | 0.68 | 0.67 | 0.015  | 0.002 | -0.027 | 0.024 |  |
| rs9964724 | C | 0.32 | 0.32 | 0.018  | 0.002 | 0.015  | 0.025 |  |

**Supplementary Table 12. Summary data for the genetic association between television watching and Parkinson's disease.**

| SNP         | effect_allele | eaf.exposure | eaf.outcome | beta.exposure | se.exposure | beta.outcome | se.outcome | proxy     |
|-------------|---------------|--------------|-------------|---------------|-------------|--------------|------------|-----------|
| rs10041724  | T             | 0.81         | 0.80        | 0.018         | 0.003       | -0.087       | 0.028      |           |
| rs10054327  | G             | 0.58         | 0.59        | 0.017         | 0.002       | 0.006        | 0.017      |           |
| rs10145592  | C             | 0.41         | 0.40        | -0.015        | 0.002       | -0.002       | 0.018      |           |
| rs10189857  | A             | 0.57         | 0.58        | -0.021        | 0.002       | 0.036        | 0.017      |           |
| rs1022785   | G             | 0.14         | 0.15        | 0.018         | 0.003       | 0.000        | 0.031      |           |
| rs10234444  | G             | 0.82         | 0.83        | 0.016         | 0.003       | -0.009       | 0.030      |           |
| rs10246289  | A             | 0.11         | 0.11        | 0.019         | 0.003       | 0.019        | 0.036      |           |
| rs1031423   | T             | 0.22         | 0.21        | -0.019        | 0.003       | 0.044        | 0.025      |           |
| rs10427502  | G             | 0.62         | 0.63        | 0.014         | 0.002       | 0.012        | 0.020      |           |
| rs10737620  | T             | 0.27         | 0.27        | 0.014         | 0.002       | 0.008        | 0.021      |           |
| rs10771746  | C             | 0.72         | 0.72        | -0.014        | 0.002       | 0.044        | 0.020      |           |
| rs10772643  | C             | 0.11         | 0.11        | 0.025         | 0.004       | -0.002       | 0.037      |           |
| rs10876864  | G             | 0.43         | 0.42        | -0.013        | 0.002       | 0.011        | 0.018      |           |
| rs10890123  | C             | 0.77         | 0.79        | 0.014         | 0.003       | -0.016       | 0.024      |           |
| rs10932837  | C             | 0.49         | 0.49        | -0.013        | 0.002       | 0.006        | 0.022      |           |
| rs10940659  | A             | 0.53         | 0.53        | -0.013        | 0.002       | -0.004       | 0.021      |           |
| rs10994943  | T             | 0.58         | 0.60        | 0.013         | 0.002       | -0.020       | 0.018      |           |
| rs11020045  | A             | 0.67         | 0.68        | -0.013        | 0.002       | -0.003       | 0.021      | rs1792360 |
| rs11130793  | C             | 0.60         | 0.63        | 0.013         | 0.002       | 0.004        | 0.021      |           |
| rs111901094 | G             | 0.82         | 0.11        | -0.017        | 0.003       | -0.045       | 0.029      |           |
| rs11201422  | T             | 0.67         | 0.68        | 0.013         | 0.002       | -0.016       | 0.024      |           |
| rs11218575  | C             | 0.57         | 0.58        | 0.015         | 0.002       | 0.013        | 0.019      |           |
| rs11245482  | T             | 0.61         | 0.62        | -0.013        | 0.002       | -0.024       | 0.019      |           |

|             |   |      |      |        |       |        |       |  |
|-------------|---|------|------|--------|-------|--------|-------|--|
| rs114328297 | T | 0.78 | 0.79 | 0.014  | 0.003 | -0.029 | 0.028 |  |
| rs114600294 | G | 0.79 | 0.80 | -0.016 | 0.003 | 0.012  | 0.031 |  |
| rs1156541   | C | 0.22 | 0.23 | 0.015  | 0.003 | -0.001 | 0.027 |  |
| rs11654952  | T | 0.86 | 0.86 | -0.017 | 0.003 | 0.002  | 0.025 |  |
| rs11657730  | C | 0.64 | 0.64 | 0.013  | 0.002 | 0.014  | 0.024 |  |
| rs11689199  | A | 0.60 | 0.60 | 0.019  | 0.002 | -0.019 | 0.018 |  |
| rs11714337  | G | 0.57 | 0.56 | 0.014  | 0.002 | -0.018 | 0.023 |  |
| rs11763734  | A | 0.51 | 0.52 | -0.013 | 0.002 | 0.016  | 0.019 |  |
| rs11810109  | A | 0.70 | 0.69 | 0.016  | 0.002 | -0.047 | 0.020 |  |
| rs12105701  | C | 0.40 | 0.40 | -0.013 | 0.002 | -0.007 | 0.023 |  |
| rs12272012  | G | 0.96 | 0.96 | -0.030 | 0.005 | 0.040  | 0.059 |  |
| rs12289262  | C | 0.73 | 0.73 | -0.014 | 0.002 | 0.022  | 0.026 |  |
| rs1243182   | C | 0.69 | 0.67 | -0.019 | 0.002 | -0.010 | 0.019 |  |
| rs12491503  | G | 0.67 | 0.67 | -0.014 | 0.002 | 0.019  | 0.018 |  |
| rs12541615  | T | 0.82 | 0.82 | -0.018 | 0.003 | 0.010  | 0.025 |  |
| rs12554512  | T | 0.58 | 0.60 | 0.021  | 0.002 | 0.016  | 0.023 |  |
| rs12725114  | G | 0.80 | 0.80 | 0.015  | 0.003 | 0.015  | 0.027 |  |
| rs1278847   | C | 0.69 | 0.70 | 0.016  | 0.002 | -0.003 | 0.020 |  |
| rs13029509  | G | 0.52 | 0.53 | -0.018 | 0.002 | 0.006  | 0.022 |  |
| rs13107325  | C | 0.93 | 0.92 | -0.029 | 0.004 | 0.031  | 0.032 |  |
| rs138256022 | C | 0.96 | 0.96 | -0.031 | 0.006 | -0.001 | 0.066 |  |
| rs1421334   | A | 0.45 | 0.44 | 0.017  | 0.002 | 0.021  | 0.020 |  |
| rs1451533   | G | 0.72 | 0.74 | -0.016 | 0.002 | -0.035 | 0.025 |  |
| rs17207890  | G | 0.66 | 0.65 | 0.016  | 0.002 | 0.021  | 0.019 |  |
| rs17379561  | A | 0.86 | 0.86 | -0.026 | 0.003 | -0.001 | 0.026 |  |

|            |   |      |      |        |       |        |       |            |
|------------|---|------|------|--------|-------|--------|-------|------------|
| rs17512836 | T | 0.97 | 0.97 | 0.042  | 0.007 | 0.060  | 0.049 |            |
| rs17727474 | C | 0.83 | 0.82 | 0.018  | 0.003 | -0.024 | 0.035 |            |
| rs17789218 | T | 0.76 | 0.75 | 0.019  | 0.003 | -0.011 | 0.026 |            |
| rs2034768  | A | 0.49 | 0.48 | 0.015  | 0.002 | -0.001 | 0.019 |            |
| rs2045147  | A | 0.45 | 0.46 | 0.013  | 0.002 | 0.007  | 0.022 |            |
| rs2073869  | C | 0.83 | 0.83 | 0.019  | 0.003 | -0.056 | 0.026 |            |
| rs2164744  | T | 0.64 | 0.61 | -0.013 | 0.002 | 0.022  | 0.018 |            |
| rs2173650  | G | 0.85 | 0.84 | 0.018  | 0.003 | 0.048  | 0.031 |            |
| rs2184364  | A | 0.78 | 0.81 | 0.016  | 0.003 | -0.006 | 0.025 | rs12201987 |
| rs2447098  | C | 0.48 | 0.48 | -0.015 | 0.002 | -0.026 | 0.019 |            |
| rs2460     | G | 0.74 | 0.75 | -0.015 | 0.003 | 0.010  | 0.026 |            |
| rs2616830  | G | 0.46 | 0.44 | 0.017  | 0.002 | -0.004 | 0.022 |            |
| rs262890   | A | 0.70 | 0.71 | -0.019 | 0.002 | -0.001 | 0.025 |            |
| rs2717559  | A | 0.56 | 0.55 | 0.012  | 0.002 | -0.015 | 0.018 |            |
| rs2787374  | T | 0.41 | 0.43 | 0.013  | 0.002 | -0.011 | 0.018 |            |
| rs303753   | G | 0.65 | 0.65 | -0.015 | 0.002 | -0.002 | 0.018 |            |
| rs34864022 | A | 0.93 | 0.94 | -0.026 | 0.004 | -0.010 | 0.048 |            |
| rs35574015 | T | 0.71 | 0.70 | -0.013 | 0.002 | 0.015  | 0.019 |            |
| rs374722   | G | 0.15 | 0.15 | 0.025  | 0.003 | 0.032  | 0.033 |            |
| rs3754970  | T | 0.50 | 0.52 | -0.015 | 0.002 | -0.016 | 0.018 |            |
| rs3796386  | G | 0.57 | 0.58 | -0.026 | 0.002 | -0.013 | 0.017 |            |
| rs405797   | T | 0.25 | 0.26 | -0.015 | 0.003 | -0.016 | 0.026 | rs178224   |
| rs42210    | G | 0.29 | 0.29 | -0.014 | 0.002 | 0.016  | 0.025 |            |
| rs4334769  | G | 0.47 | 0.48 | 0.012  | 0.002 | 0.018  | 0.022 |            |
| rs4382592  | T | 0.30 | 0.32 | 0.014  | 0.002 | -0.032 | 0.024 |            |

|            |   |      |      |        |       |        |       |           |
|------------|---|------|------|--------|-------|--------|-------|-----------|
| rs4523073  | A | 0.59 | 0.60 | -0.014 | 0.002 | 0.003  | 0.023 |           |
| rs4577309  | A | 0.47 | 0.46 | 0.016  | 0.002 | 0.003  | 0.019 |           |
| rs4675246  | G | 0.80 | 0.80 | -0.015 | 0.003 | 0.009  | 0.028 |           |
| rs4775373  | T | 0.36 | 0.36 | 0.013  | 0.002 | -0.036 | 0.023 |           |
| rs4845364  | A | 0.50 | 0.49 | -0.015 | 0.002 | 0.001  | 0.018 |           |
| rs4937842  | G | 0.63 | 0.62 | -0.013 | 0.002 | 0.058  | 0.018 |           |
| rs4973576  | C | 0.30 | 0.30 | -0.015 | 0.002 | 0.007  | 0.024 |           |
| rs55700114 | G | 0.71 | 0.69 | -0.014 | 0.002 | 0.017  | 0.019 |           |
| rs55909997 | G | 0.65 | 0.66 | -0.014 | 0.002 | 0.020  | 0.020 | rs2335077 |
| rs56103247 | C | 0.94 | 0.95 | 0.030  | 0.005 | 0.037  | 0.045 |           |
| rs56858768 | G | 0.70 | 0.71 | -0.015 | 0.002 | 0.012  | 0.025 |           |
| rs57585211 | T | 0.83 | 0.83 | -0.017 | 0.003 | -0.008 | 0.030 |           |
| rs6131281  | C | 0.60 | 0.59 | 0.016  | 0.002 | -0.020 | 0.023 |           |
| rs6141814  | C | 0.61 | 0.63 | -0.014 | 0.002 | 0.037  | 0.023 |           |
| rs62379379 | G | 0.93 | 0.93 | -0.026 | 0.004 | 0.025  | 0.040 |           |
| rs62641636 | A | 0.69 | 0.68 | 0.014  | 0.002 | 0.036  | 0.019 |           |
| rs6472942  | T | 0.57 | 0.56 | -0.013 | 0.002 | 0.018  | 0.019 |           |
| rs6673341  | T | 0.47 | 0.47 | -0.015 | 0.002 | 0.017  | 0.018 |           |
| rs66852340 | C | 0.78 | 0.77 | -0.018 | 0.003 | 0.005  | 0.023 | rs7668784 |
| rs6797840  | A | 0.46 | 0.46 | -0.016 | 0.002 | 0.015  | 0.018 |           |
| rs6825241  | C | 0.54 | 0.55 | -0.017 | 0.002 | 0.004  | 0.020 |           |
| rs6850494  | A | 0.62 | 0.61 | -0.014 | 0.002 | 0.000  | 0.019 |           |
| rs6905544  | A | 0.40 | 0.40 | -0.019 | 0.002 | 0.046  | 0.023 |           |
| rs6973656  | A | 0.60 | 0.60 | -0.014 | 0.002 | -0.008 | 0.018 |           |
| rs6996198  | C | 0.84 | 0.84 | -0.016 | 0.003 | -0.041 | 0.024 |           |

|            |   |      |      |        |       |        |       |            |
|------------|---|------|------|--------|-------|--------|-------|------------|
| rs7089973  | C | 0.62 | 0.64 | -0.013 | 0.002 | 0.039  | 0.019 |            |
| rs7157001  | A | 0.74 | 0.75 | -0.014 | 0.003 | 0.021  | 0.028 |            |
| rs71658797 | T | 0.88 | 0.89 | -0.020 | 0.003 | 0.005  | 0.032 |            |
| rs7184800  | G | 0.70 | 0.68 | 0.017  | 0.002 | 0.006  | 0.024 |            |
| rs7189927  | T | 0.36 | 0.33 | 0.015  | 0.002 | -0.065 | 0.018 |            |
| rs7248205  | C | 0.40 | 0.41 | 0.014  | 0.002 | 0.029  | 0.018 |            |
| rs72671494 | T | 0.86 | 0.87 | -0.017 | 0.003 | 0.029  | 0.034 |            |
| rs72781699 | G | 0.80 | 0.80 | -0.019 | 0.003 | 0.047  | 0.023 |            |
| rs72828890 | C | 0.87 | 0.88 | 0.019  | 0.003 | -0.024 | 0.037 |            |
| rs72834698 | G | 0.86 | 0.86 | 0.023  | 0.003 | -0.005 | 0.026 |            |
| rs749671   | G | 0.63 | 0.59 | 0.016  | 0.002 | -0.084 | 0.018 |            |
| rs7564130  | T | 0.64 | 0.63 | -0.015 | 0.002 | 0.010  | 0.023 |            |
| rs7693082  | G | 0.30 | 0.30 | 0.015  | 0.002 | -0.006 | 0.021 |            |
| rs7693703  | G | 0.91 | 0.91 | 0.023  | 0.004 | 0.036  | 0.040 |            |
| rs7700107  | A | 0.86 | 0.86 | -0.021 | 0.003 | 0.077  | 0.026 |            |
| rs7716447  | A | 0.64 | 0.63 | -0.013 | 0.002 | 0.001  | 0.017 | rs16867703 |
| rs77215114 | A | 0.93 | 0.93 | 0.024  | 0.004 | 0.009  | 0.047 |            |
| rs7834121  | G | 0.50 | 0.48 | -0.014 | 0.002 | 0.010  | 0.022 | rs7821826  |
| rs7991062  | C | 0.66 | 0.67 | -0.018 | 0.002 | -0.016 | 0.024 | rs7335993  |
| rs801733   | A | 0.64 | 0.65 | 0.017  | 0.002 | -0.019 | 0.019 |            |
| rs8043253  | C | 0.57 | 0.57 | -0.012 | 0.002 | 0.012  | 0.018 |            |
| rs8756     | C | 0.48 | 0.47 | -0.014 | 0.002 | 0.030  | 0.017 |            |
| rs9471333  | C | 0.45 | 0.44 | 0.013  | 0.002 | 0.010  | 0.022 |            |
| rs9563168  | G | 0.79 | 0.78 | 0.018  | 0.003 | 0.002  | 0.024 |            |
| rs9569734  | A | 0.84 | 0.88 | 0.019  | 0.003 | 0.040  | 0.035 | rs4886037  |

|           |   |      |      |        |       |        |       |  |
|-----------|---|------|------|--------|-------|--------|-------|--|
| rs9718104 | T | 0.94 | 0.94 | -0.041 | 0.005 | -0.047 | 0.048 |  |
| rs973734  | C | 0.15 | 0.15 | 0.017  | 0.003 | 0.032  | 0.031 |  |
| rs9834970 | T | 0.50 | 0.50 | 0.013  | 0.002 | 0.009  | 0.017 |  |
| rs984409  | G | 0.36 | 0.36 | -0.015 | 0.002 | -0.003 | 0.020 |  |
| rs9867121 | C | 0.82 | 0.81 | 0.020  | 0.003 | -0.031 | 0.029 |  |
| rs9902312 | T | 0.68 | 0.68 | 0.015  | 0.002 | 0.026  | 0.023 |  |
| rs9964724 | C | 0.32 | 0.31 | 0.018  | 0.002 | 0.007  | 0.024 |  |

**Supplementary Table 13. Summary data for the genetic association between television watching and cognitive performance.**

| SNP         | effect_allele | eaf.exposure | eaf.outcome | beta.exposure | se.exposure | beta.outcome | se.outcome | proxy      |
|-------------|---------------|--------------|-------------|---------------|-------------|--------------|------------|------------|
| rs10041724  | T             | 0.81         | 0.80        | 0.018         | 0.003       | -0.012       | 0.004      |            |
| rs10054327  | G             | 0.58         | 0.55        | 0.017         | 0.002       | 0.004        | 0.003      |            |
| rs10145592  | C             | 0.41         | 0.39        | -0.015        | 0.002       | 0.005        | 0.003      |            |
| rs10189857  | A             | 0.57         | 0.58        | -0.021        | 0.002       | 0.023        | 0.003      |            |
| rs1022785   | G             | 0.14         | 0.15        | 0.018         | 0.003       | -0.019       | 0.004      |            |
| rs10234444  | G             | 0.82         | 0.80        | 0.016         | 0.003       | -0.001       | 0.004      |            |
| rs10246289  | A             | 0.11         | 0.12        | 0.019         | 0.003       | -0.006       | 0.004      |            |
| rs1031423   | T             | 0.22         | 0.21        | -0.019        | 0.003       | 0.004        | 0.003      |            |
| rs10427502  | G             | 0.62         | 0.65        | 0.014         | 0.002       | -0.015       | 0.003      |            |
| rs10737620  | T             | 0.27         | 0.30        | 0.014         | 0.002       | -0.013       | 0.003      |            |
| rs10771746  | C             | 0.72         | 0.73        | -0.014        | 0.002       | 0.006        | 0.003      |            |
| rs10772643  | C             | 0.11         | 0.11        | 0.025         | 0.004       | 0.000        | 0.005      |            |
| rs10876864  | G             | 0.43         | 0.42        | -0.013        | 0.002       | 0.017        | 0.003      |            |
| rs10890123  | C             | 0.77         | 0.75        | 0.014         | 0.003       | -0.006       | 0.003      |            |
| rs10932837  | C             | 0.49         | 0.51        | -0.013        | 0.002       | 0.000        | 0.003      |            |
| rs10940659  | A             | 0.53         | 0.53        | -0.013        | 0.002       | 0.007        | 0.003      |            |
| rs10994943  | T             | 0.58         | 0.60        | 0.013         | 0.002       | 0.001        | 0.003      |            |
| rs11020045  | A             | 0.67         | 0.67        | -0.013        | 0.002       | -0.002       | 0.003      | rs1674086  |
| rs11130793  | C             | 0.60         | 0.63        | 0.013         | 0.002       | -0.009       | 0.003      |            |
| rs111901094 | G             | 0.82         | 0.88        | -0.017        | 0.003       | 0.007        | 0.004      | rs10415849 |
| rs11201422  | T             | 0.67         | 0.67        | 0.013         | 0.002       | -0.001       | 0.003      |            |
| rs11218575  | C             | 0.57         | 0.54        | 0.015         | 0.002       | -0.001       | 0.003      |            |
| rs11245482  | T             | 0.61         | 0.58        | -0.013        | 0.002       | 0.003        | 0.003      |            |



|             |   |      |      |        |       |        |       |            |
|-------------|---|------|------|--------|-------|--------|-------|------------|
| rs114328297 | T | 0.78 | 0.78 | 0.014  | 0.003 | -0.007 | 0.003 |            |
| rs114600294 | G | 0.79 | 0.78 | -0.016 | 0.003 | -0.002 | 0.004 |            |
| rs1156541   | C | 0.22 | 0.22 | 0.015  | 0.003 | -0.003 | 0.003 |            |
| rs11654952  | T | 0.86 | 0.89 | -0.017 | 0.003 | -0.001 | 0.004 |            |
| rs11657730  | C | 0.64 | 0.66 | 0.013  | 0.002 | -0.011 | 0.003 |            |
| rs11689199  | A | 0.60 | 0.59 | 0.019  | 0.002 | -0.022 | 0.003 |            |
| rs11714337  | G | 0.57 | 0.55 | 0.014  | 0.002 | -0.016 | 0.003 |            |
| rs11763734  | A | 0.51 | 0.51 | -0.013 | 0.002 | 0.001  | 0.003 |            |
| rs11810109  | A | 0.70 | 0.72 | 0.016  | 0.002 | -0.017 | 0.003 |            |
| rs12105701  | C | 0.40 | 0.40 | -0.013 | 0.002 | 0.012  | 0.003 |            |
| rs12272012  | G | 0.96 | 0.95 | -0.030 | 0.005 | 0.011  | 0.007 |            |
| rs12289262  | C | 0.73 | 0.73 | -0.014 | 0.002 | 0.011  | 0.003 |            |
| rs1243182   | C | 0.69 | 0.67 | -0.019 | 0.002 | 0.009  | 0.003 |            |
| rs12476388  | C | 0.71 | 0.70 | 0.013  | 0.002 | 0.003  | 0.003 | rs35094031 |
| rs12491503  | G | 0.67 | 0.67 | -0.014 | 0.002 | 0.006  | 0.003 |            |
| rs12541615  | T | 0.82 | 0.81 | -0.018 | 0.003 | 0.018  | 0.004 |            |
| rs12554512  | T | 0.58 | 0.56 | 0.021  | 0.002 | -0.027 | 0.003 |            |
| rs12725114  | G | 0.80 | 0.78 | 0.015  | 0.003 | 0.005  | 0.004 |            |
| rs1278847   | C | 0.69 | 0.70 | 0.016  | 0.002 | -0.022 | 0.003 |            |
| rs13029509  | G | 0.52 | 0.53 | -0.018 | 0.002 | 0.006  | 0.003 |            |
| rs13107325  | C | 0.93 | 0.91 | -0.029 | 0.004 | 0.054  | 0.005 |            |
| rs138256022 | C | 0.96 | 0.96 | -0.031 | 0.006 | 0.002  | 0.007 |            |
| rs1421334   | A | 0.45 | 0.41 | 0.017  | 0.002 | -0.015 | 0.003 |            |
| rs1451533   | G | 0.72 | 0.77 | -0.016 | 0.002 | -0.002 | 0.003 |            |
| rs17207890  | G | 0.66 | 0.65 | 0.016  | 0.002 | -0.017 | 0.003 |            |

|            |   |      |      |        |       |        |       |            |
|------------|---|------|------|--------|-------|--------|-------|------------|
| rs17379561 | A | 0.86 | 0.88 | -0.026 | 0.003 | 0.005  | 0.004 |            |
| rs17512836 | T | 0.97 | 0.97 | 0.042  | 0.007 | -0.006 | 0.009 |            |
| rs17727474 | C | 0.83 | 0.82 | 0.018  | 0.003 | -0.007 | 0.004 |            |
| rs17789218 | T | 0.76 | 0.76 | 0.019  | 0.003 | -0.005 | 0.003 |            |
| rs2034768  | A | 0.49 | 0.46 | 0.015  | 0.002 | -0.007 | 0.003 |            |
| rs2045147  | A | 0.45 | 0.44 | 0.013  | 0.002 | 0.001  | 0.003 |            |
| rs2073869  | C | 0.83 | 0.84 | 0.019  | 0.003 | -0.012 | 0.004 |            |
| rs2092829  | G | 0.71 | 0.74 | 0.014  | 0.002 | 0.011  | 0.003 | rs2413032  |
| rs2164744  | T | 0.64 | 0.61 | -0.013 | 0.002 | -0.004 | 0.003 |            |
| rs2173650  | G | 0.85 | 0.83 | 0.018  | 0.003 | 0.007  | 0.004 |            |
| rs2184364  | A | 0.78 | 0.82 | 0.016  | 0.003 | 0.001  | 0.004 | rs12210048 |
| rs2447098  | C | 0.48 | 0.48 | -0.015 | 0.002 | 0.004  | 0.003 |            |
| rs2460     | G | 0.74 | 0.75 | -0.015 | 0.003 | 0.009  | 0.003 |            |
| rs2616830  | G | 0.46 | 0.40 | 0.017  | 0.002 | -0.002 | 0.003 |            |
| rs262890   | A | 0.70 | 0.71 | -0.019 | 0.002 | 0.016  | 0.003 |            |
| rs2717559  | A | 0.56 | 0.55 | 0.012  | 0.002 | -0.005 | 0.003 |            |
| rs2787374  | T | 0.41 | 0.44 | 0.013  | 0.002 | 0.004  | 0.003 |            |
| rs303753   | G | 0.65 | 0.68 | -0.015 | 0.002 | 0.009  | 0.003 |            |
| rs34864022 | A | 0.93 | 0.93 | -0.026 | 0.004 | 0.010  | 0.006 |            |
| rs35574015 | T | 0.71 | 0.71 | -0.013 | 0.002 | 0.002  | 0.003 |            |
| rs374722   | G | 0.15 | 0.15 | 0.025  | 0.003 | -0.003 | 0.004 |            |
| rs3754970  | T | 0.50 | 0.51 | -0.015 | 0.002 | 0.018  | 0.003 |            |
| rs3796386  | G | 0.57 | 0.54 | -0.026 | 0.002 | 0.025  | 0.003 |            |
| rs405797   | T | 0.25 | 0.27 | -0.015 | 0.003 | 0.019  | 0.003 | rs1268446  |
| rs42210    | G | 0.29 | 0.29 | -0.014 | 0.002 | 0.004  | 0.003 |            |

|            |   |      |      |        |       |        |       |            |
|------------|---|------|------|--------|-------|--------|-------|------------|
| rs4334769  | G | 0.47 | 0.51 | 0.012  | 0.002 | -0.001 | 0.003 |            |
| rs4382592  | T | 0.30 | 0.30 | 0.014  | 0.002 | -0.014 | 0.003 |            |
| rs4523073  | A | 0.59 | 0.58 | -0.014 | 0.002 | 0.008  | 0.003 |            |
| rs4577309  | A | 0.47 | 0.46 | 0.016  | 0.002 | 0.001  | 0.003 |            |
| rs4675246  | G | 0.80 | 0.81 | -0.015 | 0.003 | 0.009  | 0.004 |            |
| rs4775373  | T | 0.36 | 0.37 | 0.013  | 0.002 | -0.007 | 0.003 |            |
| rs4845364  | A | 0.50 | 0.51 | -0.015 | 0.002 | 0.012  | 0.003 |            |
| rs4937842  | G | 0.63 | 0.60 | -0.013 | 0.002 | -0.002 | 0.003 |            |
| rs4973576  | C | 0.30 | 0.34 | -0.015 | 0.002 | -0.002 | 0.003 |            |
| rs55700114 | G | 0.71 | 0.72 | -0.014 | 0.002 | 0.009  | 0.003 |            |
| rs55909997 | G | 0.65 | 0.65 | -0.014 | 0.002 | 0.004  | 0.003 | rs12408634 |
| rs56103247 | C | 0.94 | 0.95 | 0.030  | 0.005 | -0.004 | 0.006 |            |
| rs56858768 | G | 0.70 | 0.70 | -0.015 | 0.002 | 0.005  | 0.003 |            |
| rs57585211 | T | 0.83 | 0.84 | -0.017 | 0.003 | 0.018  | 0.004 |            |
| rs6131281  | C | 0.60 | 0.57 | 0.016  | 0.002 | -0.011 | 0.003 |            |
| rs6141814  | C | 0.61 | 0.65 | -0.014 | 0.002 | 0.011  | 0.003 |            |
| rs62379379 | G | 0.93 | 0.93 | -0.026 | 0.004 | 0.021  | 0.006 |            |
| rs62641636 | A | 0.69 | 0.73 | 0.014  | 0.002 | -0.016 | 0.003 |            |
| rs6472942  | T | 0.57 | 0.55 | -0.013 | 0.002 | -0.001 | 0.003 |            |
| rs6673341  | T | 0.47 | 0.46 | -0.015 | 0.002 | 0.006  | 0.003 |            |
| rs66852340 | C | 0.78 | 0.78 | -0.018 | 0.003 | 0.011  | 0.003 | rs6829279  |
| rs6797840  | A | 0.46 | 0.48 | -0.016 | 0.002 | 0.008  | 0.003 |            |
| rs6825241  | C | 0.54 | 0.54 | -0.017 | 0.002 | 0.016  | 0.003 |            |
| rs6850494  | A | 0.62 | 0.61 | -0.014 | 0.002 | 0.008  | 0.003 |            |
| rs6905544  | A | 0.40 | 0.42 | -0.019 | 0.002 | 0.029  | 0.003 |            |

|            |   |      |      |        |       |        |       |           |
|------------|---|------|------|--------|-------|--------|-------|-----------|
| rs6973656  | A | 0.60 | 0.54 | -0.014 | 0.002 | 0.005  | 0.003 |           |
| rs6996198  | C | 0.84 | 0.81 | -0.016 | 0.003 | -0.003 | 0.004 |           |
| rs7089973  | C | 0.62 | 0.61 | -0.013 | 0.002 | 0.003  | 0.003 |           |
| rs7157001  | A | 0.74 | 0.77 | -0.014 | 0.003 | 0.006  | 0.003 |           |
| rs71658797 | T | 0.88 | 0.90 | -0.020 | 0.003 | -0.005 | 0.004 |           |
| rs7184800  | G | 0.70 | 0.68 | 0.017  | 0.002 | -0.025 | 0.003 |           |
| rs7189927  | T | 0.36 | 0.32 | 0.015  | 0.002 | -0.024 | 0.003 |           |
| rs7248205  | C | 0.40 | 0.43 | 0.014  | 0.002 | 0.006  | 0.003 |           |
| rs72671494 | T | 0.86 | 0.86 | -0.017 | 0.003 | 0.001  | 0.004 |           |
| rs72781699 | G | 0.80 | 0.79 | -0.019 | 0.003 | -0.001 | 0.004 |           |
| rs72828890 | C | 0.87 | 0.88 | 0.019  | 0.003 | -0.011 | 0.004 |           |
| rs72834698 | G | 0.86 | 0.84 | 0.023  | 0.003 | 0.002  | 0.004 |           |
| rs749671   | G | 0.63 | 0.62 | 0.016  | 0.002 | 0.005  | 0.003 |           |
| rs7564130  | T | 0.64 | 0.62 | -0.015 | 0.002 | 0.003  | 0.003 |           |
| rs7693082  | G | 0.30 | 0.31 | 0.015  | 0.002 | -0.011 | 0.003 |           |
| rs7693703  | G | 0.91 | 0.91 | 0.023  | 0.004 | -0.007 | 0.005 |           |
| rs7700107  | A | 0.86 | 0.89 | -0.021 | 0.003 | 0.025  | 0.004 |           |
| rs7716447  | A | 0.64 | 0.62 | -0.013 | 0.002 | 0.011  | 0.003 | rs4382197 |
| rs77215114 | A | 0.93 | 0.94 | 0.024  | 0.004 | -0.011 | 0.006 |           |
| rs7834121  | G | 0.50 | 0.52 | -0.014 | 0.002 | 0.006  | 0.003 | rs6997839 |
| rs7991062  | C | 0.66 | 0.65 | -0.018 | 0.002 | 0.001  | 0.003 | rs7335993 |
| rs801733   | A | 0.64 | 0.64 | 0.017  | 0.002 | -0.003 | 0.003 |           |
| rs8043253  | C | 0.57 | 0.56 | -0.012 | 0.002 | -0.006 | 0.003 |           |
| rs8756     | C | 0.48 | 0.45 | -0.014 | 0.002 | 0.005  | 0.003 |           |
| rs9471333  | C | 0.45 | 0.42 | 0.013  | 0.002 | -0.008 | 0.003 |           |

|           |   |      |      |        |       |        |       |           |
|-----------|---|------|------|--------|-------|--------|-------|-----------|
| rs9563168 | G | 0.79 | 0.77 | 0.018  | 0.003 | -0.002 | 0.004 |           |
| rs9569734 | A | 0.84 | 0.88 | 0.019  | 0.003 | -0.003 | 0.004 | rs4886037 |
| rs9718104 | T | 0.94 | 0.94 | -0.041 | 0.005 | -0.007 | 0.006 |           |
| rs973734  | C | 0.15 | 0.12 | 0.017  | 0.003 | -0.002 | 0.004 |           |
| rs9834970 | T | 0.50 | 0.45 | 0.013  | 0.002 | -0.004 | 0.003 |           |
| rs984409  | G | 0.36 | 0.37 | -0.015 | 0.002 | 0.008  | 0.003 |           |
| rs9867121 | C | 0.82 | 0.83 | 0.020  | 0.003 | 0.003  | 0.004 |           |
| rs9902312 | T | 0.68 | 0.66 | 0.015  | 0.002 | 0.001  | 0.003 |           |
| rs9964724 | C | 0.32 | 0.34 | 0.018  | 0.002 | -0.007 | 0.003 |           |

**Supplementary Table 14. Summary data for the genetic association between computer use and cognitive performance.**

| SNP         | effect_allele | eaf.exposure | eaf.outcome | beta.exposure | se.exposure | beta.outcome | se.outcome | proxy |
|-------------|---------------|--------------|-------------|---------------|-------------|--------------|------------|-------|
| rs10208088  | C             | 0.42         | 0.43        | 0.013         | 0.002       | 0.000        | 0.003      |       |
| rs10754920  | C             | 0.11         | 0.15        | 0.020         | 0.004       | 0.007        | 0.004      |       |
| rs113851275 | G             | 0.89         | 0.89        | -0.021        | 0.004       | -0.016       | 0.005      |       |
| rs11749912  | A             | 0.42         | 0.43        | 0.014         | 0.002       | 0.020        | 0.003      |       |
| rs12145677  | G             | 0.70         | 0.70        | -0.017        | 0.002       | -0.022       | 0.003      |       |
| rs12603813  | T             | 0.75         | 0.71        | 0.014         | 0.003       | 0.008        | 0.003      |       |
| rs12706626  | G             | 0.62         | 0.59        | -0.013        | 0.002       | -0.007       | 0.003      |       |
| rs13262595  | A             | 0.44         | 0.44        | -0.016        | 0.002       | -0.020       | 0.003      |       |
| rs136553    | C             | 0.62         | 0.61        | -0.015        | 0.002       | -0.016       | 0.003      |       |
| rs1448355   | C             | 0.38         | 0.38        | -0.015        | 0.002       | -0.008       | 0.003      |       |
| rs1469249   | G             | 0.79         | 0.78        | 0.016         | 0.003       | 0.010        | 0.004      |       |
| rs162894    | T             | 0.33         | 0.33        | 0.013         | 0.002       | 0.001        | 0.003      |       |
| rs166835    | C             | 0.44         | 0.43        | 0.013         | 0.002       | 0.004        | 0.003      |       |
| rs198262    | C             | 0.04         | 0.04        | 0.030         | 0.006       | 0.006        | 0.007      |       |
| rs2068625   | T             | 0.30         | 0.32        | -0.016        | 0.002       | -0.011       | 0.003      |       |
| rs206965    | T             | 0.21         | 0.25        | 0.016         | 0.003       | 0.009        | 0.004      |       |
| rs2220599   | C             | 0.63         | 0.64        | -0.016        | 0.002       | 0.003        | 0.003      |       |
| rs2345941   | A             | 0.55         | 0.55        | 0.015         | 0.002       | 0.019        | 0.003      |       |
| rs2734849   | A             | 0.49         | 0.50        | -0.014        | 0.002       | -0.009       | 0.003      |       |
| rs2748985   | T             | 0.45         | 0.47        | -0.015        | 0.002       | 0.006        | 0.003      |       |
| rs35933007  | G             | 0.77         | 0.80        | -0.015        | 0.003       | -0.008       | 0.003      |       |
| rs3730399   | A             | 0.93         | 0.95        | 0.025         | 0.005       | 0.013        | 0.006      |       |
| rs3944151   | A             | 0.28         | 0.28        | 0.014         | 0.003       | 0.011        | 0.003      |       |

|            |   |      |      |        |       |        |       |  |
|------------|---|------|------|--------|-------|--------|-------|--|
| rs4702     | G | 0.44 | 0.41 | 0.012  | 0.002 | -0.003 | 0.003 |  |
| rs4977839  | G | 0.58 | 0.56 | -0.020 | 0.002 | -0.026 | 0.003 |  |
| rs55772938 | A | 0.70 | 0.70 | -0.015 | 0.002 | -0.014 | 0.003 |  |
| rs6129084  | A | 0.36 | 0.35 | -0.014 | 0.002 | -0.010 | 0.003 |  |
| rs6498759  | T | 0.31 | 0.31 | 0.013  | 0.002 | -0.002 | 0.003 |  |
| rs66643547 | C | 0.65 | 0.66 | -0.015 | 0.002 | -0.011 | 0.003 |  |
| rs6744254  | C | 0.47 | 0.50 | -0.016 | 0.002 | -0.016 | 0.003 |  |
| rs6774533  | C | 0.29 | 0.31 | -0.015 | 0.003 | -0.006 | 0.003 |  |
| rs6857629  | G | 0.76 | 0.77 | 0.015  | 0.003 | 0.009  | 0.003 |  |
| rs6935828  | C | 0.45 | 0.43 | -0.012 | 0.002 | -0.008 | 0.003 |  |
| rs7020477  | A | 0.73 | 0.73 | 0.014  | 0.003 | 0.000  | 0.003 |  |
| rs7209653  | T | 0.70 | 0.69 | 0.016  | 0.002 | 0.005  | 0.003 |  |
| rs7288455  | A | 0.44 | 0.40 | 0.013  | 0.002 | 0.013  | 0.003 |  |
| rs73578186 | C | 0.68 | 0.67 | 0.015  | 0.002 | 0.009  | 0.003 |  |
| rs78082503 | G | 0.79 | 0.81 | -0.015 | 0.003 | -0.001 | 0.003 |  |
| rs784256   | G | 0.19 | 0.17 | 0.019  | 0.003 | 0.012  | 0.004 |  |
| rs9372625  | G | 0.62 | 0.59 | -0.018 | 0.002 | -0.026 | 0.003 |  |
| rs9477970  | T | 0.81 | 0.85 | -0.016 | 0.003 | -0.014 | 0.004 |  |

**Supplementary Table 15. The information of cohorts used in the genome-wide association study for stroke from MEGASTROKE consortium.**

| <b>Cohort</b>     | <b>AS</b> | <b>AIS</b> | <b>LAS</b> | <b>CES</b> | <b>SVS</b> | <b>Controls</b> |
|-------------------|-----------|------------|------------|------------|------------|-----------------|
| CHARGE            | 4,348     | 3,028      |            | 602        |            | 80,613          |
| METASTROKE        | 10,307    | 10,307     | 1,817      | 1,859      | 1,349      | 19,326          |
| SIGN              | 7,743     | 7,743      | 1,253      | 2,135      | 1,534      | 17,970          |
| DECODE1           | 5,520     | 4,483      | 512        | 1,346      | 615        | 2,552,131       |
| EPIC-CVD          | 4,347     | 2,226      |            |            |            | 7,897           |
| Young Lacunar DNA | 1,403     | 1,268      |            |            | 1,012      | 970             |
| SIFAP             | 981       | 981        | 184        | 170        | 104        | 1,824           |
| INTERSTROKE EUR   | 911       | 826        | 188        | 208        | 243        | 863             |
| HVH1              | 681       | 577        | 62         | 92         | 175        | 1,331           |
| Glasgow           | 599       | 599        | 72         | 105        | 137        | 1,775           |
| CADISP            | 555       | 555        | 67         | 211        | 31         | 9,259           |
| Barcelona         | 520       | 520        | 119        | 215        |            | 315             |
| FINLAND           | 501       | 501        | 99         | 187        | 62         | 1,813           |
| SAHLSIS           | 298       | 298        |            | 35         | 85         | 596             |
| MDC               | 202       | 202        |            |            |            | 4,295           |
| HVH2              | 124       | 103        |            | 28         | 39         | 570             |
| ICH               | 1,545     |            |            |            |            | 1,481           |

AS, all-cause stroke; AIS, all-cause ischemic stroke; LAS, large-artery atherosclerotic stroke; CES, cardioembolic stroke; SVS, small-vessel stroke.



**Supplementary Table 16. The information of cohorts used in the genome-wide association study for intracerebral hemorrhage from ISGC consortium.**

| <b>Cohort</b>         | <b>Cases</b> | <b>Controls</b> |
|-----------------------|--------------|-----------------|
| GOCHA                 | 316          | 457             |
| GERFHS I, II          | 797          | 539             |
| ISGC European Centers | 482          | 485             |
| HM-ICH                | 109          | 79              |
| JUHSS                 | 131          | 163             |
| Lund Stroke Register  | 130          | 153             |
| VHH-ICH               | 112          | 90              |

**Supplementary Table 17. The information of cohorts used in the genome-wide association study for Alzheimer’s disease from IGAP consortium.**

| <b>Consortium</b> |           | <b>AD cases</b> | <b>Controls</b> |
|-------------------|-----------|-----------------|-----------------|
| ADGC              | ACT       | 532             | 1,571           |
|                   | ADC1      | 1,549           | 512             |
|                   | ADC2      | 727             | 156             |
|                   | ADC3      | 894             | 586             |
|                   | ADC4      | 304             | 377             |
|                   | ADC5      | 286             | 505             |
|                   | ADC6      | 213             | 338             |
|                   | ADNI      | 268             | 173             |
|                   | BIOCARD   | 6               | 112             |
|                   | CHAP      | 27              | 144             |
|                   | EAS       | 9               | 141             |
|                   | GenADA    | 666             | 712             |
|                   | MAYO      | 658             | 1,046           |
|                   | MIRAGE    | 491             | 738             |
|                   | MTC       | 256             | 189             |
|                   | NIALOAD   | 1,798           | 1,568           |
|                   | NBB       | 80              | 48              |
|                   | OHSU      | 132             | 153             |
|                   | PFIZER    | 696             | 762             |
|                   | RMAYO     | 13              | 233             |
|                   | ROSMAP    | 295             | 769             |
|                   | ROSMAP2   | 59              | 217             |
|                   | TARC1     | 323             | 181             |
|                   | TGEN2     | 668             | 365             |
|                   | UKS       | 596             | 170             |
|                   | UMCWRMSSM | 1,177           | 1,126           |
|                   | UPITT     | 1,255           | 829             |
| WASHU             | 339       | 187             |                 |
| WASHU2            | 38        | 94              |                 |
| WHICAP            | 73        | 560             |                 |
| CHARGE            | AGES      | 95              | 2,708           |
|                   | ASPS      | 277             | 169             |
|                   | CHS       | 450             | 1,702           |
|                   | FHS       | 330             | 3,910           |
|                   | ROTTERDAM | 985             | 4,985           |
| EADI              |           | 2,240           | 6,631           |
| GERAD             | MRC       | 1,008           | 873             |
|                   | ARUK      | 939             | 82              |
|                   | BONN      | 551             | 37              |

|        |           |        |        |
|--------|-----------|--------|--------|
|        | WASHU     | 423    | 156    |
|        | NIMH      | 127    | -      |
|        | UCL:PRION | 82     | -      |
|        | UCL:LASER | 47     | -      |
|        | 1958BC    | -      | 5,342  |
|        | KORA      | -      | 434    |
|        | HNR       | -      | 353    |
|        | MAYO1     | -      | -      |
| TOTALS |           | 21,982 | 41,944 |

**Supplementary Table 18. The information of cohorts used in the genome-wide association study for Parkinson's disease from PDGene consortium.**

| <b>Cohort</b> | <b>Cases</b> | <b>Controls</b> |
|---------------|--------------|-----------------|
| IPDGC-DC      | 604          | 4916            |
| IPDGC-FR      | 985          | 1984            |
| IPDGC-GE      | 667          | 937             |
| IPDGC-NE      | 744          | 2019            |
| IPDGC-NIA     | 937          | 1896            |
| IPDGC-UK      | 1705         | 5200            |
| 23andMe.v2    | 3261         | 29499           |
| 23andMe.v3    | 866          | 32538           |
| Ash Jewish    | 268          | 178             |
| HIHG          | 574          | 619             |
| NGRC          | 1956         | 1982            |
| PGPD          | 828          | 852             |
| CHARGE-CHS    | 107          | 3164            |
| CHARGE-FHS    | 60           | 3889            |
| CHARGE-RSI    | 146          | 5609            |
| Discovery     | 13708        | 95282           |
| IPDGC-FR      | 553          | 474             |
| IPDGC-GE      | 1044         | 871             |
| IPDGC-GK      | 944          | 877             |
| IPDGC-NIA     | 2407         | 2782            |
| IPDGC-UK      | 405          | 547             |
| Replication   | 5353         | 5551            |

## Reference

1. Willer CJ, Schmidt EM, Sengupta S, et al. Discovery and refinement of loci associated with lipid levels. *Nat. Genet.* 2013;45(11):1274-1283
2. Dupuis J, Langenberg C, Prokopenko I, et al. New genetic loci implicated in fasting glucose homeostasis and their impact on type 2 diabetes risk. *Nat. Genet.* 2010;42(2):105-16
3. Wheeler E, Leong A, Liu CT, et al. Impact of common genetic determinants of Hemoglobin A1c on type 2 diabetes risk and diagnosis in ancestrally diverse populations: A transethnic genome-wide meta-analysis. *PLoS Med.* 2017;14(9):e1002383
4. Walford GA, Gustafsson S, Rybin D, et al. Genome-wide association study of the modified stumvoll insulin sensitivity index identifies BCL2 and FAM19A2 as novel insulin sensitivity loci. *Diabetes* 2016;65(10):3200-11
5. Evangelou E, Warren HR, Mosen-Ansorena D, et al. Genetic analysis of over 1 million people identifies 535 new loci associated with blood pressure traits. *Nat. Genet.* 2018;50(10):1412-1425
6. Pulit SL, Stoneman C, Morris AP, et al. Meta-Analysis of genome-wide association studies for body fat distribution in 694 649 individuals of European ancestry. *Hum. Mol. Genet.* 2019;28(1):166-174
7. Liu M, Jiang Y, Wedow R, et al. Association studies of up to 1.2 million individuals yield new insights into the genetic etiology of tobacco and alcohol use. *Nat. Genet.* 2019;51(2):237-244
8. Doherty A, Smith-Byrne K, Ferreira T, et al. GWAS identifies 14 loci for device-measured physical activity and sleep duration. *Nat. Commun.* 2018;9(1):5257

**Supplementary Table 19. Summary data for the genetic association between television watching and outcomes.**

| <b>SNP<br/>CES</b> | <b>EA</b> | <b>EAF</b> | <b>GX</b> | <b>GX_SE</b> | <b>GY</b> | <b>GY_SE</b> |
|--------------------|-----------|------------|-----------|--------------|-----------|--------------|
| rs10041724         | T         | 0.81       | 0.018     | 0.003        | 0.024     | 0.025        |
| rs10054327         | G         | 0.58       | 0.017     | 0.002        | -0.021    | 0.019        |
| rs10145592         | C         | 0.41       | -0.015    | 0.002        | -0.010    | 0.020        |
| rs10189857         | A         | 0.57       | -0.020    | 0.002        | 0.015     | 0.019        |
| rs1022785          | G         | 0.14       | 0.018     | 0.003        | 0.032     | 0.028        |
| rs10234444         | G         | 0.82       | 0.016     | 0.003        | 0.026     | 0.026        |
| rs10246289         | A         | 0.11       | 0.019     | 0.003        | 0.025     | 0.030        |
| rs1031423          | T         | 0.22       | -0.019    | 0.003        | 0.073     | 0.024        |
| rs10427502         | G         | 0.62       | 0.014     | 0.002        | -0.019    | 0.020        |
| rs10737620         | T         | 0.27       | 0.014     | 0.002        | -0.019    | 0.022        |
| rs10771746         | C         | 0.72       | -0.014    | 0.002        | -0.023    | 0.021        |
| rs10772643         | C         | 0.11       | 0.025     | 0.003        | -0.018    | 0.031        |
| rs10876864         | G         | 0.43       | -0.013    | 0.002        | -0.013    | 0.019        |
| rs10890123         | C         | 0.77       | 0.014     | 0.003        | 0.006     | 0.024        |
| rs10932837         | C         | 0.49       | -0.013    | 0.002        | -0.026    | 0.019        |
| rs10940659         | A         | 0.53       | -0.013    | 0.002        | 0.010     | 0.019        |
| rs10994943         | T         | 0.58       | 0.013     | 0.002        | -0.018    | 0.019        |
| rs11020045         | A         | 0.67       | -0.013    | 0.002        | -0.060    | 0.020        |
| rs11130793         | C         | 0.60       | 0.013     | 0.002        | 0.015     | 0.020        |
| rs11201422         | T         | 0.67       | 0.013     | 0.002        | 0.013     | 0.021        |
| rs11218575         | C         | 0.57       | 0.015     | 0.002        | 0.029     | 0.020        |
| rs11245482         | T         | 0.61       | -0.013    | 0.002        | -0.014    | 0.019        |
| rs114328297        | T         | 0.78       | 0.014     | 0.003        | -0.017    | 0.025        |
| rs114600294        | G         | 0.79       | -0.016    | 0.003        | 0.039     | 0.031        |
| rs1156541          | C         | 0.22       | 0.014     | 0.003        | 0.025     | 0.023        |
| rs11654952         | T         | 0.86       | -0.017    | 0.003        | -0.044    | 0.029        |
| rs11657730         | C         | 0.64       | 0.013     | 0.002        | -0.026    | 0.023        |
| rs11689199         | A         | 0.60       | 0.018     | 0.002        | -0.026    | 0.020        |
| rs11714337         | G         | 0.57       | 0.014     | 0.002        | -0.002    | 0.020        |
| rs11763734         | A         | 0.51       | -0.012    | 0.002        | 0.009     | 0.018        |
| rs11810109         | A         | 0.70       | 0.016     | 0.002        | 0.009     | 0.021        |
| rs12105701         | C         | 0.40       | -0.013    | 0.002        | -0.024    | 0.020        |
| rs12272012         | G         | 0.96       | -0.030    | 0.005        | 0.082     | 0.053        |
| rs12289262         | C         | 0.73       | -0.014    | 0.002        | 0.012     | 0.022        |
| rs1243182          | C         | 0.69       | -0.019    | 0.002        | 0.022     | 0.021        |
| rs12476388         | C         | 0.71       | 0.013     | 0.002        | -0.021    | 0.022        |
| rs12491503         | G         | 0.67       | -0.014    | 0.002        | -0.020    | 0.021        |
| rs12541615         | T         | 0.82       | -0.018    | 0.003        | -0.022    | 0.025        |
| rs12554512         | T         | 0.58       | 0.021     | 0.002        | 0.005     | 0.020        |
| rs12725114         | G         | 0.80       | 0.015     | 0.003        | -0.022    | 0.024        |
| rs1278847          | C         | 0.69       | 0.016     | 0.002        | -0.008    | 0.022        |
| rs13029509         | G         | 0.52       | -0.018    | 0.002        | 0.014     | 0.019        |

|             |   |      |        |       |        |       |
|-------------|---|------|--------|-------|--------|-------|
| rs13107325  | C | 0.93 | -0.029 | 0.004 | 0.030  | 0.044 |
| rs138256022 | C | 0.96 | -0.031 | 0.006 | 0.054  | 0.057 |
| rs1421334   | A | 0.45 | 0.017  | 0.002 | 0.014  | 0.020 |
| rs1451533   | G | 0.72 | -0.016 | 0.002 | -0.001 | 0.022 |
| rs17207890  | G | 0.66 | 0.016  | 0.002 | 0.007  | 0.020 |
| rs17379561  | A | 0.86 | -0.025 | 0.003 | -0.006 | 0.027 |
| rs17512836  | T | 0.97 | 0.042  | 0.007 | 0.040  | 0.061 |
| rs17727474  | C | 0.83 | 0.018  | 0.003 | 0.004  | 0.025 |
| rs17789218  | T | 0.76 | 0.019  | 0.003 | -0.046 | 0.024 |
| rs2034768   | A | 0.49 | 0.015  | 0.002 | 0.003  | 0.019 |
| rs2045147   | A | 0.45 | 0.013  | 0.002 | 0.002  | 0.019 |
| rs2073869   | C | 0.83 | 0.019  | 0.003 | -0.027 | 0.025 |
| rs2092829   | G | 0.71 | 0.014  | 0.002 | -0.036 | 0.021 |
| rs2164744   | T | 0.64 | -0.013 | 0.002 | 0.014  | 0.020 |
| rs2173650   | G | 0.85 | 0.018  | 0.003 | -0.032 | 0.027 |
| rs2184364   | A | 0.78 | 0.016  | 0.003 | -0.037 | 0.026 |
| rs2447098   | C | 0.48 | -0.015 | 0.002 | 0.010  | 0.019 |
| rs2460      | G | 0.74 | -0.015 | 0.002 | 0.009  | 0.023 |
| rs2584597   | T | 0.66 | 0.015  | 0.002 | 0.023  | 0.022 |
| rs2616830   | G | 0.46 | 0.016  | 0.002 | -0.002 | 0.019 |
| rs262890    | A | 0.70 | -0.019 | 0.002 | -0.034 | 0.021 |
| rs2717559   | A | 0.56 | 0.012  | 0.002 | 0.012  | 0.020 |
| rs2787374   | T | 0.41 | 0.012  | 0.002 | 0.038  | 0.019 |
| rs303753    | G | 0.65 | -0.014 | 0.002 | -0.028 | 0.020 |
| rs34864022  | A | 0.93 | -0.026 | 0.004 | -0.019 | 0.037 |
| rs35574015  | T | 0.71 | -0.013 | 0.002 | 0.036  | 0.021 |
| rs374722    | G | 0.15 | 0.024  | 0.003 | -0.009 | 0.027 |
| rs3754970   | T | 0.50 | -0.015 | 0.002 | 0.042  | 0.019 |
| rs3796386   | G | 0.57 | -0.026 | 0.002 | -0.012 | 0.020 |
| rs405797    | T | 0.25 | -0.015 | 0.003 | -0.020 | 0.023 |
| rs42210     | G | 0.29 | -0.014 | 0.002 | -0.017 | 0.023 |
| rs4334769   | G | 0.47 | 0.012  | 0.002 | 0.015  | 0.019 |
| rs4382592   | T | 0.30 | 0.014  | 0.002 | 0.023  | 0.021 |
| rs4523073   | A | 0.59 | -0.014 | 0.002 | 0.009  | 0.020 |
| rs4577309   | A | 0.47 | 0.016  | 0.002 | -0.022 | 0.019 |
| rs4675246   | G | 0.80 | -0.015 | 0.003 | -0.015 | 0.024 |
| rs4775373   | T | 0.36 | 0.013  | 0.002 | 0.021  | 0.020 |
| rs4845364   | A | 0.50 | -0.015 | 0.002 | 0.005  | 0.019 |
| rs4937842   | G | 0.63 | -0.013 | 0.002 | -0.026 | 0.021 |
| rs4973576   | C | 0.30 | -0.015 | 0.002 | 0.023  | 0.021 |
| rs55700114  | G | 0.71 | -0.014 | 0.002 | -0.006 | 0.021 |
| rs55909997  | G | 0.65 | -0.014 | 0.002 | 0.008  | 0.020 |
| rs56103247  | C | 0.94 | 0.030  | 0.005 | 0.084  | 0.051 |
| rs56858768  | G | 0.70 | -0.015 | 0.002 | 0.012  | 0.021 |
| rs57585211  | T | 0.83 | -0.017 | 0.003 | -0.026 | 0.026 |
| rs6131281   | C | 0.60 | 0.016  | 0.002 | -0.061 | 0.019 |
| rs6141814   | C | 0.61 | -0.014 | 0.002 | 0.034  | 0.020 |

|            |   |      |        |       |        |       |
|------------|---|------|--------|-------|--------|-------|
| rs62379379 | G | 0.93 | -0.026 | 0.004 | -0.027 | 0.037 |
| rs62641636 | A | 0.69 | 0.014  | 0.002 | 0.033  | 0.022 |
| rs6472942  | T | 0.57 | -0.013 | 0.002 | 0.005  | 0.019 |
| rs6673341  | T | 0.47 | -0.015 | 0.002 | 0.023  | 0.019 |
| rs66852340 | C | 0.78 | -0.018 | 0.003 | 0.008  | 0.024 |
| rs6721975  | T | 0.23 | -0.017 | 0.003 | -0.101 | 0.024 |
| rs6797840  | A | 0.46 | -0.016 | 0.002 | 0.004  | 0.020 |
| rs6825241  | C | 0.54 | -0.017 | 0.002 | -0.005 | 0.019 |
| rs6850494  | A | 0.62 | -0.014 | 0.002 | -0.034 | 0.020 |
| rs6905544  | A | 0.40 | -0.019 | 0.002 | 0.013  | 0.019 |
| rs6973656  | A | 0.60 | -0.013 | 0.002 | -0.068 | 0.019 |
| rs6996198  | C | 0.84 | -0.016 | 0.003 | -0.010 | 0.027 |
| rs7089973  | C | 0.62 | -0.013 | 0.002 | 0.022  | 0.020 |
| rs7157001  | A | 0.74 | -0.014 | 0.002 | 0.023  | 0.025 |
| rs71658797 | T | 0.88 | -0.020 | 0.003 | 0.019  | 0.031 |
| rs7184800  | G | 0.70 | 0.017  | 0.002 | -0.005 | 0.021 |
| rs7189927  | T | 0.36 | 0.015  | 0.002 | 0.016  | 0.021 |
| rs7248205  | C | 0.40 | 0.014  | 0.002 | -0.061 | 0.021 |
| rs72671494 | T | 0.86 | -0.017 | 0.003 | 0.007  | 0.030 |
| rs72781699 | G | 0.80 | -0.019 | 0.003 | 0.000  | 0.024 |
| rs72828890 | C | 0.87 | 0.019  | 0.003 | -0.007 | 0.031 |
| rs72834698 | G | 0.86 | 0.023  | 0.003 | -0.036 | 0.028 |
| rs749671   | G | 0.63 | 0.016  | 0.002 | -0.019 | 0.020 |
| rs7564130  | T | 0.64 | -0.015 | 0.002 | 0.008  | 0.020 |
| rs7693082  | G | 0.30 | 0.015  | 0.002 | -0.014 | 0.020 |
| rs7693703  | G | 0.91 | 0.023  | 0.004 | 0.077  | 0.035 |
| rs7700107  | A | 0.86 | -0.021 | 0.003 | -0.013 | 0.029 |
| rs7716447  | A | 0.64 | -0.013 | 0.002 | 0.011  | 0.024 |
| rs77215114 | A | 0.93 | 0.024  | 0.004 | 0.042  | 0.039 |
| rs7991062  | C | 0.66 | -0.018 | 0.002 | 0.008  | 0.021 |
| rs801733   | A | 0.64 | 0.017  | 0.002 | 0.008  | 0.020 |
| rs8043253  | C | 0.57 | -0.012 | 0.002 | -0.015 | 0.019 |
| rs8756     | C | 0.48 | -0.013 | 0.002 | 0.001  | 0.020 |
| rs9471333  | C | 0.45 | 0.013  | 0.002 | -0.010 | 0.019 |
| rs9563168  | G | 0.79 | 0.018  | 0.003 | -0.005 | 0.023 |
| rs9569734  | A | 0.84 | 0.019  | 0.003 | 0.017  | 0.029 |
| rs9718104  | T | 0.94 | -0.041 | 0.005 | -0.048 | 0.050 |
| rs973734   | C | 0.15 | 0.017  | 0.003 | 0.007  | 0.027 |
| rs9834970  | T | 0.50 | 0.013  | 0.002 | 0.012  | 0.019 |
| rs984409   | G | 0.36 | -0.015 | 0.002 | 0.030  | 0.020 |
| rs9867121  | C | 0.82 | 0.019  | 0.003 | -0.030 | 0.026 |
| rs9902312  | T | 0.68 | 0.015  | 0.002 | 0.003  | 0.020 |
| rs9964724  | C | 0.32 | 0.018  | 0.002 | -0.015 | 0.020 |
| <b>LAS</b> |   |      |        |       |        |       |
| rs10041724 | T | 0.81 | 0.018  | 0.003 | 0.021  | 0.032 |
| rs10054327 | G | 0.58 | 0.017  | 0.002 | -0.009 | 0.025 |
| rs10145592 | C | 0.41 | -0.015 | 0.002 | 0.015  | 0.025 |



|             |   |      |        |       |        |       |
|-------------|---|------|--------|-------|--------|-------|
| rs10189857  | A | 0.57 | -0.020 | 0.002 | 0.013  | 0.025 |
| rs1022785   | G | 0.14 | 0.018  | 0.003 | 0.057  | 0.035 |
| rs10234444  | G | 0.82 | 0.016  | 0.003 | 0.074  | 0.034 |
| rs10246289  | A | 0.11 | 0.019  | 0.003 | 0.087  | 0.038 |
| rs1031423   | T | 0.22 | -0.019 | 0.003 | 0.049  | 0.030 |
| rs10427502  | G | 0.62 | 0.014  | 0.002 | 0.056  | 0.026 |
| rs10737620  | T | 0.27 | 0.014  | 0.002 | -0.019 | 0.028 |
| rs10771746  | C | 0.72 | -0.014 | 0.002 | 0.028  | 0.027 |
| rs10772643  | C | 0.11 | 0.025  | 0.003 | 0.080  | 0.039 |
| rs10876864  | G | 0.43 | -0.013 | 0.002 | -0.021 | 0.025 |
| rs10890123  | C | 0.77 | 0.014  | 0.003 | -0.023 | 0.030 |
| rs10932837  | C | 0.49 | -0.013 | 0.002 | 0.014  | 0.025 |
| rs10940659  | A | 0.53 | -0.013 | 0.002 | 0.023  | 0.024 |
| rs10994943  | T | 0.58 | 0.013  | 0.002 | 0.037  | 0.025 |
| rs11020045  | A | 0.67 | -0.013 | 0.002 | -0.092 | 0.026 |
| rs11130793  | C | 0.60 | 0.013  | 0.002 | 0.012  | 0.026 |
| rs11201422  | T | 0.67 | 0.013  | 0.002 | 0.028  | 0.029 |
| rs11218575  | C | 0.57 | 0.015  | 0.002 | -0.040 | 0.026 |
| rs11245482  | T | 0.61 | -0.013 | 0.002 | -0.024 | 0.025 |
| rs114328297 | T | 0.78 | 0.014  | 0.003 | -0.017 | 0.032 |
| rs114600294 | G | 0.79 | -0.016 | 0.003 | -0.011 | 0.040 |
| rs1156541   | C | 0.22 | 0.014  | 0.003 | -0.041 | 0.030 |
| rs11654952  | T | 0.86 | -0.017 | 0.003 | -0.107 | 0.037 |
| rs11657730  | C | 0.64 | 0.013  | 0.002 | -0.015 | 0.030 |
| rs11689199  | A | 0.60 | 0.018  | 0.002 | 0.003  | 0.026 |
| rs11714337  | G | 0.57 | 0.014  | 0.002 | 0.024  | 0.026 |
| rs11763734  | A | 0.51 | -0.012 | 0.002 | -0.030 | 0.025 |
| rs11810109  | A | 0.70 | 0.016  | 0.002 | 0.036  | 0.027 |
| rs12105701  | C | 0.40 | -0.013 | 0.002 | 0.002  | 0.027 |
| rs12272012  | G | 0.96 | -0.030 | 0.005 | -0.099 | 0.061 |
| rs12289262  | C | 0.73 | -0.014 | 0.002 | -0.008 | 0.029 |
| rs1243182   | C | 0.69 | -0.019 | 0.002 | 0.011  | 0.027 |
| rs12476388  | C | 0.71 | 0.013  | 0.002 | -0.018 | 0.027 |
| rs12491503  | G | 0.67 | -0.014 | 0.002 | 0.009  | 0.027 |
| rs12541615  | T | 0.82 | -0.018 | 0.003 | 0.018  | 0.031 |
| rs12554512  | T | 0.58 | 0.021  | 0.002 | 0.002  | 0.026 |
| rs12725114  | G | 0.80 | 0.015  | 0.003 | -0.010 | 0.030 |
| rs1278847   | C | 0.69 | 0.016  | 0.002 | -0.008 | 0.029 |
| rs13029509  | G | 0.52 | -0.018 | 0.002 | -0.058 | 0.025 |
| rs13107325  | C | 0.93 | -0.029 | 0.004 | -0.021 | 0.053 |
| rs138256022 | C | 0.96 | -0.031 | 0.006 | 0.010  | 0.072 |
| rs1421334   | A | 0.45 | 0.017  | 0.002 | -0.051 | 0.026 |
| rs1451533   | G | 0.72 | -0.016 | 0.002 | 0.009  | 0.029 |
| rs17207890  | G | 0.66 | 0.016  | 0.002 | 0.017  | 0.026 |
| rs17379561  | A | 0.86 | -0.025 | 0.003 | -0.006 | 0.034 |
| rs17512836  | T | 0.97 | 0.042  | 0.007 | 0.103  | 0.087 |
| rs17727474  | C | 0.83 | 0.018  | 0.003 | -0.018 | 0.033 |

|            |   |      |        |       |        |       |
|------------|---|------|--------|-------|--------|-------|
| rs17789218 | T | 0.76 | 0.019  | 0.003 | -0.041 | 0.031 |
| rs2034768  | A | 0.49 | 0.015  | 0.002 | -0.038 | 0.025 |
| rs2045147  | A | 0.45 | 0.013  | 0.002 | -0.010 | 0.025 |
| rs2073869  | C | 0.83 | 0.019  | 0.003 | 0.007  | 0.032 |
| rs2092829  | G | 0.71 | 0.014  | 0.002 | -0.027 | 0.027 |
| rs2164744  | T | 0.64 | -0.013 | 0.002 | -0.001 | 0.025 |
| rs2173650  | G | 0.85 | 0.018  | 0.003 | -0.051 | 0.035 |
| rs2184364  | A | 0.78 | 0.016  | 0.003 | 0.002  | 0.032 |
| rs2447098  | C | 0.48 | -0.015 | 0.002 | 0.017  | 0.025 |
| rs2460     | G | 0.74 | -0.015 | 0.002 | -0.044 | 0.029 |
| rs2584597  | T | 0.66 | 0.015  | 0.002 | 0.005  | 0.028 |
| rs2616830  | G | 0.46 | 0.016  | 0.002 | -0.044 | 0.025 |
| rs262890   | A | 0.70 | -0.019 | 0.002 | -0.004 | 0.030 |
| rs2717559  | A | 0.56 | 0.012  | 0.002 | -0.052 | 0.027 |
| rs2787374  | T | 0.41 | 0.012  | 0.002 | 0.037  | 0.025 |
| rs303753   | G | 0.65 | -0.014 | 0.002 | 0.005  | 0.026 |
| rs34864022 | A | 0.93 | -0.026 | 0.004 | -0.015 | 0.049 |
| rs35574015 | T | 0.71 | -0.013 | 0.002 | -0.035 | 0.027 |
| rs374722   | G | 0.15 | 0.024  | 0.003 | 0.040  | 0.034 |
| rs3754970  | T | 0.50 | -0.015 | 0.002 | -0.025 | 0.025 |
| rs3796386  | G | 0.57 | -0.026 | 0.002 | -0.058 | 0.026 |
| rs405797   | T | 0.25 | -0.015 | 0.003 | -0.046 | 0.030 |
| rs42210    | G | 0.29 | -0.014 | 0.002 | 0.012  | 0.029 |
| rs4334769  | G | 0.47 | 0.012  | 0.002 | -0.017 | 0.026 |
| rs4382592  | T | 0.30 | 0.014  | 0.002 | 0.010  | 0.027 |
| rs4523073  | A | 0.59 | -0.014 | 0.002 | -0.037 | 0.026 |
| rs4577309  | A | 0.47 | 0.016  | 0.002 | 0.020  | 0.025 |
| rs4675246  | G | 0.80 | -0.015 | 0.003 | 0.014  | 0.031 |
| rs4775373  | T | 0.36 | 0.013  | 0.002 | 0.003  | 0.026 |
| rs4845364  | A | 0.50 | -0.015 | 0.002 | 0.010  | 0.024 |
| rs4937842  | G | 0.63 | -0.013 | 0.002 | 0.037  | 0.028 |
| rs4973576  | C | 0.30 | -0.015 | 0.002 | 0.004  | 0.027 |
| rs55700114 | G | 0.71 | -0.014 | 0.002 | -0.006 | 0.026 |
| rs55909997 | G | 0.65 | -0.014 | 0.002 | -0.014 | 0.026 |
| rs56103247 | C | 0.94 | 0.030  | 0.005 | 0.019  | 0.070 |
| rs56858768 | G | 0.70 | -0.015 | 0.002 | -0.036 | 0.028 |
| rs57585211 | T | 0.83 | -0.017 | 0.003 | -0.012 | 0.034 |
| rs6131281  | C | 0.60 | 0.016  | 0.002 | -0.013 | 0.025 |
| rs6141814  | C | 0.61 | -0.014 | 0.002 | -0.007 | 0.026 |
| rs62379379 | G | 0.93 | -0.026 | 0.004 | -0.073 | 0.048 |
| rs62641636 | A | 0.69 | 0.014  | 0.002 | 0.022  | 0.027 |
| rs6472942  | T | 0.57 | -0.013 | 0.002 | 0.008  | 0.025 |
| rs6673341  | T | 0.47 | -0.015 | 0.002 | -0.029 | 0.025 |
| rs66852340 | C | 0.78 | -0.018 | 0.003 | -0.043 | 0.030 |
| rs6721975  | T | 0.23 | -0.017 | 0.003 | 0.033  | 0.031 |
| rs6797840  | A | 0.46 | -0.016 | 0.002 | -0.033 | 0.025 |
| rs6825241  | C | 0.54 | -0.017 | 0.002 | -0.014 | 0.025 |

|            |   |      |        |       |        |       |
|------------|---|------|--------|-------|--------|-------|
| rs6850494  | A | 0.62 | -0.014 | 0.002 | -0.037 | 0.025 |
| rs6905544  | A | 0.40 | -0.019 | 0.002 | 0.007  | 0.025 |
| rs6973656  | A | 0.60 | -0.013 | 0.002 | 0.002  | 0.025 |
| rs6996198  | C | 0.84 | -0.016 | 0.003 | 0.003  | 0.034 |
| rs7089973  | C | 0.62 | -0.013 | 0.002 | 0.010  | 0.026 |
| rs7157001  | A | 0.74 | -0.014 | 0.002 | 0.055  | 0.034 |
| rs71658797 | T | 0.88 | -0.020 | 0.003 | 0.007  | 0.040 |
| rs7184800  | G | 0.70 | 0.017  | 0.002 | -0.002 | 0.027 |
| rs7189927  | T | 0.36 | 0.015  | 0.002 | -0.012 | 0.026 |
| rs7248205  | C | 0.40 | 0.014  | 0.002 | -0.068 | 0.027 |
| rs72671494 | T | 0.86 | -0.017 | 0.003 | -0.016 | 0.038 |
| rs72781699 | G | 0.80 | -0.019 | 0.003 | -0.053 | 0.030 |
| rs72828890 | C | 0.87 | 0.019  | 0.003 | -0.056 | 0.040 |
| rs72834698 | G | 0.86 | 0.023  | 0.003 | -0.022 | 0.037 |
| rs749671   | G | 0.63 | 0.016  | 0.002 | 0.013  | 0.027 |
| rs7564130  | T | 0.64 | -0.015 | 0.002 | 0.007  | 0.026 |
| rs7693082  | G | 0.30 | 0.015  | 0.002 | -0.055 | 0.028 |
| rs7693703  | G | 0.91 | 0.023  | 0.004 | -0.042 | 0.043 |
| rs7700107  | A | 0.86 | -0.021 | 0.003 | -0.053 | 0.036 |
| rs7716447  | A | 0.64 | -0.013 | 0.002 | 0.046  | 0.031 |
| rs77215114 | A | 0.93 | 0.024  | 0.004 | -0.054 | 0.051 |
| rs7991062  | C | 0.66 | -0.018 | 0.002 | 0.024  | 0.027 |
| rs801733   | A | 0.64 | 0.017  | 0.002 | -0.002 | 0.026 |
| rs8043253  | C | 0.57 | -0.012 | 0.002 | -0.022 | 0.025 |
| rs8756     | C | 0.48 | -0.013 | 0.002 | -0.066 | 0.027 |
| rs9471333  | C | 0.45 | 0.013  | 0.002 | 0.006  | 0.025 |
| rs9563168  | G | 0.79 | 0.018  | 0.003 | 0.011  | 0.030 |
| rs9569734  | A | 0.84 | 0.019  | 0.003 | -0.029 | 0.036 |
| rs9718104  | T | 0.94 | -0.041 | 0.005 | -0.210 | 0.064 |
| rs973734   | C | 0.15 | 0.017  | 0.003 | 0.020  | 0.035 |
| rs9834970  | T | 0.50 | 0.013  | 0.002 | 0.003  | 0.025 |
| rs984409   | G | 0.36 | -0.015 | 0.002 | -0.039 | 0.026 |
| rs9867121  | C | 0.82 | 0.019  | 0.003 | -0.043 | 0.032 |
| rs9902312  | T | 0.68 | 0.015  | 0.002 | 0.020  | 0.026 |
| rs9964724  | C | 0.32 | 0.018  | 0.002 | 0.013  | 0.027 |
| <b>ICH</b> |   |      |        |       |        |       |
| rs10041724 | T | 0.81 | 0.018  | 0.003 | 0.205  | 0.064 |
| rs10189857 | A | 0.57 | -0.020 | 0.002 | -0.163 | 0.052 |
| rs6141814  | C | 0.61 | -0.014 | 0.002 | 0.123  | 0.053 |
| rs11763734 | A | 0.51 | -0.012 | 0.002 | -0.113 | 0.051 |
| rs255292   | C | 0.40 | -0.012 | 0.002 | -0.108 | 0.052 |
| rs12272012 | G | 0.96 | -0.030 | 0.005 | 0.274  | 0.134 |
| rs10427502 | G | 0.62 | 0.014  | 0.002 | -0.109 | 0.054 |
| rs17727474 | C | 0.83 | 0.018  | 0.003 | -0.129 | 0.067 |
| rs6124476  | T | 0.59 | 0.012  | 0.002 | 0.099  | 0.052 |
| rs6996198  | C | 0.84 | -0.016 | 0.003 | -0.128 | 0.069 |
| rs2460     | G | 0.74 | -0.015 | 0.002 | -0.109 | 0.059 |

|             |   |      |        |       |        |       |
|-------------|---|------|--------|-------|--------|-------|
| rs11201422  | T | 0.67 | 0.013  | 0.002 | -0.094 | 0.055 |
| rs262890    | A | 0.70 | -0.019 | 0.002 | -0.098 | 0.058 |
| rs11125515  | C | 0.73 | -0.014 | 0.002 | -0.095 | 0.058 |
| rs35574015  | T | 0.71 | -0.013 | 0.002 | 0.084  | 0.057 |
| rs11179838  | C | 0.64 | 0.013  | 0.002 | -0.080 | 0.054 |
| rs7788008   | G | 0.57 | 0.013  | 0.002 | -0.075 | 0.051 |
| rs3796386   | G | 0.57 | -0.026 | 0.002 | -0.076 | 0.052 |
| rs55700114  | G | 0.71 | -0.014 | 0.002 | -0.080 | 0.055 |
| rs328277    | C | 0.40 | 0.012  | 0.002 | -0.074 | 0.052 |
| rs17207890  | G | 0.66 | 0.016  | 0.002 | -0.072 | 0.053 |
| rs12491503  | G | 0.67 | -0.014 | 0.002 | -0.070 | 0.054 |
| rs12632778  | T | 0.95 | -0.028 | 0.005 | 0.162  | 0.124 |
| rs7700107   | A | 0.86 | -0.021 | 0.003 | 0.093  | 0.072 |
| rs2787374   | T | 0.41 | 0.012  | 0.002 | 0.067  | 0.052 |
| rs9563168   | G | 0.79 | 0.018  | 0.003 | 0.080  | 0.062 |
| rs114328297 | T | 0.78 | 0.014  | 0.003 | -0.082 | 0.065 |
| rs6905544   | A | 0.40 | -0.019 | 0.002 | -0.066 | 0.052 |
| rs6973656   | A | 0.60 | -0.013 | 0.002 | -0.064 | 0.052 |
| rs4334769   | G | 0.47 | 0.012  | 0.002 | -0.059 | 0.052 |
| rs6031440   | A | 0.40 | 0.012  | 0.002 | -0.060 | 0.053 |
| rs7693082   | G | 0.30 | 0.015  | 0.002 | 0.061  | 0.055 |
| rs10940659  | A | 0.53 | -0.013 | 0.002 | -0.057 | 0.052 |
| rs7564130   | T | 0.64 | -0.015 | 0.002 | -0.057 | 0.053 |
| rs11689199  | A | 0.60 | 0.018  | 0.002 | 0.056  | 0.052 |
| rs10739499  | C | 0.34 | 0.014  | 0.002 | 0.057  | 0.055 |
| rs66852340  | C | 0.78 | -0.018 | 0.003 | -0.064 | 0.063 |
| rs2173650   | G | 0.85 | 0.018  | 0.003 | -0.072 | 0.073 |
| rs17512836  | T | 0.97 | 0.042  | 0.007 | 0.150  | 0.155 |
| rs13029509  | G | 0.52 | -0.018 | 0.002 | 0.050  | 0.052 |
| rs10947452  | T | 0.35 | 0.014  | 0.002 | 0.052  | 0.055 |
| rs2336895   | G | 0.36 | 0.012  | 0.002 | 0.049  | 0.054 |
| rs10791546  | C | 0.59 | 0.012  | 0.002 | 0.046  | 0.052 |
| rs10054327  | G | 0.58 | 0.017  | 0.002 | -0.044 | 0.051 |
| rs17379561  | A | 0.86 | -0.025 | 0.003 | 0.063  | 0.075 |
| rs11714337  | G | 0.57 | 0.014  | 0.002 | -0.044 | 0.052 |
| rs2291681   | G | 0.58 | 0.013  | 0.002 | 0.044  | 0.053 |
| rs78394231  | T | 0.90 | -0.021 | 0.004 | -0.069 | 0.086 |
| rs9834970   | T | 0.50 | 0.013  | 0.002 | 0.042  | 0.052 |
| rs8043253   | C | 0.57 | -0.012 | 0.002 | 0.042  | 0.052 |
| rs11810109  | A | 0.70 | 0.016  | 0.002 | 0.045  | 0.057 |
| rs1352890   | C | 0.48 | -0.012 | 0.002 | 0.041  | 0.052 |
| rs10145592  | C | 0.41 | -0.015 | 0.002 | -0.041 | 0.053 |
| rs263771    | C | 0.77 | -0.017 | 0.003 | 0.048  | 0.062 |
| rs71658797  | T | 0.88 | -0.020 | 0.003 | -0.065 | 0.084 |
| rs12342024  | G | 0.89 | -0.021 | 0.003 | 0.066  | 0.085 |
| rs7089973   | C | 0.62 | -0.013 | 0.002 | -0.041 | 0.054 |
| rs9471333   | C | 0.45 | 0.013  | 0.002 | 0.039  | 0.051 |

|             |   |      |        |       |        |       |
|-------------|---|------|--------|-------|--------|-------|
| rs9528023   | C | 0.72 | 0.013  | 0.002 | 0.043  | 0.058 |
| rs4845364   | A | 0.50 | -0.015 | 0.002 | -0.038 | 0.052 |
| rs62379379  | G | 0.93 | -0.026 | 0.004 | -0.071 | 0.101 |
| rs749671    | G | 0.63 | 0.016  | 0.002 | 0.036  | 0.052 |
| rs7609      | A | 0.23 | 0.015  | 0.003 | -0.042 | 0.062 |
| rs62332760  | G | 0.61 | -0.014 | 0.002 | -0.036 | 0.054 |
| rs10246289  | A | 0.11 | 0.019  | 0.003 | 0.054  | 0.080 |
| rs12725114  | G | 0.80 | 0.015  | 0.003 | -0.043 | 0.063 |
| rs2616830   | G | 0.46 | 0.016  | 0.002 | 0.033  | 0.050 |
| rs801733    | A | 0.64 | 0.017  | 0.002 | 0.034  | 0.054 |
| rs10890123  | C | 0.77 | 0.014  | 0.003 | 0.040  | 0.063 |
| rs4577309   | A | 0.47 | 0.016  | 0.002 | -0.031 | 0.051 |
| rs72781699  | G | 0.80 | -0.019 | 0.003 | 0.039  | 0.064 |
| rs12105701  | C | 0.40 | -0.013 | 0.002 | -0.032 | 0.052 |
| rs1156541   | C | 0.22 | 0.014  | 0.003 | 0.036  | 0.061 |
| rs2034768   | A | 0.49 | 0.015  | 0.002 | 0.030  | 0.051 |
| rs12476388  | C | 0.71 | 0.013  | 0.002 | 0.033  | 0.058 |
| rs374722    | G | 0.15 | 0.024  | 0.003 | 0.039  | 0.071 |
| rs1022785   | G | 0.14 | 0.018  | 0.003 | 0.038  | 0.073 |
| rs6797840   | A | 0.46 | -0.016 | 0.002 | -0.027 | 0.052 |
| rs77215114  | A | 0.93 | 0.024  | 0.004 | 0.052  | 0.101 |
| rs984409    | G | 0.36 | -0.015 | 0.002 | 0.025  | 0.053 |
| rs1243182   | C | 0.69 | -0.019 | 0.002 | 0.024  | 0.054 |
| rs12289262  | C | 0.73 | -0.014 | 0.002 | -0.025 | 0.058 |
| rs34864022  | A | 0.93 | -0.026 | 0.004 | 0.044  | 0.111 |
| rs11245482  | T | 0.61 | -0.013 | 0.002 | 0.021  | 0.053 |
| rs973734    | C | 0.15 | 0.017  | 0.003 | -0.027 | 0.072 |
| rs11130793  | C | 0.60 | 0.013  | 0.002 | 0.020  | 0.053 |
| rs2694151   | C | 0.06 | 0.026  | 0.005 | -0.040 | 0.109 |
| rs112632642 | G | 0.93 | -0.024 | 0.004 | 0.038  | 0.106 |
| rs10737620  | T | 0.27 | 0.014  | 0.002 | -0.020 | 0.057 |
| rs10771746  | C | 0.72 | -0.014 | 0.002 | -0.019 | 0.057 |
| rs10057545  | G | 0.56 | -0.014 | 0.002 | -0.016 | 0.051 |
| rs56858768  | G | 0.70 | -0.015 | 0.002 | -0.018 | 0.057 |
| rs7184800   | G | 0.70 | 0.017  | 0.002 | 0.017  | 0.055 |
| rs2447098   | C | 0.48 | -0.015 | 0.002 | 0.016  | 0.053 |
| rs11218575  | C | 0.57 | 0.015  | 0.002 | -0.016 | 0.052 |
| rs17789218  | T | 0.76 | 0.019  | 0.003 | 0.018  | 0.060 |
| rs9902312   | T | 0.68 | 0.015  | 0.002 | -0.015 | 0.054 |
| rs11896615  | G | 0.85 | 0.017  | 0.003 | 0.019  | 0.071 |
| rs9569734   | A | 0.84 | 0.019  | 0.003 | -0.020 | 0.073 |
| rs6850494   | A | 0.62 | -0.014 | 0.002 | 0.014  | 0.053 |
| rs10772643  | C | 0.11 | 0.025  | 0.003 | 0.021  | 0.083 |
| rs72725224  | A | 0.98 | -0.046 | 0.008 | -0.049 | 0.195 |
| rs6825241   | C | 0.54 | -0.017 | 0.002 | -0.013 | 0.051 |
| rs12554512  | T | 0.58 | 0.021  | 0.002 | -0.013 | 0.054 |
| rs9964724   | C | 0.32 | 0.018  | 0.002 | -0.013 | 0.055 |

|            |   |      |        |       |        |       |
|------------|---|------|--------|-------|--------|-------|
| rs11020045 | A | 0.67 | -0.013 | 0.002 | -0.013 | 0.055 |
| rs8756     | C | 0.48 | -0.013 | 0.002 | 0.011  | 0.051 |
| rs74996610 | C | 0.95 | -0.031 | 0.005 | -0.029 | 0.135 |
| rs2791574  | T | 0.66 | -0.013 | 0.002 | 0.011  | 0.054 |
| rs6131281  | C | 0.60 | 0.016  | 0.002 | -0.011 | 0.053 |
| rs11629120 | T | 0.59 | -0.013 | 0.002 | -0.009 | 0.052 |
| rs2971640  | G | 0.51 | -0.013 | 0.002 | 0.009  | 0.051 |
| rs2045147  | A | 0.45 | 0.013  | 0.002 | -0.009 | 0.052 |
| rs4775373  | T | 0.36 | 0.013  | 0.002 | -0.008 | 0.053 |
| rs57585211 | T | 0.83 | -0.017 | 0.003 | 0.008  | 0.070 |
| rs56398417 | C | 0.69 | 0.014  | 0.002 | -0.006 | 0.057 |
| rs12475168 | G | 0.87 | -0.018 | 0.003 | 0.006  | 0.072 |
| rs10234444 | G | 0.82 | 0.016  | 0.003 | -0.005 | 0.070 |
| rs631130   | T | 0.37 | -0.014 | 0.002 | -0.004 | 0.059 |
| rs3137     | G | 0.85 | 0.017  | 0.003 | -0.004 | 0.072 |
| rs4675246  | G | 0.80 | -0.015 | 0.003 | 0.003  | 0.066 |
| rs1913808  | G | 0.71 | 0.015  | 0.002 | -0.002 | 0.057 |
| rs2164744  | T | 0.64 | -0.013 | 0.002 | 0.002  | 0.052 |
| rs1031423  | T | 0.22 | -0.019 | 0.003 | 0.002  | 0.062 |
| rs4382592  | T | 0.30 | 0.014  | 0.002 | 0.001  | 0.056 |
| rs4523073  | A | 0.59 | -0.014 | 0.002 | 0.001  | 0.053 |
| rs6125906  | C | 0.91 | -0.021 | 0.004 | 0.000  | 0.090 |

**nonlobar ICH**

|             |   |      |        |       |        |       |
|-------------|---|------|--------|-------|--------|-------|
| rs114328297 | T | 0.78 | 0.014  | 0.003 | -0.178 | 0.076 |
| rs17207890  | G | 0.66 | 0.016  | 0.002 | -0.140 | 0.063 |
| rs10041724  | T | 0.81 | 0.018  | 0.003 | 0.169  | 0.076 |
| rs6141814   | C | 0.61 | -0.014 | 0.002 | 0.117  | 0.063 |
| rs3796386   | G | 0.57 | -0.026 | 0.002 | -0.112 | 0.062 |
| rs2787374   | T | 0.41 | 0.012  | 0.002 | 0.111  | 0.061 |
| rs34864022  | A | 0.93 | -0.026 | 0.004 | 0.246  | 0.142 |
| rs2173650   | G | 0.85 | 0.018  | 0.003 | -0.146 | 0.085 |
| rs17727474  | C | 0.83 | 0.018  | 0.003 | -0.130 | 0.080 |
| rs6124476   | T | 0.59 | 0.012  | 0.002 | 0.094  | 0.062 |
| rs12272012  | G | 0.96 | -0.030 | 0.005 | 0.242  | 0.158 |
| rs7788008   | G | 0.57 | 0.013  | 0.002 | -0.093 | 0.061 |
| rs2336895   | G | 0.36 | 0.012  | 0.002 | 0.097  | 0.064 |
| rs11763734  | A | 0.51 | -0.012 | 0.002 | -0.093 | 0.061 |
| rs17512836  | T | 0.97 | 0.042  | 0.007 | 0.279  | 0.191 |
| rs12491503  | G | 0.67 | -0.014 | 0.002 | -0.089 | 0.063 |
| rs1352890   | C | 0.48 | -0.012 | 0.002 | 0.086  | 0.062 |
| rs255292    | C | 0.40 | -0.012 | 0.002 | -0.084 | 0.062 |
| rs4577309   | A | 0.47 | 0.016  | 0.002 | -0.082 | 0.060 |
| rs2460      | G | 0.74 | -0.015 | 0.002 | -0.094 | 0.070 |
| rs11125515  | C | 0.73 | -0.014 | 0.002 | -0.090 | 0.069 |
| rs35574015  | T | 0.71 | -0.013 | 0.002 | 0.085  | 0.068 |
| rs7564130   | T | 0.64 | -0.015 | 0.002 | -0.078 | 0.063 |
| rs7693082   | G | 0.30 | 0.015  | 0.002 | 0.078  | 0.066 |

|            |   |      |        |       |        |       |
|------------|---|------|--------|-------|--------|-------|
| rs4334769  | G | 0.47 | 0.012  | 0.002 | -0.072 | 0.062 |
| rs374722   | G | 0.15 | 0.024  | 0.003 | 0.097  | 0.084 |
| rs66852340 | C | 0.78 | -0.018 | 0.003 | -0.084 | 0.074 |
| rs10189857 | A | 0.57 | -0.020 | 0.002 | -0.069 | 0.061 |
| rs749671   | G | 0.63 | 0.016  | 0.002 | 0.070  | 0.063 |
| rs10054327 | G | 0.58 | 0.017  | 0.002 | -0.067 | 0.061 |
| rs10246289 | A | 0.11 | 0.019  | 0.003 | 0.103  | 0.094 |
| rs6905544  | A | 0.40 | -0.019 | 0.002 | -0.067 | 0.062 |
| rs2971640  | G | 0.51 | -0.013 | 0.002 | 0.066  | 0.061 |
| rs78394231 | T | 0.90 | -0.021 | 0.004 | -0.109 | 0.101 |
| rs10739499 | C | 0.34 | 0.014  | 0.002 | 0.069  | 0.066 |
| rs10791546 | C | 0.59 | 0.012  | 0.002 | 0.065  | 0.062 |
| rs17379561 | A | 0.86 | -0.025 | 0.003 | 0.090  | 0.089 |
| rs10427502 | G | 0.62 | 0.014  | 0.002 | -0.064 | 0.064 |
| rs7700107  | A | 0.86 | -0.021 | 0.003 | 0.084  | 0.085 |
| rs2791574  | T | 0.66 | -0.013 | 0.002 | 0.063  | 0.065 |
| rs9563168  | G | 0.79 | 0.018  | 0.003 | 0.071  | 0.075 |
| rs4675246  | G | 0.80 | -0.015 | 0.003 | 0.075  | 0.079 |
| rs11245482 | T | 0.61 | -0.013 | 0.002 | 0.059  | 0.063 |
| rs9528023  | C | 0.72 | 0.013  | 0.002 | 0.064  | 0.070 |
| rs10057545 | G | 0.56 | -0.014 | 0.002 | -0.052 | 0.061 |
| rs11689199 | A | 0.60 | 0.018  | 0.002 | 0.053  | 0.062 |
| rs12554512 | T | 0.58 | 0.021  | 0.002 | 0.055  | 0.064 |
| rs11917871 | T | 0.42 | -0.017 | 0.002 | -0.053 | 0.063 |
| rs984409   | G | 0.36 | -0.015 | 0.002 | -0.052 | 0.064 |
| rs328277   | C | 0.40 | 0.012  | 0.002 | -0.050 | 0.062 |
| rs1913808  | G | 0.71 | 0.015  | 0.002 | -0.054 | 0.067 |
| rs12476388 | C | 0.71 | 0.013  | 0.002 | 0.055  | 0.069 |
| rs7089973  | C | 0.62 | -0.013 | 0.002 | -0.051 | 0.064 |
| rs56398417 | C | 0.69 | 0.014  | 0.002 | 0.054  | 0.068 |
| rs10737620 | T | 0.27 | 0.014  | 0.002 | -0.052 | 0.067 |
| rs7609     | A | 0.23 | 0.015  | 0.003 | -0.053 | 0.074 |
| rs10890123 | C | 0.77 | 0.014  | 0.003 | 0.053  | 0.076 |
| rs55700114 | G | 0.71 | -0.014 | 0.002 | -0.046 | 0.066 |
| rs6973656  | A | 0.60 | -0.013 | 0.002 | -0.043 | 0.062 |
| rs12289262 | C | 0.73 | -0.014 | 0.002 | -0.047 | 0.069 |
| rs11179838 | C | 0.64 | 0.013  | 0.002 | -0.044 | 0.064 |
| rs13029509 | G | 0.52 | -0.018 | 0.002 | 0.041  | 0.062 |
| rs12632778 | T | 0.95 | -0.028 | 0.005 | 0.097  | 0.148 |
| rs11810109 | A | 0.70 | 0.016  | 0.002 | 0.042  | 0.067 |
| rs6996198  | C | 0.84 | -0.016 | 0.003 | -0.051 | 0.083 |
| rs71658797 | T | 0.88 | -0.020 | 0.003 | -0.060 | 0.099 |
| rs9569734  | A | 0.84 | 0.019  | 0.003 | -0.052 | 0.086 |
| rs4845364  | A | 0.50 | -0.015 | 0.002 | -0.037 | 0.062 |
| rs262890   | A | 0.70 | -0.019 | 0.002 | -0.040 | 0.068 |
| rs6031440  | A | 0.40 | 0.012  | 0.002 | -0.037 | 0.062 |
| rs12342024 | G | 0.89 | -0.021 | 0.003 | 0.058  | 0.099 |

|             |   |      |        |       |        |       |
|-------------|---|------|--------|-------|--------|-------|
| rs10940659  | A | 0.53 | -0.013 | 0.002 | -0.035 | 0.062 |
| rs7184800   | G | 0.70 | 0.017  | 0.002 | -0.037 | 0.065 |
| rs8043253   | C | 0.57 | -0.012 | 0.002 | 0.034  | 0.062 |
| rs11629120  | T | 0.59 | -0.013 | 0.002 | -0.033 | 0.062 |
| rs1156541   | C | 0.22 | 0.014  | 0.003 | 0.038  | 0.073 |
| rs12105701  | C | 0.40 | -0.013 | 0.002 | -0.030 | 0.062 |
| rs1031423   | T | 0.22 | -0.019 | 0.003 | 0.034  | 0.074 |
| rs9902312   | T | 0.68 | 0.015  | 0.002 | -0.030 | 0.064 |
| rs2694151   | C | 0.06 | 0.026  | 0.005 | 0.058  | 0.127 |
| rs77215114  | A | 0.93 | 0.024  | 0.004 | 0.055  | 0.120 |
| rs11201422  | T | 0.67 | 0.013  | 0.002 | -0.030 | 0.066 |
| rs72725224  | A | 0.98 | -0.046 | 0.008 | 0.084  | 0.236 |
| rs72781699  | G | 0.80 | -0.019 | 0.003 | -0.026 | 0.075 |
| rs2447098   | C | 0.48 | -0.015 | 0.002 | 0.022  | 0.063 |
| rs9471333   | C | 0.45 | 0.013  | 0.002 | -0.021 | 0.062 |
| rs6797840   | A | 0.46 | -0.016 | 0.002 | -0.021 | 0.061 |
| rs10145592  | C | 0.41 | -0.015 | 0.002 | -0.021 | 0.063 |
| rs10947452  | T | 0.35 | 0.014  | 0.002 | 0.021  | 0.065 |
| rs62332760  | G | 0.61 | -0.014 | 0.002 | -0.020 | 0.064 |
| rs973734    | C | 0.15 | 0.017  | 0.003 | -0.026 | 0.085 |
| rs2045147   | A | 0.45 | 0.013  | 0.002 | -0.019 | 0.062 |
| rs112632642 | G | 0.93 | -0.024 | 0.004 | 0.037  | 0.125 |
| rs4382592   | T | 0.30 | 0.014  | 0.002 | 0.020  | 0.067 |
| rs10772643  | C | 0.11 | 0.025  | 0.003 | 0.029  | 0.099 |
| rs12475168  | G | 0.87 | -0.018 | 0.003 | -0.023 | 0.085 |
| rs801733    | A | 0.64 | 0.017  | 0.002 | 0.017  | 0.064 |
| rs10234444  | G | 0.82 | 0.016  | 0.003 | 0.021  | 0.084 |
| rs11714337  | G | 0.57 | 0.014  | 0.002 | -0.015 | 0.062 |
| rs74996610  | C | 0.95 | -0.031 | 0.005 | 0.035  | 0.163 |
| rs6125906   | C | 0.91 | -0.021 | 0.004 | -0.024 | 0.112 |
| rs2164744   | T | 0.64 | -0.013 | 0.002 | 0.013  | 0.062 |
| rs3137      | G | 0.85 | 0.017  | 0.003 | -0.017 | 0.085 |
| rs10771746  | C | 0.72 | -0.014 | 0.002 | 0.014  | 0.069 |
| rs2616830   | G | 0.46 | 0.016  | 0.002 | -0.012 | 0.061 |
| rs9834970   | T | 0.50 | 0.013  | 0.002 | 0.012  | 0.061 |
| rs1022785   | G | 0.14 | 0.018  | 0.003 | -0.017 | 0.088 |
| rs2034768   | A | 0.49 | 0.015  | 0.002 | -0.012 | 0.061 |
| rs9964724   | C | 0.32 | 0.018  | 0.002 | -0.013 | 0.066 |
| rs12725114  | G | 0.80 | 0.015  | 0.003 | 0.014  | 0.075 |
| rs62379379  | G | 0.93 | -0.026 | 0.004 | -0.022 | 0.122 |
| rs6825241   | C | 0.54 | -0.017 | 0.002 | 0.011  | 0.061 |
| rs263771    | C | 0.77 | -0.017 | 0.003 | -0.011 | 0.073 |
| rs11218575  | C | 0.57 | 0.015  | 0.002 | 0.010  | 0.062 |
| rs57585211  | T | 0.83 | -0.017 | 0.003 | -0.013 | 0.083 |
| rs11020045  | A | 0.67 | -0.013 | 0.002 | -0.010 | 0.065 |
| rs4775373   | T | 0.36 | 0.013  | 0.002 | 0.008  | 0.063 |
| rs2291681   | G | 0.58 | 0.013  | 0.002 | -0.008 | 0.062 |



|                  |   |      |        |       |        |       |
|------------------|---|------|--------|-------|--------|-------|
| rs1243182        | C | 0.69 | -0.019 | 0.002 | -0.007 | 0.064 |
| rs17789218       | T | 0.76 | 0.019  | 0.003 | 0.007  | 0.070 |
| rs11896615       | G | 0.85 | 0.017  | 0.003 | 0.005  | 0.084 |
| rs6850494        | A | 0.62 | -0.014 | 0.002 | 0.003  | 0.063 |
| rs8756           | C | 0.48 | -0.013 | 0.002 | 0.002  | 0.060 |
| rs11130793       | C | 0.60 | 0.013  | 0.002 | -0.002 | 0.063 |
| rs56858768       | G | 0.70 | -0.015 | 0.002 | 0.001  | 0.068 |
| <b>lobar ICH</b> |   |      |        |       |        |       |
| rs10189857       | A | 0.57 | -0.020 | 0.002 | -0.241 | 0.067 |
| rs11201422       | T | 0.67 | 0.013  | 0.002 | -0.172 | 0.071 |
| rs10041724       | T | 0.81 | 0.018  | 0.003 | 0.192  | 0.083 |
| rs262890         | A | 0.70 | -0.019 | 0.002 | -0.162 | 0.075 |
| rs11763734       | A | 0.51 | -0.012 | 0.002 | -0.146 | 0.068 |
| rs10427502       | G | 0.62 | 0.014  | 0.002 | -0.148 | 0.069 |
| rs2460           | G | 0.74 | -0.015 | 0.002 | -0.151 | 0.077 |
| rs6996198        | C | 0.84 | -0.016 | 0.003 | -0.173 | 0.088 |
| rs55700114       | G | 0.71 | -0.014 | 0.002 | -0.134 | 0.072 |
| rs11125515       | C | 0.73 | -0.014 | 0.002 | -0.134 | 0.075 |
| rs6031440        | A | 0.40 | 0.012  | 0.002 | -0.121 | 0.069 |
| rs6973656        | A | 0.60 | -0.013 | 0.002 | -0.117 | 0.068 |
| rs255292         | C | 0.40 | -0.012 | 0.002 | -0.116 | 0.069 |
| rs9471333        | C | 0.45 | 0.013  | 0.002 | 0.113  | 0.067 |
| rs11179838       | C | 0.64 | 0.013  | 0.002 | -0.117 | 0.070 |
| rs7184800        | G | 0.70 | 0.017  | 0.002 | 0.119  | 0.072 |
| rs2034768        | A | 0.49 | 0.015  | 0.002 | 0.103  | 0.067 |
| rs56398417       | C | 0.69 | 0.014  | 0.002 | -0.114 | 0.074 |
| rs12554512       | T | 0.58 | 0.021  | 0.002 | -0.107 | 0.070 |
| rs6141814        | C | 0.61 | -0.014 | 0.002 | 0.105  | 0.070 |
| rs17727474       | C | 0.83 | 0.018  | 0.003 | -0.130 | 0.088 |
| rs2291681        | G | 0.58 | 0.013  | 0.002 | 0.101  | 0.069 |
| rs72781699       | G | 0.80 | -0.019 | 0.003 | 0.123  | 0.084 |
| rs12725114       | G | 0.80 | 0.015  | 0.003 | -0.119 | 0.082 |
| rs12272012       | G | 0.96 | -0.030 | 0.005 | 0.261  | 0.182 |
| rs2616830        | G | 0.46 | 0.016  | 0.002 | 0.091  | 0.065 |
| rs11714337       | G | 0.57 | 0.014  | 0.002 | -0.095 | 0.068 |
| rs1913808        | G | 0.71 | 0.015  | 0.002 | 0.102  | 0.074 |
| rs62379379       | G | 0.93 | -0.026 | 0.004 | -0.178 | 0.132 |
| rs2694151        | C | 0.06 | 0.026  | 0.005 | -0.191 | 0.144 |
| rs4334769        | G | 0.47 | 0.012  | 0.002 | -0.087 | 0.067 |
| rs263771         | C | 0.77 | -0.017 | 0.003 | 0.103  | 0.082 |
| rs6124476        | T | 0.59 | 0.012  | 0.002 | 0.084  | 0.068 |
| rs7700107        | A | 0.86 | -0.021 | 0.003 | 0.117  | 0.095 |
| rs328277         | C | 0.40 | 0.012  | 0.002 | -0.083 | 0.069 |
| rs9569734        | A | 0.84 | 0.019  | 0.003 | 0.115  | 0.097 |
| rs66852340       | C | 0.78 | -0.018 | 0.003 | -0.096 | 0.082 |
| rs10145592       | C | 0.41 | -0.015 | 0.002 | -0.080 | 0.069 |
| rs3754970        | T | 0.50 | -0.015 | 0.002 | 0.078  | 0.067 |

|             |   |      |        |       |        |       |
|-------------|---|------|--------|-------|--------|-------|
| rs9834970   | T | 0.50 | 0.013  | 0.002 | 0.078  | 0.068 |
| rs13029509  | G | 0.52 | -0.018 | 0.002 | 0.076  | 0.068 |
| rs12632778  | T | 0.95 | -0.028 | 0.005 | 0.174  | 0.160 |
| rs34864022  | A | 0.93 | -0.026 | 0.004 | -0.148 | 0.139 |
| rs7788008   | G | 0.57 | 0.013  | 0.002 | -0.069 | 0.067 |
| rs10947452  | T | 0.35 | 0.014  | 0.002 | 0.070  | 0.072 |
| rs1243182   | C | 0.69 | -0.019 | 0.002 | 0.066  | 0.070 |
| rs10772643  | C | 0.11 | 0.025  | 0.003 | -0.103 | 0.110 |
| rs3796386   | G | 0.57 | -0.026 | 0.002 | -0.061 | 0.068 |
| rs10771746  | C | 0.72 | -0.014 | 0.002 | -0.066 | 0.074 |
| rs984409    | G | 0.36 | -0.015 | 0.002 | 0.061  | 0.069 |
| rs71658797  | T | 0.88 | -0.020 | 0.003 | -0.096 | 0.111 |
| rs7089973   | C | 0.62 | -0.013 | 0.002 | -0.061 | 0.072 |
| rs9563168   | G | 0.79 | 0.018  | 0.003 | 0.070  | 0.082 |
| rs114328297 | T | 0.78 | 0.014  | 0.003 | 0.073  | 0.086 |
| rs78394231  | T | 0.90 | -0.021 | 0.004 | -0.097 | 0.115 |
| rs12342024  | G | 0.89 | -0.021 | 0.003 | 0.093  | 0.111 |
| rs1022785   | G | 0.14 | 0.018  | 0.003 | 0.080  | 0.096 |
| rs4775373   | T | 0.36 | 0.013  | 0.002 | -0.059 | 0.071 |
| rs11081851  | G | 0.44 | -0.013 | 0.002 | 0.057  | 0.069 |
| rs2971640   | G | 0.51 | -0.013 | 0.002 | -0.054 | 0.067 |
| rs11689199  | A | 0.60 | 0.018  | 0.002 | 0.055  | 0.068 |
| rs77215114  | A | 0.93 | 0.024  | 0.004 | 0.108  | 0.137 |
| rs62332760  | G | 0.61 | -0.014 | 0.002 | -0.055 | 0.070 |
| rs10739499  | C | 0.34 | 0.014  | 0.002 | 0.056  | 0.072 |
| rs6905544   | A | 0.40 | -0.019 | 0.002 | -0.052 | 0.067 |
| rs11896615  | G | 0.85 | 0.017  | 0.003 | 0.071  | 0.093 |
| rs12475168  | G | 0.87 | -0.018 | 0.003 | 0.071  | 0.096 |
| rs56858768  | G | 0.70 | -0.015 | 0.002 | -0.055 | 0.075 |
| rs74996610  | C | 0.95 | -0.031 | 0.005 | -0.120 | 0.176 |
| rs35574015  | T | 0.71 | -0.013 | 0.002 | 0.049  | 0.074 |
| rs10246289  | A | 0.11 | 0.019  | 0.003 | -0.067 | 0.105 |
| rs7693082   | G | 0.30 | 0.015  | 0.002 | 0.044  | 0.071 |
| rs11629120  | T | 0.59 | -0.013 | 0.002 | 0.042  | 0.068 |
| rs7564130   | T | 0.64 | -0.015 | 0.002 | -0.036 | 0.069 |
| rs72725224  | A | 0.98 | -0.046 | 0.008 | -0.128 | 0.247 |
| rs10057545  | G | 0.56 | -0.014 | 0.002 | 0.034  | 0.067 |
| rs10940659  | A | 0.53 | -0.013 | 0.002 | -0.034 | 0.067 |
| rs1156541   | C | 0.22 | 0.014  | 0.003 | 0.039  | 0.079 |
| rs8043253   | C | 0.57 | -0.012 | 0.002 | 0.034  | 0.068 |
| rs2791574   | T | 0.66 | -0.013 | 0.002 | -0.035 | 0.071 |
| rs6850494   | A | 0.62 | -0.014 | 0.002 | 0.032  | 0.068 |
| rs12491503  | G | 0.67 | -0.014 | 0.002 | -0.033 | 0.071 |
| rs2045147   | A | 0.45 | 0.013  | 0.002 | -0.031 | 0.068 |
| rs9528023   | C | 0.72 | 0.013  | 0.002 | 0.035  | 0.076 |
| rs3137      | G | 0.85 | 0.017  | 0.003 | 0.042  | 0.094 |
| rs17512836  | T | 0.97 | 0.042  | 0.007 | 0.085  | 0.195 |

|             |   |      |        |       |        |       |
|-------------|---|------|--------|-------|--------|-------|
| rs11130793  | C | 0.60 | 0.013  | 0.002 | 0.029  | 0.070 |
| rs4382592   | T | 0.30 | 0.014  | 0.002 | -0.029 | 0.074 |
| rs4845364   | A | 0.50 | -0.015 | 0.002 | -0.026 | 0.068 |
| rs2336895   | G | 0.36 | 0.012  | 0.002 | 0.025  | 0.070 |
| rs55909997  | G | 0.65 | -0.014 | 0.002 | -0.025 | 0.070 |
| rs11810109  | A | 0.70 | 0.016  | 0.002 | 0.026  | 0.074 |
| rs10890123  | C | 0.77 | 0.014  | 0.003 | -0.028 | 0.082 |
| rs4577309   | A | 0.47 | 0.016  | 0.002 | 0.023  | 0.068 |
| rs11218575  | C | 0.57 | 0.015  | 0.002 | -0.022 | 0.068 |
| rs2173650   | G | 0.85 | 0.018  | 0.003 | -0.031 | 0.096 |
| rs9902312   | T | 0.68 | 0.015  | 0.002 | 0.023  | 0.071 |
| rs11020045  | A | 0.67 | -0.013 | 0.002 | 0.023  | 0.073 |
| rs2447098   | C | 0.48 | -0.015 | 0.002 | 0.021  | 0.069 |
| rs10234444  | G | 0.82 | 0.016  | 0.003 | -0.028 | 0.091 |
| rs801733    | A | 0.64 | 0.017  | 0.002 | 0.021  | 0.071 |
| rs10054327  | G | 0.58 | 0.017  | 0.002 | -0.017 | 0.067 |
| rs631130    | T | 0.37 | -0.014 | 0.002 | -0.020 | 0.076 |
| rs11245482  | T | 0.61 | -0.013 | 0.002 | 0.018  | 0.070 |
| rs7609      | A | 0.23 | 0.015  | 0.003 | -0.020 | 0.081 |
| rs112632642 | G | 0.93 | -0.024 | 0.004 | 0.032  | 0.137 |
| rs17207890  | G | 0.66 | 0.016  | 0.002 | 0.015  | 0.070 |
| rs17789218  | T | 0.76 | 0.019  | 0.003 | 0.015  | 0.079 |
| rs2787374   | T | 0.41 | 0.012  | 0.002 | 0.013  | 0.069 |
| rs374722    | G | 0.15 | 0.024  | 0.003 | 0.018  | 0.093 |
| rs973734    | C | 0.15 | 0.017  | 0.003 | 0.017  | 0.095 |
| rs57585211  | T | 0.83 | -0.017 | 0.003 | 0.016  | 0.092 |
| rs12289262  | C | 0.73 | -0.014 | 0.002 | -0.011 | 0.076 |
| rs749671    | G | 0.63 | 0.016  | 0.002 | -0.008 | 0.069 |
| rs10737620  | T | 0.27 | 0.014  | 0.002 | 0.009  | 0.075 |
| rs10791546  | C | 0.59 | 0.012  | 0.002 | 0.007  | 0.068 |
| rs6131281   | C | 0.60 | 0.016  | 0.002 | -0.007 | 0.070 |
| rs12105701  | C | 0.40 | -0.013 | 0.002 | -0.007 | 0.069 |
| rs6125906   | C | 0.91 | -0.021 | 0.004 | 0.009  | 0.119 |
| rs17379561  | A | 0.86 | -0.025 | 0.003 | -0.007 | 0.098 |
| rs9964724   | C | 0.32 | 0.018  | 0.002 | -0.005 | 0.073 |
| rs8756      | C | 0.48 | -0.013 | 0.002 | 0.005  | 0.066 |
| rs1031423   | T | 0.22 | -0.019 | 0.003 | -0.004 | 0.081 |
| rs6825241   | C | 0.54 | -0.017 | 0.002 | 0.003  | 0.067 |
| rs12476388  | C | 0.71 | 0.013  | 0.002 | 0.003  | 0.077 |
| rs6797840   | A | 0.46 | -0.016 | 0.002 | -0.003 | 0.067 |
| rs1352890   | C | 0.48 | -0.012 | 0.002 | -0.002 | 0.068 |
| rs2164744   | T | 0.64 | -0.013 | 0.002 | 0.002  | 0.069 |
| <b>WMH</b>  |   |      |        |       |        |       |
| rs11917871  | T | 0.42 | -0.017 | 0.002 | 0.037  | 0.013 |
| rs4973576   | C | 0.30 | -0.015 | 0.002 | 0.039  | 0.014 |
| rs17512836  | T | 0.97 | 0.042  | 0.007 | -0.103 | 0.039 |
| rs6905544   | A | 0.40 | -0.019 | 0.002 | -0.031 | 0.013 |

|            |   |      |        |       |        |       |
|------------|---|------|--------|-------|--------|-------|
| rs6141814  | C | 0.61 | -0.014 | 0.002 | 0.029  | 0.013 |
| rs1243182  | C | 0.69 | -0.019 | 0.002 | 0.030  | 0.013 |
| rs2173650  | G | 0.85 | 0.018  | 0.003 | 0.039  | 0.018 |
| rs7700107  | A | 0.86 | -0.021 | 0.003 | -0.038 | 0.018 |
| rs10737620 | T | 0.27 | 0.014  | 0.002 | 0.028  | 0.014 |
| rs6124476  | T | 0.59 | 0.012  | 0.002 | 0.025  | 0.013 |
| rs11689199 | A | 0.60 | 0.018  | 0.002 | 0.025  | 0.013 |
| rs12491503 | G | 0.67 | -0.014 | 0.002 | -0.026 | 0.013 |
| rs6131281  | C | 0.60 | 0.016  | 0.002 | -0.024 | 0.013 |
| rs74996610 | C | 0.95 | -0.031 | 0.005 | -0.057 | 0.031 |
| rs34864022 | A | 0.93 | -0.026 | 0.004 | 0.045  | 0.026 |
| rs2971640  | G | 0.51 | -0.013 | 0.002 | 0.022  | 0.012 |
| rs3754970  | T | 0.50 | -0.015 | 0.002 | -0.022 | 0.012 |
| rs11896615 | G | 0.85 | 0.017  | 0.003 | 0.031  | 0.018 |
| rs2164744  | T | 0.64 | -0.013 | 0.002 | 0.022  | 0.013 |
| rs3137     | G | 0.85 | 0.017  | 0.003 | 0.028  | 0.017 |
| rs17789218 | T | 0.76 | 0.019  | 0.003 | -0.024 | 0.014 |
| rs4523073  | A | 0.59 | -0.014 | 0.002 | 0.020  | 0.013 |
| rs10427502 | G | 0.62 | 0.014  | 0.002 | 0.021  | 0.013 |
| rs3796386  | G | 0.57 | -0.026 | 0.002 | -0.020 | 0.013 |
| rs255292   | C | 0.40 | -0.012 | 0.002 | -0.020 | 0.013 |
| rs7693703  | G | 0.91 | 0.023  | 0.004 | -0.033 | 0.022 |
| rs7184800  | G | 0.70 | 0.017  | 0.002 | 0.020  | 0.013 |
| rs1022785  | G | 0.14 | 0.018  | 0.003 | 0.027  | 0.018 |
| rs11629120 | T | 0.59 | -0.013 | 0.002 | 0.019  | 0.013 |
| rs6125906  | C | 0.91 | -0.021 | 0.004 | -0.031 | 0.021 |
| rs11130793 | C | 0.60 | 0.013  | 0.002 | 0.019  | 0.013 |
| rs10994943 | T | 0.58 | 0.013  | 0.002 | 0.018  | 0.013 |
| rs74802478 | G | 0.82 | 0.017  | 0.003 | 0.023  | 0.016 |
| rs4937842  | G | 0.63 | -0.013 | 0.002 | -0.019 | 0.013 |
| rs9834970  | T | 0.50 | 0.013  | 0.002 | 0.017  | 0.012 |
| rs12632778 | T | 0.95 | -0.028 | 0.005 | 0.040  | 0.029 |
| rs9563168  | G | 0.79 | 0.018  | 0.003 | 0.020  | 0.015 |
| rs648044   | A | 0.40 | -0.014 | 0.002 | -0.017 | 0.013 |
| rs77215114 | A | 0.93 | 0.024  | 0.004 | -0.033 | 0.025 |
| rs4845364  | A | 0.50 | -0.015 | 0.002 | -0.017 | 0.012 |
| rs56858768 | G | 0.70 | -0.015 | 0.002 | 0.018  | 0.014 |
| rs11081851 | G | 0.44 | -0.013 | 0.002 | -0.016 | 0.012 |
| rs10145592 | C | 0.41 | -0.015 | 0.002 | -0.016 | 0.013 |
| rs7609     | A | 0.23 | 0.015  | 0.003 | -0.019 | 0.015 |
| rs4382592  | T | 0.30 | 0.014  | 0.002 | 0.017  | 0.014 |
| rs11714337 | G | 0.57 | 0.014  | 0.002 | -0.015 | 0.012 |
| rs11179838 | C | 0.64 | 0.013  | 0.002 | 0.015  | 0.013 |
| rs9528023  | C | 0.72 | 0.013  | 0.002 | 0.016  | 0.014 |
| rs42210    | G | 0.29 | -0.014 | 0.002 | 0.016  | 0.014 |
| rs6797840  | A | 0.46 | -0.016 | 0.002 | 0.014  | 0.013 |
| rs1913808  | G | 0.71 | 0.015  | 0.002 | -0.015 | 0.014 |

|             |   |      |        |       |        |       |
|-------------|---|------|--------|-------|--------|-------|
| rs262890    | A | 0.70 | -0.019 | 0.002 | 0.015  | 0.014 |
| rs55700114  | G | 0.71 | -0.014 | 0.002 | 0.015  | 0.014 |
| rs2336895   | G | 0.36 | 0.012  | 0.002 | -0.014 | 0.013 |
| rs12541615  | T | 0.82 | -0.018 | 0.003 | -0.016 | 0.016 |
| rs9902312   | T | 0.68 | 0.015  | 0.002 | 0.014  | 0.013 |
| rs7693082   | G | 0.30 | 0.015  | 0.002 | 0.014  | 0.014 |
| rs72671494  | T | 0.86 | -0.017 | 0.003 | 0.018  | 0.018 |
| rs72828890  | C | 0.87 | 0.019  | 0.003 | -0.019 | 0.019 |
| rs34811474  | G | 0.77 | 0.015  | 0.003 | -0.014 | 0.015 |
| rs4675246   | G | 0.80 | -0.015 | 0.003 | -0.015 | 0.015 |
| rs10772643  | C | 0.11 | 0.025  | 0.003 | 0.019  | 0.020 |
| rs6850494   | A | 0.62 | -0.014 | 0.002 | -0.012 | 0.013 |
| rs10876864  | G | 0.43 | -0.013 | 0.002 | -0.012 | 0.013 |
| rs2717559   | A | 0.56 | 0.012  | 0.002 | 0.012  | 0.013 |
| rs11245482  | T | 0.61 | -0.013 | 0.002 | 0.012  | 0.013 |
| rs10041724  | T | 0.81 | 0.018  | 0.003 | 0.014  | 0.016 |
| rs303753    | G | 0.65 | -0.014 | 0.002 | -0.012 | 0.013 |
| rs59210467  | C | 0.69 | -0.013 | 0.002 | -0.012 | 0.014 |
| rs984409    | G | 0.36 | -0.015 | 0.002 | -0.011 | 0.013 |
| rs9867121   | C | 0.82 | 0.019  | 0.003 | -0.014 | 0.016 |
| rs13107325  | C | 0.93 | -0.029 | 0.004 | -0.020 | 0.024 |
| rs7157001   | A | 0.74 | -0.014 | 0.002 | 0.012  | 0.014 |
| rs6472942   | T | 0.57 | -0.013 | 0.002 | 0.010  | 0.013 |
| rs1421334   | A | 0.45 | 0.017  | 0.002 | 0.010  | 0.013 |
| rs10189857  | A | 0.57 | -0.020 | 0.002 | -0.010 | 0.013 |
| rs10739499  | C | 0.34 | 0.014  | 0.002 | -0.010 | 0.013 |
| rs12272012  | G | 0.96 | -0.030 | 0.005 | -0.023 | 0.029 |
| rs1352890   | C | 0.48 | -0.012 | 0.002 | 0.010  | 0.012 |
| rs10932837  | C | 0.49 | -0.013 | 0.002 | -0.009 | 0.012 |
| rs10246289  | A | 0.11 | 0.019  | 0.003 | 0.015  | 0.020 |
| rs17727474  | C | 0.83 | 0.018  | 0.003 | -0.012 | 0.017 |
| rs11125515  | C | 0.73 | -0.014 | 0.002 | -0.010 | 0.014 |
| rs17379561  | A | 0.86 | -0.025 | 0.003 | -0.012 | 0.018 |
| rs2447098   | C | 0.48 | -0.015 | 0.002 | 0.009  | 0.013 |
| rs62379379  | G | 0.93 | -0.026 | 0.004 | -0.016 | 0.024 |
| rs138256022 | C | 0.96 | -0.031 | 0.006 | -0.022 | 0.032 |
| rs62332760  | G | 0.61 | -0.014 | 0.002 | 0.008  | 0.013 |
| rs11218575  | C | 0.57 | 0.015  | 0.002 | -0.008 | 0.013 |
| rs11654952  | T | 0.86 | -0.017 | 0.003 | 0.011  | 0.018 |
| rs801733    | A | 0.64 | 0.017  | 0.002 | 0.008  | 0.013 |
| rs11657730  | C | 0.64 | 0.013  | 0.002 | 0.008  | 0.013 |
| rs62641636  | A | 0.69 | 0.014  | 0.002 | 0.008  | 0.013 |
| rs10771746  | C | 0.72 | -0.014 | 0.002 | 0.008  | 0.014 |
| rs2787374   | T | 0.41 | 0.012  | 0.002 | -0.007 | 0.013 |
| rs114328297 | T | 0.78 | 0.014  | 0.003 | 0.009  | 0.015 |
| rs112632642 | G | 0.93 | -0.024 | 0.004 | -0.014 | 0.026 |
| rs7248205   | C | 0.40 | 0.014  | 0.002 | 0.007  | 0.013 |

|             |   |      |        |       |        |       |
|-------------|---|------|--------|-------|--------|-------|
| rs183566425 | A | 0.98 | 0.046  | 0.008 | 0.027  | 0.050 |
| rs78394231  | T | 0.90 | -0.021 | 0.004 | 0.011  | 0.021 |
| rs6031440   | A | 0.40 | 0.012  | 0.002 | 0.007  | 0.013 |
| rs631130    | T | 0.37 | -0.014 | 0.002 | -0.007 | 0.014 |
| rs263771    | C | 0.77 | -0.017 | 0.003 | -0.008 | 0.015 |
| rs10890123  | C | 0.77 | 0.014  | 0.003 | 0.008  | 0.015 |
| rs328277    | C | 0.40 | 0.012  | 0.002 | -0.007 | 0.013 |
| rs114600294 | G | 0.79 | -0.016 | 0.003 | 0.008  | 0.016 |
| rs13029509  | G | 0.52 | -0.018 | 0.002 | -0.006 | 0.012 |
| rs749671    | G | 0.63 | 0.016  | 0.002 | 0.006  | 0.013 |
| rs4334769   | G | 0.47 | 0.012  | 0.002 | -0.005 | 0.012 |
| rs9718104   | T | 0.94 | -0.041 | 0.005 | 0.012  | 0.027 |
| rs12289262  | C | 0.73 | -0.014 | 0.002 | -0.006 | 0.014 |
| rs148544378 | C | 0.98 | 0.053  | 0.008 | -0.020 | 0.046 |
| rs10947452  | T | 0.35 | 0.014  | 0.002 | -0.005 | 0.013 |
| rs1156541   | C | 0.22 | 0.014  | 0.003 | 0.006  | 0.015 |
| rs11201422  | T | 0.67 | 0.013  | 0.002 | 0.005  | 0.013 |
| rs6973656   | A | 0.60 | -0.013 | 0.002 | 0.005  | 0.013 |
| rs374722    | G | 0.15 | 0.024  | 0.003 | 0.007  | 0.018 |
| rs6996198   | C | 0.84 | -0.016 | 0.003 | -0.006 | 0.017 |
| rs1451533   | G | 0.72 | -0.016 | 0.002 | 0.005  | 0.014 |
| rs1278847   | C | 0.69 | 0.016  | 0.002 | -0.005 | 0.014 |
| rs72834698  | G | 0.86 | 0.023  | 0.003 | 0.006  | 0.018 |
| rs35574015  | T | 0.71 | -0.013 | 0.002 | 0.005  | 0.014 |
| rs17207890  | G | 0.66 | 0.016  | 0.002 | 0.004  | 0.013 |
| rs2045147   | A | 0.45 | 0.013  | 0.002 | 0.004  | 0.013 |
| rs7189927   | T | 0.36 | 0.015  | 0.002 | 0.004  | 0.013 |
| rs10054327  | G | 0.58 | 0.017  | 0.002 | 0.004  | 0.013 |
| rs10940659  | A | 0.53 | -0.013 | 0.002 | -0.004 | 0.013 |
| rs12554512  | T | 0.58 | 0.021  | 0.002 | -0.004 | 0.013 |
| rs7089973   | C | 0.62 | -0.013 | 0.002 | -0.004 | 0.013 |
| rs71658797  | T | 0.88 | -0.020 | 0.003 | -0.006 | 0.019 |
| rs6825241   | C | 0.54 | -0.017 | 0.002 | 0.004  | 0.012 |
| rs6673341   | T | 0.47 | -0.015 | 0.002 | 0.003  | 0.012 |
| rs2616830   | G | 0.46 | 0.016  | 0.002 | -0.003 | 0.012 |
| rs12105701  | C | 0.40 | -0.013 | 0.002 | 0.003  | 0.013 |
| rs11810109  | A | 0.70 | 0.016  | 0.002 | -0.003 | 0.014 |
| rs56103247  | C | 0.94 | 0.030  | 0.005 | 0.006  | 0.027 |
| rs7564130   | T | 0.64 | -0.015 | 0.002 | 0.003  | 0.013 |
| rs1031423   | T | 0.22 | -0.019 | 0.003 | -0.003 | 0.015 |
| rs7788008   | G | 0.57 | 0.013  | 0.002 | -0.003 | 0.012 |
| rs72781699  | G | 0.80 | -0.019 | 0.003 | -0.003 | 0.015 |
| rs10791546  | C | 0.59 | 0.012  | 0.002 | 0.002  | 0.013 |
| rs57585211  | T | 0.83 | -0.017 | 0.003 | -0.003 | 0.016 |
| rs8043253   | C | 0.57 | -0.012 | 0.002 | 0.002  | 0.012 |
| rs1790135   | C | 0.24 | -0.014 | 0.003 | -0.002 | 0.014 |
| rs11763734  | A | 0.51 | -0.012 | 0.002 | -0.002 | 0.012 |

|             |   |      |        |       |        |       |
|-------------|---|------|--------|-------|--------|-------|
| rs56398417  | C | 0.69 | 0.014  | 0.002 | 0.002  | 0.013 |
| rs2034768   | A | 0.49 | 0.015  | 0.002 | -0.002 | 0.012 |
| rs72725224  | A | 0.98 | -0.046 | 0.008 | 0.007  | 0.047 |
| rs12725114  | G | 0.80 | 0.015  | 0.003 | 0.002  | 0.016 |
| rs4577309   | A | 0.47 | 0.016  | 0.002 | 0.002  | 0.012 |
| rs10234444  | G | 0.82 | 0.016  | 0.003 | 0.002  | 0.016 |
| rs12342024  | G | 0.89 | -0.021 | 0.003 | 0.002  | 0.019 |
| rs9964724   | C | 0.32 | 0.018  | 0.002 | 0.002  | 0.013 |
| rs10057545  | G | 0.56 | -0.014 | 0.002 | -0.001 | 0.012 |
| rs4775373   | T | 0.36 | 0.013  | 0.002 | -0.001 | 0.013 |
| rs8756      | C | 0.48 | -0.013 | 0.002 | -0.001 | 0.012 |
| rs9471333   | C | 0.45 | 0.013  | 0.002 | -0.001 | 0.013 |
| rs2694151   | C | 0.06 | 0.026  | 0.005 | 0.002  | 0.027 |
| rs2460      | G | 0.74 | -0.015 | 0.002 | 0.001  | 0.014 |
| rs2291681   | G | 0.58 | 0.013  | 0.002 | -0.001 | 0.013 |
| rs141425667 | G | 0.93 | -0.024 | 0.004 | -0.002 | 0.025 |
| rs2073869   | C | 0.83 | 0.019  | 0.003 | 0.001  | 0.016 |
| rs973734    | C | 0.15 | 0.017  | 0.003 | 0.001  | 0.017 |
| rs2791574   | T | 0.66 | -0.013 | 0.002 | 0.000  | 0.013 |

**AD**

|             |   |      |        |       |        |       |
|-------------|---|------|--------|-------|--------|-------|
| rs10041724  | T | 0.81 | 0.018  | 0.003 | -0.005 | 0.018 |
| rs10054327  | G | 0.58 | 0.017  | 0.002 | 0.024  | 0.014 |
| rs10145592  | C | 0.41 | -0.015 | 0.002 | -0.008 | 0.015 |
| rs10189857  | A | 0.57 | -0.020 | 0.002 | -0.017 | 0.015 |
| rs1022785   | G | 0.14 | 0.018  | 0.003 | 0.025  | 0.020 |
| rs10234444  | G | 0.82 | 0.016  | 0.003 | -0.018 | 0.019 |
| rs10246289  | A | 0.11 | 0.019  | 0.003 | -0.007 | 0.022 |
| rs1031423   | T | 0.22 | -0.019 | 0.003 | -0.008 | 0.018 |
| rs10427502  | G | 0.62 | 0.014  | 0.002 | 0.005  | 0.015 |
| rs10737620  | T | 0.27 | 0.014  | 0.002 | 0.004  | 0.016 |
| rs10771746  | C | 0.72 | -0.014 | 0.002 | 0.006  | 0.016 |
| rs10772643  | C | 0.11 | 0.025  | 0.003 | -0.008 | 0.024 |
| rs10876864  | G | 0.43 | -0.013 | 0.002 | 0.002  | 0.014 |
| rs10890123  | C | 0.77 | 0.014  | 0.003 | 0.028  | 0.018 |
| rs10932837  | C | 0.49 | -0.013 | 0.002 | -0.019 | 0.014 |
| rs10940659  | A | 0.53 | -0.013 | 0.002 | 0.010  | 0.014 |
| rs10994943  | T | 0.58 | 0.013  | 0.002 | 0.005  | 0.015 |
| rs11020045  | A | 0.67 | -0.013 | 0.002 | 0.007  | 0.015 |
| rs11130793  | C | 0.60 | 0.013  | 0.002 | 0.011  | 0.015 |
| rs11201422  | T | 0.67 | 0.013  | 0.002 | -0.005 | 0.015 |
| rs11218575  | C | 0.57 | 0.015  | 0.002 | -0.009 | 0.015 |
| rs11245482  | T | 0.61 | -0.013 | 0.002 | 0.002  | 0.015 |
| rs114328297 | T | 0.78 | 0.014  | 0.003 | 0.022  | 0.018 |
| rs114600294 | G | 0.79 | -0.016 | 0.003 | -0.010 | 0.024 |
| rs1156541   | C | 0.22 | 0.014  | 0.003 | -0.030 | 0.017 |
| rs11654952  | T | 0.86 | -0.017 | 0.003 | -0.064 | 0.023 |
| rs11657730  | C | 0.64 | 0.013  | 0.002 | 0.016  | 0.018 |

|             |   |      |        |       |        |       |
|-------------|---|------|--------|-------|--------|-------|
| rs11689199  | A | 0.60 | 0.018  | 0.002 | 0.027  | 0.015 |
| rs11714337  | G | 0.57 | 0.014  | 0.002 | 0.008  | 0.014 |
| rs11763734  | A | 0.51 | -0.012 | 0.002 | 0.008  | 0.014 |
| rs11810109  | A | 0.70 | 0.016  | 0.002 | -0.003 | 0.015 |
| rs12105701  | C | 0.40 | -0.013 | 0.002 | 0.014  | 0.015 |
| rs12272012  | G | 0.96 | -0.030 | 0.005 | 0.014  | 0.036 |
| rs12289262  | C | 0.73 | -0.014 | 0.002 | -0.032 | 0.016 |
| rs1243182   | C | 0.69 | -0.019 | 0.002 | 0.023  | 0.015 |
| rs12476388  | C | 0.71 | 0.013  | 0.002 | -0.010 | 0.016 |
| rs12491503  | G | 0.67 | -0.014 | 0.002 | 0.011  | 0.015 |
| rs12541615  | T | 0.82 | -0.018 | 0.003 | 0.040  | 0.019 |
| rs12554512  | T | 0.58 | 0.021  | 0.002 | 0.030  | 0.016 |
| rs12725114  | G | 0.80 | 0.015  | 0.003 | -0.039 | 0.018 |
| rs1278847   | C | 0.69 | 0.016  | 0.002 | 0.010  | 0.016 |
| rs13029509  | G | 0.52 | -0.018 | 0.002 | -0.001 | 0.014 |
| rs13107325  | C | 0.93 | -0.029 | 0.004 | -0.020 | 0.027 |
| rs138256022 | C | 0.96 | -0.031 | 0.006 | 0.007  | 0.040 |
| rs141184308 | A | 0.98 | 0.043  | 0.008 | 0.092  | 0.080 |
| rs1421334   | A | 0.45 | 0.017  | 0.002 | -0.012 | 0.015 |
| rs1451533   | G | 0.72 | -0.016 | 0.002 | -0.023 | 0.017 |
| rs17207890  | G | 0.66 | 0.016  | 0.002 | 0.028  | 0.015 |
| rs17379561  | A | 0.86 | -0.025 | 0.003 | -0.012 | 0.021 |
| rs17512836  | T | 0.97 | 0.042  | 0.007 | -0.003 | 0.042 |
| rs17727474  | C | 0.83 | 0.018  | 0.003 | 0.003  | 0.019 |
| rs17789218  | T | 0.76 | 0.019  | 0.003 | 0.007  | 0.018 |
| rs2034768   | A | 0.49 | 0.015  | 0.002 | -0.002 | 0.014 |
| rs2045147   | A | 0.45 | 0.013  | 0.002 | 0.015  | 0.014 |
| rs2073869   | C | 0.83 | 0.019  | 0.003 | 0.006  | 0.019 |
| rs2092829   | G | 0.71 | 0.014  | 0.002 | 0.000  | 0.016 |
| rs2164744   | T | 0.64 | -0.013 | 0.002 | -0.004 | 0.015 |
| rs2173650   | G | 0.85 | 0.018  | 0.003 | -0.019 | 0.020 |
| rs2184364   | A | 0.78 | 0.016  | 0.003 | 0.026  | 0.018 |
| rs2447098   | C | 0.48 | -0.015 | 0.002 | 0.016  | 0.015 |
| rs2460      | G | 0.74 | -0.015 | 0.002 | -0.003 | 0.017 |
| rs2584597   | T | 0.66 | 0.015  | 0.002 | -0.016 | 0.016 |
| rs2616830   | G | 0.46 | 0.016  | 0.002 | 0.016  | 0.015 |
| rs262890    | A | 0.70 | -0.019 | 0.002 | -0.003 | 0.016 |
| rs2717559   | A | 0.56 | 0.012  | 0.002 | -0.006 | 0.015 |
| rs2787374   | T | 0.41 | 0.012  | 0.002 | -0.029 | 0.014 |
| rs303753    | G | 0.65 | -0.014 | 0.002 | 0.002  | 0.015 |
| rs34864022  | A | 0.93 | -0.026 | 0.004 | -0.066 | 0.032 |
| rs35574015  | T | 0.71 | -0.013 | 0.002 | -0.007 | 0.016 |
| rs374722    | G | 0.15 | 0.024  | 0.003 | 0.019  | 0.020 |
| rs3754970   | T | 0.50 | -0.015 | 0.002 | 0.013  | 0.014 |
| rs3796386   | G | 0.57 | -0.026 | 0.002 | 0.004  | 0.015 |
| rs405797    | T | 0.25 | -0.015 | 0.003 | -0.001 | 0.016 |
| rs42210     | G | 0.29 | -0.014 | 0.002 | -0.007 | 0.016 |



|            |   |      |        |       |        |       |
|------------|---|------|--------|-------|--------|-------|
| rs4334769  | G | 0.47 | 0.012  | 0.002 | -0.002 | 0.014 |
| rs4382592  | T | 0.30 | 0.014  | 0.002 | -0.001 | 0.015 |
| rs4523073  | A | 0.59 | -0.014 | 0.002 | 0.003  | 0.015 |
| rs4577309  | A | 0.47 | 0.016  | 0.002 | 0.014  | 0.014 |
| rs4675246  | G | 0.80 | -0.015 | 0.003 | 0.006  | 0.018 |
| rs4775373  | T | 0.36 | 0.013  | 0.002 | -0.016 | 0.015 |
| rs4845364  | A | 0.50 | -0.015 | 0.002 | -0.002 | 0.014 |
| rs4937842  | G | 0.63 | -0.013 | 0.002 | 0.014  | 0.015 |
| rs4973576  | C | 0.30 | -0.015 | 0.002 | -0.027 | 0.016 |
| rs55700114 | G | 0.71 | -0.014 | 0.002 | 0.018  | 0.015 |
| rs55909997 | G | 0.65 | -0.014 | 0.002 | 0.008  | 0.015 |
| rs56103247 | C | 0.94 | 0.030  | 0.005 | -0.037 | 0.037 |
| rs56858768 | G | 0.70 | -0.015 | 0.002 | 0.001  | 0.016 |
| rs57585211 | T | 0.83 | -0.017 | 0.003 | -0.012 | 0.019 |
| rs6131281  | C | 0.60 | 0.016  | 0.002 | -0.005 | 0.015 |
| rs6141814  | C | 0.61 | -0.014 | 0.002 | -0.002 | 0.015 |
| rs62379379 | G | 0.93 | -0.026 | 0.004 | -0.011 | 0.029 |
| rs62641636 | A | 0.69 | 0.014  | 0.002 | 0.025  | 0.016 |
| rs6472942  | T | 0.57 | -0.013 | 0.002 | -0.008 | 0.015 |
| rs6673341  | T | 0.47 | -0.015 | 0.002 | -0.003 | 0.014 |
| rs66852340 | C | 0.78 | -0.018 | 0.003 | -0.027 | 0.018 |
| rs6721975  | T | 0.23 | -0.017 | 0.003 | -0.017 | 0.018 |
| rs6797840  | A | 0.46 | -0.016 | 0.002 | 0.020  | 0.014 |
| rs6825241  | C | 0.54 | -0.017 | 0.002 | 0.017  | 0.015 |
| rs6850494  | A | 0.62 | -0.014 | 0.002 | 0.003  | 0.015 |
| rs6905544  | A | 0.40 | -0.019 | 0.002 | -0.029 | 0.015 |
| rs6973656  | A | 0.60 | -0.013 | 0.002 | -0.018 | 0.015 |
| rs6996198  | C | 0.84 | -0.016 | 0.003 | -0.004 | 0.020 |
| rs7089973  | C | 0.62 | -0.013 | 0.002 | 0.034  | 0.015 |
| rs7157001  | A | 0.74 | -0.014 | 0.002 | -0.007 | 0.020 |
| rs71658797 | T | 0.88 | -0.020 | 0.003 | 0.019  | 0.024 |
| rs7184800  | G | 0.70 | 0.017  | 0.002 | 0.002  | 0.015 |
| rs7189927  | T | 0.36 | 0.015  | 0.002 | -0.024 | 0.016 |
| rs7248205  | C | 0.40 | 0.014  | 0.002 | -0.032 | 0.015 |
| rs72671494 | T | 0.86 | -0.017 | 0.003 | -0.041 | 0.024 |
| rs72781699 | G | 0.80 | -0.019 | 0.003 | -0.020 | 0.018 |
| rs72828890 | C | 0.87 | 0.019  | 0.003 | 0.012  | 0.025 |
| rs72834698 | G | 0.86 | 0.023  | 0.003 | 0.029  | 0.022 |
| rs749671   | G | 0.63 | 0.016  | 0.002 | -0.021 | 0.015 |
| rs7564130  | T | 0.64 | -0.015 | 0.002 | -0.018 | 0.015 |
| rs7693082  | G | 0.30 | 0.015  | 0.002 | 0.016  | 0.016 |
| rs7693703  | G | 0.91 | 0.023  | 0.004 | 0.007  | 0.025 |
| rs7700107  | A | 0.86 | -0.021 | 0.003 | -0.038 | 0.020 |
| rs7716447  | A | 0.64 | -0.013 | 0.002 | 0.028  | 0.020 |
| rs77215114 | A | 0.93 | 0.024  | 0.004 | 0.014  | 0.032 |
| rs7991062  | C | 0.66 | -0.018 | 0.002 | 0.012  | 0.015 |
| rs801733   | A | 0.64 | 0.017  | 0.002 | -0.023 | 0.015 |

|            |   |      |        |       |        |       |
|------------|---|------|--------|-------|--------|-------|
| rs8043253  | C | 0.57 | -0.012 | 0.002 | 0.014  | 0.015 |
| rs8756     | C | 0.48 | -0.013 | 0.002 | -0.011 | 0.014 |
| rs9471333  | C | 0.45 | 0.013  | 0.002 | 0.025  | 0.014 |
| rs9563168  | G | 0.79 | 0.018  | 0.003 | -0.014 | 0.017 |
| rs9569734  | A | 0.84 | 0.019  | 0.003 | 0.013  | 0.020 |
| rs9718104  | T | 0.94 | -0.041 | 0.005 | 0.020  | 0.035 |
| rs973734   | C | 0.15 | 0.017  | 0.003 | 0.028  | 0.020 |
| rs9834970  | T | 0.50 | 0.013  | 0.002 | 0.002  | 0.014 |
| rs984409   | G | 0.36 | -0.015 | 0.002 | 0.028  | 0.015 |
| rs9867121  | C | 0.82 | 0.019  | 0.003 | -0.019 | 0.019 |
| rs9902312  | T | 0.68 | 0.015  | 0.002 | -0.008 | 0.015 |
| rs9964724  | C | 0.32 | 0.018  | 0.002 | -0.005 | 0.016 |
| <b>MS</b>  |   |      |        |       |        |       |
| rs10041724 | T | 0.81 | 0.018  | 0.003 | 0.008  | 0.015 |
| rs10145592 | C | 0.41 | -0.015 | 0.002 | 0.016  | 0.039 |
| rs10189857 | A | 0.57 | -0.020 | 0.002 | -0.007 | 0.014 |
| rs1022785  | G | 0.14 | 0.018  | 0.003 | -0.004 | 0.003 |
| rs10234444 | G | 0.82 | 0.016  | 0.003 | 0.021  | 0.052 |
| rs10246289 | A | 0.11 | 0.019  | 0.003 | -0.017 | 1.966 |
| rs1031423  | T | 0.22 | -0.019 | 0.003 | 0.032  | 0.027 |
| rs10427502 | G | 0.62 | 0.014  | 0.002 | 0.007  | 0.014 |
| rs10737620 | T | 0.27 | 0.014  | 0.002 | 0.009  | 0.035 |
| rs10771746 | C | 0.72 | -0.014 | 0.002 | -0.003 | 0.003 |
| rs10772643 | C | 0.11 | 0.025  | 0.003 | -0.028 | 0.048 |
| rs10876864 | G | 0.43 | -0.013 | 0.002 | -0.011 | 0.405 |
| rs10890123 | C | 0.77 | 0.014  | 0.003 | -0.026 | 0.030 |
| rs10932837 | C | 0.49 | -0.013 | 0.002 | 0.009  | 0.052 |
| rs10940659 | A | 0.53 | -0.013 | 0.002 | 0.013  | 0.069 |
| rs10994943 | T | 0.58 | 0.013  | 0.002 | 0.018  | 0.030 |
| rs11020045 | A | 0.67 | -0.013 | 0.002 | -0.010 | 0.080 |
| rs11130793 | C | 0.60 | 0.013  | 0.002 | -0.005 | 0.008 |
| rs11201422 | T | 0.67 | 0.013  | 0.002 | 0.005  | 0.006 |
| rs11218575 | C | 0.57 | 0.015  | 0.002 | -0.002 | 0.002 |
| rs11245482 | T | 0.61 | -0.013 | 0.002 | -0.015 | 0.044 |
| rs1156541  | C | 0.22 | 0.014  | 0.003 | 0.008  | 0.018 |
| rs11654952 | T | 0.86 | -0.017 | 0.003 | 0.062  | 0.031 |
| rs11657730 | C | 0.64 | 0.013  | 0.002 | -0.013 | 0.026 |
| rs11689199 | A | 0.60 | 0.018  | 0.002 | -0.016 | 0.039 |
| rs11714337 | G | 0.57 | 0.014  | 0.002 | 0.076  | 0.017 |
| rs11763734 | A | 0.51 | -0.012 | 0.002 | 0.012  | 0.105 |
| rs11810109 | A | 0.70 | 0.016  | 0.002 | 0.015  | 0.051 |
| rs12105701 | C | 0.40 | -0.013 | 0.002 | 0.001  | 0.001 |
| rs12272012 | G | 0.96 | -0.030 | 0.005 | -0.063 | 0.061 |
| rs12289262 | C | 0.73 | -0.014 | 0.002 | -0.030 | 0.024 |
| rs1243182  | C | 0.69 | -0.019 | 0.002 | -0.040 | 0.020 |
| rs12476388 | C | 0.71 | 0.013  | 0.002 | 0.019  | 0.042 |
| rs12491503 | G | 0.67 | -0.014 | 0.002 | 0.023  | 0.026 |

|            |   |      |        |       |        |       |
|------------|---|------|--------|-------|--------|-------|
| rs12541615 | T | 0.82 | -0.018 | 0.003 | 0.011  | 0.032 |
| rs12554512 | T | 0.58 | 0.021  | 0.002 | -0.007 | 0.014 |
| rs12725114 | G | 0.80 | 0.015  | 0.003 | 0.008  | 0.015 |
| rs13029509 | G | 0.52 | -0.018 | 0.002 | -0.008 | 0.023 |
| rs13107325 | C | 0.93 | -0.029 | 0.004 | -0.114 | 0.041 |
| rs1421334  | A | 0.45 | 0.017  | 0.002 | 0.002  | 0.001 |
| rs1451533  | G | 0.72 | -0.016 | 0.002 | -0.002 | 0.002 |
| rs17207890 | G | 0.66 | 0.016  | 0.002 | 0.004  | 0.004 |
| rs17379561 | A | 0.86 | -0.025 | 0.003 | 0.024  | 0.046 |
| rs17512836 | T | 0.97 | 0.042  | 0.007 | -0.021 | 0.051 |
| rs17727474 | C | 0.83 | 0.018  | 0.003 | 0.015  | 0.571 |
| rs17789218 | T | 0.76 | 0.019  | 0.003 | -0.033 | 0.025 |
| rs2034768  | A | 0.49 | 0.015  | 0.002 | 0.011  | 0.224 |
| rs2045147  | A | 0.45 | 0.013  | 0.002 | -0.042 | 0.018 |
| rs2073869  | C | 0.83 | 0.019  | 0.003 | -0.004 | 0.004 |
| rs2092829  | G | 0.71 | 0.014  | 0.002 | 0.060  | 0.020 |
| rs2164744  | T | 0.64 | -0.013 | 0.002 | -0.004 | 0.005 |
| rs2173650  | G | 0.85 | 0.018  | 0.003 | 0.004  | 0.004 |
| rs2184364  | A | 0.78 | 0.016  | 0.003 | -0.016 | 0.092 |
| rs2447098  | C | 0.48 | -0.015 | 0.002 | 0.071  | 0.018 |
| rs2460     | G | 0.74 | -0.015 | 0.002 | 0.016  | 0.065 |
| rs2584597  | T | 0.66 | 0.015  | 0.002 | -0.037 | 0.023 |
| rs2616830  | G | 0.46 | 0.016  | 0.002 | 0.000  | 0.000 |
| rs262890   | A | 0.70 | -0.019 | 0.002 | -0.011 | 0.142 |
| rs2717559  | A | 0.56 | 0.012  | 0.002 | 0.018  | 0.039 |
| rs2787374  | T | 0.41 | 0.012  | 0.002 | 0.003  | 0.002 |
| rs303753   | G | 0.65 | -0.014 | 0.002 | -0.008 | 0.024 |
| rs34864022 | A | 0.93 | -0.026 | 0.004 | -0.032 | 0.082 |
| rs35574015 | T | 0.71 | -0.013 | 0.002 | 0.028  | 0.025 |
| rs374722   | G | 0.15 | 0.024  | 0.003 | 0.048  | 0.026 |
| rs3754970  | T | 0.50 | -0.015 | 0.002 | 0.008  | 0.030 |
| rs3796386  | G | 0.57 | -0.026 | 0.002 | -0.007 | 0.014 |
| rs42210    | G | 0.29 | -0.014 | 0.002 | 0.035  | 0.023 |
| rs4334769  | G | 0.47 | 0.012  | 0.002 | -0.018 | 0.029 |
| rs4382592  | T | 0.30 | 0.014  | 0.002 | 0.039  | 0.021 |
| rs4523073  | A | 0.59 | -0.014 | 0.002 | -0.017 | 0.033 |
| rs4577309  | A | 0.47 | 0.016  | 0.002 | 0.035  | 0.019 |
| rs4675246  | G | 0.80 | -0.015 | 0.003 | -0.015 | 0.221 |
| rs4775373  | T | 0.36 | 0.013  | 0.002 | -0.007 | 0.015 |
| rs4845364  | A | 0.50 | -0.015 | 0.002 | 0.001  | 0.000 |
| rs4937842  | G | 0.63 | -0.013 | 0.002 | 0.002  | 0.002 |
| rs4973576  | C | 0.30 | -0.015 | 0.002 | 0.017  | 0.045 |
| rs55700114 | G | 0.71 | -0.014 | 0.002 | 0.005  | 0.008 |
| rs55909997 | G | 0.65 | -0.014 | 0.002 | -0.025 | 0.024 |
| rs56103247 | C | 0.94 | 0.030  | 0.005 | 0.034  | 0.436 |
| rs56858768 | G | 0.70 | -0.015 | 0.002 | -0.030 | 0.023 |
| rs57585211 | T | 0.83 | -0.017 | 0.003 | 0.032  | 0.030 |

|            |   |      |        |       |        |       |
|------------|---|------|--------|-------|--------|-------|
| rs6131281  | C | 0.60 | 0.016  | 0.002 | 0.001  | 0.001 |
| rs6141814  | C | 0.61 | -0.014 | 0.002 | -0.022 | 0.025 |
| rs62379379 | G | 0.93 | -0.026 | 0.004 | -0.014 | 0.030 |
| rs62641636 | A | 0.69 | 0.014  | 0.002 | -0.066 | 0.019 |
| rs6472942  | T | 0.57 | -0.013 | 0.002 | -0.020 | 0.026 |
| rs6673341  | T | 0.47 | -0.015 | 0.002 | 0.019  | 0.028 |
| rs66852340 | C | 0.78 | -0.018 | 0.003 | 0.012  | 0.089 |
| rs6721975  | T | 0.23 | -0.017 | 0.003 | -0.018 | 0.352 |
| rs6797840  | A | 0.46 | -0.016 | 0.002 | 0.015  | 0.047 |
| rs6825241  | C | 0.54 | -0.017 | 0.002 | -0.019 | 0.027 |
| rs6850494  | A | 0.62 | -0.014 | 0.002 | -0.002 | 0.002 |
| rs6905544  | A | 0.40 | -0.019 | 0.002 | -0.027 | 0.021 |
| rs6973656  | A | 0.60 | -0.013 | 0.002 | -0.023 | 0.024 |
| rs6996198  | C | 0.84 | -0.016 | 0.003 | 0.008  | 0.013 |
| rs7089973  | C | 0.62 | -0.013 | 0.002 | -0.030 | 0.022 |
| rs7157001  | A | 0.74 | -0.014 | 0.002 | 0.022  | 0.156 |
| rs71658797 | T | 0.88 | -0.020 | 0.003 | -0.090 | 0.029 |
| rs7184800  | G | 0.70 | 0.017  | 0.002 | -0.002 | 0.001 |
| rs7189927  | T | 0.36 | 0.015  | 0.002 | 0.003  | 0.003 |
| rs7248205  | C | 0.40 | 0.014  | 0.002 | -0.051 | 0.020 |
| rs72671494 | T | 0.86 | -0.017 | 0.003 | -0.045 | 0.063 |
| rs72781699 | G | 0.80 | -0.019 | 0.003 | -0.021 | 0.040 |
| rs72828890 | C | 0.87 | 0.019  | 0.003 | -0.017 | 0.159 |
| rs72834698 | G | 0.86 | 0.023  | 0.003 | -0.006 | 0.006 |
| rs749671   | G | 0.63 | 0.016  | 0.002 | -0.047 | 0.018 |
| rs7564130  | T | 0.64 | -0.015 | 0.002 | 0.006  | 0.009 |
| rs7693082  | G | 0.30 | 0.015  | 0.002 | -0.014 | 0.095 |
| rs7693703  | G | 0.91 | 0.023  | 0.004 | 0.012  | 0.024 |
| rs7700107  | A | 0.86 | -0.021 | 0.003 | 0.003  | 0.002 |
| rs7716447  | A | 0.64 | -0.013 | 0.002 | 0.045  | 0.021 |
| rs7991062  | C | 0.66 | -0.018 | 0.002 | 0.020  | 0.031 |
| rs801733   | A | 0.64 | 0.017  | 0.002 | -0.038 | 0.019 |
| rs8043253  | C | 0.57 | -0.012 | 0.002 | -0.007 | 0.014 |
| rs8756     | C | 0.48 | -0.013 | 0.002 | 0.006  | 0.010 |
| rs9471333  | C | 0.45 | 0.013  | 0.002 | -0.018 | 0.030 |
| rs9563168  | G | 0.79 | 0.018  | 0.003 | 0.016  | 0.072 |
| rs9569734  | A | 0.84 | 0.019  | 0.003 | -0.034 | 0.030 |
| rs9718104  | T | 0.94 | -0.041 | 0.005 | 0.046  | 0.160 |
| rs973734   | C | 0.15 | 0.017  | 0.003 | 0.002  | 0.001 |
| rs9834970  | T | 0.50 | 0.013  | 0.002 | -0.013 | 0.079 |
| rs984409   | G | 0.36 | -0.015 | 0.002 | -0.011 | 0.137 |
| rs9867121  | C | 0.82 | 0.019  | 0.003 | 0.002  | 0.001 |
| rs9902312  | T | 0.68 | 0.015  | 0.002 | 0.003  | 0.003 |
| rs9964724  | C | 0.32 | 0.018  | 0.002 | -0.005 | 0.006 |
| <b>SBP</b> |   |      |        |       |        |       |
| rs10041724 | T | 0.81 | 0.018  | 0.003 | 0.046  | 0.038 |
| rs10054327 | G | 0.58 | 0.017  | 0.002 | -0.174 | 0.031 |

|             |   |      |        |       |        |       |
|-------------|---|------|--------|-------|--------|-------|
| rs10145592  | C | 0.41 | -0.015 | 0.002 | -0.012 | 0.031 |
| rs10189857  | A | 0.57 | -0.020 | 0.002 | 0.024  | 0.031 |
| rs1022785   | G | 0.14 | 0.018  | 0.003 | -0.026 | 0.043 |
| rs10234444  | G | 0.82 | 0.016  | 0.003 | -0.039 | 0.041 |
| rs10246289  | A | 0.11 | 0.019  | 0.003 | 0.022  | 0.047 |
| rs1031423   | T | 0.22 | -0.019 | 0.003 | 0.000  | 0.037 |
| rs10427502  | G | 0.62 | 0.014  | 0.002 | 0.005  | 0.031 |
| rs10737620  | T | 0.27 | 0.014  | 0.002 | 0.160  | 0.034 |
| rs10771746  | C | 0.72 | -0.014 | 0.002 | 0.031  | 0.033 |
| rs10772643  | C | 0.11 | 0.025  | 0.003 | 0.220  | 0.048 |
| rs10876864  | G | 0.43 | -0.013 | 0.002 | -0.117 | 0.030 |
| rs10890123  | C | 0.77 | 0.014  | 0.003 | 0.058  | 0.036 |
| rs10932837  | C | 0.49 | -0.013 | 0.002 | -0.088 | 0.030 |
| rs10940659  | A | 0.53 | -0.013 | 0.002 | 0.036  | 0.031 |
| rs10994943  | T | 0.58 | 0.013  | 0.002 | 0.009  | 0.031 |
| rs11130793  | C | 0.60 | 0.013  | 0.002 | -0.023 | 0.031 |
| rs11201422  | T | 0.67 | 0.013  | 0.002 | 0.048  | 0.032 |
| rs11218575  | C | 0.57 | 0.015  | 0.002 | -0.075 | 0.031 |
| rs11245482  | T | 0.61 | -0.013 | 0.002 | -0.097 | 0.031 |
| rs114328297 | T | 0.78 | 0.014  | 0.003 | -0.042 | 0.037 |
| rs1156541   | C | 0.22 | 0.014  | 0.003 | -0.014 | 0.036 |
| rs11654952  | T | 0.86 | -0.017 | 0.003 | -0.088 | 0.045 |
| rs11657730  | C | 0.64 | 0.013  | 0.002 | 0.194  | 0.033 |
| rs11689199  | A | 0.60 | 0.018  | 0.002 | -0.070 | 0.031 |
| rs11714337  | G | 0.57 | 0.014  | 0.002 | 0.065  | 0.031 |
| rs11763734  | A | 0.51 | -0.012 | 0.002 | -0.060 | 0.030 |
| rs11810109  | A | 0.70 | 0.016  | 0.002 | -0.065 | 0.033 |
| rs12105701  | C | 0.40 | -0.013 | 0.002 | 0.014  | 0.031 |
| rs12272012  | G | 0.96 | -0.030 | 0.005 | -0.155 | 0.075 |
| rs12289262  | C | 0.73 | -0.014 | 0.002 | 0.054  | 0.034 |
| rs1243182   | C | 0.69 | -0.019 | 0.002 | -0.067 | 0.033 |
| rs12491503  | G | 0.67 | -0.014 | 0.002 | -0.044 | 0.032 |
| rs12541615  | T | 0.82 | -0.018 | 0.003 | -0.094 | 0.039 |
| rs12554512  | T | 0.58 | 0.021  | 0.002 | 0.003  | 0.031 |
| rs12725114  | G | 0.80 | 0.015  | 0.003 | 0.084  | 0.037 |
| rs1278847   | C | 0.69 | 0.016  | 0.002 | -0.060 | 0.033 |
| rs13029509  | G | 0.52 | -0.018 | 0.002 | -0.107 | 0.030 |
| rs13107325  | C | 0.93 | -0.029 | 0.004 | 0.909  | 0.059 |
| rs138256022 | C | 0.96 | -0.031 | 0.006 | -0.181 | 0.084 |
| rs1421334   | A | 0.45 | 0.017  | 0.002 | 0.077  | 0.031 |
| rs1451533   | G | 0.72 | -0.016 | 0.002 | -0.022 | 0.034 |
| rs17207890  | G | 0.66 | 0.016  | 0.002 | 0.043  | 0.032 |
| rs17379561  | A | 0.86 | -0.025 | 0.003 | 0.070  | 0.043 |
| rs17512836  | T | 0.97 | 0.042  | 0.007 | -0.180 | 0.093 |
| rs17727474  | C | 0.83 | 0.018  | 0.003 | -0.069 | 0.041 |
| rs17789218  | T | 0.76 | 0.019  | 0.003 | 0.117  | 0.036 |
| rs2034768   | A | 0.49 | 0.015  | 0.002 | -0.013 | 0.030 |

|            |   |      |        |       |        |       |
|------------|---|------|--------|-------|--------|-------|
| rs2045147  | A | 0.45 | 0.013  | 0.002 | 0.008  | 0.030 |
| rs2073869  | C | 0.83 | 0.019  | 0.003 | -0.101 | 0.040 |
| rs2164744  | T | 0.64 | -0.013 | 0.002 | 0.073  | 0.031 |
| rs2173650  | G | 0.85 | 0.018  | 0.003 | -0.046 | 0.043 |
| rs2447098  | C | 0.48 | -0.015 | 0.002 | -0.056 | 0.030 |
| rs2460     | G | 0.74 | -0.015 | 0.002 | -0.109 | 0.034 |
| rs2616830  | G | 0.46 | 0.016  | 0.002 | 0.017  | 0.030 |
| rs262890   | A | 0.70 | -0.019 | 0.002 | -0.016 | 0.033 |
| rs2717559  | A | 0.56 | 0.012  | 0.002 | -0.038 | 0.032 |
| rs2787374  | T | 0.41 | 0.012  | 0.002 | -0.041 | 0.030 |
| rs303753   | G | 0.65 | -0.014 | 0.002 | -0.080 | 0.032 |
| rs34864022 | A | 0.93 | -0.026 | 0.004 | 0.089  | 0.062 |
| rs35574015 | T | 0.71 | -0.013 | 0.002 | -0.070 | 0.033 |
| rs374722   | G | 0.15 | 0.024  | 0.003 | 0.052  | 0.042 |
| rs3754970  | T | 0.50 | -0.015 | 0.002 | -0.080 | 0.030 |
| rs3796386  | G | 0.57 | -0.026 | 0.002 | -0.062 | 0.031 |
| rs42210    | G | 0.29 | -0.014 | 0.002 | 0.019  | 0.034 |
| rs4334769  | G | 0.47 | 0.012  | 0.002 | -0.057 | 0.030 |
| rs4382592  | T | 0.30 | 0.014  | 0.002 | -0.035 | 0.033 |
| rs4523073  | A | 0.59 | -0.014 | 0.002 | 0.060  | 0.031 |
| rs4577309  | A | 0.47 | 0.016  | 0.002 | 0.167  | 0.030 |
| rs4675246  | G | 0.80 | -0.015 | 0.003 | 0.038  | 0.038 |
| rs4775373  | T | 0.36 | 0.013  | 0.002 | 0.073  | 0.031 |
| rs4845364  | A | 0.50 | -0.015 | 0.002 | 0.035  | 0.030 |
| rs4937842  | G | 0.63 | -0.013 | 0.002 | 0.050  | 0.031 |
| rs4973576  | C | 0.30 | -0.015 | 0.002 | 0.083  | 0.033 |
| rs55700114 | G | 0.71 | -0.014 | 0.002 | -0.002 | 0.033 |
| rs56103247 | C | 0.94 | 0.030  | 0.005 | -0.065 | 0.072 |
| rs56858768 | G | 0.70 | -0.015 | 0.002 | -0.018 | 0.033 |
| rs57585211 | T | 0.83 | -0.017 | 0.003 | -0.021 | 0.040 |
| rs6131281  | C | 0.60 | 0.016  | 0.002 | 0.136  | 0.031 |
| rs6141814  | C | 0.61 | -0.014 | 0.002 | -0.136 | 0.031 |
| rs62379379 | G | 0.93 | -0.026 | 0.004 | -0.154 | 0.059 |
| rs62641636 | A | 0.69 | 0.014  | 0.002 | 0.001  | 0.033 |
| rs6472942  | T | 0.57 | -0.013 | 0.002 | 0.251  | 0.031 |
| rs6673341  | T | 0.47 | -0.015 | 0.002 | -0.121 | 0.031 |
| rs6797840  | A | 0.46 | -0.016 | 0.002 | 0.032  | 0.030 |
| rs6825241  | C | 0.54 | -0.017 | 0.002 | -0.109 | 0.030 |
| rs6850494  | A | 0.62 | -0.014 | 0.002 | 0.001  | 0.031 |
| rs6905544  | A | 0.40 | -0.019 | 0.002 | -0.122 | 0.031 |
| rs6973656  | A | 0.60 | -0.013 | 0.002 | 0.126  | 0.031 |
| rs6996198  | C | 0.84 | -0.016 | 0.003 | -0.163 | 0.041 |
| rs7089973  | C | 0.62 | -0.013 | 0.002 | -0.111 | 0.031 |
| rs7157001  | A | 0.74 | -0.014 | 0.002 | -0.021 | 0.037 |
| rs71658797 | T | 0.88 | -0.020 | 0.003 | 0.206  | 0.047 |
| rs7184800  | G | 0.70 | 0.017  | 0.002 | 0.111  | 0.033 |
| rs7189927  | T | 0.36 | 0.015  | 0.002 | 0.020  | 0.032 |

|             |   |      |        |       |        |       |
|-------------|---|------|--------|-------|--------|-------|
| rs7248205   | C | 0.40 | 0.014  | 0.002 | -0.111 | 0.031 |
| rs72671494  | T | 0.86 | -0.017 | 0.003 | 0.147  | 0.046 |
| rs72781699  | G | 0.80 | -0.019 | 0.003 | -0.050 | 0.038 |
| rs72828890  | C | 0.87 | 0.019  | 0.003 | 0.065  | 0.048 |
| rs72834698  | G | 0.86 | 0.023  | 0.003 | 0.082  | 0.044 |
| rs749671    | G | 0.63 | 0.016  | 0.002 | 0.108  | 0.031 |
| rs7564130   | T | 0.64 | -0.015 | 0.002 | -0.019 | 0.031 |
| rs7693082   | G | 0.30 | 0.015  | 0.002 | 0.022  | 0.033 |
| rs7693703   | G | 0.91 | 0.023  | 0.004 | 0.020  | 0.053 |
| rs7700107   | A | 0.86 | -0.021 | 0.003 | -0.219 | 0.044 |
| rs77215114  | A | 0.93 | 0.024  | 0.004 | -0.047 | 0.062 |
| rs801733    | A | 0.64 | 0.017  | 0.002 | 0.007  | 0.031 |
| rs8043253   | C | 0.57 | -0.012 | 0.002 | -0.240 | 0.030 |
| rs8756      | C | 0.48 | -0.013 | 0.002 | -0.239 | 0.030 |
| rs9471333   | C | 0.45 | 0.013  | 0.002 | -0.009 | 0.030 |
| rs9563168   | G | 0.79 | 0.018  | 0.003 | 0.139  | 0.037 |
| rs9718104   | T | 0.94 | -0.041 | 0.005 | -0.138 | 0.068 |
| rs973734    | C | 0.15 | 0.017  | 0.003 | 0.053  | 0.042 |
| rs9834970   | T | 0.50 | 0.013  | 0.002 | 0.095  | 0.030 |
| rs984409    | G | 0.36 | -0.015 | 0.002 | -0.161 | 0.032 |
| rs9867121   | C | 0.82 | 0.019  | 0.003 | -0.043 | 0.040 |
| rs9902312   | T | 0.68 | 0.015  | 0.002 | 0.077  | 0.032 |
| rs9964724   | C | 0.32 | 0.018  | 0.002 | 0.041  | 0.032 |
| <b>DBP</b>  |   |      |        |       |        |       |
| rs10041724  | T | 0.81 | 0.018  | 0.003 | 0.014  | 0.022 |
| rs10054327  | G | 0.58 | 0.017  | 0.002 | -0.098 | 0.018 |
| rs10145592  | C | 0.41 | -0.015 | 0.002 | -0.025 | 0.018 |
| rs10189857  | A | 0.57 | -0.020 | 0.002 | -0.028 | 0.018 |
| rs1022785   | G | 0.14 | 0.018  | 0.003 | -0.011 | 0.025 |
| rs10234444  | G | 0.82 | 0.016  | 0.003 | 0.013  | 0.023 |
| rs10246289  | A | 0.11 | 0.019  | 0.003 | 0.009  | 0.027 |
| rs1031423   | T | 0.22 | -0.019 | 0.003 | -0.013 | 0.021 |
| rs10427502  | G | 0.62 | 0.014  | 0.002 | -0.056 | 0.018 |
| rs10737620  | T | 0.27 | 0.014  | 0.002 | 0.091  | 0.019 |
| rs10771746  | C | 0.72 | -0.014 | 0.002 | -0.026 | 0.019 |
| rs10772643  | C | 0.11 | 0.025  | 0.003 | 0.116  | 0.028 |
| rs10876864  | G | 0.43 | -0.013 | 0.002 | -0.084 | 0.018 |
| rs10890123  | C | 0.77 | 0.014  | 0.003 | 0.024  | 0.021 |
| rs10932837  | C | 0.49 | -0.013 | 0.002 | -0.046 | 0.017 |
| rs10940659  | A | 0.53 | -0.013 | 0.002 | 0.016  | 0.018 |
| rs10994943  | T | 0.58 | 0.013  | 0.002 | 0.060  | 0.018 |
| rs11130793  | C | 0.60 | 0.013  | 0.002 | -0.031 | 0.018 |
| rs11201422  | T | 0.67 | 0.013  | 0.002 | 0.024  | 0.019 |
| rs11218575  | C | 0.57 | 0.015  | 0.002 | -0.043 | 0.018 |
| rs11245482  | T | 0.61 | -0.013 | 0.002 | -0.076 | 0.018 |
| rs114328297 | T | 0.78 | 0.014  | 0.003 | -0.010 | 0.021 |
| rs1156541   | C | 0.22 | 0.014  | 0.003 | -0.001 | 0.021 |

|             |   |      |        |       |        |       |
|-------------|---|------|--------|-------|--------|-------|
| rs11654952  | T | 0.86 | -0.017 | 0.003 | -0.025 | 0.026 |
| rs11657730  | C | 0.64 | 0.013  | 0.002 | 0.107  | 0.019 |
| rs11689199  | A | 0.60 | 0.018  | 0.002 | -0.044 | 0.018 |
| rs11714337  | G | 0.57 | 0.014  | 0.002 | 0.023  | 0.018 |
| rs11763734  | A | 0.51 | -0.012 | 0.002 | -0.020 | 0.017 |
| rs11810109  | A | 0.70 | 0.016  | 0.002 | -0.080 | 0.019 |
| rs12105701  | C | 0.40 | -0.013 | 0.002 | 0.002  | 0.018 |
| rs12272012  | G | 0.96 | -0.030 | 0.005 | -0.082 | 0.043 |
| rs12289262  | C | 0.73 | -0.014 | 0.002 | 0.039  | 0.020 |
| rs1243182   | C | 0.69 | -0.019 | 0.002 | -0.049 | 0.019 |
| rs12491503  | G | 0.67 | -0.014 | 0.002 | -0.014 | 0.018 |
| rs12541615  | T | 0.82 | -0.018 | 0.003 | -0.103 | 0.022 |
| rs12554512  | T | 0.58 | 0.021  | 0.002 | -0.001 | 0.018 |
| rs12725114  | G | 0.80 | 0.015  | 0.003 | 0.041  | 0.022 |
| rs1278847   | C | 0.69 | 0.016  | 0.002 | 0.000  | 0.019 |
| rs13029509  | G | 0.52 | -0.018 | 0.002 | -0.037 | 0.017 |
| rs13107325  | C | 0.93 | -0.029 | 0.004 | 0.675  | 0.034 |
| rs138256022 | C | 0.96 | -0.031 | 0.006 | -0.075 | 0.048 |
| rs1421334   | A | 0.45 | 0.017  | 0.002 | 0.043  | 0.018 |
| rs1451533   | G | 0.72 | -0.016 | 0.002 | -0.029 | 0.020 |
| rs17207890  | G | 0.66 | 0.016  | 0.002 | 0.035  | 0.018 |
| rs17379561  | A | 0.86 | -0.025 | 0.003 | 0.034  | 0.025 |
| rs17512836  | T | 0.97 | 0.042  | 0.007 | -0.143 | 0.054 |
| rs17727474  | C | 0.83 | 0.018  | 0.003 | -0.030 | 0.023 |
| rs17789218  | T | 0.76 | 0.019  | 0.003 | 0.125  | 0.021 |
| rs2034768   | A | 0.49 | 0.015  | 0.002 | 0.006  | 0.017 |
| rs2045147   | A | 0.45 | 0.013  | 0.002 | -0.016 | 0.017 |
| rs2073869   | C | 0.83 | 0.019  | 0.003 | -0.030 | 0.023 |
| rs2164744   | T | 0.64 | -0.013 | 0.002 | 0.042  | 0.018 |
| rs2173650   | G | 0.85 | 0.018  | 0.003 | -0.028 | 0.025 |
| rs2447098   | C | 0.48 | -0.015 | 0.002 | -0.020 | 0.018 |
| rs2460      | G | 0.74 | -0.015 | 0.002 | -0.061 | 0.020 |
| rs2616830   | G | 0.46 | 0.016  | 0.002 | 0.027  | 0.017 |
| rs262890    | A | 0.70 | -0.019 | 0.002 | -0.019 | 0.019 |
| rs2717559   | A | 0.56 | 0.012  | 0.002 | -0.015 | 0.018 |
| rs2787374   | T | 0.41 | 0.012  | 0.002 | 0.007  | 0.018 |
| rs303753    | G | 0.65 | -0.014 | 0.002 | -0.062 | 0.018 |
| rs34864022  | A | 0.93 | -0.026 | 0.004 | 0.003  | 0.036 |
| rs35574015  | T | 0.71 | -0.013 | 0.002 | -0.038 | 0.019 |
| rs374722    | G | 0.15 | 0.024  | 0.003 | 0.035  | 0.024 |
| rs3754970   | T | 0.50 | -0.015 | 0.002 | -0.027 | 0.017 |
| rs3796386   | G | 0.57 | -0.026 | 0.002 | -0.061 | 0.018 |
| rs42210     | G | 0.29 | -0.014 | 0.002 | -0.009 | 0.019 |
| rs4334769   | G | 0.47 | 0.012  | 0.002 | -0.022 | 0.017 |
| rs4382592   | T | 0.30 | 0.014  | 0.002 | -0.015 | 0.019 |
| rs4523073   | A | 0.59 | -0.014 | 0.002 | 0.015  | 0.018 |
| rs4577309   | A | 0.47 | 0.016  | 0.002 | 0.093  | 0.017 |



|            |   |      |        |       |        |       |
|------------|---|------|--------|-------|--------|-------|
| rs4675246  | G | 0.80 | -0.015 | 0.003 | -0.014 | 0.022 |
| rs4775373  | T | 0.36 | 0.013  | 0.002 | 0.050  | 0.018 |
| rs4845364  | A | 0.50 | -0.015 | 0.002 | 0.099  | 0.017 |
| rs4937842  | G | 0.63 | -0.013 | 0.002 | 0.019  | 0.018 |
| rs4973576  | C | 0.30 | -0.015 | 0.002 | 0.038  | 0.019 |
| rs55700114 | G | 0.71 | -0.014 | 0.002 | -0.008 | 0.019 |
| rs56103247 | C | 0.94 | 0.030  | 0.005 | 0.047  | 0.041 |
| rs56858768 | G | 0.70 | -0.015 | 0.002 | -0.016 | 0.019 |
| rs57585211 | T | 0.83 | -0.017 | 0.003 | -0.020 | 0.023 |
| rs6131281  | C | 0.60 | 0.016  | 0.002 | 0.121  | 0.018 |
| rs6141814  | C | 0.61 | -0.014 | 0.002 | -0.025 | 0.018 |
| rs62379379 | G | 0.93 | -0.026 | 0.004 | -0.020 | 0.034 |
| rs62641636 | A | 0.69 | 0.014  | 0.002 | -0.002 | 0.019 |
| rs6472942  | T | 0.57 | -0.013 | 0.002 | 0.069  | 0.018 |
| rs6673341  | T | 0.47 | -0.015 | 0.002 | -0.052 | 0.018 |
| rs6797840  | A | 0.46 | -0.016 | 0.002 | 0.004  | 0.018 |
| rs6825241  | C | 0.54 | -0.017 | 0.002 | -0.078 | 0.017 |
| rs6850494  | A | 0.62 | -0.014 | 0.002 | 0.028  | 0.018 |
| rs6905544  | A | 0.40 | -0.019 | 0.002 | -0.064 | 0.018 |
| rs6973656  | A | 0.60 | -0.013 | 0.002 | 0.040  | 0.018 |
| rs6996198  | C | 0.84 | -0.016 | 0.003 | -0.060 | 0.024 |
| rs7089973  | C | 0.62 | -0.013 | 0.002 | -0.063 | 0.018 |
| rs7157001  | A | 0.74 | -0.014 | 0.002 | -0.020 | 0.021 |
| rs71658797 | T | 0.88 | -0.020 | 0.003 | 0.225  | 0.027 |
| rs7184800  | G | 0.70 | 0.017  | 0.002 | 0.075  | 0.019 |
| rs7189927  | T | 0.36 | 0.015  | 0.002 | 0.002  | 0.018 |
| rs7248205  | C | 0.40 | 0.014  | 0.002 | -0.025 | 0.018 |
| rs72671494 | T | 0.86 | -0.017 | 0.003 | 0.071  | 0.026 |
| rs72781699 | G | 0.80 | -0.019 | 0.003 | -0.031 | 0.022 |
| rs72828890 | C | 0.87 | 0.019  | 0.003 | 0.037  | 0.028 |
| rs72834698 | G | 0.86 | 0.023  | 0.003 | 0.052  | 0.025 |
| rs749671   | G | 0.63 | 0.016  | 0.002 | 0.088  | 0.018 |
| rs7564130  | T | 0.64 | -0.015 | 0.002 | -0.027 | 0.018 |
| rs7693082  | G | 0.30 | 0.015  | 0.002 | 0.006  | 0.019 |
| rs7693703  | G | 0.91 | 0.023  | 0.004 | 0.031  | 0.030 |
| rs7700107  | A | 0.86 | -0.021 | 0.003 | -0.121 | 0.026 |
| rs77215114 | A | 0.93 | 0.024  | 0.004 | -0.036 | 0.036 |
| rs801733   | A | 0.64 | 0.017  | 0.002 | -0.004 | 0.018 |
| rs8043253  | C | 0.57 | -0.012 | 0.002 | -0.156 | 0.018 |
| rs8756     | C | 0.48 | -0.013 | 0.002 | -0.067 | 0.017 |
| rs9471333  | C | 0.45 | 0.013  | 0.002 | -0.032 | 0.017 |
| rs9563168  | G | 0.79 | 0.018  | 0.003 | 0.041  | 0.021 |
| rs9718104  | T | 0.94 | -0.041 | 0.005 | -0.106 | 0.039 |
| rs973734   | C | 0.15 | 0.017  | 0.003 | -0.014 | 0.024 |
| rs9834970  | T | 0.50 | 0.013  | 0.002 | 0.007  | 0.017 |
| rs984409   | G | 0.36 | -0.015 | 0.002 | -0.073 | 0.018 |
| rs9867121  | C | 0.82 | 0.019  | 0.003 | 0.020  | 0.023 |

|             |   |      |        |       |        |       |
|-------------|---|------|--------|-------|--------|-------|
| rs9902312   | T | 0.68 | 0.015  | 0.002 | 0.017  | 0.019 |
| rs9964724   | C | 0.32 | 0.018  | 0.002 | 0.002  | 0.019 |
| <b>PP</b>   |   |      |        |       |        |       |
| rs10041724  | T | 0.81 | 0.018  | 0.003 | 0.023  | 0.026 |
| rs10054327  | G | 0.58 | 0.017  | 0.002 | -0.076 | 0.021 |
| rs10145592  | C | 0.41 | -0.015 | 0.002 | 0.021  | 0.021 |
| rs10189857  | A | 0.57 | -0.020 | 0.002 | 0.049  | 0.021 |
| rs1022785   | G | 0.14 | 0.018  | 0.003 | -0.018 | 0.029 |
| rs10234444  | G | 0.82 | 0.016  | 0.003 | -0.067 | 0.028 |
| rs10246289  | A | 0.11 | 0.019  | 0.003 | 0.005  | 0.032 |
| rs1031423   | T | 0.22 | -0.019 | 0.003 | 0.014  | 0.025 |
| rs10427502  | G | 0.62 | 0.014  | 0.002 | 0.057  | 0.021 |
| rs10737620  | T | 0.27 | 0.014  | 0.002 | 0.074  | 0.023 |
| rs10771746  | C | 0.72 | -0.014 | 0.002 | 0.051  | 0.023 |
| rs10772643  | C | 0.11 | 0.025  | 0.003 | 0.113  | 0.033 |
| rs10876864  | G | 0.43 | -0.013 | 0.002 | -0.036 | 0.021 |
| rs10890123  | C | 0.77 | 0.014  | 0.003 | 0.041  | 0.025 |
| rs10932837  | C | 0.49 | -0.013 | 0.002 | -0.032 | 0.021 |
| rs10940659  | A | 0.53 | -0.013 | 0.002 | 0.018  | 0.021 |
| rs10994943  | T | 0.58 | 0.013  | 0.002 | -0.054 | 0.021 |
| rs11130793  | C | 0.60 | 0.013  | 0.002 | 0.013  | 0.021 |
| rs11201422  | T | 0.67 | 0.013  | 0.002 | 0.024  | 0.022 |
| rs11218575  | C | 0.57 | 0.015  | 0.002 | -0.035 | 0.021 |
| rs11245482  | T | 0.61 | -0.013 | 0.002 | -0.017 | 0.021 |
| rs114328297 | T | 0.78 | 0.014  | 0.003 | -0.025 | 0.025 |
| rs1156541   | C | 0.22 | 0.014  | 0.003 | -0.012 | 0.025 |
| rs11654952  | T | 0.86 | -0.017 | 0.003 | -0.065 | 0.031 |
| rs11657730  | C | 0.64 | 0.013  | 0.002 | 0.093  | 0.023 |
| rs11689199  | A | 0.60 | 0.018  | 0.002 | -0.026 | 0.021 |
| rs11714337  | G | 0.57 | 0.014  | 0.002 | 0.042  | 0.021 |
| rs11763734  | A | 0.51 | -0.012 | 0.002 | -0.040 | 0.021 |
| rs11810109  | A | 0.70 | 0.016  | 0.002 | 0.011  | 0.022 |
| rs12105701  | C | 0.40 | -0.013 | 0.002 | 0.011  | 0.021 |
| rs12272012  | G | 0.96 | -0.030 | 0.005 | -0.088 | 0.051 |
| rs12289262  | C | 0.73 | -0.014 | 0.002 | 0.020  | 0.023 |
| rs1243182   | C | 0.69 | -0.019 | 0.002 | -0.019 | 0.022 |
| rs12491503  | G | 0.67 | -0.014 | 0.002 | -0.025 | 0.022 |
| rs12541615  | T | 0.82 | -0.018 | 0.003 | 0.004  | 0.027 |
| rs12554512  | T | 0.58 | 0.021  | 0.002 | 0.007  | 0.021 |
| rs12725114  | G | 0.80 | 0.015  | 0.003 | 0.038  | 0.025 |
| rs1278847   | C | 0.69 | 0.016  | 0.002 | -0.061 | 0.022 |
| rs13029509  | G | 0.52 | -0.018 | 0.002 | -0.066 | 0.021 |
| rs13107325  | C | 0.93 | -0.029 | 0.004 | 0.253  | 0.040 |
| rs138256022 | C | 0.96 | -0.031 | 0.006 | -0.125 | 0.057 |
| rs1421334   | A | 0.45 | 0.017  | 0.002 | 0.034  | 0.021 |
| rs1451533   | G | 0.72 | -0.016 | 0.002 | 0.013  | 0.023 |
| rs17207890  | G | 0.66 | 0.016  | 0.002 | 0.009  | 0.022 |

|            |   |      |        |       |        |       |
|------------|---|------|--------|-------|--------|-------|
| rs17379561 | A | 0.86 | -0.025 | 0.003 | 0.050  | 0.029 |
| rs17512836 | T | 0.97 | 0.042  | 0.007 | -0.061 | 0.063 |
| rs17727474 | C | 0.83 | 0.018  | 0.003 | -0.037 | 0.028 |
| rs17789218 | T | 0.76 | 0.019  | 0.003 | -0.005 | 0.024 |
| rs2034768  | A | 0.49 | 0.015  | 0.002 | -0.015 | 0.021 |
| rs2045147  | A | 0.45 | 0.013  | 0.002 | 0.022  | 0.021 |
| rs2073869  | C | 0.83 | 0.019  | 0.003 | -0.074 | 0.027 |
| rs2164744  | T | 0.64 | -0.013 | 0.002 | 0.033  | 0.021 |
| rs2173650  | G | 0.85 | 0.018  | 0.003 | -0.027 | 0.029 |
| rs2447098  | C | 0.48 | -0.015 | 0.002 | -0.040 | 0.021 |
| rs2460     | G | 0.74 | -0.015 | 0.002 | -0.047 | 0.024 |
| rs2616830  | G | 0.46 | 0.016  | 0.002 | -0.007 | 0.020 |
| rs262890   | A | 0.70 | -0.019 | 0.002 | -0.006 | 0.022 |
| rs2717559  | A | 0.56 | 0.012  | 0.002 | -0.026 | 0.021 |
| rs2787374  | T | 0.41 | 0.012  | 0.002 | -0.044 | 0.021 |
| rs303753   | G | 0.65 | -0.014 | 0.002 | -0.016 | 0.022 |
| rs34864022 | A | 0.93 | -0.026 | 0.004 | 0.066  | 0.042 |
| rs35574015 | T | 0.71 | -0.013 | 0.002 | -0.038 | 0.023 |
| rs374722   | G | 0.15 | 0.024  | 0.003 | 0.011  | 0.029 |
| rs3754970  | T | 0.50 | -0.015 | 0.002 | -0.049 | 0.021 |
| rs3796386  | G | 0.57 | -0.026 | 0.002 | -0.012 | 0.021 |
| rs42210    | G | 0.29 | -0.014 | 0.002 | 0.041  | 0.023 |
| rs4334769  | G | 0.47 | 0.012  | 0.002 | -0.034 | 0.021 |
| rs4382592  | T | 0.30 | 0.014  | 0.002 | -0.011 | 0.022 |
| rs4523073  | A | 0.59 | -0.014 | 0.002 | 0.052  | 0.021 |
| rs4577309  | A | 0.47 | 0.016  | 0.002 | 0.069  | 0.021 |
| rs4675246  | G | 0.80 | -0.015 | 0.003 | 0.048  | 0.026 |
| rs4775373  | T | 0.36 | 0.013  | 0.002 | 0.030  | 0.021 |
| rs4845364  | A | 0.50 | -0.015 | 0.002 | -0.051 | 0.021 |
| rs4937842  | G | 0.63 | -0.013 | 0.002 | 0.027  | 0.021 |
| rs4973576  | C | 0.30 | -0.015 | 0.002 | 0.043  | 0.023 |
| rs55700114 | G | 0.71 | -0.014 | 0.002 | 0.015  | 0.022 |
| rs56103247 | C | 0.94 | 0.030  | 0.005 | -0.120 | 0.049 |
| rs56858768 | G | 0.70 | -0.015 | 0.002 | -0.014 | 0.022 |
| rs57585211 | T | 0.83 | -0.017 | 0.003 | -0.007 | 0.027 |
| rs6131281  | C | 0.60 | 0.016  | 0.002 | 0.023  | 0.021 |
| rs6141814  | C | 0.61 | -0.014 | 0.002 | -0.112 | 0.021 |
| rs62379379 | G | 0.93 | -0.026 | 0.004 | -0.156 | 0.040 |
| rs62641636 | A | 0.69 | 0.014  | 0.002 | 0.017  | 0.023 |
| rs6472942  | T | 0.57 | -0.013 | 0.002 | 0.181  | 0.021 |
| rs6673341  | T | 0.47 | -0.015 | 0.002 | -0.073 | 0.021 |
| rs6797840  | A | 0.46 | -0.016 | 0.002 | 0.025  | 0.021 |
| rs6825241  | C | 0.54 | -0.017 | 0.002 | -0.026 | 0.021 |
| rs6850494  | A | 0.62 | -0.014 | 0.002 | -0.028 | 0.021 |
| rs6905544  | A | 0.40 | -0.019 | 0.002 | -0.058 | 0.021 |
| rs6973656  | A | 0.60 | -0.013 | 0.002 | 0.088  | 0.021 |
| rs6996198  | C | 0.84 | -0.016 | 0.003 | -0.112 | 0.028 |

|            |   |      |        |       |        |       |
|------------|---|------|--------|-------|--------|-------|
| rs7089973  | C | 0.62 | -0.013 | 0.002 | -0.055 | 0.021 |
| rs7157001  | A | 0.74 | -0.014 | 0.002 | 0.000  | 0.025 |
| rs71658797 | T | 0.88 | -0.020 | 0.003 | -0.008 | 0.032 |
| rs7184800  | G | 0.70 | 0.017  | 0.002 | 0.031  | 0.022 |
| rs7189927  | T | 0.36 | 0.015  | 0.002 | 0.015  | 0.022 |
| rs7248205  | C | 0.40 | 0.014  | 0.002 | -0.090 | 0.021 |
| rs72671494 | T | 0.86 | -0.017 | 0.003 | 0.087  | 0.031 |
| rs72781699 | G | 0.80 | -0.019 | 0.003 | -0.007 | 0.026 |
| rs72828890 | C | 0.87 | 0.019  | 0.003 | 0.033  | 0.033 |
| rs72834698 | G | 0.86 | 0.023  | 0.003 | 0.039  | 0.030 |
| rs749671   | G | 0.63 | 0.016  | 0.002 | 0.009  | 0.021 |
| rs7564130  | T | 0.64 | -0.015 | 0.002 | 0.002  | 0.021 |
| rs7693082  | G | 0.30 | 0.015  | 0.002 | 0.012  | 0.022 |
| rs7693703  | G | 0.91 | 0.023  | 0.004 | -0.011 | 0.036 |
| rs7700107  | A | 0.86 | -0.021 | 0.003 | -0.094 | 0.030 |
| rs77215114 | A | 0.93 | 0.024  | 0.004 | 0.020  | 0.042 |
| rs801733   | A | 0.64 | 0.017  | 0.002 | 0.006  | 0.021 |
| rs8043253  | C | 0.57 | -0.012 | 0.002 | -0.087 | 0.021 |
| rs8756     | C | 0.48 | -0.013 | 0.002 | -0.179 | 0.020 |
| rs9471333  | C | 0.45 | 0.013  | 0.002 | 0.028  | 0.021 |
| rs9563168  | G | 0.79 | 0.018  | 0.003 | 0.093  | 0.025 |
| rs9718104  | T | 0.94 | -0.041 | 0.005 | -0.046 | 0.046 |
| rs973734   | C | 0.15 | 0.017  | 0.003 | 0.058  | 0.028 |
| rs9834970  | T | 0.50 | 0.013  | 0.002 | 0.080  | 0.021 |
| rs984409   | G | 0.36 | -0.015 | 0.002 | -0.086 | 0.021 |
| rs9867121  | C | 0.82 | 0.019  | 0.003 | -0.069 | 0.027 |
| rs9902312  | T | 0.68 | 0.015  | 0.002 | 0.057  | 0.022 |
| rs9964724  | C | 0.32 | 0.018  | 0.002 | 0.042  | 0.022 |

### HDL-C

|            |   |      |        |       |        |       |
|------------|---|------|--------|-------|--------|-------|
| rs7089973  | C | 0.62 | -0.013 | 0.002 | -0.014 | 0.005 |
| rs11245482 | T | 0.61 | -0.013 | 0.002 | 0.009  | 0.005 |
| rs17727474 | C | 0.83 | 0.018  | 0.003 | 0.000  | 0.006 |
| rs1243182  | C | 0.69 | -0.019 | 0.002 | 0.008  | 0.005 |
| rs2045147  | A | 0.45 | 0.013  | 0.002 | -0.007 | 0.005 |
| rs11201422 | T | 0.67 | 0.013  | 0.002 | -0.008 | 0.005 |
| rs11218575 | C | 0.57 | 0.015  | 0.002 | -0.011 | 0.005 |
| rs12289262 | C | 0.73 | -0.014 | 0.002 | 0.004  | 0.005 |
| rs4845364  | A | 0.50 | -0.015 | 0.002 | 0.003  | 0.005 |
| rs801733   | A | 0.64 | 0.017  | 0.002 | -0.011 | 0.004 |
| rs6673341  | T | 0.47 | -0.015 | 0.002 | -0.004 | 0.005 |
| rs17207890 | G | 0.66 | 0.016  | 0.002 | 0.006  | 0.005 |
| rs10876864 | G | 0.43 | -0.013 | 0.002 | 0.005  | 0.005 |
| rs8756     | C | 0.48 | -0.013 | 0.002 | -0.002 | 0.003 |
| rs9563168  | G | 0.79 | 0.018  | 0.003 | -0.014 | 0.006 |
| rs9528023  | C | 0.72 | 0.013  | 0.002 | -0.001 | 0.006 |
| rs1022785  | G | 0.14 | 0.018  | 0.003 | -0.010 | 0.007 |
| rs8043253  | C | 0.57 | -0.012 | 0.002 | 0.003  | 0.005 |

|            |   |      |        |       |        |       |
|------------|---|------|--------|-------|--------|-------|
| rs2460     | G | 0.74 | -0.015 | 0.002 | 0.005  | 0.006 |
| rs7189927  | T | 0.36 | 0.015  | 0.002 | -0.012 | 0.004 |
| rs749671   | G | 0.63 | 0.016  | 0.002 | -0.007 | 0.004 |
| rs2447098  | C | 0.48 | -0.015 | 0.002 | -0.008 | 0.005 |
| rs11654952 | T | 0.86 | -0.017 | 0.003 | -0.015 | 0.007 |
| rs2584597  | T | 0.66 | 0.015  | 0.002 | -0.006 | 0.005 |
| rs9902312  | T | 0.68 | 0.015  | 0.002 | 0.005  | 0.005 |
| rs303753   | G | 0.65 | -0.014 | 0.002 | 0.005  | 0.005 |
| rs11081851 | G | 0.44 | -0.013 | 0.002 | 0.005  | 0.005 |
| rs9964724  | C | 0.32 | 0.018  | 0.002 | 0.000  | 0.005 |
| rs1156541  | C | 0.22 | 0.014  | 0.003 | -0.005 | 0.006 |
| rs6124476  | T | 0.59 | 0.012  | 0.002 | -0.006 | 0.005 |
| rs11689199 | A | 0.60 | 0.018  | 0.002 | -0.008 | 0.005 |
| rs1451533  | G | 0.72 | -0.016 | 0.002 | 0.006  | 0.005 |
| rs2971640  | G | 0.51 | -0.013 | 0.002 | 0.001  | 0.005 |
| rs374722   | G | 0.15 | 0.024  | 0.003 | 0.003  | 0.007 |
| rs1913808  | G | 0.71 | 0.015  | 0.002 | 0.000  | 0.005 |
| rs263771   | C | 0.77 | -0.017 | 0.003 | -0.009 | 0.006 |
| rs4675246  | G | 0.80 | -0.015 | 0.003 | -0.009 | 0.006 |
| rs13029509 | G | 0.52 | -0.018 | 0.002 | 0.017  | 0.005 |
| rs10932837 | C | 0.49 | -0.013 | 0.002 | -0.003 | 0.005 |
| rs12105701 | C | 0.40 | -0.013 | 0.002 | 0.008  | 0.005 |
| rs7564130  | T | 0.64 | -0.015 | 0.002 | 0.000  | 0.005 |
| rs11125515 | C | 0.73 | -0.014 | 0.002 | -0.006 | 0.005 |
| rs10189857 | A | 0.57 | -0.020 | 0.002 | 0.003  | 0.005 |
| rs12632778 | T | 0.95 | -0.028 | 0.005 | 0.012  | 0.012 |
| rs12491503 | G | 0.67 | -0.014 | 0.002 | 0.006  | 0.005 |
| rs9834970  | T | 0.50 | 0.013  | 0.002 | -0.004 | 0.005 |
| rs3796386  | G | 0.57 | -0.026 | 0.002 | 0.015  | 0.005 |
| rs6797840  | A | 0.46 | -0.016 | 0.002 | 0.003  | 0.005 |
| rs13107325 | C | 0.93 | -0.029 | 0.004 | 0.071  | 0.008 |
| rs7693703  | G | 0.91 | 0.023  | 0.004 | -0.002 | 0.008 |
| rs4334769  | G | 0.47 | 0.012  | 0.002 | 0.001  | 0.005 |
| rs6825241  | C | 0.54 | -0.017 | 0.002 | 0.001  | 0.005 |
| rs7700107  | A | 0.86 | -0.021 | 0.003 | 0.018  | 0.007 |
| rs77215114 | A | 0.93 | 0.024  | 0.004 | 0.002  | 0.009 |
| rs10041724 | T | 0.81 | 0.018  | 0.003 | -0.020 | 0.006 |
| rs255292   | C | 0.40 | -0.012 | 0.002 | 0.000  | 0.005 |
| rs10940659 | A | 0.53 | -0.013 | 0.002 | 0.009  | 0.005 |
| rs1031423  | T | 0.22 | -0.019 | 0.003 | 0.002  | 0.006 |
| rs17789218 | T | 0.76 | 0.019  | 0.003 | -0.004 | 0.004 |
| rs6905544  | A | 0.40 | -0.019 | 0.002 | 0.007  | 0.005 |
| rs7788008  | G | 0.57 | 0.013  | 0.002 | -0.012 | 0.005 |
| rs11763734 | A | 0.51 | -0.012 | 0.002 | 0.002  | 0.005 |
| rs10234444 | G | 0.82 | 0.016  | 0.003 | 0.005  | 0.007 |
| rs973734   | C | 0.15 | 0.017  | 0.003 | 0.000  | 0.007 |
| rs3137     | G | 0.85 | 0.017  | 0.003 | -0.011 | 0.007 |

|              |   |      |        |       |        |       |
|--------------|---|------|--------|-------|--------|-------|
| rs1421334    | A | 0.45 | 0.017  | 0.002 | -0.013 | 0.005 |
| rs6996198    | C | 0.84 | -0.016 | 0.003 | 0.004  | 0.007 |
| rs6472942    | T | 0.57 | -0.013 | 0.002 | 0.000  | 0.005 |
| rs2787374    | T | 0.41 | 0.012  | 0.002 | -0.003 | 0.005 |
| rs4382592    | T | 0.30 | 0.014  | 0.002 | 0.004  | 0.005 |
| rs2073869    | C | 0.83 | 0.019  | 0.003 | 0.000  | 0.006 |
| rs2291681    | G | 0.58 | 0.013  | 0.002 | -0.002 | 0.005 |
| rs2616830    | G | 0.46 | 0.016  | 0.002 | 0.002  | 0.005 |
| rs2791574    | T | 0.66 | -0.013 | 0.002 | 0.009  | 0.005 |
| rs7609       | A | 0.23 | 0.015  | 0.003 | -0.007 | 0.006 |
| rs10737620   | T | 0.27 | 0.014  | 0.002 | 0.004  | 0.005 |
| rs17379561   | A | 0.86 | -0.025 | 0.003 | 0.009  | 0.007 |
| rs6031440    | A | 0.40 | 0.012  | 0.002 | -0.005 | 0.005 |
| rs631130     | T | 0.37 | -0.014 | 0.002 | -0.008 | 0.006 |
| rs10739499   | C | 0.34 | 0.014  | 0.002 | -0.001 | 0.005 |
| rs10145592   | C | 0.41 | -0.015 | 0.002 | 0.004  | 0.005 |
| rs4937842    | G | 0.63 | -0.013 | 0.002 | 0.001  | 0.005 |
| <b>LDL-C</b> |   |      |        |       |        |       |
| rs7089973    | C | 0.62 | -0.013 | 0.002 | -0.001 | 0.006 |
| rs11245482   | T | 0.61 | -0.013 | 0.002 | 0.003  | 0.006 |
| rs17727474   | C | 0.83 | 0.018  | 0.003 | 0.017  | 0.007 |
| rs1243182    | C | 0.69 | -0.019 | 0.002 | 0.005  | 0.006 |
| rs2045147    | A | 0.45 | 0.013  | 0.002 | 0.005  | 0.005 |
| rs11201422   | T | 0.67 | 0.013  | 0.002 | 0.020  | 0.006 |
| rs11218575   | C | 0.57 | 0.015  | 0.002 | 0.000  | 0.005 |
| rs12289262   | C | 0.73 | -0.014 | 0.002 | -0.004 | 0.006 |
| rs4845364    | A | 0.50 | -0.015 | 0.002 | -0.006 | 0.005 |
| rs801733     | A | 0.64 | 0.017  | 0.002 | 0.002  | 0.004 |
| rs6673341    | T | 0.47 | -0.015 | 0.002 | -0.001 | 0.005 |
| rs17207890   | G | 0.66 | 0.016  | 0.002 | 0.013  | 0.006 |
| rs10876864   | G | 0.43 | -0.013 | 0.002 | -0.001 | 0.005 |
| rs8756       | C | 0.48 | -0.013 | 0.002 | 0.001  | 0.004 |
| rs9563168    | G | 0.79 | 0.018  | 0.003 | 0.007  | 0.006 |
| rs9528023    | C | 0.72 | 0.013  | 0.002 | 0.000  | 0.006 |
| rs1022785    | G | 0.14 | 0.018  | 0.003 | 0.002  | 0.007 |
| rs8043253    | C | 0.57 | -0.012 | 0.002 | 0.005  | 0.005 |
| rs2460       | G | 0.74 | -0.015 | 0.002 | 0.003  | 0.006 |
| rs7189927    | T | 0.36 | 0.015  | 0.002 | -0.007 | 0.004 |
| rs749671     | G | 0.63 | 0.016  | 0.002 | 0.015  | 0.004 |
| rs2447098    | C | 0.48 | -0.015 | 0.002 | -0.016 | 0.006 |
| rs11654952   | T | 0.86 | -0.017 | 0.003 | 0.008  | 0.008 |
| rs2584597    | T | 0.66 | 0.015  | 0.002 | 0.000  | 0.005 |
| rs9902312    | T | 0.68 | 0.015  | 0.002 | -0.004 | 0.005 |
| rs303753     | G | 0.65 | -0.014 | 0.002 | -0.008 | 0.006 |
| rs11081851   | G | 0.44 | -0.013 | 0.002 | 0.007  | 0.006 |
| rs9964724    | C | 0.32 | 0.018  | 0.002 | 0.002  | 0.006 |
| rs1156541    | C | 0.22 | 0.014  | 0.003 | 0.012  | 0.006 |

|            |   |      |        |       |        |       |
|------------|---|------|--------|-------|--------|-------|
| rs6124476  | T | 0.59 | 0.012  | 0.002 | -0.001 | 0.005 |
| rs11689199 | A | 0.60 | 0.018  | 0.002 | -0.003 | 0.005 |
| rs1451533  | G | 0.72 | -0.016 | 0.002 | -0.004 | 0.006 |
| rs2971640  | G | 0.51 | -0.013 | 0.002 | 0.007  | 0.005 |
| rs374722   | G | 0.15 | 0.024  | 0.003 | -0.002 | 0.007 |
| rs1913808  | G | 0.71 | 0.015  | 0.002 | -0.012 | 0.006 |
| rs263771   | C | 0.77 | -0.017 | 0.003 | -0.002 | 0.007 |
| rs4675246  | G | 0.80 | -0.015 | 0.003 | -0.001 | 0.007 |
| rs13029509 | G | 0.52 | -0.018 | 0.002 | -0.004 | 0.005 |
| rs10932837 | C | 0.49 | -0.013 | 0.002 | 0.002  | 0.005 |
| rs12105701 | C | 0.40 | -0.013 | 0.002 | -0.009 | 0.006 |
| rs7564130  | T | 0.64 | -0.015 | 0.002 | 0.009  | 0.005 |
| rs11125515 | C | 0.73 | -0.014 | 0.002 | -0.005 | 0.006 |
| rs10189857 | A | 0.57 | -0.020 | 0.002 | -0.002 | 0.005 |
| rs12632778 | T | 0.95 | -0.028 | 0.005 | 0.016  | 0.013 |
| rs12491503 | G | 0.67 | -0.014 | 0.002 | 0.001  | 0.005 |
| rs9834970  | T | 0.50 | 0.013  | 0.002 | -0.004 | 0.005 |
| rs3796386  | G | 0.57 | -0.026 | 0.002 | 0.004  | 0.005 |
| rs6797840  | A | 0.46 | -0.016 | 0.002 | 0.013  | 0.005 |
| rs13107325 | C | 0.93 | -0.029 | 0.004 | 0.016  | 0.008 |
| rs7693703  | G | 0.91 | 0.023  | 0.004 | -0.001 | 0.009 |
| rs4334769  | G | 0.47 | 0.012  | 0.002 | 0.010  | 0.005 |
| rs6825241  | C | 0.54 | -0.017 | 0.002 | 0.005  | 0.005 |
| rs7700107  | A | 0.86 | -0.021 | 0.003 | -0.006 | 0.008 |
| rs77215114 | A | 0.93 | 0.024  | 0.004 | 0.015  | 0.009 |
| rs10041724 | T | 0.81 | 0.018  | 0.003 | 0.002  | 0.007 |
| rs255292   | C | 0.40 | -0.012 | 0.002 | 0.004  | 0.005 |
| rs10940659 | A | 0.53 | -0.013 | 0.002 | -0.013 | 0.005 |
| rs1031423  | T | 0.22 | -0.019 | 0.003 | -0.005 | 0.007 |
| rs17789218 | T | 0.76 | 0.019  | 0.003 | 0.024  | 0.004 |
| rs6905544  | A | 0.40 | -0.019 | 0.002 | -0.012 | 0.005 |
| rs7788008  | G | 0.57 | 0.013  | 0.002 | 0.005  | 0.005 |
| rs11763734 | A | 0.51 | -0.012 | 0.002 | 0.002  | 0.005 |
| rs10234444 | G | 0.82 | 0.016  | 0.003 | 0.001  | 0.007 |
| rs973734   | C | 0.15 | 0.017  | 0.003 | 0.013  | 0.007 |
| rs3137     | G | 0.85 | 0.017  | 0.003 | -0.001 | 0.007 |
| rs1421334  | A | 0.45 | 0.017  | 0.002 | 0.005  | 0.005 |
| rs6996198  | C | 0.84 | -0.016 | 0.003 | -0.007 | 0.007 |
| rs6472942  | T | 0.57 | -0.013 | 0.002 | 0.001  | 0.005 |
| rs2787374  | T | 0.41 | 0.012  | 0.002 | 0.003  | 0.005 |
| rs4382592  | T | 0.30 | 0.014  | 0.002 | 0.004  | 0.006 |
| rs2073869  | C | 0.83 | 0.019  | 0.003 | -0.001 | 0.007 |
| rs2291681  | G | 0.58 | 0.013  | 0.002 | -0.001 | 0.005 |
| rs2616830  | G | 0.46 | 0.016  | 0.002 | -0.007 | 0.005 |
| rs2791574  | T | 0.66 | -0.013 | 0.002 | -0.006 | 0.006 |
| rs7609     | A | 0.23 | 0.015  | 0.003 | -0.004 | 0.006 |
| rs10737620 | T | 0.27 | 0.014  | 0.002 | -0.013 | 0.006 |

|            |   |      |        |       |        |       |
|------------|---|------|--------|-------|--------|-------|
| rs17379561 | A | 0.86 | -0.025 | 0.003 | -0.007 | 0.008 |
| rs6031440  | A | 0.40 | 0.012  | 0.002 | 0.010  | 0.005 |
| rs631130   | T | 0.37 | -0.014 | 0.002 | 0.013  | 0.007 |
| rs10739499 | C | 0.34 | 0.014  | 0.002 | -0.014 | 0.005 |
| rs10145592 | C | 0.41 | -0.015 | 0.002 | 0.006  | 0.005 |
| rs4937842  | G | 0.63 | -0.013 | 0.002 | 0.003  | 0.005 |
| <b>TC</b>  |   |      |        |       |        |       |
| rs7089973  | C | 0.62 | -0.013 | 0.002 | -0.005 | 0.006 |
| rs11245482 | T | 0.61 | -0.013 | 0.002 | 0.007  | 0.005 |
| rs17727474 | C | 0.83 | 0.018  | 0.003 | 0.023  | 0.007 |
| rs1243182  | C | 0.69 | -0.019 | 0.002 | 0.001  | 0.005 |
| rs2045147  | A | 0.45 | 0.013  | 0.002 | 0.004  | 0.005 |
| rs11201422 | T | 0.67 | 0.013  | 0.002 | 0.013  | 0.006 |
| rs11218575 | C | 0.57 | 0.015  | 0.002 | -0.002 | 0.005 |
| rs12289262 | C | 0.73 | -0.014 | 0.002 | -0.001 | 0.006 |
| rs4845364  | A | 0.50 | -0.015 | 0.002 | -0.001 | 0.005 |
| rs801733   | A | 0.64 | 0.017  | 0.002 | -0.002 | 0.004 |
| rs6673341  | T | 0.47 | -0.015 | 0.002 | -0.003 | 0.005 |
| rs17207890 | G | 0.66 | 0.016  | 0.002 | 0.016  | 0.006 |
| rs10876864 | G | 0.43 | -0.013 | 0.002 | 0.002  | 0.005 |
| rs8756     | C | 0.48 | -0.013 | 0.002 | -0.005 | 0.004 |
| rs9563168  | G | 0.79 | 0.018  | 0.003 | 0.005  | 0.006 |
| rs9528023  | C | 0.72 | 0.013  | 0.002 | -0.001 | 0.006 |
| rs1022785  | G | 0.14 | 0.018  | 0.003 | 0.003  | 0.007 |
| rs8043253  | C | 0.57 | -0.012 | 0.002 | 0.005  | 0.005 |
| rs2460     | G | 0.74 | -0.015 | 0.002 | 0.001  | 0.006 |
| rs7189927  | T | 0.36 | 0.015  | 0.002 | -0.013 | 0.004 |
| rs749671   | G | 0.63 | 0.016  | 0.002 | 0.017  | 0.004 |
| rs2447098  | C | 0.48 | -0.015 | 0.002 | -0.019 | 0.006 |
| rs11654952 | T | 0.86 | -0.017 | 0.003 | 0.000  | 0.008 |
| rs2584597  | T | 0.66 | 0.015  | 0.002 | -0.007 | 0.005 |
| rs9902312  | T | 0.68 | 0.015  | 0.002 | -0.002 | 0.005 |
| rs303753   | G | 0.65 | -0.014 | 0.002 | -0.009 | 0.005 |
| rs11081851 | G | 0.44 | -0.013 | 0.002 | 0.006  | 0.005 |
| rs9964724  | C | 0.32 | 0.018  | 0.002 | 0.001  | 0.006 |
| rs1156541  | C | 0.22 | 0.014  | 0.003 | 0.005  | 0.006 |
| rs6124476  | T | 0.59 | 0.012  | 0.002 | -0.002 | 0.005 |
| rs11689199 | A | 0.60 | 0.018  | 0.002 | -0.007 | 0.005 |
| rs1451533  | G | 0.72 | -0.016 | 0.002 | -0.002 | 0.006 |
| rs2971640  | G | 0.51 | -0.013 | 0.002 | 0.006  | 0.005 |
| rs374722   | G | 0.15 | 0.024  | 0.003 | 0.004  | 0.007 |
| rs1913808  | G | 0.71 | 0.015  | 0.002 | -0.010 | 0.006 |
| rs263771   | C | 0.77 | -0.017 | 0.003 | -0.001 | 0.007 |
| rs4675246  | G | 0.80 | -0.015 | 0.003 | -0.002 | 0.007 |
| rs13029509 | G | 0.52 | -0.018 | 0.002 | -0.002 | 0.005 |
| rs10932837 | C | 0.49 | -0.013 | 0.002 | 0.000  | 0.005 |
| rs12105701 | C | 0.40 | -0.013 | 0.002 | -0.007 | 0.005 |



|            |   |      |        |       |        |       |
|------------|---|------|--------|-------|--------|-------|
| rs7564130  | T | 0.64 | -0.015 | 0.002 | 0.011  | 0.005 |
| rs11125515 | C | 0.73 | -0.014 | 0.002 | -0.003 | 0.006 |
| rs10189857 | A | 0.57 | -0.020 | 0.002 | -0.004 | 0.005 |
| rs12632778 | T | 0.95 | -0.028 | 0.005 | 0.010  | 0.012 |
| rs12491503 | G | 0.67 | -0.014 | 0.002 | -0.002 | 0.005 |
| rs9834970  | T | 0.50 | 0.013  | 0.002 | -0.006 | 0.005 |
| rs3796386  | G | 0.57 | -0.026 | 0.002 | 0.011  | 0.005 |
| rs6797840  | A | 0.46 | -0.016 | 0.002 | 0.007  | 0.005 |
| rs13107325 | C | 0.93 | -0.029 | 0.004 | 0.033  | 0.008 |
| rs7693703  | G | 0.91 | 0.023  | 0.004 | 0.000  | 0.009 |
| rs4334769  | G | 0.47 | 0.012  | 0.002 | 0.008  | 0.005 |
| rs6825241  | C | 0.54 | -0.017 | 0.002 | 0.004  | 0.005 |
| rs7700107  | A | 0.86 | -0.021 | 0.003 | -0.001 | 0.008 |
| rs77215114 | A | 0.93 | 0.024  | 0.004 | 0.011  | 0.009 |
| rs10041724 | T | 0.81 | 0.018  | 0.003 | -0.003 | 0.006 |
| rs255292   | C | 0.40 | -0.012 | 0.002 | 0.005  | 0.005 |
| rs10940659 | A | 0.53 | -0.013 | 0.002 | -0.009 | 0.005 |
| rs1031423  | T | 0.22 | -0.019 | 0.003 | -0.003 | 0.007 |
| rs17789218 | T | 0.76 | 0.019  | 0.003 | 0.020  | 0.004 |
| rs6905544  | A | 0.40 | -0.019 | 0.002 | -0.010 | 0.005 |
| rs7788008  | G | 0.57 | 0.013  | 0.002 | 0.002  | 0.005 |
| rs11763734 | A | 0.51 | -0.012 | 0.002 | 0.004  | 0.005 |
| rs10234444 | G | 0.82 | 0.016  | 0.003 | 0.003  | 0.007 |
| rs973734   | C | 0.15 | 0.017  | 0.003 | 0.014  | 0.007 |
| rs3137     | G | 0.85 | 0.017  | 0.003 | 0.003  | 0.007 |
| rs1421334  | A | 0.45 | 0.017  | 0.002 | 0.001  | 0.005 |
| rs6996198  | C | 0.84 | -0.016 | 0.003 | -0.005 | 0.007 |
| rs6472942  | T | 0.57 | -0.013 | 0.002 | 0.000  | 0.005 |
| rs2787374  | T | 0.41 | 0.012  | 0.002 | -0.006 | 0.005 |
| rs4382592  | T | 0.30 | 0.014  | 0.002 | 0.006  | 0.006 |
| rs2073869  | C | 0.83 | 0.019  | 0.003 | -0.002 | 0.007 |
| rs2291681  | G | 0.58 | 0.013  | 0.002 | -0.006 | 0.005 |
| rs2616830  | G | 0.46 | 0.016  | 0.002 | -0.007 | 0.005 |
| rs2791574  | T | 0.66 | -0.013 | 0.002 | -0.005 | 0.005 |
| rs7609     | A | 0.23 | 0.015  | 0.003 | -0.005 | 0.006 |
| rs10737620 | T | 0.27 | 0.014  | 0.002 | -0.010 | 0.006 |
| rs17379561 | A | 0.86 | -0.025 | 0.003 | -0.004 | 0.007 |
| rs6031440  | A | 0.40 | 0.012  | 0.002 | 0.009  | 0.005 |
| rs631130   | T | 0.37 | -0.014 | 0.002 | 0.008  | 0.007 |
| rs10739499 | C | 0.34 | 0.014  | 0.002 | -0.016 | 0.005 |
| rs10145592 | C | 0.41 | -0.015 | 0.002 | 0.010  | 0.005 |
| rs4937842  | G | 0.63 | -0.013 | 0.002 | -0.001 | 0.005 |
| <b>TG</b>  |   |      |        |       |        |       |
| rs7089973  | C | 0.62 | -0.013 | 0.002 | -0.002 | 0.005 |
| rs11245482 | T | 0.61 | -0.013 | 0.002 | -0.002 | 0.005 |
| rs17727474 | C | 0.83 | 0.018  | 0.003 | 0.009  | 0.006 |
| rs1243182  | C | 0.69 | -0.019 | 0.002 | -0.007 | 0.005 |

|            |   |      |        |       |        |       |
|------------|---|------|--------|-------|--------|-------|
| rs2045147  | A | 0.45 | 0.013  | 0.002 | 0.007  | 0.005 |
| rs11201422 | T | 0.67 | 0.013  | 0.002 | 0.004  | 0.005 |
| rs11218575 | C | 0.57 | 0.015  | 0.002 | 0.008  | 0.005 |
| rs12289262 | C | 0.73 | -0.014 | 0.002 | 0.006  | 0.005 |
| rs4845364  | A | 0.50 | -0.015 | 0.002 | -0.005 | 0.005 |
| rs801733   | A | 0.64 | 0.017  | 0.002 | 0.007  | 0.004 |
| rs6673341  | T | 0.47 | -0.015 | 0.002 | 0.000  | 0.005 |
| rs17207890 | G | 0.66 | 0.016  | 0.002 | 0.010  | 0.005 |
| rs10876864 | G | 0.43 | -0.013 | 0.002 | -0.006 | 0.005 |
| rs8756     | C | 0.48 | -0.013 | 0.002 | -0.003 | 0.003 |
| rs9563168  | G | 0.79 | 0.018  | 0.003 | 0.014  | 0.006 |
| rs9528023  | C | 0.72 | 0.013  | 0.002 | -0.009 | 0.006 |
| rs1022785  | G | 0.14 | 0.018  | 0.003 | 0.010  | 0.007 |
| rs8043253  | C | 0.57 | -0.012 | 0.002 | -0.003 | 0.005 |
| rs2460     | G | 0.74 | -0.015 | 0.002 | -0.012 | 0.006 |
| rs7189927  | T | 0.36 | 0.015  | 0.002 | -0.004 | 0.004 |
| rs749671   | G | 0.63 | 0.016  | 0.002 | 0.021  | 0.003 |
| rs2447098  | C | 0.48 | -0.015 | 0.002 | 0.004  | 0.005 |
| rs11654952 | T | 0.86 | -0.017 | 0.003 | 0.007  | 0.007 |
| rs2584597  | T | 0.66 | 0.015  | 0.002 | 0.005  | 0.005 |
| rs9902312  | T | 0.68 | 0.015  | 0.002 | 0.002  | 0.005 |
| rs303753   | G | 0.65 | -0.014 | 0.002 | -0.007 | 0.005 |
| rs11081851 | G | 0.44 | -0.013 | 0.002 | 0.000  | 0.005 |
| rs9964724  | C | 0.32 | 0.018  | 0.002 | 0.007  | 0.005 |
| rs1156541  | C | 0.22 | 0.014  | 0.003 | 0.005  | 0.006 |
| rs6124476  | T | 0.59 | 0.012  | 0.002 | 0.008  | 0.005 |
| rs11689199 | A | 0.60 | 0.018  | 0.002 | -0.003 | 0.005 |
| rs1451533  | G | 0.72 | -0.016 | 0.002 | -0.004 | 0.005 |
| rs2971640  | G | 0.51 | -0.013 | 0.002 | 0.002  | 0.005 |
| rs374722   | G | 0.15 | 0.024  | 0.003 | -0.002 | 0.006 |
| rs1913808  | G | 0.71 | 0.015  | 0.002 | 0.003  | 0.005 |
| rs263771   | C | 0.77 | -0.017 | 0.003 | 0.006  | 0.006 |
| rs4675246  | G | 0.80 | -0.015 | 0.003 | 0.006  | 0.006 |
| rs13029509 | G | 0.52 | -0.018 | 0.002 | -0.014 | 0.005 |
| rs10932837 | C | 0.49 | -0.013 | 0.002 | 0.006  | 0.005 |
| rs12105701 | C | 0.40 | -0.013 | 0.002 | -0.003 | 0.005 |
| rs7564130  | T | 0.64 | -0.015 | 0.002 | 0.002  | 0.005 |
| rs11125515 | C | 0.73 | -0.014 | 0.002 | 0.006  | 0.005 |
| rs10189857 | A | 0.57 | -0.020 | 0.002 | -0.004 | 0.005 |
| rs12632778 | T | 0.95 | -0.028 | 0.005 | -0.003 | 0.011 |
| rs12491503 | G | 0.67 | -0.014 | 0.002 | -0.005 | 0.005 |
| rs9834970  | T | 0.50 | 0.013  | 0.002 | 0.001  | 0.005 |
| rs3796386  | G | 0.57 | -0.026 | 0.002 | -0.002 | 0.005 |
| rs6797840  | A | 0.46 | -0.016 | 0.002 | 0.001  | 0.005 |
| rs13107325 | C | 0.93 | -0.029 | 0.004 | -0.031 | 0.008 |
| rs7693703  | G | 0.91 | 0.023  | 0.004 | -0.001 | 0.008 |
| rs4334769  | G | 0.47 | 0.012  | 0.002 | -0.003 | 0.005 |

|              |   |      |        |       |        |       |
|--------------|---|------|--------|-------|--------|-------|
| rs6825241    | C | 0.54 | -0.017 | 0.002 | -0.005 | 0.005 |
| rs7700107    | A | 0.86 | -0.021 | 0.003 | -0.018 | 0.007 |
| rs77215114   | A | 0.93 | 0.024  | 0.004 | 0.009  | 0.009 |
| rs10041724   | T | 0.81 | 0.018  | 0.003 | 0.005  | 0.006 |
| rs255292     | C | 0.40 | -0.012 | 0.002 | 0.005  | 0.005 |
| rs10940659   | A | 0.53 | -0.013 | 0.002 | -0.008 | 0.005 |
| rs1031423    | T | 0.22 | -0.019 | 0.003 | 0.003  | 0.006 |
| rs17789218   | T | 0.76 | 0.019  | 0.003 | 0.006  | 0.004 |
| rs6905544    | A | 0.40 | -0.019 | 0.002 | -0.006 | 0.005 |
| rs7788008    | G | 0.57 | 0.013  | 0.002 | 0.007  | 0.005 |
| rs11763734   | A | 0.51 | -0.012 | 0.002 | 0.003  | 0.005 |
| rs10234444   | G | 0.82 | 0.016  | 0.003 | -0.003 | 0.007 |
| rs973734     | C | 0.15 | 0.017  | 0.003 | 0.000  | 0.006 |
| rs3137       | G | 0.85 | 0.017  | 0.003 | 0.013  | 0.006 |
| rs1421334    | A | 0.45 | 0.017  | 0.002 | -0.004 | 0.005 |
| rs6996198    | C | 0.84 | -0.016 | 0.003 | -0.009 | 0.006 |
| rs6472942    | T | 0.57 | -0.013 | 0.002 | -0.004 | 0.005 |
| rs2787374    | T | 0.41 | 0.012  | 0.002 | -0.011 | 0.005 |
| rs4382592    | T | 0.30 | 0.014  | 0.002 | 0.008  | 0.005 |
| rs2073869    | C | 0.83 | 0.019  | 0.003 | -0.003 | 0.006 |
| rs2291681    | G | 0.58 | 0.013  | 0.002 | -0.001 | 0.005 |
| rs2616830    | G | 0.46 | 0.016  | 0.002 | -0.002 | 0.005 |
| rs2791574    | T | 0.66 | -0.013 | 0.002 | -0.006 | 0.005 |
| rs7609       | A | 0.23 | 0.015  | 0.003 | 0.002  | 0.006 |
| rs10737620   | T | 0.27 | 0.014  | 0.002 | -0.001 | 0.005 |
| rs17379561   | A | 0.86 | -0.025 | 0.003 | -0.009 | 0.007 |
| rs6031440    | A | 0.40 | 0.012  | 0.002 | 0.011  | 0.005 |
| rs631130     | T | 0.37 | -0.014 | 0.002 | 0.010  | 0.006 |
| rs10739499   | C | 0.34 | 0.014  | 0.002 | 0.000  | 0.005 |
| rs10145592   | C | 0.41 | -0.015 | 0.002 | 0.001  | 0.005 |
| rs4937842    | G | 0.63 | -0.013 | 0.002 | -0.001 | 0.005 |
| <b>HbA1c</b> |   |      |        |       |        |       |
| rs631130     | T | 0.37 | -0.014 | 0.002 | 0.002  | 0.003 |
| rs17379561   | A | 0.86 | -0.025 | 0.003 | 0.003  | 0.003 |
| rs4845364    | A | 0.50 | -0.015 | 0.002 | 0.000  | 0.002 |
| rs6673341    | T | 0.47 | -0.015 | 0.002 | -0.002 | 0.002 |
| rs10737620   | T | 0.27 | 0.014  | 0.002 | -0.001 | 0.002 |
| rs12105701   | C | 0.40 | -0.013 | 0.002 | -0.001 | 0.002 |
| rs7564130    | T | 0.64 | -0.015 | 0.002 | -0.002 | 0.002 |
| rs11125515   | C | 0.73 | -0.014 | 0.002 | 0.000  | 0.002 |
| rs10189857   | A | 0.57 | -0.020 | 0.002 | -0.002 | 0.002 |
| rs11689199   | A | 0.60 | 0.018  | 0.002 | -0.001 | 0.002 |
| rs1451533    | G | 0.72 | -0.016 | 0.002 | -0.001 | 0.002 |
| rs2971640    | G | 0.51 | -0.013 | 0.002 | 0.000  | 0.002 |
| rs374722     | G | 0.15 | 0.024  | 0.003 | -0.002 | 0.003 |
| rs1913808    | G | 0.71 | 0.015  | 0.002 | -0.002 | 0.002 |
| rs263771     | C | 0.77 | -0.017 | 0.003 | 0.002  | 0.002 |

|            |   |      |        |       |        |       |
|------------|---|------|--------|-------|--------|-------|
| rs4675246  | G | 0.80 | -0.015 | 0.003 | 0.005  | 0.003 |
| rs13029509 | G | 0.52 | -0.018 | 0.002 | -0.001 | 0.002 |
| rs10932837 | C | 0.49 | -0.013 | 0.002 | 0.002  | 0.002 |
| rs9834970  | T | 0.50 | 0.013  | 0.002 | -0.002 | 0.002 |
| rs3796386  | G | 0.57 | -0.026 | 0.002 | 0.002  | 0.002 |
| rs11130793 | C | 0.60 | 0.013  | 0.002 | -0.001 | 0.005 |
| rs12632778 | T | 0.95 | -0.028 | 0.005 | 0.001  | 0.004 |
| rs12491503 | G | 0.67 | -0.014 | 0.002 | 0.001  | 0.002 |
| rs7700107  | A | 0.86 | -0.021 | 0.003 | -0.004 | 0.003 |
| rs13107325 | C | 0.93 | -0.029 | 0.004 | 0.000  | 0.003 |
| rs7693703  | G | 0.91 | 0.023  | 0.004 | 0.004  | 0.003 |
| rs4334769  | G | 0.47 | 0.012  | 0.002 | 0.001  | 0.002 |
| rs6825241  | C | 0.54 | -0.017 | 0.002 | -0.003 | 0.002 |
| rs10940659 | A | 0.53 | -0.013 | 0.002 | 0.000  | 0.002 |
| rs1031423  | T | 0.22 | -0.019 | 0.003 | -0.003 | 0.002 |
| rs10041724 | T | 0.81 | 0.018  | 0.003 | 0.000  | 0.002 |
| rs255292   | C | 0.40 | -0.012 | 0.002 | 0.003  | 0.002 |
| rs6905544  | A | 0.40 | -0.019 | 0.002 | 0.000  | 0.002 |
| rs17789218 | T | 0.76 | 0.019  | 0.003 | 0.000  | 0.002 |
| rs10234444 | G | 0.82 | 0.016  | 0.003 | -0.004 | 0.003 |
| rs6973656  | A | 0.60 | -0.013 | 0.002 | 0.000  | 0.002 |
| rs973734   | C | 0.15 | 0.017  | 0.003 | 0.000  | 0.003 |
| rs3137     | G | 0.85 | 0.017  | 0.003 | -0.005 | 0.003 |
| rs7788008  | G | 0.57 | 0.013  | 0.002 | 0.003  | 0.002 |
| rs11763734 | A | 0.51 | -0.012 | 0.002 | 0.002  | 0.002 |
| rs1421334  | A | 0.45 | 0.017  | 0.002 | -0.001 | 0.002 |
| rs6996198  | C | 0.84 | -0.016 | 0.003 | 0.002  | 0.002 |
| rs6472942  | T | 0.57 | -0.013 | 0.002 | 0.000  | 0.002 |
| rs2616830  | G | 0.46 | 0.016  | 0.002 | 0.002  | 0.002 |
| rs2291681  | G | 0.58 | 0.013  | 0.002 | -0.001 | 0.002 |
| rs2791574  | T | 0.66 | -0.013 | 0.002 | -0.001 | 0.002 |
| rs2787374  | T | 0.41 | 0.012  | 0.002 | 0.001  | 0.002 |
| rs10739499 | C | 0.34 | 0.014  | 0.002 | 0.001  | 0.002 |
| rs4382592  | T | 0.30 | 0.014  | 0.002 | 0.003  | 0.002 |
| rs2073869  | C | 0.83 | 0.019  | 0.003 | 0.002  | 0.002 |
| rs1243182  | C | 0.69 | -0.019 | 0.002 | 0.002  | 0.002 |
| rs2045147  | A | 0.45 | 0.013  | 0.002 | 0.003  | 0.002 |
| rs11201422 | T | 0.67 | 0.013  | 0.002 | 0.003  | 0.002 |
| rs7089973  | C | 0.62 | -0.013 | 0.002 | -0.001 | 0.002 |
| rs11245482 | T | 0.61 | -0.013 | 0.002 | 0.000  | 0.002 |
| rs17727474 | C | 0.83 | 0.018  | 0.003 | -0.004 | 0.002 |
| rs12289262 | C | 0.73 | -0.014 | 0.002 | -0.001 | 0.002 |
| rs801733   | A | 0.64 | 0.017  | 0.002 | -0.001 | 0.002 |
| rs17207890 | G | 0.66 | 0.016  | 0.002 | 0.002  | 0.002 |
| rs11218575 | C | 0.57 | 0.015  | 0.002 | 0.000  | 0.002 |
| rs4937842  | G | 0.63 | -0.013 | 0.002 | 0.001  | 0.002 |
| rs10876864 | G | 0.43 | -0.013 | 0.002 | -0.003 | 0.002 |

|            |   |      |        |       |        |       |
|------------|---|------|--------|-------|--------|-------|
| rs8756     | C | 0.48 | -0.013 | 0.002 | -0.001 | 0.002 |
| rs9563168  | G | 0.79 | 0.018  | 0.003 | 0.005  | 0.002 |
| rs9528023  | C | 0.72 | 0.013  | 0.002 | 0.000  | 0.002 |
| rs1022785  | G | 0.14 | 0.018  | 0.003 | 0.003  | 0.003 |
| rs10145592 | C | 0.41 | -0.015 | 0.002 | -0.001 | 0.002 |
| rs8043253  | C | 0.57 | -0.012 | 0.002 | 0.000  | 0.002 |
| rs2460     | G | 0.74 | -0.015 | 0.002 | 0.000  | 0.002 |
| rs7189927  | T | 0.36 | 0.015  | 0.002 | 0.004  | 0.002 |
| rs749671   | G | 0.63 | 0.016  | 0.002 | 0.002  | 0.002 |
| rs2447098  | C | 0.48 | -0.015 | 0.002 | -0.003 | 0.002 |
| rs11654952 | T | 0.86 | -0.017 | 0.003 | 0.001  | 0.003 |
| rs2584597  | T | 0.66 | 0.015  | 0.002 | 0.004  | 0.002 |
| rs9902312  | T | 0.68 | 0.015  | 0.002 | 0.003  | 0.002 |
| rs303753   | G | 0.65 | -0.014 | 0.002 | -0.002 | 0.002 |
| rs11081851 | G | 0.44 | -0.013 | 0.002 | -0.001 | 0.002 |
| rs9964724  | C | 0.32 | 0.018  | 0.002 | 0.004  | 0.002 |
| rs1156541  | C | 0.22 | 0.014  | 0.003 | 0.002  | 0.002 |
| rs6124476  | T | 0.59 | 0.012  | 0.002 | 0.000  | 0.002 |
| rs6031440  | A | 0.40 | 0.012  | 0.002 | -0.001 | 0.002 |
| rs7609     | A | 0.23 | 0.015  | 0.003 | 0.000  | 0.002 |

**ISI**

|            |   |      |        |       |        |       |
|------------|---|------|--------|-------|--------|-------|
| rs631130   | T | 0.37 | -0.014 | 0.002 | -0.081 | 0.091 |
| rs17379561 | A | 0.86 | -0.025 | 0.003 | 0.010  | 0.097 |
| rs4845364  | A | 0.50 | -0.015 | 0.002 | 0.041  | 0.077 |
| rs6673341  | T | 0.47 | -0.015 | 0.002 | -0.056 | 0.078 |
| rs10737620 | T | 0.27 | 0.014  | 0.002 | 0.021  | 0.087 |
| rs12105701 | C | 0.40 | -0.013 | 0.002 | 0.019  | 0.087 |
| rs7564130  | T | 0.64 | -0.015 | 0.002 | -0.120 | 0.077 |
| rs11125515 | C | 0.73 | -0.014 | 0.002 | 0.140  | 0.081 |
| rs10189857 | A | 0.57 | -0.020 | 0.002 | 0.093  | 0.075 |
| rs11689199 | A | 0.60 | 0.018  | 0.002 | -0.007 | 0.078 |
| rs1451533  | G | 0.72 | -0.016 | 0.002 | 0.035  | 0.084 |
| rs2971640  | G | 0.51 | -0.013 | 0.002 | 0.007  | 0.075 |
| rs374722   | G | 0.15 | 0.024  | 0.003 | -0.035 | 0.099 |
| rs1913808  | G | 0.71 | 0.015  | 0.002 | -0.110 | 0.077 |
| rs263771   | C | 0.77 | -0.017 | 0.003 | -0.052 | 0.095 |
| rs4675246  | G | 0.80 | -0.015 | 0.003 | 0.044  | 0.093 |
| rs13029509 | G | 0.52 | -0.018 | 0.002 | -0.094 | 0.077 |
| rs10932837 | C | 0.49 | -0.013 | 0.002 | -0.004 | 0.076 |
| rs9834970  | T | 0.50 | 0.013  | 0.002 | -0.074 | 0.074 |
| rs3796386  | G | 0.57 | -0.026 | 0.002 | 0.065  | 0.079 |
| rs12632778 | T | 0.95 | -0.028 | 0.005 | -0.160 | 0.180 |
| rs12491503 | G | 0.67 | -0.014 | 0.002 | 0.003  | 0.079 |
| rs7700107  | A | 0.86 | -0.021 | 0.003 | -0.066 | 0.130 |
| rs13107325 | C | 0.93 | -0.029 | 0.004 | -0.250 | 0.190 |
| rs7693703  | G | 0.91 | 0.023  | 0.004 | -0.073 | 0.130 |
| rs4334769  | G | 0.47 | 0.012  | 0.002 | 0.110  | 0.079 |

|            |   |      |        |       |        |       |
|------------|---|------|--------|-------|--------|-------|
| rs6825241  | C | 0.54 | -0.017 | 0.002 | 0.032  | 0.075 |
| rs10940659 | A | 0.53 | -0.013 | 0.002 | -0.110 | 0.075 |
| rs1031423  | T | 0.22 | -0.019 | 0.003 | 0.170  | 0.110 |
| rs10041724 | T | 0.81 | 0.018  | 0.003 | 0.070  | 0.095 |
| rs255292   | C | 0.40 | -0.012 | 0.002 | 0.070  | 0.074 |
| rs6905544  | A | 0.40 | -0.019 | 0.002 | 0.040  | 0.077 |
| rs17789218 | T | 0.76 | 0.019  | 0.003 | -0.006 | 0.084 |
| rs10234444 | G | 0.82 | 0.016  | 0.003 | 0.024  | 0.120 |
| rs6973656  | A | 0.60 | -0.013 | 0.002 | 0.043  | 0.077 |
| rs973734   | C | 0.15 | 0.017  | 0.003 | -0.150 | 0.098 |
| rs3137     | G | 0.85 | 0.017  | 0.003 | -0.130 | 0.099 |
| rs7788008  | G | 0.57 | 0.013  | 0.002 | -0.014 | 0.076 |
| rs11763734 | A | 0.51 | -0.012 | 0.002 | -0.120 | 0.074 |
| rs1421334  | A | 0.45 | 0.017  | 0.002 | 0.009  | 0.073 |
| rs6996198  | C | 0.84 | -0.016 | 0.003 | 0.210  | 0.096 |
| rs6472942  | T | 0.57 | -0.013 | 0.002 | -0.057 | 0.076 |
| rs2616830  | G | 0.46 | 0.016  | 0.002 | -0.100 | 0.083 |
| rs2291681  | G | 0.58 | 0.013  | 0.002 | 0.093  | 0.086 |
| rs2791574  | T | 0.66 | -0.013 | 0.002 | 0.031  | 0.086 |
| rs2787374  | T | 0.41 | 0.012  | 0.002 | -0.077 | 0.082 |
| rs10739499 | C | 0.34 | 0.014  | 0.002 | -0.016 | 0.086 |
| rs4382592  | T | 0.30 | 0.014  | 0.002 | 0.065  | 0.093 |
| rs2073869  | C | 0.83 | 0.019  | 0.003 | 0.088  | 0.100 |
| rs1243182  | C | 0.69 | -0.019 | 0.002 | 0.170  | 0.078 |
| rs2045147  | A | 0.45 | 0.013  | 0.002 | -0.230 | 0.078 |
| rs11201422 | T | 0.67 | 0.013  | 0.002 | 0.110  | 0.094 |
| rs7089973  | C | 0.62 | -0.013 | 0.002 | -0.036 | 0.083 |
| rs11245482 | T | 0.61 | -0.013 | 0.002 | 0.033  | 0.083 |
| rs17727474 | C | 0.83 | 0.018  | 0.003 | 0.033  | 0.099 |
| rs12289262 | C | 0.73 | -0.014 | 0.002 | 0.024  | 0.089 |
| rs801733   | A | 0.64 | 0.017  | 0.002 | 0.094  | 0.076 |
| rs17207890 | G | 0.66 | 0.016  | 0.002 | -0.057 | 0.083 |
| rs11218575 | C | 0.57 | 0.015  | 0.002 | 0.074  | 0.080 |
| rs4937842  | G | 0.63 | -0.013 | 0.002 | 0.200  | 0.077 |
| rs10876864 | G | 0.43 | -0.013 | 0.002 | 0.140  | 0.074 |
| rs8756     | C | 0.48 | -0.013 | 0.002 | -0.060 | 0.078 |
| rs9563168  | G | 0.79 | 0.018  | 0.003 | 0.002  | 0.089 |
| rs9528023  | C | 0.72 | 0.013  | 0.002 | 0.120  | 0.091 |
| rs1022785  | G | 0.14 | 0.018  | 0.003 | -0.023 | 0.100 |
| rs10145592 | C | 0.41 | -0.015 | 0.002 | 0.055  | 0.079 |
| rs8043253  | C | 0.57 | -0.012 | 0.002 | 0.056  | 0.078 |
| rs2460     | G | 0.74 | -0.015 | 0.002 | -0.019 | 0.095 |
| rs7189927  | T | 0.36 | 0.015  | 0.002 | 0.051  | 0.077 |
| rs749671   | G | 0.63 | 0.016  | 0.002 | -0.045 | 0.076 |
| rs2447098  | C | 0.48 | -0.015 | 0.002 | 0.039  | 0.080 |
| rs11654952 | T | 0.86 | -0.017 | 0.003 | 0.120  | 0.110 |
| rs2584597  | T | 0.66 | 0.015  | 0.002 | -0.045 | 0.083 |

|             |   |      |        |       |        |       |
|-------------|---|------|--------|-------|--------|-------|
| rs9902312   | T | 0.68 | 0.015  | 0.002 | -0.067 | 0.080 |
| rs303753    | G | 0.65 | -0.014 | 0.002 | 0.043  | 0.081 |
| rs11081851  | G | 0.44 | -0.013 | 0.002 | 0.001  | 0.078 |
| rs9964724   | C | 0.32 | 0.018  | 0.002 | -0.029 | 0.081 |
| rs1156541   | C | 0.22 | 0.014  | 0.003 | 0.096  | 0.089 |
| rs6124476   | T | 0.59 | 0.012  | 0.002 | -0.007 | 0.078 |
| rs6031440   | A | 0.40 | 0.012  | 0.002 | 0.130  | 0.080 |
| rs7609      | A | 0.23 | 0.015  | 0.003 | -0.018 | 0.095 |
| <b>BMI</b>  |   |      |        |       |        |       |
| rs10041724  | T | 0.81 | 0.018  | 0.003 | 0.006  | 0.002 |
| rs10054327  | G | 0.58 | 0.017  | 0.002 | 0.003  | 0.002 |
| rs10145592  | C | 0.41 | -0.015 | 0.002 | -0.006 | 0.002 |
| rs10189857  | A | 0.57 | -0.020 | 0.002 | -0.007 | 0.002 |
| rs1022785   | G | 0.14 | 0.018  | 0.003 | 0.008  | 0.002 |
| rs10234444  | G | 0.82 | 0.016  | 0.003 | 0.005  | 0.002 |
| rs10246289  | A | 0.11 | 0.019  | 0.003 | 0.005  | 0.003 |
| rs1031423   | T | 0.22 | -0.019 | 0.003 | 0.004  | 0.002 |
| rs10427502  | G | 0.62 | 0.014  | 0.002 | 0.012  | 0.002 |
| rs10737620  | T | 0.27 | 0.014  | 0.002 | 0.010  | 0.002 |
| rs10771746  | C | 0.72 | -0.014 | 0.002 | -0.002 | 0.002 |
| rs10772643  | C | 0.11 | 0.025  | 0.003 | 0.010  | 0.003 |
| rs10876864  | G | 0.43 | -0.013 | 0.002 | -0.011 | 0.002 |
| rs10890123  | C | 0.77 | 0.014  | 0.003 | 0.002  | 0.002 |
| rs10932837  | C | 0.49 | -0.013 | 0.002 | 0.002  | 0.002 |
| rs10940659  | A | 0.53 | -0.013 | 0.002 | -0.007 | 0.002 |
| rs10994943  | T | 0.58 | 0.013  | 0.002 | 0.003  | 0.002 |
| rs11130793  | C | 0.60 | 0.013  | 0.002 | 0.008  | 0.002 |
| rs11201422  | T | 0.67 | 0.013  | 0.002 | 0.008  | 0.002 |
| rs11218575  | C | 0.57 | 0.015  | 0.002 | 0.003  | 0.002 |
| rs11245482  | T | 0.61 | -0.013 | 0.002 | -0.010 | 0.002 |
| rs114328297 | T | 0.78 | 0.014  | 0.003 | -0.001 | 0.002 |
| rs114600294 | G | 0.79 | -0.016 | 0.003 | -0.006 | 0.002 |
| rs1156541   | C | 0.22 | 0.014  | 0.003 | 0.011  | 0.002 |
| rs11654952  | T | 0.86 | -0.017 | 0.003 | -0.004 | 0.003 |
| rs11657730  | C | 0.64 | 0.013  | 0.002 | 0.003  | 0.002 |
| rs11689199  | A | 0.60 | 0.018  | 0.002 | 0.017  | 0.002 |
| rs11714337  | G | 0.57 | 0.014  | 0.002 | 0.007  | 0.002 |
| rs11763734  | A | 0.51 | -0.012 | 0.002 | -0.003 | 0.002 |
| rs11810109  | A | 0.70 | 0.016  | 0.002 | 0.001  | 0.002 |
| rs12105701  | C | 0.40 | -0.013 | 0.002 | -0.010 | 0.002 |
| rs12272012  | G | 0.96 | -0.030 | 0.005 | -0.009 | 0.005 |
| rs12289262  | C | 0.73 | -0.014 | 0.002 | -0.007 | 0.002 |
| rs1243182   | C | 0.69 | -0.019 | 0.002 | -0.017 | 0.002 |
| rs12491503  | G | 0.67 | -0.014 | 0.002 | -0.004 | 0.002 |
| rs12541615  | T | 0.82 | -0.018 | 0.003 | -0.015 | 0.003 |
| rs12554512  | T | 0.58 | 0.021  | 0.002 | -0.010 | 0.002 |
| rs12725114  | G | 0.80 | 0.015  | 0.003 | 0.012  | 0.002 |

|             |   |      |        |       |        |       |
|-------------|---|------|--------|-------|--------|-------|
| rs1278847   | C | 0.69 | 0.016  | 0.002 | -0.011 | 0.002 |
| rs13029509  | G | 0.52 | -0.018 | 0.002 | -0.007 | 0.002 |
| rs13107325  | C | 0.93 | -0.029 | 0.004 | -0.047 | 0.003 |
| rs138256022 | C | 0.96 | -0.031 | 0.006 | 0.002  | 0.005 |
| rs1421334   | A | 0.45 | 0.017  | 0.002 | 0.014  | 0.002 |
| rs1451533   | G | 0.72 | -0.016 | 0.002 | -0.016 | 0.002 |
| rs17207890  | G | 0.66 | 0.016  | 0.002 | 0.001  | 0.002 |
| rs17379561  | A | 0.86 | -0.025 | 0.003 | -0.018 | 0.002 |
| rs17512836  | T | 0.97 | 0.042  | 0.007 | 0.016  | 0.006 |
| rs17727474  | C | 0.83 | 0.018  | 0.003 | 0.000  | 0.002 |
| rs17789218  | T | 0.76 | 0.019  | 0.003 | -0.011 | 0.002 |
| rs2034768   | A | 0.49 | 0.015  | 0.002 | 0.020  | 0.002 |
| rs2045147   | A | 0.45 | 0.013  | 0.002 | 0.005  | 0.002 |
| rs2073869   | C | 0.83 | 0.019  | 0.003 | 0.007  | 0.002 |
| rs2164744   | T | 0.64 | -0.013 | 0.002 | -0.005 | 0.002 |
| rs2173650   | G | 0.85 | 0.018  | 0.003 | 0.004  | 0.003 |
| rs2447098   | C | 0.48 | -0.015 | 0.002 | -0.001 | 0.002 |
| rs2460      | G | 0.74 | -0.015 | 0.002 | -0.011 | 0.002 |
| rs2584597   | T | 0.66 | 0.015  | 0.002 | 0.013  | 0.004 |
| rs2616830   | G | 0.46 | 0.016  | 0.002 | 0.001  | 0.002 |
| rs262890    | A | 0.70 | -0.019 | 0.002 | -0.014 | 0.002 |
| rs2717559   | A | 0.56 | 0.012  | 0.002 | 0.004  | 0.002 |
| rs2787374   | T | 0.41 | 0.012  | 0.002 | 0.011  | 0.002 |
| rs303753    | G | 0.65 | -0.014 | 0.002 | -0.020 | 0.002 |
| rs34864022  | A | 0.93 | -0.026 | 0.004 | 0.000  | 0.004 |
| rs35574015  | T | 0.71 | -0.013 | 0.002 | 0.008  | 0.002 |
| rs374722    | G | 0.15 | 0.024  | 0.003 | 0.014  | 0.002 |
| rs3754970   | T | 0.50 | -0.015 | 0.002 | -0.005 | 0.002 |
| rs3796386   | G | 0.57 | -0.026 | 0.002 | -0.018 | 0.002 |
| rs42210     | G | 0.29 | -0.014 | 0.002 | -0.003 | 0.002 |
| rs4334769   | G | 0.47 | 0.012  | 0.002 | 0.002  | 0.002 |
| rs4382592   | T | 0.30 | 0.014  | 0.002 | 0.009  | 0.002 |
| rs4523073   | A | 0.59 | -0.014 | 0.002 | -0.003 | 0.002 |
| rs4577309   | A | 0.47 | 0.016  | 0.002 | 0.002  | 0.002 |
| rs4675246   | G | 0.80 | -0.015 | 0.003 | 0.002  | 0.002 |
| rs4775373   | T | 0.36 | 0.013  | 0.002 | 0.005  | 0.002 |
| rs4845364   | A | 0.50 | -0.015 | 0.002 | -0.001 | 0.002 |
| rs4937842   | G | 0.63 | -0.013 | 0.002 | -0.008 | 0.002 |
| rs4973576   | C | 0.30 | -0.015 | 0.002 | 0.002  | 0.002 |
| rs55700114  | G | 0.71 | -0.014 | 0.002 | -0.005 | 0.002 |
| rs56103247  | C | 0.94 | 0.030  | 0.005 | 0.023  | 0.004 |
| rs56858768  | G | 0.70 | -0.015 | 0.002 | -0.017 | 0.002 |
| rs57585211  | T | 0.83 | -0.017 | 0.003 | -0.005 | 0.003 |
| rs6131281   | C | 0.60 | 0.016  | 0.002 | 0.007  | 0.002 |
| rs6141814   | C | 0.61 | -0.014 | 0.002 | 0.002  | 0.002 |
| rs62379379  | G | 0.93 | -0.026 | 0.004 | -0.005 | 0.004 |
| rs62641636  | A | 0.69 | 0.014  | 0.002 | 0.006  | 0.002 |



|            |   |      |        |       |        |       |
|------------|---|------|--------|-------|--------|-------|
| rs6472942  | T | 0.57 | -0.013 | 0.002 | 0.017  | 0.002 |
| rs6673341  | T | 0.47 | -0.015 | 0.002 | -0.008 | 0.002 |
| rs6797840  | A | 0.46 | -0.016 | 0.002 | -0.013 | 0.002 |
| rs6825241  | C | 0.54 | -0.017 | 0.002 | -0.004 | 0.002 |
| rs6850494  | A | 0.62 | -0.014 | 0.002 | 0.001  | 0.002 |
| rs6905544  | A | 0.40 | -0.019 | 0.002 | -0.017 | 0.002 |
| rs6973656  | A | 0.60 | -0.013 | 0.002 | -0.010 | 0.002 |
| rs6996198  | C | 0.84 | -0.016 | 0.003 | -0.007 | 0.002 |
| rs7089973  | C | 0.62 | -0.013 | 0.002 | 0.000  | 0.002 |
| rs7157001  | A | 0.74 | -0.014 | 0.002 | -0.007 | 0.002 |
| rs71658797 | T | 0.88 | -0.020 | 0.003 | -0.037 | 0.003 |
| rs7184800  | G | 0.70 | 0.017  | 0.002 | -0.006 | 0.002 |
| rs7189927  | T | 0.36 | 0.015  | 0.002 | 0.026  | 0.002 |
| rs7248205  | C | 0.40 | 0.014  | 0.002 | 0.008  | 0.002 |
| rs72671494 | T | 0.86 | -0.017 | 0.003 | -0.010 | 0.003 |
| rs72781699 | G | 0.80 | -0.019 | 0.003 | 0.000  | 0.002 |
| rs72828890 | C | 0.87 | 0.019  | 0.003 | 0.011  | 0.003 |
| rs72834698 | G | 0.86 | 0.023  | 0.003 | 0.015  | 0.003 |
| rs749671   | G | 0.63 | 0.016  | 0.002 | 0.021  | 0.002 |
| rs7564130  | T | 0.64 | -0.015 | 0.002 | -0.002 | 0.002 |
| rs7693082  | G | 0.30 | 0.015  | 0.002 | 0.008  | 0.002 |
| rs7693703  | G | 0.91 | 0.023  | 0.004 | 0.005  | 0.003 |
| rs7700107  | A | 0.86 | -0.021 | 0.003 | -0.010 | 0.003 |
| rs77215114 | A | 0.93 | 0.024  | 0.004 | 0.013  | 0.004 |
| rs801733   | A | 0.64 | 0.017  | 0.002 | 0.011  | 0.002 |
| rs8043253  | C | 0.57 | -0.012 | 0.002 | -0.005 | 0.002 |
| rs8756     | C | 0.48 | -0.013 | 0.002 | 0.005  | 0.002 |
| rs9471333  | C | 0.45 | 0.013  | 0.002 | 0.021  | 0.002 |
| rs9563168  | G | 0.79 | 0.018  | 0.003 | 0.008  | 0.002 |
| rs9718104  | T | 0.94 | -0.041 | 0.005 | 0.000  | 0.004 |
| rs973734   | C | 0.15 | 0.017  | 0.003 | 0.004  | 0.002 |
| rs9834970  | T | 0.50 | 0.013  | 0.002 | 0.007  | 0.002 |
| rs984409   | G | 0.36 | -0.015 | 0.002 | -0.005 | 0.002 |
| rs9867121  | C | 0.82 | 0.019  | 0.003 | 0.008  | 0.002 |
| rs9902312  | T | 0.68 | 0.015  | 0.002 | 0.001  | 0.002 |
| rs9964724  | C | 0.32 | 0.018  | 0.002 | 0.000  | 0.002 |
| <b>WHR</b> |   |      |        |       |        |       |
| rs10041724 | T | 0.81 | 0.018  | 0.003 | 0.007  | 0.002 |
| rs10054327 | G | 0.58 | 0.017  | 0.002 | 0.007  | 0.002 |
| rs10145592 | C | 0.41 | -0.015 | 0.002 | -0.005 | 0.002 |
| rs10189857 | A | 0.57 | -0.020 | 0.002 | -0.005 | 0.002 |
| rs1022785  | G | 0.14 | 0.018  | 0.003 | 0.010  | 0.003 |
| rs10234444 | G | 0.82 | 0.016  | 0.003 | 0.006  | 0.002 |
| rs10246289 | A | 0.11 | 0.019  | 0.003 | 0.006  | 0.003 |
| rs1031423  | T | 0.22 | -0.019 | 0.003 | 0.004  | 0.002 |
| rs10427502 | G | 0.62 | 0.014  | 0.002 | 0.007  | 0.002 |
| rs10737620 | T | 0.27 | 0.014  | 0.002 | 0.006  | 0.002 |

|             |   |      |        |       |        |       |
|-------------|---|------|--------|-------|--------|-------|
| rs10771746  | C | 0.72 | -0.014 | 0.002 | 0.009  | 0.002 |
| rs10772643  | C | 0.11 | 0.025  | 0.003 | 0.008  | 0.003 |
| rs10876864  | G | 0.43 | -0.013 | 0.002 | -0.007 | 0.002 |
| rs10890123  | C | 0.77 | 0.014  | 0.003 | 0.002  | 0.002 |
| rs10932837  | C | 0.49 | -0.013 | 0.002 | -0.001 | 0.002 |
| rs10940659  | A | 0.53 | -0.013 | 0.002 | -0.009 | 0.002 |
| rs10994943  | T | 0.58 | 0.013  | 0.002 | 0.002  | 0.002 |
| rs11130793  | C | 0.60 | 0.013  | 0.002 | 0.004  | 0.002 |
| rs11201422  | T | 0.67 | 0.013  | 0.002 | 0.000  | 0.002 |
| rs11218575  | C | 0.57 | 0.015  | 0.002 | 0.001  | 0.002 |
| rs11245482  | T | 0.61 | -0.013 | 0.002 | -0.002 | 0.002 |
| rs114328297 | T | 0.78 | 0.014  | 0.003 | -0.001 | 0.002 |
| rs114600294 | G | 0.79 | -0.016 | 0.003 | -0.001 | 0.002 |
| rs1156541   | C | 0.22 | 0.014  | 0.003 | 0.010  | 0.002 |
| rs11654952  | T | 0.86 | -0.017 | 0.003 | -0.006 | 0.003 |
| rs11657730  | C | 0.64 | 0.013  | 0.002 | 0.004  | 0.002 |
| rs11689199  | A | 0.60 | 0.018  | 0.002 | 0.012  | 0.002 |
| rs11714337  | G | 0.57 | 0.014  | 0.002 | 0.005  | 0.002 |
| rs11763734  | A | 0.51 | -0.012 | 0.002 | -0.006 | 0.002 |
| rs11810109  | A | 0.70 | 0.016  | 0.002 | 0.007  | 0.002 |
| rs12105701  | C | 0.40 | -0.013 | 0.002 | -0.003 | 0.002 |
| rs12272012  | G | 0.96 | -0.030 | 0.005 | -0.009 | 0.005 |
| rs12289262  | C | 0.73 | -0.014 | 0.002 | -0.004 | 0.002 |
| rs1243182   | C | 0.69 | -0.019 | 0.002 | -0.013 | 0.002 |
| rs12491503  | G | 0.67 | -0.014 | 0.002 | -0.004 | 0.002 |
| rs12541615  | T | 0.82 | -0.018 | 0.003 | -0.007 | 0.003 |
| rs12554512  | T | 0.58 | 0.021  | 0.002 | -0.004 | 0.002 |
| rs12725114  | G | 0.80 | 0.015  | 0.003 | 0.010  | 0.002 |
| rs1278847   | C | 0.69 | 0.016  | 0.002 | -0.008 | 0.002 |
| rs13029509  | G | 0.52 | -0.018 | 0.002 | -0.006 | 0.002 |
| rs13107325  | C | 0.93 | -0.029 | 0.004 | 0.003  | 0.003 |
| rs138256022 | C | 0.96 | -0.031 | 0.006 | -0.005 | 0.005 |
| rs1421334   | A | 0.45 | 0.017  | 0.002 | 0.011  | 0.002 |
| rs1451533   | G | 0.72 | -0.016 | 0.002 | -0.006 | 0.002 |
| rs17207890  | G | 0.66 | 0.016  | 0.002 | 0.004  | 0.002 |
| rs17379561  | A | 0.86 | -0.025 | 0.003 | -0.018 | 0.003 |
| rs17512836  | T | 0.97 | 0.042  | 0.007 | 0.019  | 0.006 |
| rs17727474  | C | 0.83 | 0.018  | 0.003 | 0.004  | 0.002 |
| rs17789218  | T | 0.76 | 0.019  | 0.003 | 0.007  | 0.002 |
| rs2034768   | A | 0.49 | 0.015  | 0.002 | 0.012  | 0.002 |
| rs2045147   | A | 0.45 | 0.013  | 0.002 | 0.005  | 0.002 |
| rs2073869   | C | 0.83 | 0.019  | 0.003 | 0.007  | 0.002 |
| rs2164744   | T | 0.64 | -0.013 | 0.002 | 0.000  | 0.002 |
| rs2173650   | G | 0.85 | 0.018  | 0.003 | 0.005  | 0.003 |
| rs2447098   | C | 0.48 | -0.015 | 0.002 | 0.001  | 0.002 |
| rs2460      | G | 0.74 | -0.015 | 0.002 | -0.011 | 0.002 |
| rs2584597   | T | 0.66 | 0.015  | 0.002 | 0.007  | 0.004 |

|            |   |      |        |       |        |       |
|------------|---|------|--------|-------|--------|-------|
| rs2616830  | G | 0.46 | 0.016  | 0.002 | 0.000  | 0.002 |
| rs262890   | A | 0.70 | -0.019 | 0.002 | -0.008 | 0.002 |
| rs2717559  | A | 0.56 | 0.012  | 0.002 | 0.001  | 0.002 |
| rs2787374  | T | 0.41 | 0.012  | 0.002 | 0.000  | 0.002 |
| rs303753   | G | 0.65 | -0.014 | 0.002 | -0.010 | 0.002 |
| rs34864022 | A | 0.93 | -0.026 | 0.004 | -0.004 | 0.004 |
| rs35574015 | T | 0.71 | -0.013 | 0.002 | 0.002  | 0.002 |
| rs374722   | G | 0.15 | 0.024  | 0.003 | 0.006  | 0.003 |
| rs3754970  | T | 0.50 | -0.015 | 0.002 | -0.002 | 0.002 |
| rs3796386  | G | 0.57 | -0.026 | 0.002 | -0.011 | 0.002 |
| rs42210    | G | 0.29 | -0.014 | 0.002 | -0.004 | 0.002 |
| rs4334769  | G | 0.47 | 0.012  | 0.002 | 0.000  | 0.002 |
| rs4382592  | T | 0.30 | 0.014  | 0.002 | 0.012  | 0.002 |
| rs4523073  | A | 0.59 | -0.014 | 0.002 | -0.007 | 0.002 |
| rs4577309  | A | 0.47 | 0.016  | 0.002 | 0.003  | 0.002 |
| rs4675246  | G | 0.80 | -0.015 | 0.003 | 0.001  | 0.002 |
| rs4775373  | T | 0.36 | 0.013  | 0.002 | 0.005  | 0.002 |
| rs4845364  | A | 0.50 | -0.015 | 0.002 | 0.002  | 0.002 |
| rs4937842  | G | 0.63 | -0.013 | 0.002 | -0.004 | 0.002 |
| rs4973576  | C | 0.30 | -0.015 | 0.002 | 0.001  | 0.002 |
| rs55700114 | G | 0.71 | -0.014 | 0.002 | -0.001 | 0.002 |
| rs56103247 | C | 0.94 | 0.030  | 0.005 | 0.002  | 0.005 |
| rs56858768 | G | 0.70 | -0.015 | 0.002 | -0.010 | 0.002 |
| rs57585211 | T | 0.83 | -0.017 | 0.003 | -0.002 | 0.003 |
| rs6131281  | C | 0.60 | 0.016  | 0.002 | 0.007  | 0.002 |
| rs6141814  | C | 0.61 | -0.014 | 0.002 | 0.001  | 0.002 |
| rs62379379 | G | 0.93 | -0.026 | 0.004 | -0.004 | 0.004 |
| rs62641636 | A | 0.69 | 0.014  | 0.002 | 0.009  | 0.002 |
| rs6472942  | T | 0.57 | -0.013 | 0.002 | 0.003  | 0.002 |
| rs6673341  | T | 0.47 | -0.015 | 0.002 | -0.004 | 0.002 |
| rs6797840  | A | 0.46 | -0.016 | 0.002 | -0.007 | 0.002 |
| rs6825241  | C | 0.54 | -0.017 | 0.002 | -0.007 | 0.002 |
| rs6850494  | A | 0.62 | -0.014 | 0.002 | -0.002 | 0.002 |
| rs6905544  | A | 0.40 | -0.019 | 0.002 | -0.012 | 0.002 |
| rs6973656  | A | 0.60 | -0.013 | 0.002 | 0.010  | 0.002 |
| rs6996198  | C | 0.84 | -0.016 | 0.003 | 0.000  | 0.002 |
| rs7089973  | C | 0.62 | -0.013 | 0.002 | -0.002 | 0.002 |
| rs7157001  | A | 0.74 | -0.014 | 0.002 | -0.006 | 0.002 |
| rs71658797 | T | 0.88 | -0.020 | 0.003 | -0.010 | 0.003 |
| rs7184800  | G | 0.70 | 0.017  | 0.002 | 0.009  | 0.002 |
| rs7189927  | T | 0.36 | 0.015  | 0.002 | 0.017  | 0.002 |
| rs7248205  | C | 0.40 | 0.014  | 0.002 | -0.003 | 0.002 |
| rs72671494 | T | 0.86 | -0.017 | 0.003 | -0.009 | 0.003 |
| rs72781699 | G | 0.80 | -0.019 | 0.003 | -0.008 | 0.002 |
| rs72828890 | C | 0.87 | 0.019  | 0.003 | 0.006  | 0.003 |
| rs72834698 | G | 0.86 | 0.023  | 0.003 | 0.004  | 0.003 |
| rs749671   | G | 0.63 | 0.016  | 0.002 | 0.007  | 0.002 |

|                |   |      |        |       |        |       |
|----------------|---|------|--------|-------|--------|-------|
| rs7564130      | T | 0.64 | -0.015 | 0.002 | 0.001  | 0.002 |
| rs7693082      | G | 0.30 | 0.015  | 0.002 | 0.000  | 0.002 |
| rs7693703      | G | 0.91 | 0.023  | 0.004 | 0.001  | 0.003 |
| rs7700107      | A | 0.86 | -0.021 | 0.003 | -0.012 | 0.003 |
| rs77215114     | A | 0.93 | 0.024  | 0.004 | 0.004  | 0.004 |
| rs801733       | A | 0.64 | 0.017  | 0.002 | 0.006  | 0.002 |
| rs8043253      | C | 0.57 | -0.012 | 0.002 | 0.003  | 0.002 |
| rs8756         | C | 0.48 | -0.013 | 0.002 | -0.001 | 0.002 |
| rs9471333      | C | 0.45 | 0.013  | 0.002 | 0.014  | 0.002 |
| rs9563168      | G | 0.79 | 0.018  | 0.003 | 0.003  | 0.002 |
| rs9718104      | T | 0.94 | -0.041 | 0.005 | -0.003 | 0.004 |
| rs973734       | C | 0.15 | 0.017  | 0.003 | -0.002 | 0.003 |
| rs9834970      | T | 0.50 | 0.013  | 0.002 | 0.003  | 0.002 |
| rs984409       | G | 0.36 | -0.015 | 0.002 | -0.010 | 0.002 |
| rs9867121      | C | 0.82 | 0.019  | 0.003 | 0.004  | 0.003 |
| rs9902312      | T | 0.68 | 0.015  | 0.002 | -0.005 | 0.002 |
| rs9964724      | C | 0.32 | 0.018  | 0.002 | 0.006  | 0.002 |
| <b>Smoking</b> |   |      |        |       |        |       |
| rs10041724     | T | 0.81 | 0.018  | 0.003 | -0.002 | 0.005 |
| rs10054327     | G | 0.58 | 0.017  | 0.002 | 0.001  | 0.004 |
| rs10145592     | C | 0.41 | -0.015 | 0.002 | -0.001 | 0.004 |
| rs10189857     | A | 0.57 | -0.020 | 0.002 | 0.009  | 0.004 |
| rs1022785      | G | 0.14 | 0.018  | 0.003 | -0.002 | 0.005 |
| rs10234444     | G | 0.82 | 0.016  | 0.003 | 0.002  | 0.005 |
| rs10246289     | A | 0.11 | 0.019  | 0.003 | 0.001  | 0.006 |
| rs1031423      | T | 0.22 | -0.019 | 0.003 | 0.002  | 0.005 |
| rs10427502     | G | 0.62 | 0.014  | 0.002 | 0.010  | 0.004 |
| rs10737620     | T | 0.27 | 0.014  | 0.002 | -0.004 | 0.004 |
| rs10771746     | C | 0.72 | -0.014 | 0.002 | 0.000  | 0.004 |
| rs10772643     | C | 0.11 | 0.025  | 0.003 | -0.002 | 0.006 |
| rs10876864     | G | 0.43 | -0.013 | 0.002 | -0.001 | 0.004 |
| rs10890123     | C | 0.77 | 0.014  | 0.003 | 0.000  | 0.005 |
| rs10932837     | C | 0.49 | -0.013 | 0.002 | -0.002 | 0.004 |
| rs10940659     | A | 0.53 | -0.013 | 0.002 | -0.008 | 0.004 |
| rs10994943     | T | 0.58 | 0.013  | 0.002 | 0.005  | 0.004 |
| rs11130793     | C | 0.60 | 0.013  | 0.002 | -0.002 | 0.004 |
| rs11201422     | T | 0.67 | 0.013  | 0.002 | 0.008  | 0.004 |
| rs11218575     | C | 0.57 | 0.015  | 0.002 | -0.001 | 0.004 |
| rs11245482     | T | 0.61 | -0.013 | 0.002 | 0.003  | 0.004 |
| rs114328297    | T | 0.78 | 0.014  | 0.003 | -0.014 | 0.005 |
| rs114600294    | G | 0.79 | -0.016 | 0.003 | -0.008 | 0.005 |
| rs1156541      | C | 0.22 | 0.014  | 0.003 | -0.008 | 0.004 |
| rs11654952     | T | 0.86 | -0.017 | 0.003 | -0.005 | 0.007 |
| rs11657730     | C | 0.64 | 0.013  | 0.002 | 0.000  | 0.005 |
| rs11689199     | A | 0.60 | 0.018  | 0.002 | -0.006 | 0.004 |
| rs11714337     | G | 0.57 | 0.014  | 0.002 | -0.007 | 0.004 |
| rs11763734     | A | 0.51 | -0.012 | 0.002 | -0.007 | 0.004 |

|             |   |      |        |       |        |       |
|-------------|---|------|--------|-------|--------|-------|
| rs11810109  | A | 0.70 | 0.016  | 0.002 | -0.008 | 0.004 |
| rs12105701  | C | 0.40 | -0.013 | 0.002 | -0.002 | 0.004 |
| rs12272012  | G | 0.96 | -0.030 | 0.005 | 0.010  | 0.009 |
| rs12289262  | C | 0.73 | -0.014 | 0.002 | 0.003  | 0.004 |
| rs1243182   | C | 0.69 | -0.019 | 0.002 | -0.004 | 0.004 |
| rs12491503  | G | 0.67 | -0.014 | 0.002 | 0.008  | 0.004 |
| rs12541615  | T | 0.82 | -0.018 | 0.003 | -0.006 | 0.005 |
| rs12554512  | T | 0.58 | 0.021  | 0.002 | 0.000  | 0.004 |
| rs12725114  | G | 0.80 | 0.015  | 0.003 | 0.010  | 0.005 |
| rs1278847   | C | 0.69 | 0.016  | 0.002 | 0.002  | 0.004 |
| rs13029509  | G | 0.52 | -0.018 | 0.002 | 0.006  | 0.004 |
| rs13107325  | C | 0.93 | -0.029 | 0.004 | 0.004  | 0.009 |
| rs138256022 | C | 0.96 | -0.031 | 0.006 | 0.006  | 0.009 |
| rs1421334   | A | 0.45 | 0.017  | 0.002 | 0.000  | 0.004 |
| rs1451533   | G | 0.72 | -0.016 | 0.002 | 0.007  | 0.004 |
| rs17207890  | G | 0.66 | 0.016  | 0.002 | -0.006 | 0.005 |
| rs17379561  | A | 0.86 | -0.025 | 0.003 | 0.006  | 0.005 |
| rs17512836  | T | 0.97 | 0.042  | 0.007 | -0.004 | 0.013 |
| rs17727474  | C | 0.83 | 0.018  | 0.003 | 0.000  | 0.005 |
| rs17789218  | T | 0.76 | 0.019  | 0.003 | 0.009  | 0.005 |
| rs2034768   | A | 0.49 | 0.015  | 0.002 | -0.002 | 0.004 |
| rs2045147   | A | 0.45 | 0.013  | 0.002 | -0.011 | 0.004 |
| rs2073869   | C | 0.83 | 0.019  | 0.003 | -0.003 | 0.005 |
| rs2164744   | T | 0.64 | -0.013 | 0.002 | 0.008  | 0.004 |
| rs2173650   | G | 0.85 | 0.018  | 0.003 | 0.004  | 0.005 |
| rs2447098   | C | 0.48 | -0.015 | 0.002 | 0.011  | 0.004 |
| rs2460      | G | 0.74 | -0.015 | 0.002 | 0.008  | 0.004 |
| rs2616830   | G | 0.46 | 0.016  | 0.002 | -0.003 | 0.004 |
| rs262890    | A | 0.70 | -0.019 | 0.002 | 0.003  | 0.004 |
| rs2717559   | A | 0.56 | 0.012  | 0.002 | -0.002 | 0.004 |
| rs2787374   | T | 0.41 | 0.012  | 0.002 | -0.005 | 0.004 |
| rs303753    | G | 0.65 | -0.014 | 0.002 | 0.007  | 0.004 |
| rs34864022  | A | 0.93 | -0.026 | 0.004 | 0.016  | 0.007 |
| rs35574015  | T | 0.71 | -0.013 | 0.002 | -0.007 | 0.004 |
| rs374722    | G | 0.15 | 0.024  | 0.003 | -0.009 | 0.005 |
| rs3754970   | T | 0.50 | -0.015 | 0.002 | 0.002  | 0.004 |
| rs3796386   | G | 0.57 | -0.026 | 0.002 | 0.001  | 0.004 |
| rs42210     | G | 0.29 | -0.014 | 0.002 | 0.004  | 0.004 |
| rs4334769   | G | 0.47 | 0.012  | 0.002 | -0.005 | 0.004 |
| rs4382592   | T | 0.30 | 0.014  | 0.002 | -0.005 | 0.004 |
| rs4523073   | A | 0.59 | -0.014 | 0.002 | 0.011  | 0.004 |
| rs4577309   | A | 0.47 | 0.016  | 0.002 | -0.005 | 0.004 |
| rs4675246   | G | 0.80 | -0.015 | 0.003 | 0.000  | 0.005 |
| rs4775373   | T | 0.36 | 0.013  | 0.002 | -0.006 | 0.004 |
| rs4845364   | A | 0.50 | -0.015 | 0.002 | 0.006  | 0.004 |
| rs4937842   | G | 0.63 | -0.013 | 0.002 | 0.006  | 0.004 |
| rs4973576   | C | 0.30 | -0.015 | 0.002 | 0.003  | 0.005 |

|                 |   |      |        |       |        |       |
|-----------------|---|------|--------|-------|--------|-------|
| rs55700114      | G | 0.71 | -0.014 | 0.002 | 0.008  | 0.004 |
| rs56103247      | C | 0.94 | 0.030  | 0.005 | -0.013 | 0.009 |
| rs56858768      | G | 0.70 | -0.015 | 0.002 | 0.000  | 0.004 |
| rs57585211      | T | 0.83 | -0.017 | 0.003 | -0.003 | 0.005 |
| rs6131281       | C | 0.60 | 0.016  | 0.002 | 0.013  | 0.004 |
| rs6141814       | C | 0.61 | -0.014 | 0.002 | 0.009  | 0.004 |
| rs62379379      | G | 0.93 | -0.026 | 0.004 | 0.007  | 0.007 |
| rs62641636      | A | 0.69 | 0.014  | 0.002 | -0.012 | 0.005 |
| rs6472942       | T | 0.57 | -0.013 | 0.002 | 0.004  | 0.004 |
| rs6673341       | T | 0.47 | -0.015 | 0.002 | -0.001 | 0.004 |
| rs6797840       | A | 0.46 | -0.016 | 0.002 | -0.001 | 0.004 |
| rs6825241       | C | 0.54 | -0.017 | 0.002 | -0.004 | 0.004 |
| rs6850494       | A | 0.62 | -0.014 | 0.002 | 0.007  | 0.004 |
| rs6905544       | A | 0.40 | -0.019 | 0.002 | 0.001  | 0.004 |
| rs6973656       | A | 0.60 | -0.013 | 0.002 | -0.002 | 0.004 |
| rs6996198       | C | 0.84 | -0.016 | 0.003 | -0.003 | 0.005 |
| rs7089973       | C | 0.62 | -0.013 | 0.002 | 0.003  | 0.004 |
| rs7157001       | A | 0.74 | -0.014 | 0.002 | -0.008 | 0.004 |
| rs71658797      | T | 0.88 | -0.020 | 0.003 | 0.011  | 0.006 |
| rs7184800       | G | 0.70 | 0.017  | 0.002 | -0.004 | 0.004 |
| rs7189927       | T | 0.36 | 0.015  | 0.002 | -0.001 | 0.004 |
| rs7248205       | C | 0.40 | 0.014  | 0.002 | 0.008  | 0.004 |
| rs72671494      | T | 0.86 | -0.017 | 0.003 | 0.013  | 0.005 |
| rs72781699      | G | 0.80 | -0.019 | 0.003 | 0.006  | 0.005 |
| rs72828890      | C | 0.87 | 0.019  | 0.003 | -0.002 | 0.006 |
| rs72834698      | G | 0.86 | 0.023  | 0.003 | -0.007 | 0.005 |
| rs749671        | G | 0.63 | 0.016  | 0.002 | -0.013 | 0.004 |
| rs7564130       | T | 0.64 | -0.015 | 0.002 | 0.002  | 0.004 |
| rs7693082       | G | 0.30 | 0.015  | 0.002 | -0.003 | 0.004 |
| rs7693703       | G | 0.91 | 0.023  | 0.004 | -0.011 | 0.006 |
| rs7700107       | A | 0.86 | -0.021 | 0.003 | 0.000  | 0.006 |
| rs77215114      | A | 0.93 | 0.024  | 0.004 | 0.003  | 0.007 |
| rs801733        | A | 0.64 | 0.017  | 0.002 | -0.003 | 0.004 |
| rs8043253       | C | 0.57 | -0.012 | 0.002 | -0.007 | 0.004 |
| rs8756          | C | 0.48 | -0.013 | 0.002 | 0.004  | 0.004 |
| rs9471333       | C | 0.45 | 0.013  | 0.002 | -0.001 | 0.004 |
| rs9563168       | G | 0.79 | 0.018  | 0.003 | 0.006  | 0.005 |
| rs9718104       | T | 0.94 | -0.041 | 0.005 | -0.005 | 0.008 |
| rs973734        | C | 0.15 | 0.017  | 0.003 | -0.012 | 0.005 |
| rs9834970       | T | 0.50 | 0.013  | 0.002 | -0.007 | 0.004 |
| rs984409        | G | 0.36 | -0.015 | 0.002 | 0.004  | 0.004 |
| rs9867121       | C | 0.82 | 0.019  | 0.003 | 0.007  | 0.005 |
| rs9902312       | T | 0.68 | 0.015  | 0.002 | 0.004  | 0.004 |
| rs9964724       | C | 0.32 | 0.018  | 0.002 | -0.009 | 0.004 |
| <b>Drinking</b> |   |      |        |       |        |       |
| rs10041724      | T | 0.81 | 0.018  | 0.003 | 0.004  | 0.004 |
| rs10054327      | G | 0.58 | 0.017  | 0.002 | 0.002  | 0.003 |

|             |   |      |        |       |        |       |
|-------------|---|------|--------|-------|--------|-------|
| rs10145592  | C | 0.41 | -0.015 | 0.002 | -0.010 | 0.003 |
| rs10189857  | A | 0.57 | -0.020 | 0.002 | -0.007 | 0.003 |
| rs1022785   | G | 0.14 | 0.018  | 0.003 | -0.005 | 0.004 |
| rs10234444  | G | 0.82 | 0.016  | 0.003 | 0.000  | 0.004 |
| rs10246289  | A | 0.11 | 0.019  | 0.003 | 0.007  | 0.005 |
| rs1031423   | T | 0.22 | -0.019 | 0.003 | -0.001 | 0.004 |
| rs10427502  | G | 0.62 | 0.014  | 0.002 | 0.000  | 0.003 |
| rs10737620  | T | 0.27 | 0.014  | 0.002 | -0.001 | 0.003 |
| rs10771746  | C | 0.72 | -0.014 | 0.002 | 0.004  | 0.003 |
| rs10772643  | C | 0.11 | 0.025  | 0.003 | 0.002  | 0.005 |
| rs10876864  | G | 0.43 | -0.013 | 0.002 | -0.004 | 0.003 |
| rs10890123  | C | 0.77 | 0.014  | 0.003 | 0.003  | 0.004 |
| rs10932837  | C | 0.49 | -0.013 | 0.002 | -0.001 | 0.003 |
| rs10940659  | A | 0.53 | -0.013 | 0.002 | -0.004 | 0.003 |
| rs10994943  | T | 0.58 | 0.013  | 0.002 | 0.000  | 0.003 |
| rs11130793  | C | 0.60 | 0.013  | 0.002 | 0.003  | 0.003 |
| rs11201422  | T | 0.67 | 0.013  | 0.002 | 0.005  | 0.003 |
| rs11218575  | C | 0.57 | 0.015  | 0.002 | 0.000  | 0.003 |
| rs11245482  | T | 0.61 | -0.013 | 0.002 | -0.001 | 0.003 |
| rs114328297 | T | 0.78 | 0.014  | 0.003 | -0.007 | 0.004 |
| rs114600294 | G | 0.79 | -0.016 | 0.003 | -0.005 | 0.004 |
| rs1156541   | C | 0.22 | 0.014  | 0.003 | -0.001 | 0.004 |
| rs11654952  | T | 0.86 | -0.017 | 0.003 | 0.000  | 0.005 |
| rs11657730  | C | 0.64 | 0.013  | 0.002 | 0.002  | 0.003 |
| rs11689199  | A | 0.60 | 0.018  | 0.002 | 0.000  | 0.003 |
| rs11714337  | G | 0.57 | 0.014  | 0.002 | 0.003  | 0.003 |
| rs11763734  | A | 0.51 | -0.012 | 0.002 | 0.006  | 0.003 |
| rs11810109  | A | 0.70 | 0.016  | 0.002 | -0.003 | 0.003 |
| rs12105701  | C | 0.40 | -0.013 | 0.002 | -0.002 | 0.003 |
| rs12272012  | G | 0.96 | -0.030 | 0.005 | 0.000  | 0.007 |
| rs12289262  | C | 0.73 | -0.014 | 0.002 | 0.000  | 0.003 |
| rs1243182   | C | 0.69 | -0.019 | 0.002 | -0.003 | 0.003 |
| rs12491503  | G | 0.67 | -0.014 | 0.002 | 0.000  | 0.003 |
| rs12541615  | T | 0.82 | -0.018 | 0.003 | 0.001  | 0.004 |
| rs12554512  | T | 0.58 | 0.021  | 0.002 | 0.001  | 0.003 |
| rs12725114  | G | 0.80 | 0.015  | 0.003 | -0.003 | 0.004 |
| rs1278847   | C | 0.69 | 0.016  | 0.002 | 0.001  | 0.003 |
| rs13029509  | G | 0.52 | -0.018 | 0.002 | 0.005  | 0.003 |
| rs13107325  | C | 0.93 | -0.029 | 0.004 | -0.035 | 0.007 |
| rs138256022 | C | 0.96 | -0.031 | 0.006 | 0.005  | 0.007 |
| rs1421334   | A | 0.45 | 0.017  | 0.002 | 0.006  | 0.003 |
| rs1451533   | G | 0.72 | -0.016 | 0.002 | -0.001 | 0.003 |
| rs17207890  | G | 0.66 | 0.016  | 0.002 | -0.008 | 0.003 |
| rs17379561  | A | 0.86 | -0.025 | 0.003 | 0.003  | 0.004 |
| rs17512836  | T | 0.97 | 0.042  | 0.007 | 0.009  | 0.009 |
| rs17727474  | C | 0.83 | 0.018  | 0.003 | -0.002 | 0.004 |
| rs17789218  | T | 0.76 | 0.019  | 0.003 | 0.003  | 0.004 |

|            |   |      |        |       |        |       |
|------------|---|------|--------|-------|--------|-------|
| rs2034768  | A | 0.49 | 0.015  | 0.002 | -0.004 | 0.003 |
| rs2045147  | A | 0.45 | 0.013  | 0.002 | -0.002 | 0.003 |
| rs2073869  | C | 0.83 | 0.019  | 0.003 | 0.003  | 0.004 |
| rs2164744  | T | 0.64 | -0.013 | 0.002 | 0.006  | 0.003 |
| rs2173650  | G | 0.85 | 0.018  | 0.003 | 0.001  | 0.004 |
| rs2447098  | C | 0.48 | -0.015 | 0.002 | 0.001  | 0.003 |
| rs2460     | G | 0.74 | -0.015 | 0.002 | -0.002 | 0.003 |
| rs2616830  | G | 0.46 | 0.016  | 0.002 | 0.004  | 0.003 |
| rs262890   | A | 0.70 | -0.019 | 0.002 | 0.002  | 0.003 |
| rs2717559  | A | 0.56 | 0.012  | 0.002 | 0.003  | 0.003 |
| rs2787374  | T | 0.41 | 0.012  | 0.002 | 0.001  | 0.003 |
| rs303753   | G | 0.65 | -0.014 | 0.002 | -0.004 | 0.003 |
| rs34864022 | A | 0.93 | -0.026 | 0.004 | -0.013 | 0.006 |
| rs35574015 | T | 0.71 | -0.013 | 0.002 | 0.004  | 0.003 |
| rs374722   | G | 0.15 | 0.024  | 0.003 | 0.009  | 0.004 |
| rs3754970  | T | 0.50 | -0.015 | 0.002 | 0.008  | 0.003 |
| rs3796386  | G | 0.57 | -0.026 | 0.002 | -0.002 | 0.003 |
| rs42210    | G | 0.29 | -0.014 | 0.002 | -0.001 | 0.003 |
| rs4334769  | G | 0.47 | 0.012  | 0.002 | 0.006  | 0.003 |
| rs4382592  | T | 0.30 | 0.014  | 0.002 | 0.004  | 0.003 |
| rs4523073  | A | 0.59 | -0.014 | 0.002 | 0.005  | 0.003 |
| rs4577309  | A | 0.47 | 0.016  | 0.002 | 0.005  | 0.003 |
| rs4675246  | G | 0.80 | -0.015 | 0.003 | 0.006  | 0.004 |
| rs4775373  | T | 0.36 | 0.013  | 0.002 | -0.001 | 0.003 |
| rs4845364  | A | 0.50 | -0.015 | 0.002 | 0.004  | 0.003 |
| rs4937842  | G | 0.63 | -0.013 | 0.002 | -0.001 | 0.003 |
| rs4973576  | C | 0.30 | -0.015 | 0.002 | 0.002  | 0.004 |
| rs55700114 | G | 0.71 | -0.014 | 0.002 | 0.001  | 0.003 |
| rs56103247 | C | 0.94 | 0.030  | 0.005 | 0.006  | 0.007 |
| rs56858768 | G | 0.70 | -0.015 | 0.002 | -0.002 | 0.003 |
| rs57585211 | T | 0.83 | -0.017 | 0.003 | -0.007 | 0.004 |
| rs6131281  | C | 0.60 | 0.016  | 0.002 | -0.004 | 0.003 |
| rs6141814  | C | 0.61 | -0.014 | 0.002 | 0.005  | 0.003 |
| rs62379379 | G | 0.93 | -0.026 | 0.004 | -0.003 | 0.006 |
| rs62641636 | A | 0.69 | 0.014  | 0.002 | -0.001 | 0.003 |
| rs6472942  | T | 0.57 | -0.013 | 0.002 | -0.001 | 0.003 |
| rs6673341  | T | 0.47 | -0.015 | 0.002 | 0.004  | 0.003 |
| rs6797840  | A | 0.46 | -0.016 | 0.002 | 0.004  | 0.003 |
| rs6825241  | C | 0.54 | -0.017 | 0.002 | -0.005 | 0.003 |
| rs6850494  | A | 0.62 | -0.014 | 0.002 | 0.002  | 0.003 |
| rs6905544  | A | 0.40 | -0.019 | 0.002 | -0.009 | 0.003 |
| rs6973656  | A | 0.60 | -0.013 | 0.002 | 0.001  | 0.003 |
| rs6996198  | C | 0.84 | -0.016 | 0.003 | -0.007 | 0.004 |
| rs7089973  | C | 0.62 | -0.013 | 0.002 | -0.008 | 0.003 |
| rs7157001  | A | 0.74 | -0.014 | 0.002 | 0.001  | 0.003 |
| rs71658797 | T | 0.88 | -0.020 | 0.003 | 0.003  | 0.005 |
| rs7184800  | G | 0.70 | 0.017  | 0.002 | 0.004  | 0.003 |



|            |   |      |        |       |        |       |
|------------|---|------|--------|-------|--------|-------|
| rs7189927  | T | 0.36 | 0.015  | 0.002 | 0.015  | 0.003 |
| rs7248205  | C | 0.40 | 0.014  | 0.002 | -0.003 | 0.003 |
| rs72671494 | T | 0.86 | -0.017 | 0.003 | 0.006  | 0.004 |
| rs72781699 | G | 0.80 | -0.019 | 0.003 | -0.010 | 0.004 |
| rs72828890 | C | 0.87 | 0.019  | 0.003 | -0.007 | 0.005 |
| rs72834698 | G | 0.86 | 0.023  | 0.003 | 0.001  | 0.004 |
| rs749671   | G | 0.63 | 0.016  | 0.002 | 0.007  | 0.003 |
| rs7564130  | T | 0.64 | -0.015 | 0.002 | 0.004  | 0.003 |
| rs7693082  | G | 0.30 | 0.015  | 0.002 | -0.002 | 0.003 |
| rs7693703  | G | 0.91 | 0.023  | 0.004 | 0.008  | 0.005 |
| rs7700107  | A | 0.86 | -0.021 | 0.003 | 0.007  | 0.005 |
| rs77215114 | A | 0.93 | 0.024  | 0.004 | 0.002  | 0.005 |
| rs801733   | A | 0.64 | 0.017  | 0.002 | 0.004  | 0.003 |
| rs8043253  | C | 0.57 | -0.012 | 0.002 | -0.006 | 0.003 |
| rs8756     | C | 0.48 | -0.013 | 0.002 | -0.001 | 0.003 |
| rs9471333  | C | 0.45 | 0.013  | 0.002 | -0.001 | 0.003 |
| rs9563168  | G | 0.79 | 0.018  | 0.003 | 0.007  | 0.004 |
| rs9718104  | T | 0.94 | -0.041 | 0.005 | -0.005 | 0.006 |
| rs973734   | C | 0.15 | 0.017  | 0.003 | -0.005 | 0.004 |
| rs9834970  | T | 0.50 | 0.013  | 0.002 | -0.001 | 0.003 |
| rs984409   | G | 0.36 | -0.015 | 0.002 | 0.000  | 0.003 |
| rs9867121  | C | 0.82 | 0.019  | 0.003 | -0.004 | 0.004 |
| rs9902312  | T | 0.68 | 0.015  | 0.002 | -0.002 | 0.003 |
| rs9964724  | C | 0.32 | 0.018  | 0.002 | -0.002 | 0.003 |

**Physical activity**

|            |   |      |        |       |        |       |
|------------|---|------|--------|-------|--------|-------|
| rs10041724 | T | 0.81 | 0.018  | 0.003 | 0.004  | 0.005 |
| rs10054327 | G | 0.58 | 0.017  | 0.002 | -0.010 | 0.004 |
| rs10145592 | C | 0.41 | -0.015 | 0.002 | 0.006  | 0.004 |
| rs10189857 | A | 0.57 | -0.020 | 0.002 | -0.001 | 0.004 |
| rs1022785  | G | 0.14 | 0.018  | 0.003 | -0.001 | 0.006 |
| rs10234444 | G | 0.82 | 0.016  | 0.003 | -0.004 | 0.006 |
| rs10246289 | A | 0.11 | 0.019  | 0.003 | 0.000  | 0.007 |
| rs1031423  | T | 0.22 | -0.019 | 0.003 | -0.012 | 0.005 |
| rs10427502 | G | 0.62 | 0.014  | 0.002 | -0.009 | 0.004 |
| rs10737620 | T | 0.27 | 0.014  | 0.002 | 0.000  | 0.005 |
| rs10771746 | C | 0.72 | -0.014 | 0.002 | 0.005  | 0.005 |
| rs10772643 | C | 0.11 | 0.025  | 0.003 | -0.012 | 0.007 |
| rs10876864 | G | 0.43 | -0.013 | 0.002 | -0.016 | 0.004 |
| rs10890123 | C | 0.77 | 0.014  | 0.003 | -0.006 | 0.005 |
| rs10932837 | C | 0.49 | -0.013 | 0.002 | -0.008 | 0.004 |
| rs10940659 | A | 0.53 | -0.013 | 0.002 | 0.003  | 0.004 |
| rs10994943 | T | 0.58 | 0.013  | 0.002 | -0.005 | 0.004 |
| rs11020045 | A | 0.67 | -0.013 | 0.002 | 0.006  | 0.005 |
| rs11130793 | C | 0.60 | 0.013  | 0.002 | -0.004 | 0.004 |
| rs11201422 | T | 0.67 | 0.013  | 0.002 | -0.003 | 0.005 |
| rs11218575 | C | 0.57 | 0.015  | 0.002 | -0.006 | 0.004 |
| rs11245482 | T | 0.61 | -0.013 | 0.002 | 0.006  | 0.004 |

|             |   |      |        |       |        |       |
|-------------|---|------|--------|-------|--------|-------|
| rs114328297 | T | 0.78 | 0.014  | 0.003 | -0.001 | 0.005 |
| rs114600294 | G | 0.79 | -0.016 | 0.003 | 0.007  | 0.005 |
| rs1156541   | C | 0.22 | 0.014  | 0.003 | 0.009  | 0.005 |
| rs11654952  | T | 0.86 | -0.017 | 0.003 | 0.009  | 0.006 |
| rs11657730  | C | 0.64 | 0.013  | 0.002 | -0.008 | 0.004 |
| rs11689199  | A | 0.60 | 0.018  | 0.002 | -0.010 | 0.004 |
| rs11714337  | G | 0.57 | 0.014  | 0.002 | 0.006  | 0.004 |
| rs11763734  | A | 0.51 | -0.012 | 0.002 | 0.003  | 0.004 |
| rs11810109  | A | 0.70 | 0.016  | 0.002 | 0.005  | 0.005 |
| rs12105701  | C | 0.40 | -0.013 | 0.002 | 0.001  | 0.004 |
| rs12272012  | G | 0.96 | -0.030 | 0.005 | -0.012 | 0.010 |
| rs12289262  | C | 0.73 | -0.014 | 0.002 | -0.010 | 0.005 |
| rs1243182   | C | 0.69 | -0.019 | 0.002 | 0.018  | 0.005 |
| rs12476388  | C | 0.71 | 0.013  | 0.002 | -0.005 | 0.005 |
| rs12491503  | G | 0.67 | -0.014 | 0.002 | -0.001 | 0.005 |
| rs12541615  | T | 0.82 | -0.018 | 0.003 | 0.008  | 0.006 |
| rs12554512  | T | 0.58 | 0.021  | 0.002 | 0.002  | 0.004 |
| rs12725114  | G | 0.80 | 0.015  | 0.003 | 0.002  | 0.005 |
| rs1278847   | C | 0.69 | 0.016  | 0.002 | 0.004  | 0.005 |
| rs13029509  | G | 0.52 | -0.018 | 0.002 | 0.005  | 0.004 |
| rs13107325  | C | 0.93 | -0.029 | 0.004 | -0.010 | 0.008 |
| rs138256022 | C | 0.96 | -0.031 | 0.006 | 0.004  | 0.011 |
| rs141184308 | A | 0.98 | 0.043  | 0.008 | -0.023 | 0.015 |
| rs1421334   | A | 0.45 | 0.017  | 0.002 | -0.010 | 0.004 |
| rs1451533   | G | 0.72 | -0.016 | 0.002 | 0.008  | 0.005 |
| rs17207890  | G | 0.66 | 0.016  | 0.002 | 0.001  | 0.005 |
| rs17379561  | A | 0.86 | -0.025 | 0.003 | -0.005 | 0.006 |
| rs17512836  | T | 0.97 | 0.042  | 0.007 | -0.018 | 0.013 |
| rs17727474  | C | 0.83 | 0.018  | 0.003 | 0.000  | 0.006 |
| rs17789218  | T | 0.76 | 0.019  | 0.003 | -0.006 | 0.005 |
| rs2034768   | A | 0.49 | 0.015  | 0.002 | -0.003 | 0.004 |
| rs2045147   | A | 0.45 | 0.013  | 0.002 | -0.001 | 0.004 |
| rs2073869   | C | 0.83 | 0.019  | 0.003 | 0.007  | 0.006 |
| rs2092829   | G | 0.71 | 0.014  | 0.002 | 0.000  | 0.005 |
| rs2164744   | T | 0.64 | -0.013 | 0.002 | 0.008  | 0.004 |
| rs2173650   | G | 0.85 | 0.018  | 0.003 | 0.005  | 0.006 |
| rs2184364   | A | 0.78 | 0.016  | 0.003 | -0.001 | 0.005 |
| rs2447098   | C | 0.48 | -0.015 | 0.002 | 0.004  | 0.004 |
| rs2460      | G | 0.74 | -0.015 | 0.002 | -0.001 | 0.005 |
| rs2584597   | T | 0.66 | 0.015  | 0.002 | -0.003 | 0.005 |
| rs2616830   | G | 0.46 | 0.016  | 0.002 | -0.008 | 0.004 |
| rs262890    | A | 0.70 | -0.019 | 0.002 | -0.004 | 0.005 |
| rs2717559   | A | 0.56 | 0.012  | 0.002 | -0.005 | 0.004 |
| rs2787374   | T | 0.41 | 0.012  | 0.002 | -0.004 | 0.004 |
| rs303753    | G | 0.65 | -0.014 | 0.002 | 0.011  | 0.005 |
| rs34864022  | A | 0.93 | -0.026 | 0.004 | -0.003 | 0.009 |
| rs35574015  | T | 0.71 | -0.013 | 0.002 | 0.008  | 0.005 |

|            |   |      |        |       |        |       |
|------------|---|------|--------|-------|--------|-------|
| rs374722   | G | 0.15 | 0.024  | 0.003 | 0.001  | 0.006 |
| rs3754970  | T | 0.50 | -0.015 | 0.002 | -0.002 | 0.004 |
| rs3796386  | G | 0.57 | -0.026 | 0.002 | 0.002  | 0.004 |
| rs405797   | T | 0.25 | -0.015 | 0.003 | -0.011 | 0.005 |
| rs42210    | G | 0.29 | -0.014 | 0.002 | 0.002  | 0.005 |
| rs4334769  | G | 0.47 | 0.012  | 0.002 | 0.002  | 0.004 |
| rs4382592  | T | 0.30 | 0.014  | 0.002 | 0.004  | 0.005 |
| rs4523073  | A | 0.59 | -0.014 | 0.002 | 0.010  | 0.004 |
| rs4577309  | A | 0.47 | 0.016  | 0.002 | -0.008 | 0.004 |
| rs4675246  | G | 0.80 | -0.015 | 0.003 | 0.006  | 0.005 |
| rs4775373  | T | 0.36 | 0.013  | 0.002 | -0.002 | 0.004 |
| rs4845364  | A | 0.50 | -0.015 | 0.002 | -0.007 | 0.004 |
| rs4937842  | G | 0.63 | -0.013 | 0.002 | 0.008  | 0.004 |
| rs4973576  | C | 0.30 | -0.015 | 0.002 | -0.002 | 0.005 |
| rs55700114 | G | 0.71 | -0.014 | 0.002 | -0.002 | 0.005 |
| rs55909997 | G | 0.65 | -0.014 | 0.002 | 0.007  | 0.004 |
| rs56103247 | C | 0.94 | 0.030  | 0.005 | 0.003  | 0.009 |
| rs56858768 | G | 0.70 | -0.015 | 0.002 | -0.001 | 0.005 |
| rs57585211 | T | 0.83 | -0.017 | 0.003 | 0.000  | 0.006 |
| rs6131281  | C | 0.60 | 0.016  | 0.002 | -0.011 | 0.004 |
| rs6141814  | C | 0.61 | -0.014 | 0.002 | -0.003 | 0.004 |
| rs62379379 | G | 0.93 | -0.026 | 0.004 | -0.016 | 0.008 |
| rs62641636 | A | 0.69 | 0.014  | 0.002 | 0.004  | 0.005 |
| rs6472942  | T | 0.57 | -0.013 | 0.002 | -0.004 | 0.004 |
| rs6673341  | T | 0.47 | -0.015 | 0.002 | 0.002  | 0.004 |
| rs66852340 | C | 0.78 | -0.018 | 0.003 | 0.016  | 0.005 |
| rs6721975  | T | 0.23 | -0.017 | 0.003 | 0.007  | 0.005 |
| rs6797840  | A | 0.46 | -0.016 | 0.002 | 0.002  | 0.004 |
| rs6825241  | C | 0.54 | -0.017 | 0.002 | 0.000  | 0.004 |
| rs6850494  | A | 0.62 | -0.014 | 0.002 | 0.003  | 0.004 |
| rs6905544  | A | 0.40 | -0.019 | 0.002 | 0.004  | 0.004 |
| rs6973656  | A | 0.60 | -0.013 | 0.002 | 0.002  | 0.004 |
| rs6996198  | C | 0.84 | -0.016 | 0.003 | 0.001  | 0.006 |
| rs7089973  | C | 0.62 | -0.013 | 0.002 | 0.007  | 0.004 |
| rs7157001  | A | 0.74 | -0.014 | 0.002 | -0.007 | 0.005 |
| rs71658797 | T | 0.88 | -0.020 | 0.003 | 0.019  | 0.007 |
| rs7184800  | G | 0.70 | 0.017  | 0.002 | -0.002 | 0.005 |
| rs7189927  | T | 0.36 | 0.015  | 0.002 | 0.003  | 0.004 |
| rs7248205  | C | 0.40 | 0.014  | 0.002 | -0.007 | 0.004 |
| rs72671494 | T | 0.86 | -0.017 | 0.003 | 0.001  | 0.006 |
| rs72781699 | G | 0.80 | -0.019 | 0.003 | -0.009 | 0.005 |
| rs72828890 | C | 0.87 | 0.019  | 0.003 | -0.005 | 0.007 |
| rs72834698 | G | 0.86 | 0.023  | 0.003 | -0.006 | 0.006 |
| rs749671   | G | 0.63 | 0.016  | 0.002 | 0.004  | 0.004 |
| rs7564130  | T | 0.64 | -0.015 | 0.002 | 0.004  | 0.004 |
| rs7693082  | G | 0.30 | 0.015  | 0.002 | 0.009  | 0.005 |
| rs7693703  | G | 0.91 | 0.023  | 0.004 | 0.002  | 0.007 |

|            |   |      |        |       |        |       |
|------------|---|------|--------|-------|--------|-------|
| rs7700107  | A | 0.86 | -0.021 | 0.003 | -0.009 | 0.006 |
| rs7716447  | A | 0.64 | -0.013 | 0.002 | -0.008 | 0.004 |
| rs77215114 | A | 0.93 | 0.024  | 0.004 | -0.008 | 0.009 |
| rs7991062  | C | 0.66 | -0.018 | 0.002 | 0.005  | 0.005 |
| rs801733   | A | 0.64 | 0.017  | 0.002 | 0.000  | 0.004 |
| rs8043253  | C | 0.57 | -0.012 | 0.002 | -0.002 | 0.004 |
| rs8756     | C | 0.48 | -0.013 | 0.002 | -0.005 | 0.004 |
| rs9471333  | C | 0.45 | 0.013  | 0.002 | 0.005  | 0.004 |
| rs9563168  | G | 0.79 | 0.018  | 0.003 | 0.004  | 0.005 |
| rs9569734  | A | 0.84 | 0.019  | 0.003 | -0.011 | 0.006 |
| rs9718104  | T | 0.94 | -0.041 | 0.005 | 0.010  | 0.009 |
| rs973734   | C | 0.15 | 0.017  | 0.003 | -0.006 | 0.006 |
| rs9834970  | T | 0.50 | 0.013  | 0.002 | -0.002 | 0.004 |
| rs984409   | G | 0.36 | -0.015 | 0.002 | 0.004  | 0.004 |
| rs9867121  | C | 0.82 | 0.019  | 0.003 | -0.010 | 0.006 |
| rs9902312  | T | 0.68 | 0.015  | 0.002 | -0.008 | 0.005 |
| rs9964724  | C | 0.32 | 0.018  | 0.002 | 0.010  | 0.005 |

**Supplementary Table 20. Summary data for the genetic association between computer use and outcomes.**

| SNP         | EA | EAF  | GX     | GX_SE | GY     | GY_SE |
|-------------|----|------|--------|-------|--------|-------|
| AS          |    |      |        |       |        |       |
| rs10208088  | C  | 0.42 | 0.013  | 0.002 | 0.000  | 0.009 |
| rs10754920  | C  | 0.11 | 0.020  | 0.003 | 0.006  | 0.014 |
| rs113851275 | G  | 0.89 | -0.021 | 0.004 | -0.040 | 0.015 |
| rs11708955  | T  | 0.69 | -0.016 | 0.002 | 0.020  | 0.011 |
| rs11749912  | A  | 0.42 | 0.014  | 0.002 | -0.005 | 0.009 |
| rs12145677  | G  | 0.70 | -0.017 | 0.002 | 0.013  | 0.010 |
| rs12603813  | T  | 0.75 | 0.014  | 0.003 | -0.001 | 0.011 |
| rs12706626  | G  | 0.62 | -0.013 | 0.002 | -0.003 | 0.010 |
| rs13262595  | A  | 0.44 | -0.016 | 0.002 | 0.000  | 0.009 |
| rs136553    | C  | 0.62 | -0.015 | 0.002 | -0.002 | 0.010 |
| rs1448355   | C  | 0.38 | -0.015 | 0.002 | 0.002  | 0.011 |
| rs1469249   | G  | 0.79 | 0.016  | 0.003 | -0.028 | 0.011 |
| rs162894    | T  | 0.33 | 0.013  | 0.002 | -0.007 | 0.010 |
| rs166835    | C  | 0.44 | 0.013  | 0.002 | -0.005 | 0.009 |
| rs198262    | C  | 0.04 | 0.030  | 0.005 | 0.000  | 0.023 |
| rs2068625   | T  | 0.30 | -0.016 | 0.002 | 0.005  | 0.010 |
| rs206965    | T  | 0.21 | 0.016  | 0.003 | -0.001 | 0.012 |
| rs2220599   | C  | 0.63 | -0.016 | 0.002 | 0.010  | 0.010 |
| rs2345941   | A  | 0.55 | 0.015  | 0.002 | 0.007  | 0.009 |
| rs2734849   | A  | 0.49 | -0.014 | 0.002 | 0.002  | 0.009 |
| rs2748985   | T  | 0.45 | -0.015 | 0.002 | 0.009  | 0.010 |
| rs35933007  | G  | 0.77 | -0.015 | 0.003 | -0.005 | 0.013 |
| rs3730399   | A  | 0.93 | 0.025  | 0.004 | -0.006 | 0.018 |
| rs3944151   | A  | 0.28 | 0.014  | 0.002 | 0.001  | 0.011 |
| rs4592851   | G  | 0.75 | -0.014 | 0.003 | 0.002  | 0.011 |
| rs4702      | G  | 0.44 | 0.012  | 0.002 | -0.021 | 0.010 |
| rs4977839   | G  | 0.58 | -0.020 | 0.002 | 0.022  | 0.010 |
| rs55772938  | A  | 0.70 | -0.015 | 0.002 | -0.025 | 0.011 |
| rs6129084   | A  | 0.36 | -0.014 | 0.002 | 0.007  | 0.010 |
| rs6498759   | T  | 0.31 | 0.013  | 0.002 | -0.009 | 0.010 |
| rs66643547  | C  | 0.65 | -0.015 | 0.002 | 0.002  | 0.012 |
| rs6744254   | C  | 0.47 | -0.016 | 0.002 | -0.028 | 0.009 |
| rs6774533   | C  | 0.29 | -0.015 | 0.002 | -0.001 | 0.010 |
| rs6857629   | G  | 0.76 | 0.015  | 0.003 | 0.013  | 0.011 |
| rs6935828   | C  | 0.45 | -0.012 | 0.002 | 0.004  | 0.009 |
| rs7020477   | A  | 0.73 | 0.014  | 0.002 | -0.004 | 0.011 |
| rs7209653   | T  | 0.70 | 0.016  | 0.002 | -0.004 | 0.010 |
| rs7288455   | A  | 0.44 | 0.013  | 0.002 | -0.007 | 0.010 |
| rs73578186  | C  | 0.68 | 0.015  | 0.002 | 0.008  | 0.010 |
| rs78082503  | G  | 0.79 | -0.015 | 0.003 | 0.009  | 0.011 |
| rs784256    | G  | 0.19 | 0.019  | 0.003 | -0.012 | 0.012 |

|             |   |      |        |       |        |       |
|-------------|---|------|--------|-------|--------|-------|
| rs9372625   | G | 0.62 | -0.018 | 0.002 | 0.012  | 0.010 |
| rs9477970   | T | 0.81 | -0.016 | 0.003 | 0.010  | 0.012 |
| AIS         |   |      |        |       |        |       |
| rs10208088  | C | 0.42 | 0.013  | 0.002 | -0.004 | 0.010 |
| rs10754920  | C | 0.11 | 0.020  | 0.003 | 0.011  | 0.015 |
| rs113851275 | G | 0.89 | -0.021 | 0.004 | -0.047 | 0.016 |
| rs11708955  | T | 0.69 | -0.016 | 0.002 | 0.017  | 0.012 |
| rs11749912  | A | 0.42 | 0.014  | 0.002 | 0.002  | 0.010 |
| rs12145677  | G | 0.70 | -0.017 | 0.002 | 0.010  | 0.011 |
| rs12603813  | T | 0.75 | 0.014  | 0.003 | -0.003 | 0.012 |
| rs12706626  | G | 0.62 | -0.013 | 0.002 | -0.012 | 0.010 |
| rs13262595  | A | 0.44 | -0.016 | 0.002 | 0.000  | 0.010 |
| rs136553    | C | 0.62 | -0.015 | 0.002 | -0.010 | 0.010 |
| rs1448355   | C | 0.38 | -0.015 | 0.002 | 0.007  | 0.011 |
| rs1469249   | G | 0.79 | 0.016  | 0.003 | -0.021 | 0.013 |
| rs162894    | T | 0.33 | 0.013  | 0.002 | -0.011 | 0.011 |
| rs166835    | C | 0.44 | 0.013  | 0.002 | -0.007 | 0.010 |
| rs198262    | C | 0.04 | 0.030  | 0.005 | -0.009 | 0.026 |
| rs2068625   | T | 0.30 | -0.016 | 0.002 | 0.003  | 0.011 |
| rs206965    | T | 0.21 | 0.016  | 0.003 | 0.004  | 0.013 |
| rs2220599   | C | 0.63 | -0.016 | 0.002 | 0.011  | 0.010 |
| rs2345941   | A | 0.55 | 0.015  | 0.002 | 0.003  | 0.010 |
| rs2734849   | A | 0.49 | -0.014 | 0.002 | 0.002  | 0.010 |
| rs2748985   | T | 0.45 | -0.015 | 0.002 | 0.010  | 0.010 |
| rs35933007  | G | 0.77 | -0.015 | 0.003 | -0.010 | 0.014 |
| rs3730399   | A | 0.93 | 0.025  | 0.004 | 0.008  | 0.020 |
| rs3944151   | A | 0.28 | 0.014  | 0.002 | 0.005  | 0.011 |
| rs4592851   | G | 0.75 | -0.014 | 0.003 | 0.006  | 0.012 |
| rs4702      | G | 0.44 | 0.012  | 0.002 | -0.021 | 0.010 |
| rs4977839   | G | 0.58 | -0.020 | 0.002 | 0.020  | 0.010 |
| rs55772938  | A | 0.70 | -0.015 | 0.002 | -0.030 | 0.011 |
| rs6129084   | A | 0.36 | -0.014 | 0.002 | 0.001  | 0.010 |
| rs6498759   | T | 0.31 | 0.013  | 0.002 | -0.012 | 0.011 |
| rs66643547  | C | 0.65 | -0.015 | 0.002 | 0.009  | 0.012 |
| rs6744254   | C | 0.47 | -0.016 | 0.002 | -0.021 | 0.010 |
| rs6774533   | C | 0.29 | -0.015 | 0.002 | -0.001 | 0.011 |
| rs6857629   | G | 0.76 | 0.015  | 0.003 | 0.016  | 0.011 |
| rs6935828   | C | 0.45 | -0.012 | 0.002 | 0.000  | 0.010 |
| rs7020477   | A | 0.73 | 0.014  | 0.002 | -0.004 | 0.012 |
| rs7209653   | T | 0.70 | 0.016  | 0.002 | -0.005 | 0.011 |
| rs7288455   | A | 0.44 | 0.013  | 0.002 | -0.015 | 0.010 |
| rs73578186  | C | 0.68 | 0.015  | 0.002 | 0.018  | 0.011 |
| rs78082503  | G | 0.79 | -0.015 | 0.003 | 0.001  | 0.012 |
| rs784256    | G | 0.19 | 0.019  | 0.003 | -0.011 | 0.013 |
| rs9372625   | G | 0.62 | -0.018 | 0.002 | 0.013  | 0.010 |

|             |   |      |        |       |        |       |
|-------------|---|------|--------|-------|--------|-------|
| rs9477970   | T | 0.81 | -0.016 | 0.003 | 0.014  | 0.013 |
| CES         |   |      |        |       |        |       |
| rs10208088  | C | 0.42 | 0.013  | 0.002 | -0.027 | 0.019 |
| rs10754920  | C | 0.11 | 0.020  | 0.003 | 0.030  | 0.030 |
| rs113851275 | G | 0.89 | -0.021 | 0.004 | -0.113 | 0.030 |
| rs11708955  | T | 0.69 | -0.016 | 0.002 | 0.023  | 0.022 |
| rs11749912  | A | 0.42 | 0.014  | 0.002 | 0.012  | 0.020 |
| rs12145677  | G | 0.70 | -0.017 | 0.002 | -0.009 | 0.021 |
| rs12603813  | T | 0.75 | 0.014  | 0.003 | -0.002 | 0.022 |
| rs12706626  | G | 0.62 | -0.013 | 0.002 | -0.026 | 0.020 |
| rs13262595  | A | 0.44 | -0.016 | 0.002 | 0.007  | 0.019 |
| rs136553    | C | 0.62 | -0.015 | 0.002 | -0.016 | 0.020 |
| rs1448355   | C | 0.38 | -0.015 | 0.002 | 0.024  | 0.022 |
| rs1469249   | G | 0.79 | 0.016  | 0.003 | -0.055 | 0.024 |
| rs162894    | T | 0.33 | 0.013  | 0.002 | -0.003 | 0.020 |
| rs166835    | C | 0.44 | 0.013  | 0.002 | 0.000  | 0.020 |
| rs198262    | C | 0.04 | 0.030  | 0.005 | -0.050 | 0.054 |
| rs2068625   | T | 0.30 | -0.016 | 0.002 | -0.015 | 0.022 |
| rs206965    | T | 0.21 | 0.016  | 0.003 | 0.013  | 0.025 |
| rs2220599   | C | 0.63 | -0.016 | 0.002 | -0.013 | 0.020 |
| rs2345941   | A | 0.55 | 0.015  | 0.002 | -0.020 | 0.019 |
| rs2734849   | A | 0.49 | -0.014 | 0.002 | 0.004  | 0.019 |
| rs2748985   | T | 0.45 | -0.015 | 0.002 | 0.016  | 0.020 |
| rs35933007  | G | 0.77 | -0.015 | 0.003 | -0.047 | 0.025 |
| rs3730399   | A | 0.93 | 0.025  | 0.004 | -0.002 | 0.040 |
| rs3944151   | A | 0.28 | 0.014  | 0.002 | 0.025  | 0.022 |
| rs4592851   | G | 0.75 | -0.014 | 0.003 | 0.008  | 0.022 |
| rs4702      | G | 0.44 | 0.012  | 0.002 | -0.019 | 0.020 |
| rs4977839   | G | 0.58 | -0.020 | 0.002 | 0.006  | 0.020 |
| rs55772938  | A | 0.70 | -0.015 | 0.002 | -0.057 | 0.020 |
| rs6129084   | A | 0.36 | -0.014 | 0.002 | 0.004  | 0.020 |
| rs6498759   | T | 0.31 | 0.013  | 0.002 | -0.029 | 0.021 |
| rs66643547  | C | 0.65 | -0.015 | 0.002 | -0.033 | 0.022 |
| rs6744254   | C | 0.47 | -0.016 | 0.002 | 0.002  | 0.019 |
| rs6774533   | C | 0.29 | -0.015 | 0.002 | -0.004 | 0.021 |
| rs6857629   | G | 0.76 | 0.015  | 0.003 | 0.006  | 0.022 |
| rs6935828   | C | 0.45 | -0.012 | 0.002 | -0.001 | 0.019 |
| rs7020477   | A | 0.73 | 0.014  | 0.002 | 0.006  | 0.023 |
| rs7209653   | T | 0.70 | 0.016  | 0.002 | -0.002 | 0.021 |
| rs7288455   | A | 0.44 | 0.013  | 0.002 | -0.014 | 0.020 |
| rs73578186  | C | 0.68 | 0.015  | 0.002 | 0.021  | 0.020 |
| rs78082503  | G | 0.79 | -0.015 | 0.003 | -0.013 | 0.023 |
| rs784256    | G | 0.19 | 0.019  | 0.003 | -0.036 | 0.026 |
| rs9372625   | G | 0.62 | -0.018 | 0.002 | -0.018 | 0.020 |
| rs9477970   | T | 0.81 | -0.016 | 0.003 | 0.018  | 0.025 |

## LAS

|             |   |      |        |       |        |       |
|-------------|---|------|--------|-------|--------|-------|
| rs10208088  | C | 0.42 | 0.013  | 0.002 | 0.010  | 0.025 |
| rs10754920  | C | 0.11 | 0.020  | 0.003 | -0.041 | 0.039 |
| rs113851275 | G | 0.89 | -0.021 | 0.004 | 0.010  | 0.040 |
| rs11708955  | T | 0.69 | -0.016 | 0.002 | -0.035 | 0.029 |
| rs11749912  | A | 0.42 | 0.014  | 0.002 | 0.013  | 0.025 |
| rs12145677  | G | 0.70 | -0.017 | 0.002 | -0.003 | 0.028 |
| rs12603813  | T | 0.75 | 0.014  | 0.003 | -0.018 | 0.029 |
| rs12706626  | G | 0.62 | -0.013 | 0.002 | 0.012  | 0.026 |
| rs13262595  | A | 0.44 | -0.016 | 0.002 | 0.005  | 0.025 |
| rs136553    | C | 0.62 | -0.015 | 0.002 | 0.039  | 0.026 |
| rs1448355   | C | 0.38 | -0.015 | 0.002 | 0.009  | 0.029 |
| rs1469249   | G | 0.79 | 0.016  | 0.003 | 0.006  | 0.031 |
| rs162894    | T | 0.33 | 0.013  | 0.002 | 0.027  | 0.026 |
| rs166835    | C | 0.44 | 0.013  | 0.002 | -0.023 | 0.025 |
| rs198262    | C | 0.04 | 0.030  | 0.005 | -0.046 | 0.068 |
| rs2068625   | T | 0.30 | -0.016 | 0.002 | -0.053 | 0.029 |
| rs206965    | T | 0.21 | 0.016  | 0.003 | -0.018 | 0.034 |
| rs2220599   | C | 0.63 | -0.016 | 0.002 | 0.036  | 0.026 |
| rs2345941   | A | 0.55 | 0.015  | 0.002 | 0.024  | 0.025 |
| rs2734849   | A | 0.49 | -0.014 | 0.002 | 0.072  | 0.025 |
| rs2748985   | T | 0.45 | -0.015 | 0.002 | 0.053  | 0.026 |
| rs35933007  | G | 0.77 | -0.015 | 0.003 | -0.008 | 0.032 |
| rs3730399   | A | 0.93 | 0.025  | 0.004 | -0.023 | 0.050 |
| rs3944151   | A | 0.28 | 0.014  | 0.002 | -0.018 | 0.028 |
| rs4592851   | G | 0.75 | -0.014 | 0.003 | 0.020  | 0.029 |
| rs4702      | G | 0.44 | 0.012  | 0.002 | -0.029 | 0.026 |
| rs4977839   | G | 0.58 | -0.020 | 0.002 | 0.004  | 0.026 |
| rs55772938  | A | 0.70 | -0.015 | 0.002 | -0.040 | 0.027 |
| rs6129084   | A | 0.36 | -0.014 | 0.002 | -0.026 | 0.026 |
| rs6498759   | T | 0.31 | 0.013  | 0.002 | 0.010  | 0.027 |
| rs66643547  | C | 0.65 | -0.015 | 0.002 | -0.014 | 0.029 |
| rs6744254   | C | 0.47 | -0.016 | 0.002 | -0.031 | 0.025 |
| rs6774533   | C | 0.29 | -0.015 | 0.002 | 0.026  | 0.027 |
| rs6857629   | G | 0.76 | 0.015  | 0.003 | 0.000  | 0.028 |
| rs6935828   | C | 0.45 | -0.012 | 0.002 | -0.006 | 0.025 |
| rs7020477   | A | 0.73 | 0.014  | 0.002 | -0.032 | 0.029 |
| rs7209653   | T | 0.70 | 0.016  | 0.002 | 0.000  | 0.027 |
| rs7288455   | A | 0.44 | 0.013  | 0.002 | 0.013  | 0.026 |
| rs73578186  | C | 0.68 | 0.015  | 0.002 | 0.072  | 0.026 |
| rs78082503  | G | 0.79 | -0.015 | 0.003 | -0.008 | 0.030 |
| rs784256    | G | 0.19 | 0.019  | 0.003 | -0.033 | 0.033 |
| rs9372625   | G | 0.62 | -0.018 | 0.002 | 0.017  | 0.026 |
| rs9477970   | T | 0.81 | -0.016 | 0.003 | 0.054  | 0.032 |

## SVS



|             |   |      |        |       |        |       |
|-------------|---|------|--------|-------|--------|-------|
| rs10208088  | C | 0.42 | 0.013  | 0.002 | 0.048  | 0.024 |
| rs10754920  | C | 0.11 | 0.020  | 0.003 | 0.035  | 0.036 |
| rs113851275 | G | 0.89 | -0.021 | 0.004 | -0.025 | 0.038 |
| rs11708955  | T | 0.69 | -0.016 | 0.002 | 0.038  | 0.028 |
| rs11749912  | A | 0.42 | 0.014  | 0.002 | 0.053  | 0.024 |
| rs12145677  | G | 0.70 | -0.017 | 0.002 | 0.021  | 0.026 |
| rs12603813  | T | 0.75 | 0.014  | 0.003 | -0.002 | 0.027 |
| rs12706626  | G | 0.62 | -0.013 | 0.002 | -0.024 | 0.024 |
| rs13262595  | A | 0.44 | -0.016 | 0.002 | 0.005  | 0.023 |
| rs136553    | C | 0.62 | -0.015 | 0.002 | -0.004 | 0.025 |
| rs1448355   | C | 0.38 | -0.015 | 0.002 | 0.014  | 0.027 |
| rs1469249   | G | 0.79 | 0.016  | 0.003 | 0.004  | 0.029 |
| rs162894    | T | 0.33 | 0.013  | 0.002 | -0.030 | 0.024 |
| rs166835    | C | 0.44 | 0.013  | 0.002 | 0.001  | 0.023 |
| rs198262    | C | 0.04 | 0.030  | 0.005 | -0.055 | 0.061 |
| rs2068625   | T | 0.30 | -0.016 | 0.002 | 0.029  | 0.025 |
| rs206965    | T | 0.21 | 0.016  | 0.003 | 0.028  | 0.030 |
| rs2220599   | C | 0.63 | -0.016 | 0.002 | 0.011  | 0.024 |
| rs2345941   | A | 0.55 | 0.015  | 0.002 | -0.024 | 0.023 |
| rs2734849   | A | 0.49 | -0.014 | 0.002 | 0.010  | 0.024 |
| rs2748985   | T | 0.45 | -0.015 | 0.002 | 0.029  | 0.024 |
| rs35933007  | G | 0.77 | -0.015 | 0.003 | 0.011  | 0.030 |
| rs3730399   | A | 0.93 | 0.025  | 0.004 | 0.022  | 0.046 |
| rs3944151   | A | 0.28 | 0.014  | 0.002 | 0.015  | 0.026 |
| rs4592851   | G | 0.75 | -0.014 | 0.003 | 0.001  | 0.027 |
| rs4702      | G | 0.44 | 0.012  | 0.002 | -0.023 | 0.025 |
| rs4977839   | G | 0.58 | -0.020 | 0.002 | 0.031  | 0.024 |
| rs55772938  | A | 0.70 | -0.015 | 0.002 | -0.019 | 0.025 |
| rs6129084   | A | 0.36 | -0.014 | 0.002 | 0.042  | 0.024 |
| rs6498759   | T | 0.31 | 0.013  | 0.002 | -0.024 | 0.025 |
| rs66643547  | C | 0.65 | -0.015 | 0.002 | 0.061  | 0.027 |
| rs6744254   | C | 0.47 | -0.016 | 0.002 | -0.006 | 0.023 |
| rs6774533   | C | 0.29 | -0.015 | 0.002 | 0.031  | 0.026 |
| rs6857629   | G | 0.76 | 0.015  | 0.003 | 0.027  | 0.027 |
| rs6935828   | C | 0.45 | -0.012 | 0.002 | 0.016  | 0.023 |
| rs7020477   | A | 0.73 | 0.014  | 0.002 | 0.043  | 0.028 |
| rs7209653   | T | 0.70 | 0.016  | 0.002 | -0.005 | 0.025 |
| rs7288455   | A | 0.44 | 0.013  | 0.002 | 0.038  | 0.024 |
| rs73578186  | C | 0.68 | 0.015  | 0.002 | -0.016 | 0.024 |
| rs78082503  | G | 0.79 | -0.015 | 0.003 | -0.008 | 0.028 |
| rs784256    | G | 0.19 | 0.019  | 0.003 | 0.011  | 0.031 |
| rs9372625   | G | 0.62 | -0.018 | 0.002 | 0.048  | 0.024 |
| rs9477970   | T | 0.81 | -0.016 | 0.003 | 0.040  | 0.030 |
| ICH         |   |      |        |       |        |       |
| rs10754920  | C | 0.11 | 0.020  | 0.003 | 0.020  | 0.079 |

|               |   |      |        |       |        |       |
|---------------|---|------|--------|-------|--------|-------|
| rs113851275   | G | 0.89 | -0.021 | 0.004 | 0.155  | 0.082 |
| rs11708955    | T | 0.69 | -0.016 | 0.002 | 0.014  | 0.057 |
| rs11749912    | A | 0.42 | 0.014  | 0.002 | -0.081 | 0.053 |
| rs12145677    | G | 0.70 | -0.017 | 0.002 | -0.022 | 0.056 |
| rs12603813    | T | 0.75 | 0.014  | 0.003 | -0.049 | 0.059 |
| rs13262595    | A | 0.44 | -0.016 | 0.002 | 0.021  | 0.052 |
| rs136553      | C | 0.62 | -0.015 | 0.002 | 0.030  | 0.053 |
| rs162894      | T | 0.33 | 0.013  | 0.002 | -0.004 | 0.053 |
| rs166835      | C | 0.44 | 0.013  | 0.002 | -0.055 | 0.052 |
| rs198262      | C | 0.04 | 0.030  | 0.005 | -0.018 | 0.134 |
| rs2068625     | T | 0.30 | -0.016 | 0.002 | 0.056  | 0.055 |
| rs206965      | T | 0.21 | 0.016  | 0.003 | -0.035 | 0.063 |
| rs2345941     | A | 0.55 | 0.015  | 0.002 | 0.008  | 0.052 |
| rs2734849     | A | 0.49 | -0.014 | 0.002 | 0.036  | 0.052 |
| rs3730399     | A | 0.93 | 0.025  | 0.004 | -0.037 | 0.104 |
| rs3944151     | A | 0.28 | 0.014  | 0.002 | -0.049 | 0.058 |
| rs4592851     | G | 0.75 | -0.014 | 0.003 | -0.074 | 0.060 |
| rs4977839     | G | 0.58 | -0.020 | 0.002 | -0.016 | 0.054 |
| rs55772938    | A | 0.70 | -0.015 | 0.002 | -0.013 | 0.056 |
| rs6129084     | A | 0.36 | -0.014 | 0.002 | 0.056  | 0.054 |
| rs6498759     | T | 0.31 | 0.013  | 0.002 | -0.017 | 0.055 |
| rs6744254     | C | 0.47 | -0.016 | 0.002 | 0.005  | 0.051 |
| rs6774533     | C | 0.29 | -0.015 | 0.002 | 0.020  | 0.054 |
| rs6857629     | G | 0.76 | 0.015  | 0.003 | -0.089 | 0.059 |
| rs6935828     | C | 0.45 | -0.012 | 0.002 | 0.034  | 0.051 |
| rs7209653     | T | 0.70 | 0.016  | 0.002 | -0.054 | 0.057 |
| rs7288455     | A | 0.44 | 0.013  | 0.002 | 0.028  | 0.052 |
| rs73578186    | C | 0.68 | 0.015  | 0.002 | -0.029 | 0.053 |
| rs78082503    | G | 0.79 | -0.015 | 0.003 | 0.029  | 0.062 |
| rs784256      | G | 0.19 | 0.019  | 0.003 | -0.039 | 0.066 |
| rs9372625     | G | 0.62 | -0.018 | 0.002 | 0.058  | 0.053 |
| rs9477970     | T | 0.81 | -0.016 | 0.003 | -0.024 | 0.066 |
| non-lobar ICH |   |      |        |       |        |       |
| rs10754920    | C | 0.11 | 0.020  | 0.003 | -0.013 | 0.095 |
| rs113851275   | G | 0.89 | -0.021 | 0.004 | 0.187  | 0.098 |
| rs11708955    | T | 0.69 | -0.016 | 0.002 | 0.031  | 0.068 |
| rs11749912    | A | 0.42 | 0.014  | 0.002 | -0.077 | 0.063 |
| rs12145677    | G | 0.70 | -0.017 | 0.002 | -0.033 | 0.067 |
| rs12603813    | T | 0.75 | 0.014  | 0.003 | -0.032 | 0.070 |
| rs13262595    | A | 0.44 | -0.016 | 0.002 | 0.057  | 0.062 |
| rs136553      | C | 0.62 | -0.015 | 0.002 | 0.005  | 0.063 |
| rs162894      | T | 0.33 | 0.013  | 0.002 | -0.048 | 0.064 |
| rs166835      | C | 0.44 | 0.013  | 0.002 | -0.065 | 0.061 |
| rs198262      | C | 0.04 | 0.030  | 0.005 | 0.025  | 0.159 |
| rs2068625     | T | 0.30 | -0.016 | 0.002 | 0.071  | 0.066 |

|             |   |      |        |       |        |       |
|-------------|---|------|--------|-------|--------|-------|
| rs206965    | T | 0.21 | 0.016  | 0.003 | -0.013 | 0.074 |
| rs2345941   | A | 0.55 | 0.015  | 0.002 | -0.038 | 0.061 |
| rs2734849   | A | 0.49 | -0.014 | 0.002 | 0.029  | 0.062 |
| rs3730399   | A | 0.93 | 0.025  | 0.004 | -0.022 | 0.123 |
| rs3944151   | A | 0.28 | 0.014  | 0.002 | 0.001  | 0.069 |
| rs4592851   | G | 0.75 | -0.014 | 0.003 | -0.029 | 0.072 |
| rs4977839   | G | 0.58 | -0.020 | 0.002 | 0.053  | 0.064 |
| rs55772938  | A | 0.70 | -0.015 | 0.002 | -0.011 | 0.066 |
| rs6129084   | A | 0.36 | -0.014 | 0.002 | 0.060  | 0.064 |
| rs6498759   | T | 0.31 | 0.013  | 0.002 | -0.009 | 0.066 |
| rs6744254   | C | 0.47 | -0.016 | 0.002 | -0.013 | 0.061 |
| rs6774533   | C | 0.29 | -0.015 | 0.002 | 0.024  | 0.065 |
| rs6857629   | G | 0.76 | 0.015  | 0.003 | -0.047 | 0.069 |
| rs6935828   | C | 0.45 | -0.012 | 0.002 | 0.038  | 0.060 |
| rs7209653   | T | 0.70 | 0.016  | 0.002 | -0.105 | 0.066 |
| rs7288455   | A | 0.44 | 0.013  | 0.002 | 0.016  | 0.063 |
| rs73578186  | C | 0.68 | 0.015  | 0.002 | -0.015 | 0.063 |
| rs78082503  | G | 0.79 | -0.015 | 0.003 | 0.063  | 0.074 |
| rs784256    | G | 0.19 | 0.019  | 0.003 | -0.046 | 0.079 |
| rs9372625   | G | 0.62 | -0.018 | 0.002 | 0.070  | 0.063 |
| rs9477970   | T | 0.81 | -0.016 | 0.003 | 0.016  | 0.079 |
| lobar ICH   |   |      |        |       |        |       |
| rs10754920  | C | 0.11 | 0.020  | 0.003 | 0.125  | 0.102 |
| rs113851275 | G | 0.89 | -0.021 | 0.004 | 0.140  | 0.110 |
| rs11708955  | T | 0.69 | -0.016 | 0.002 | 0.026  | 0.073 |
| rs11749912  | A | 0.42 | 0.014  | 0.002 | -0.091 | 0.068 |
| rs12145677  | G | 0.70 | -0.017 | 0.002 | -0.015 | 0.073 |
| rs13262595  | A | 0.44 | -0.016 | 0.002 | 0.001  | 0.068 |
| rs136553    | C | 0.62 | -0.015 | 0.002 | 0.078  | 0.069 |
| rs162894    | T | 0.33 | 0.013  | 0.002 | 0.011  | 0.068 |
| rs166835    | C | 0.44 | 0.013  | 0.002 | -0.017 | 0.068 |
| rs198262    | C | 0.04 | 0.030  | 0.005 | -0.048 | 0.179 |
| rs2068625   | T | 0.30 | -0.016 | 0.002 | 0.045  | 0.071 |
| rs206965    | T | 0.21 | 0.016  | 0.003 | -0.115 | 0.082 |
| rs2345941   | A | 0.55 | 0.015  | 0.002 | 0.084  | 0.069 |
| rs2734849   | A | 0.49 | -0.014 | 0.002 | 0.035  | 0.068 |
| rs3730399   | A | 0.93 | 0.025  | 0.004 | -0.014 | 0.138 |
| rs3944151   | A | 0.28 | 0.014  | 0.002 | -0.097 | 0.076 |
| rs4592851   | G | 0.75 | -0.014 | 0.003 | -0.150 | 0.077 |
| rs4977839   | G | 0.58 | -0.020 | 0.002 | -0.110 | 0.070 |
| rs55772938  | A | 0.70 | -0.015 | 0.002 | -0.015 | 0.074 |
| rs6129084   | A | 0.36 | -0.014 | 0.002 | 0.074  | 0.070 |
| rs6498759   | T | 0.31 | 0.013  | 0.002 | -0.061 | 0.072 |
| rs6744254   | C | 0.47 | -0.016 | 0.002 | 0.029  | 0.067 |
| rs6774533   | C | 0.29 | -0.015 | 0.002 | -0.013 | 0.072 |

|             |   |      |        |       |        |       |
|-------------|---|------|--------|-------|--------|-------|
| rs6857629   | G | 0.76 | 0.015  | 0.003 | -0.161 | 0.076 |
| rs6935828   | C | 0.45 | -0.012 | 0.002 | 0.037  | 0.067 |
| rs7209653   | T | 0.70 | 0.016  | 0.002 | 0.029  | 0.074 |
| rs73578186  | C | 0.68 | 0.015  | 0.002 | -0.040 | 0.070 |
| rs78082503  | G | 0.79 | -0.015 | 0.003 | 0.000  | 0.079 |
| rs784256    | G | 0.19 | 0.019  | 0.003 | -0.028 | 0.087 |
| rs9477970   | T | 0.81 | -0.016 | 0.003 | -0.068 | 0.085 |
| WMH         |   |      |        |       |        |       |
| rs10208088  | C | 0.42 | 0.013  | 0.002 | -0.007 | 0.013 |
| rs10754920  | C | 0.11 | 0.020  | 0.003 | 0.000  | 0.020 |
| rs113851275 | G | 0.89 | -0.021 | 0.004 | -0.042 | 0.020 |
| rs11749912  | A | 0.42 | 0.014  | 0.002 | -0.025 | 0.013 |
| rs12145677  | G | 0.70 | -0.017 | 0.002 | -0.005 | 0.014 |
| rs12603813  | T | 0.75 | 0.014  | 0.003 | 0.063  | 0.014 |
| rs12706626  | G | 0.62 | -0.013 | 0.002 | 0.004  | 0.013 |
| rs13262595  | A | 0.44 | -0.016 | 0.002 | -0.001 | 0.013 |
| rs136553    | C | 0.62 | -0.015 | 0.002 | -0.023 | 0.013 |
| rs1448355   | C | 0.38 | -0.015 | 0.002 | -0.001 | 0.013 |
| rs1469249   | G | 0.79 | 0.016  | 0.003 | -0.009 | 0.015 |
| rs162894    | T | 0.33 | 0.013  | 0.002 | 0.015  | 0.013 |
| rs166835    | C | 0.44 | 0.013  | 0.002 | 0.002  | 0.013 |
| rs198262    | C | 0.04 | 0.030  | 0.005 | -0.027 | 0.031 |
| rs2068625   | T | 0.30 | -0.016 | 0.002 | 0.014  | 0.014 |
| rs206965    | T | 0.21 | 0.016  | 0.003 | 0.002  | 0.015 |
| rs2220599   | C | 0.63 | -0.016 | 0.002 | 0.004  | 0.013 |
| rs2345941   | A | 0.55 | 0.015  | 0.002 | -0.008 | 0.012 |
| rs2734849   | A | 0.49 | -0.014 | 0.002 | -0.005 | 0.012 |
| rs2748985   | T | 0.45 | -0.015 | 0.002 | -0.033 | 0.013 |
| rs35933007  | G | 0.77 | -0.015 | 0.003 | -0.004 | 0.015 |
| rs3730399   | A | 0.93 | 0.025  | 0.004 | 0.015  | 0.025 |
| rs3944151   | A | 0.28 | 0.014  | 0.002 | 0.000  | 0.014 |
| rs4702      | G | 0.44 | 0.012  | 0.002 | -0.003 | 0.012 |
| rs4977839   | G | 0.58 | -0.020 | 0.002 | -0.003 | 0.013 |
| rs55772938  | A | 0.70 | -0.015 | 0.002 | -0.013 | 0.014 |
| rs6129084   | A | 0.36 | -0.014 | 0.002 | -0.021 | 0.013 |
| rs6498759   | T | 0.31 | 0.013  | 0.002 | -0.013 | 0.014 |
| rs66643547  | C | 0.65 | -0.015 | 0.002 | 0.007  | 0.013 |
| rs6744254   | C | 0.47 | -0.016 | 0.002 | -0.005 | 0.012 |
| rs6774533   | C | 0.29 | -0.015 | 0.002 | 0.010  | 0.014 |
| rs6857629   | G | 0.76 | 0.015  | 0.003 | 0.023  | 0.014 |
| rs6935828   | C | 0.45 | -0.012 | 0.002 | 0.022  | 0.012 |
| rs7020477   | A | 0.73 | 0.014  | 0.002 | 0.022  | 0.014 |
| rs7209653   | T | 0.70 | 0.016  | 0.002 | -0.014 | 0.014 |
| rs7288455   | A | 0.44 | 0.013  | 0.002 | -0.006 | 0.012 |
| rs73578186  | C | 0.68 | 0.015  | 0.002 | 0.007  | 0.013 |

|             |   |      |        |       |        |       |
|-------------|---|------|--------|-------|--------|-------|
| rs78082503  | G | 0.79 | -0.015 | 0.003 | -0.025 | 0.015 |
| rs784256    | G | 0.19 | 0.019  | 0.003 | 0.027  | 0.016 |
| rs9372625   | G | 0.62 | -0.018 | 0.002 | 0.030  | 0.013 |
| rs9477970   | T | 0.81 | -0.016 | 0.003 | 0.008  | 0.015 |
| AD          |   |      |        |       |        |       |
| rs10208088  | C | 0.42 | 0.013  | 0.002 | -0.021 | 0.014 |
| rs10754920  | C | 0.11 | 0.020  | 0.003 | -0.015 | 0.022 |
| rs113851275 | G | 0.89 | -0.021 | 0.004 | -0.037 | 0.025 |
| rs11708955  | T | 0.69 | -0.016 | 0.002 | 0.013  | 0.016 |
| rs11749912  | A | 0.42 | 0.014  | 0.002 | -0.038 | 0.015 |
| rs12145677  | G | 0.70 | -0.017 | 0.002 | 0.008  | 0.016 |
| rs12603813  | T | 0.75 | 0.014  | 0.003 | -0.010 | 0.017 |
| rs12706626  | G | 0.62 | -0.013 | 0.002 | -0.006 | 0.015 |
| rs13262595  | A | 0.44 | -0.016 | 0.002 | 0.019  | 0.014 |
| rs136553    | C | 0.62 | -0.015 | 0.002 | -0.007 | 0.015 |
| rs1448355   | C | 0.38 | -0.015 | 0.002 | 0.018  | 0.015 |
| rs1469249   | G | 0.79 | 0.016  | 0.003 | 0.002  | 0.018 |
| rs162894    | T | 0.33 | 0.013  | 0.002 | 0.006  | 0.015 |
| rs166835    | C | 0.44 | 0.013  | 0.002 | -0.012 | 0.014 |
| rs198262    | C | 0.04 | 0.030  | 0.005 | 0.020  | 0.036 |
| rs2068625   | T | 0.30 | -0.016 | 0.002 | 0.014  | 0.016 |
| rs206965    | T | 0.21 | 0.016  | 0.003 | -0.011 | 0.017 |
| rs2220599   | C | 0.63 | -0.016 | 0.002 | 0.020  | 0.015 |
| rs2345941   | A | 0.55 | 0.015  | 0.002 | -0.010 | 0.014 |
| rs2734849   | A | 0.49 | -0.014 | 0.002 | -0.008 | 0.014 |
| rs2748985   | T | 0.45 | -0.015 | 0.002 | -0.004 | 0.015 |
| rs35933007  | G | 0.77 | -0.015 | 0.003 | -0.023 | 0.020 |
| rs3730399   | A | 0.93 | 0.025  | 0.004 | -0.014 | 0.030 |
| rs3944151   | A | 0.28 | 0.014  | 0.002 | 0.047  | 0.016 |
| rs4592851   | G | 0.75 | -0.014 | 0.003 | -0.005 | 0.017 |
| rs4702      | G | 0.44 | 0.012  | 0.002 | -0.022 | 0.015 |
| rs4977839   | G | 0.58 | -0.020 | 0.002 | 0.029  | 0.016 |
| rs55772938  | A | 0.70 | -0.015 | 0.002 | 0.015  | 0.016 |
| rs6129084   | A | 0.36 | -0.014 | 0.002 | -0.015 | 0.015 |
| rs6498759   | T | 0.31 | 0.013  | 0.002 | -0.002 | 0.015 |
| rs66643547  | C | 0.65 | -0.015 | 0.002 | 0.020  | 0.018 |
| rs6744254   | C | 0.47 | -0.016 | 0.002 | 0.019  | 0.014 |
| rs6774533   | C | 0.29 | -0.015 | 0.002 | 0.006  | 0.015 |
| rs6857629   | G | 0.76 | 0.015  | 0.003 | 0.004  | 0.017 |
| rs7020477   | A | 0.73 | 0.014  | 0.002 | -0.010 | 0.017 |
| rs7209653   | T | 0.70 | 0.016  | 0.002 | -0.036 | 0.016 |
| rs7288455   | A | 0.44 | 0.013  | 0.002 | -0.003 | 0.015 |
| rs73578186  | C | 0.68 | 0.015  | 0.002 | -0.007 | 0.015 |
| rs78082503  | G | 0.79 | -0.015 | 0.003 | 0.027  | 0.017 |
| rs784256    | G | 0.19 | 0.019  | 0.003 | 0.011  | 0.018 |

|             |   |      |        |       |        |       |
|-------------|---|------|--------|-------|--------|-------|
| rs9372625   | G | 0.62 | -0.018 | 0.002 | 0.032  | 0.015 |
| rs9477970   | T | 0.81 | -0.016 | 0.003 | 0.018  | 0.018 |
| PD          |   |      |        |       |        |       |
| rs10208088  | C | 0.42 | 0.013  | 0.002 | 0.002  | 0.023 |
| rs10754920  | C | 0.11 | 0.020  | 0.003 | 0.044  | 0.034 |
| rs113851275 | G | 0.89 | -0.021 | 0.004 | -0.017 | 0.030 |
| rs11749912  | A | 0.42 | 0.014  | 0.002 | 0.010  | 0.023 |
| rs12145677  | G | 0.70 | -0.017 | 0.002 | 0.001  | 0.020 |
| rs12603813  | T | 0.75 | 0.014  | 0.003 | -0.037 | 0.022 |
| rs12706626  | G | 0.62 | -0.013 | 0.002 | 0.027  | 0.019 |
| rs13262595  | A | 0.44 | -0.016 | 0.002 | 0.003  | 0.018 |
| rs136553    | C | 0.62 | -0.015 | 0.002 | 0.005  | 0.023 |
| rs1448355   | C | 0.38 | -0.015 | 0.002 | 0.007  | 0.023 |
| rs1469249   | G | 0.79 | 0.016  | 0.003 | 0.076  | 0.027 |
| rs162894    | T | 0.33 | 0.013  | 0.002 | -0.001 | 0.019 |
| rs166835    | C | 0.44 | 0.013  | 0.002 | -0.016 | 0.023 |
| rs198262    | C | 0.04 | 0.030  | 0.005 | 0.027  | 0.057 |
| rs2068625   | T | 0.30 | -0.016 | 0.002 | -0.004 | 0.021 |
| rs206965    | T | 0.21 | 0.016  | 0.003 | -0.028 | 0.022 |
| rs2220599   | C | 0.63 | -0.016 | 0.002 | 0.005  | 0.023 |
| rs2345941   | A | 0.55 | 0.015  | 0.002 | 0.014  | 0.020 |
| rs2734849   | A | 0.49 | -0.014 | 0.002 | 0.032  | 0.017 |
| rs2748985   | T | 0.45 | -0.015 | 0.002 | 0.010  | 0.019 |
| rs35933007  | G | 0.77 | -0.015 | 0.003 | 0.004  | 0.025 |
| rs3730399   | A | 0.93 | 0.025  | 0.004 | 0.049  | 0.035 |
| rs3944151   | A | 0.28 | 0.014  | 0.002 | 0.048  | 0.025 |
| rs4702      | G | 0.44 | 0.012  | 0.002 | 0.028  | 0.020 |
| rs4977839   | G | 0.58 | -0.020 | 0.002 | 0.016  | 0.023 |
| rs55772938  | A | 0.70 | -0.015 | 0.002 | 0.014  | 0.025 |
| rs6129084   | A | 0.36 | -0.014 | 0.002 | -0.023 | 0.018 |
| rs6498759   | T | 0.31 | 0.013  | 0.002 | -0.018 | 0.024 |
| rs66643547  | C | 0.65 | -0.015 | 0.002 | 0.015  | 0.026 |
| rs6744254   | C | 0.47 | -0.016 | 0.002 | 0.018  | 0.020 |
| rs6774533   | C | 0.29 | -0.015 | 0.002 | -0.034 | 0.029 |
| rs6857629   | G | 0.76 | 0.015  | 0.003 | -0.036 | 0.022 |
| rs6935828   | C | 0.45 | -0.012 | 0.002 | -0.002 | 0.022 |
| rs7020477   | A | 0.73 | 0.014  | 0.002 | -0.007 | 0.023 |
| rs7209653   | T | 0.70 | 0.016  | 0.002 | -0.011 | 0.020 |
| rs7288455   | A | 0.44 | 0.013  | 0.002 | 0.004  | 0.023 |
| rs73578186  | C | 0.68 | 0.015  | 0.002 | -0.026 | 0.023 |
| rs78082503  | G | 0.79 | -0.015 | 0.003 | -0.014 | 0.027 |
| rs784256    | G | 0.19 | 0.019  | 0.003 | -0.021 | 0.024 |
| rs9372625   | G | 0.62 | -0.018 | 0.002 | -0.051 | 0.023 |
| rs9477970   | T | 0.81 | -0.016 | 0.003 | 0.017  | 0.029 |
| MS          |   |      |        |       |        |       |

|             |   |      |        |       |        |       |
|-------------|---|------|--------|-------|--------|-------|
| rs10208088  | C | 0.42 | 0.013  | 0.002 | 0.011  | 0.193 |
| rs10754920  | C | 0.11 | 0.020  | 0.003 | 0.024  | 0.061 |
| rs11708955  | T | 0.69 | -0.016 | 0.002 | -0.005 | 0.008 |
| rs11749912  | A | 0.42 | 0.014  | 0.002 | 0.032  | 0.020 |
| rs12145677  | G | 0.70 | -0.017 | 0.002 | 0.009  | 0.039 |
| rs12603813  | T | 0.75 | 0.014  | 0.003 | -0.015 | 0.094 |
| rs12706626  | G | 0.62 | -0.013 | 0.002 | -0.042 | 0.019 |
| rs13262595  | A | 0.44 | -0.016 | 0.002 | -0.024 | 0.022 |
| rs136553    | C | 0.62 | -0.015 | 0.002 | -0.021 | 0.026 |
| rs1448355   | C | 0.38 | -0.015 | 0.002 | -0.002 | 0.001 |
| rs1469249   | G | 0.79 | 0.016  | 0.003 | 0.034  | 0.026 |
| rs162894    | T | 0.33 | 0.013  | 0.002 | 0.000  | 0.000 |
| rs166835    | C | 0.44 | 0.013  | 0.002 | -0.012 | 0.115 |
| rs198262    | C | 0.04 | 0.030  | 0.005 | 0.058  | 0.055 |
| rs2068625   | T | 0.30 | -0.016 | 0.002 | -0.018 | 0.039 |
| rs206965    | T | 0.21 | 0.016  | 0.003 | 0.038  | 0.024 |
| rs2220599   | C | 0.63 | -0.016 | 0.002 | -0.012 | 0.254 |
| rs2345941   | A | 0.55 | 0.015  | 0.002 | 0.011  | 0.384 |
| rs2734849   | A | 0.49 | -0.014 | 0.002 | 0.019  | 0.027 |
| rs2748985   | T | 0.45 | -0.015 | 0.002 | 0.049  | 0.019 |
| rs35933007  | G | 0.77 | -0.015 | 0.003 | 0.000  | 0.000 |
| rs3730399   | A | 0.93 | 0.025  | 0.004 | -0.027 | 0.110 |
| rs3944151   | A | 0.28 | 0.014  | 0.002 | 0.048  | 0.020 |
| rs4592851   | G | 0.75 | -0.014 | 0.003 | 0.006  | 0.009 |
| rs4702      | G | 0.44 | 0.012  | 0.002 | 0.003  | 0.003 |
| rs4977839   | G | 0.58 | -0.020 | 0.002 | -0.007 | 0.013 |
| rs55772938  | A | 0.70 | -0.015 | 0.002 | -0.014 | 0.084 |
| rs6129084   | A | 0.36 | -0.014 | 0.002 | -0.010 | 0.084 |
| rs6498759   | T | 0.31 | 0.013  | 0.002 | -0.002 | 0.002 |
| rs66643547  | C | 0.65 | -0.015 | 0.002 | -0.014 | 0.032 |
| rs6744254   | C | 0.47 | -0.016 | 0.002 | -0.018 | 0.029 |
| rs6774533   | C | 0.29 | -0.015 | 0.002 | 0.019  | 0.033 |
| rs6857629   | G | 0.76 | 0.015  | 0.003 | -0.027 | 0.025 |
| rs6935828   | C | 0.45 | -0.012 | 0.002 | -0.009 | 0.032 |
| rs7020477   | A | 0.73 | 0.014  | 0.002 | -0.001 | 0.000 |
| rs7209653   | T | 0.70 | 0.016  | 0.002 | 0.005  | 0.006 |
| rs7288455   | A | 0.44 | 0.013  | 0.002 | -0.014 | 0.074 |
| rs73578186  | C | 0.68 | 0.015  | 0.002 | 0.014  | 0.072 |
| rs784256    | G | 0.19 | 0.019  | 0.003 | 0.026  | 0.034 |
| rs9372625   | G | 0.62 | -0.018 | 0.002 | 0.022  | 0.026 |
| rs9477970   | T | 0.81 | -0.016 | 0.003 | 0.006  | 0.009 |
| SBP         |   |      |        |       |        |       |
| rs10208088  | C | 0.42 | 0.013  | 0.002 | -0.097 | 0.031 |
| rs10754920  | C | 0.11 | 0.020  | 0.003 | -0.166 | 0.047 |
| rs113851275 | G | 0.89 | -0.021 | 0.004 | 0.033  | 0.049 |

|             |   |      |        |       |        |       |
|-------------|---|------|--------|-------|--------|-------|
| rs11749912  | A | 0.42 | 0.014  | 0.002 | 0.085  | 0.031 |
| rs12145677  | G | 0.70 | -0.017 | 0.002 | -0.043 | 0.033 |
| rs12603813  | T | 0.75 | 0.014  | 0.003 | -0.433 | 0.035 |
| rs12706626  | G | 0.62 | -0.013 | 0.002 | -0.026 | 0.032 |
| rs13262595  | A | 0.44 | -0.016 | 0.002 | 0.185  | 0.031 |
| rs136553    | C | 0.62 | -0.015 | 0.002 | 0.026  | 0.031 |
| rs1448355   | C | 0.38 | -0.015 | 0.002 | -0.083 | 0.031 |
| rs1469249   | G | 0.79 | 0.016  | 0.003 | -0.156 | 0.037 |
| rs162894    | T | 0.33 | 0.013  | 0.002 | 0.038  | 0.032 |
| rs166835    | C | 0.44 | 0.013  | 0.002 | -0.103 | 0.030 |
| rs198262    | C | 0.04 | 0.030  | 0.005 | -0.036 | 0.074 |
| rs2068625   | T | 0.30 | -0.016 | 0.002 | 0.019  | 0.033 |
| rs206965    | T | 0.21 | 0.016  | 0.003 | -0.025 | 0.037 |
| rs2220599   | C | 0.63 | -0.016 | 0.002 | 0.122  | 0.031 |
| rs2345941   | A | 0.55 | 0.015  | 0.002 | -0.026 | 0.030 |
| rs2734849   | A | 0.49 | -0.014 | 0.002 | 0.057  | 0.030 |
| rs2748985   | T | 0.45 | -0.015 | 0.002 | 0.285  | 0.031 |
| rs35933007  | G | 0.77 | -0.015 | 0.003 | -0.006 | 0.038 |
| rs3730399   | A | 0.93 | 0.025  | 0.004 | -0.037 | 0.060 |
| rs3944151   | A | 0.28 | 0.014  | 0.002 | 0.002  | 0.034 |
| rs4702      | G | 0.44 | 0.012  | 0.002 | -0.432 | 0.031 |
| rs4977839   | G | 0.58 | -0.020 | 0.002 | 0.006  | 0.031 |
| rs55772938  | A | 0.70 | -0.015 | 0.002 | -0.013 | 0.033 |
| rs6129084   | A | 0.36 | -0.014 | 0.002 | -0.009 | 0.032 |
| rs6498759   | T | 0.31 | 0.013  | 0.002 | -0.051 | 0.032 |
| rs66643547  | C | 0.65 | -0.015 | 0.002 | 0.197  | 0.033 |
| rs6744254   | C | 0.47 | -0.016 | 0.002 | 0.044  | 0.030 |
| rs6774533   | C | 0.29 | -0.015 | 0.002 | 0.075  | 0.034 |
| rs6857629   | G | 0.76 | 0.015  | 0.003 | -0.003 | 0.035 |
| rs6935828   | C | 0.45 | -0.012 | 0.002 | -0.032 | 0.030 |
| rs7020477   | A | 0.73 | 0.014  | 0.002 | 0.058  | 0.035 |
| rs7209653   | T | 0.70 | 0.016  | 0.002 | -0.130 | 0.033 |
| rs7288455   | A | 0.44 | 0.013  | 0.002 | -0.044 | 0.031 |
| rs73578186  | C | 0.68 | 0.015  | 0.002 | -0.010 | 0.032 |
| rs78082503  | G | 0.79 | -0.015 | 0.003 | 0.076  | 0.036 |
| rs784256    | G | 0.19 | 0.019  | 0.003 | 0.199  | 0.039 |
| rs9372625   | G | 0.62 | -0.018 | 0.002 | 0.133  | 0.031 |
| rs9477970   | T | 0.81 | -0.016 | 0.003 | 0.092  | 0.039 |
| DBP         |   |      |        |       |        |       |
| rs10208088  | C | 0.42 | 0.013  | 0.002 | -0.044 | 0.018 |
| rs10754920  | C | 0.11 | 0.020  | 0.003 | -0.089 | 0.027 |
| rs113851275 | G | 0.89 | -0.021 | 0.004 | -0.046 | 0.028 |
| rs11749912  | A | 0.42 | 0.014  | 0.002 | 0.032  | 0.018 |
| rs12145677  | G | 0.70 | -0.017 | 0.002 | 0.011  | 0.019 |
| rs12603813  | T | 0.75 | 0.014  | 0.003 | -0.173 | 0.020 |



|             |   |      |        |       |        |       |
|-------------|---|------|--------|-------|--------|-------|
| rs12706626  | G | 0.62 | -0.013 | 0.002 | 0.009  | 0.018 |
| rs13262595  | A | 0.44 | -0.016 | 0.002 | 0.092  | 0.018 |
| rs136553    | C | 0.62 | -0.015 | 0.002 | 0.012  | 0.018 |
| rs1448355   | C | 0.38 | -0.015 | 0.002 | -0.056 | 0.018 |
| rs1469249   | G | 0.79 | 0.016  | 0.003 | -0.072 | 0.021 |
| rs162894    | T | 0.33 | 0.013  | 0.002 | 0.121  | 0.018 |
| rs166835    | C | 0.44 | 0.013  | 0.002 | -0.055 | 0.018 |
| rs198262    | C | 0.04 | 0.030  | 0.005 | 0.035  | 0.043 |
| rs2068625   | T | 0.30 | -0.016 | 0.002 | 0.002  | 0.019 |
| rs206965    | T | 0.21 | 0.016  | 0.003 | -0.020 | 0.021 |
| rs2220599   | C | 0.63 | -0.016 | 0.002 | 0.054  | 0.018 |
| rs2345941   | A | 0.55 | 0.015  | 0.002 | -0.034 | 0.017 |
| rs2734849   | A | 0.49 | -0.014 | 0.002 | 0.027  | 0.017 |
| rs2748985   | T | 0.45 | -0.015 | 0.002 | 0.120  | 0.018 |
| rs35933007  | G | 0.77 | -0.015 | 0.003 | 0.035  | 0.022 |
| rs3730399   | A | 0.93 | 0.025  | 0.004 | -0.058 | 0.035 |
| rs3944151   | A | 0.28 | 0.014  | 0.002 | 0.049  | 0.020 |
| rs4702      | G | 0.44 | 0.012  | 0.002 | -0.211 | 0.018 |
| rs4977839   | G | 0.58 | -0.020 | 0.002 | 0.002  | 0.018 |
| rs55772938  | A | 0.70 | -0.015 | 0.002 | 0.006  | 0.019 |
| rs6129084   | A | 0.36 | -0.014 | 0.002 | -0.016 | 0.018 |
| rs6498759   | T | 0.31 | 0.013  | 0.002 | -0.052 | 0.019 |
| rs66643547  | C | 0.65 | -0.015 | 0.002 | 0.110  | 0.019 |
| rs6744254   | C | 0.47 | -0.016 | 0.002 | 0.038  | 0.017 |
| rs6774533   | C | 0.29 | -0.015 | 0.002 | 0.030  | 0.019 |
| rs6857629   | G | 0.76 | 0.015  | 0.003 | -0.006 | 0.020 |
| rs6935828   | C | 0.45 | -0.012 | 0.002 | 0.035  | 0.017 |
| rs7020477   | A | 0.73 | 0.014  | 0.002 | 0.016  | 0.020 |
| rs7209653   | T | 0.70 | 0.016  | 0.002 | -0.036 | 0.019 |
| rs7288455   | A | 0.44 | 0.013  | 0.002 | -0.020 | 0.018 |
| rs73578186  | C | 0.68 | 0.015  | 0.002 | -0.004 | 0.018 |
| rs78082503  | G | 0.79 | -0.015 | 0.003 | 0.012  | 0.021 |
| rs784256    | G | 0.19 | 0.019  | 0.003 | 0.090  | 0.022 |
| rs9372625   | G | 0.62 | -0.018 | 0.002 | 0.060  | 0.018 |
| rs9477970   | T | 0.81 | -0.016 | 0.003 | 0.023  | 0.022 |
| PP          |   |      |        |       |        |       |
| rs10208088  | C | 0.42 | 0.013  | 0.002 | -0.043 | 0.021 |
| rs10754920  | C | 0.11 | 0.020  | 0.003 | -0.063 | 0.032 |
| rs113851275 | G | 0.89 | -0.021 | 0.004 | 0.069  | 0.034 |
| rs11749912  | A | 0.42 | 0.014  | 0.002 | 0.062  | 0.021 |
| rs12145677  | G | 0.70 | -0.017 | 0.002 | -0.052 | 0.022 |
| rs12603813  | T | 0.75 | 0.014  | 0.003 | -0.268 | 0.024 |
| rs12706626  | G | 0.62 | -0.013 | 0.002 | -0.025 | 0.021 |
| rs13262595  | A | 0.44 | -0.016 | 0.002 | 0.094  | 0.021 |
| rs136553    | C | 0.62 | -0.015 | 0.002 | 0.017  | 0.021 |

|            |   |      |        |       |        |       |
|------------|---|------|--------|-------|--------|-------|
| rs1448355  | C | 0.38 | -0.015 | 0.002 | -0.025 | 0.021 |
| rs1469249  | G | 0.79 | 0.016  | 0.003 | -0.096 | 0.025 |
| rs162894   | T | 0.33 | 0.013  | 0.002 | -0.068 | 0.022 |
| rs166835   | C | 0.44 | 0.013  | 0.002 | -0.047 | 0.021 |
| rs198262   | C | 0.04 | 0.030  | 0.005 | -0.058 | 0.051 |
| rs2068625  | T | 0.30 | -0.016 | 0.002 | 0.012  | 0.022 |
| rs206965   | T | 0.21 | 0.016  | 0.003 | -0.005 | 0.025 |
| rs2220599  | C | 0.63 | -0.016 | 0.002 | 0.065  | 0.021 |
| rs2345941  | A | 0.55 | 0.015  | 0.002 | 0.002  | 0.021 |
| rs2734849  | A | 0.49 | -0.014 | 0.002 | 0.037  | 0.021 |
| rs2748985  | T | 0.45 | -0.015 | 0.002 | 0.158  | 0.021 |
| rs35933007 | G | 0.77 | -0.015 | 0.003 | -0.036 | 0.026 |
| rs3730399  | A | 0.93 | 0.025  | 0.004 | 0.017  | 0.041 |
| rs3944151  | A | 0.28 | 0.014  | 0.002 | -0.042 | 0.023 |
| rs4702     | G | 0.44 | 0.012  | 0.002 | -0.223 | 0.021 |
| rs4977839  | G | 0.58 | -0.020 | 0.002 | 0.006  | 0.021 |
| rs55772938 | A | 0.70 | -0.015 | 0.002 | -0.013 | 0.023 |
| rs6129084  | A | 0.36 | -0.014 | 0.002 | 0.009  | 0.021 |
| rs6498759  | T | 0.31 | 0.013  | 0.002 | -0.004 | 0.022 |
| rs66643547 | C | 0.65 | -0.015 | 0.002 | 0.091  | 0.023 |
| rs6744254  | C | 0.47 | -0.016 | 0.002 | 0.011  | 0.021 |
| rs6774533  | C | 0.29 | -0.015 | 0.002 | 0.057  | 0.023 |
| rs6857629  | G | 0.76 | 0.015  | 0.003 | -0.001 | 0.024 |
| rs6935828  | C | 0.45 | -0.012 | 0.002 | -0.066 | 0.021 |
| rs7020477  | A | 0.73 | 0.014  | 0.002 | 0.043  | 0.024 |
| rs7209653  | T | 0.70 | 0.016  | 0.002 | -0.095 | 0.022 |
| rs7288455  | A | 0.44 | 0.013  | 0.002 | -0.027 | 0.021 |
| rs73578186 | C | 0.68 | 0.015  | 0.002 | -0.005 | 0.022 |
| rs78082503 | G | 0.79 | -0.015 | 0.003 | 0.053  | 0.025 |
| rs784256   | G | 0.19 | 0.019  | 0.003 | 0.116  | 0.026 |
| rs9372625  | G | 0.62 | -0.018 | 0.002 | 0.072  | 0.021 |
| rs9477970  | T | 0.81 | -0.016 | 0.003 | 0.068  | 0.026 |
| HDL-C      |   |      |        |       |        |       |
| rs12145677 | G | 0.70 | -0.017 | 0.002 | -0.004 | 0.005 |
| rs2734849  | A | 0.49 | -0.014 | 0.002 | 0.001  | 0.005 |
| rs1448355  | C | 0.38 | -0.015 | 0.002 | 0.002  | 0.005 |
| rs206965   | T | 0.21 | 0.016  | 0.003 | 0.003  | 0.006 |
| rs1319734  | A | 0.60 | 0.013  | 0.002 | 0.000  | 0.005 |
| rs198262   | C | 0.04 | 0.030  | 0.005 | 0.000  | 0.012 |
| rs166835   | C | 0.44 | 0.013  | 0.002 | 0.008  | 0.005 |
| rs4702     | G | 0.44 | 0.012  | 0.002 | -0.011 | 0.004 |
| rs6498759  | T | 0.31 | 0.013  | 0.002 | 0.003  | 0.005 |
| rs4073003  | A | 0.87 | 0.020  | 0.003 | -0.003 | 0.008 |
| rs7209653  | T | 0.70 | 0.016  | 0.002 | 0.005  | 0.005 |
| rs12603813 | T | 0.75 | 0.014  | 0.003 | 0.003  | 0.004 |

|            |   |      |        |       |        |       |
|------------|---|------|--------|-------|--------|-------|
| rs784256   | G | 0.19 | 0.019  | 0.003 | 0.004  | 0.006 |
| rs6744254  | C | 0.47 | -0.016 | 0.002 | 0.001  | 0.005 |
| rs2068625  | T | 0.30 | -0.016 | 0.002 | 0.001  | 0.005 |
| rs1469249  | G | 0.79 | 0.016  | 0.003 | 0.010  | 0.006 |
| rs162894   | T | 0.33 | 0.013  | 0.002 | -0.008 | 0.005 |
| rs17789218 | T | 0.76 | -0.015 | 0.003 | -0.004 | 0.004 |
| rs6935828  | C | 0.45 | -0.012 | 0.002 | -0.004 | 0.005 |
| rs9372625  | G | 0.62 | -0.018 | 0.002 | -0.008 | 0.005 |
| rs3944151  | A | 0.28 | 0.014  | 0.002 | 0.000  | 0.005 |
| rs2345941  | A | 0.55 | 0.015  | 0.002 | -0.001 | 0.005 |
| rs13262595 | A | 0.44 | -0.016 | 0.002 | -0.002 | 0.005 |
| rs9477970  | T | 0.81 | -0.016 | 0.003 | 0.010  | 0.006 |
| rs2220599  | C | 0.63 | -0.016 | 0.002 | -0.002 | 0.005 |

LDL-C

|            |   |      |        |       |        |       |
|------------|---|------|--------|-------|--------|-------|
| rs12145677 | G | 0.70 | -0.017 | 0.002 | 0.026  | 0.005 |
| rs2734849  | A | 0.49 | -0.014 | 0.002 | -0.001 | 0.005 |
| rs1448355  | C | 0.38 | -0.015 | 0.002 | -0.003 | 0.006 |
| rs206965   | T | 0.21 | 0.016  | 0.003 | 0.004  | 0.006 |
| rs1319734  | A | 0.60 | 0.013  | 0.002 | -0.001 | 0.005 |
| rs198262   | C | 0.04 | 0.030  | 0.005 | 0.018  | 0.013 |
| rs166835   | C | 0.44 | 0.013  | 0.002 | -0.005 | 0.005 |
| rs4702     | G | 0.44 | 0.012  | 0.002 | -0.001 | 0.004 |
| rs6498759  | T | 0.31 | 0.013  | 0.002 | -0.008 | 0.006 |
| rs4073003  | A | 0.87 | 0.020  | 0.003 | -0.001 | 0.009 |
| rs7209653  | T | 0.70 | 0.016  | 0.002 | -0.003 | 0.006 |
| rs12603813 | T | 0.75 | 0.014  | 0.003 | 0.005  | 0.004 |
| rs784256   | G | 0.19 | 0.019  | 0.003 | -0.005 | 0.007 |
| rs6744254  | C | 0.47 | -0.016 | 0.002 | 0.003  | 0.006 |
| rs2068625  | T | 0.30 | -0.016 | 0.002 | 0.007  | 0.006 |
| rs1469249  | G | 0.79 | 0.016  | 0.003 | 0.009  | 0.006 |
| rs162894   | T | 0.33 | 0.013  | 0.002 | -0.002 | 0.005 |
| rs17789218 | T | 0.76 | -0.015 | 0.003 | 0.024  | 0.004 |
| rs6935828  | C | 0.45 | -0.012 | 0.002 | -0.003 | 0.005 |
| rs9372625  | G | 0.62 | -0.018 | 0.002 | 0.017  | 0.005 |
| rs3944151  | A | 0.28 | 0.014  | 0.002 | 0.000  | 0.006 |
| rs2345941  | A | 0.55 | 0.015  | 0.002 | 0.007  | 0.005 |
| rs13262595 | A | 0.44 | -0.016 | 0.002 | 0.000  | 0.005 |
| rs9477970  | T | 0.81 | -0.016 | 0.003 | -0.007 | 0.007 |
| rs2220599  | C | 0.63 | -0.016 | 0.002 | 0.005  | 0.006 |

TC

|            |   |      |        |       |        |       |
|------------|---|------|--------|-------|--------|-------|
| rs12145677 | G | 0.70 | -0.017 | 0.002 | 0.018  | 0.005 |
| rs2734849  | A | 0.49 | -0.014 | 0.002 | 0.000  | 0.005 |
| rs1448355  | C | 0.38 | -0.015 | 0.002 | -0.004 | 0.006 |
| rs206965   | T | 0.21 | 0.016  | 0.003 | 0.006  | 0.006 |
| rs1319734  | A | 0.60 | 0.013  | 0.002 | -0.003 | 0.005 |

|            |   |      |        |       |        |       |
|------------|---|------|--------|-------|--------|-------|
| rs198262   | C | 0.04 | 0.030  | 0.005 | 0.012  | 0.013 |
| rs166835   | C | 0.44 | 0.013  | 0.002 | 0.001  | 0.005 |
| rs4702     | G | 0.44 | 0.012  | 0.002 | -0.002 | 0.004 |
| rs6498759  | T | 0.31 | 0.013  | 0.002 | -0.005 | 0.006 |
| rs4073003  | A | 0.87 | 0.020  | 0.003 | -0.001 | 0.009 |
| rs7209653  | T | 0.70 | 0.016  | 0.002 | -0.003 | 0.006 |
| rs12603813 | T | 0.75 | 0.014  | 0.003 | 0.004  | 0.004 |
| rs784256   | G | 0.19 | 0.019  | 0.003 | -0.007 | 0.007 |
| rs6744254  | C | 0.47 | -0.016 | 0.002 | 0.006  | 0.005 |
| rs2068625  | T | 0.30 | -0.016 | 0.002 | 0.009  | 0.006 |
| rs1469249  | G | 0.79 | 0.016  | 0.003 | 0.010  | 0.006 |
| rs162894   | T | 0.33 | 0.013  | 0.002 | -0.001 | 0.005 |
| rs17789218 | T | 0.76 | -0.015 | 0.003 | 0.020  | 0.004 |
| rs6935828  | C | 0.45 | -0.012 | 0.002 | -0.007 | 0.005 |
| rs9372625  | G | 0.62 | -0.018 | 0.002 | 0.013  | 0.005 |
| rs3944151  | A | 0.28 | 0.014  | 0.002 | 0.001  | 0.006 |
| rs2345941  | A | 0.55 | 0.015  | 0.002 | 0.006  | 0.005 |
| rs13262595 | A | 0.44 | -0.016 | 0.002 | -0.001 | 0.005 |
| rs9477970  | T | 0.81 | -0.016 | 0.003 | -0.007 | 0.007 |
| rs2220599  | C | 0.63 | -0.016 | 0.002 | 0.005  | 0.005 |
| TG         |   |      |        |       |        |       |
| rs12145677 | G | 0.70 | -0.017 | 0.002 | 0.003  | 0.004 |
| rs2734849  | A | 0.49 | -0.014 | 0.002 | 0.003  | 0.005 |
| rs1448355  | C | 0.38 | -0.015 | 0.002 | -0.005 | 0.005 |
| rs206965   | T | 0.21 | 0.016  | 0.003 | -0.008 | 0.006 |
| rs1319734  | A | 0.60 | 0.013  | 0.002 | 0.008  | 0.005 |
| rs198262   | C | 0.04 | 0.030  | 0.005 | -0.010 | 0.012 |
| rs166835   | C | 0.44 | 0.013  | 0.002 | -0.007 | 0.005 |
| rs4702     | G | 0.44 | 0.012  | 0.002 | 0.006  | 0.004 |
| rs6498759  | T | 0.31 | 0.013  | 0.002 | -0.002 | 0.005 |
| rs4073003  | A | 0.87 | 0.020  | 0.003 | 0.010  | 0.008 |
| rs7209653  | T | 0.70 | 0.016  | 0.002 | 0.000  | 0.005 |
| rs12603813 | T | 0.75 | 0.014  | 0.003 | -0.013 | 0.004 |
| rs784256   | G | 0.19 | 0.019  | 0.003 | -0.006 | 0.006 |
| rs6744254  | C | 0.47 | -0.016 | 0.002 | 0.001  | 0.005 |
| rs2068625  | T | 0.30 | -0.016 | 0.002 | 0.010  | 0.005 |
| rs1469249  | G | 0.79 | 0.016  | 0.003 | 0.003  | 0.006 |
| rs162894   | T | 0.33 | 0.013  | 0.002 | 0.013  | 0.005 |
| rs17789218 | T | 0.76 | -0.015 | 0.003 | 0.006  | 0.004 |
| rs6935828  | C | 0.45 | -0.012 | 0.002 | -0.007 | 0.005 |
| rs9372625  | G | 0.62 | -0.018 | 0.002 | 0.005  | 0.005 |
| rs3944151  | A | 0.28 | 0.014  | 0.002 | -0.003 | 0.005 |
| rs2345941  | A | 0.55 | 0.015  | 0.002 | 0.000  | 0.005 |
| rs13262595 | A | 0.44 | -0.016 | 0.002 | -0.005 | 0.005 |
| rs9477970  | T | 0.81 | -0.016 | 0.003 | -0.013 | 0.006 |

|            |   |      |        |       |        |       |
|------------|---|------|--------|-------|--------|-------|
| rs2220599  | C | 0.63 | -0.016 | 0.002 | 0.006  | 0.005 |
| HbA1c      |   |      |        |       |        |       |
| rs12145677 | G | 0.70 | -0.017 | 0.002 | 0.000  | 0.002 |
| rs10754920 | C | 0.11 | 0.020  | 0.003 | -0.004 | 0.006 |
| rs6744254  | C | 0.47 | -0.016 | 0.002 | 0.001  | 0.002 |
| rs2068625  | T | 0.30 | -0.016 | 0.002 | -0.001 | 0.002 |
| rs2220599  | C | 0.63 | -0.016 | 0.002 | 0.003  | 0.002 |
| rs1469249  | G | 0.79 | 0.016  | 0.003 | 0.001  | 0.002 |
| rs162894   | T | 0.33 | 0.013  | 0.002 | 0.002  | 0.002 |
| rs9477970  | T | 0.81 | -0.016 | 0.003 | -0.001 | 0.002 |
| rs9372625  | G | 0.62 | -0.018 | 0.002 | -0.001 | 0.002 |
| rs17789218 | T | 0.76 | -0.015 | 0.003 | 0.000  | 0.002 |
| rs6935828  | C | 0.45 | -0.012 | 0.002 | -0.005 | 0.002 |
| rs3944151  | A | 0.28 | 0.014  | 0.002 | 0.002  | 0.002 |
| rs2345941  | A | 0.55 | 0.015  | 0.002 | -0.002 | 0.002 |
| rs13262595 | A | 0.44 | -0.016 | 0.002 | -0.001 | 0.002 |
| rs2734849  | A | 0.49 | -0.014 | 0.002 | 0.000  | 0.002 |
| rs1448355  | C | 0.38 | -0.015 | 0.002 | -0.003 | 0.002 |
| rs1319734  | A | 0.60 | 0.013  | 0.002 | 0.001  | 0.002 |
| rs206965   | T | 0.21 | 0.016  | 0.003 | -0.003 | 0.002 |
| rs198262   | C | 0.04 | 0.030  | 0.005 | -0.005 | 0.004 |
| rs166835   | C | 0.44 | 0.013  | 0.002 | 0.002  | 0.002 |
| rs4702     | G | 0.44 | 0.012  | 0.002 | 0.000  | 0.002 |
| rs6498759  | T | 0.31 | 0.013  | 0.002 | -0.004 | 0.002 |
| rs4073003  | A | 0.87 | 0.020  | 0.003 | 0.001  | 0.003 |
| rs7209653  | T | 0.70 | 0.016  | 0.002 | 0.003  | 0.002 |
| rs12603813 | T | 0.75 | 0.014  | 0.003 | -0.001 | 0.002 |
| rs784256   | G | 0.19 | 0.019  | 0.003 | 0.000  | 0.002 |
| ISI        |   |      |        |       |        |       |
| rs12145677 | G | 0.70 | -0.017 | 0.002 | -0.100 | 0.084 |
| rs6744254  | C | 0.47 | -0.016 | 0.002 | -0.068 | 0.076 |
| rs2068625  | T | 0.30 | -0.016 | 0.002 | 0.078  | 0.082 |
| rs2220599  | C | 0.63 | -0.016 | 0.002 | -0.120 | 0.080 |
| rs1469249  | G | 0.79 | 0.016  | 0.003 | -0.035 | 0.093 |
| rs162894   | T | 0.33 | 0.013  | 0.002 | -0.130 | 0.080 |
| rs9477970  | T | 0.81 | -0.016 | 0.003 | -0.130 | 0.110 |
| rs9372625  | G | 0.62 | -0.018 | 0.002 | -0.052 | 0.080 |
| rs17789218 | T | 0.76 | -0.015 | 0.003 | -0.006 | 0.084 |
| rs6935828  | C | 0.45 | -0.012 | 0.002 | -0.011 | 0.075 |
| rs3944151  | A | 0.28 | 0.014  | 0.002 | -0.062 | 0.088 |
| rs2345941  | A | 0.55 | 0.015  | 0.002 | 0.034  | 0.072 |
| rs13262595 | A | 0.44 | -0.016 | 0.002 | 0.034  | 0.079 |
| rs2734849  | A | 0.49 | -0.014 | 0.002 | -0.110 | 0.075 |
| rs1448355  | C | 0.38 | -0.015 | 0.002 | -0.098 | 0.081 |
| rs1319734  | A | 0.60 | 0.013  | 0.002 | 0.009  | 0.077 |

|             |   |      |        |       |        |       |
|-------------|---|------|--------|-------|--------|-------|
| rs206965    | T | 0.21 | 0.016  | 0.003 | 0.100  | 0.094 |
| rs198262    | C | 0.04 | 0.030  | 0.005 | 0.140  | 0.220 |
| rs166835    | C | 0.44 | 0.013  | 0.002 | 0.140  | 0.074 |
| rs4702      | G | 0.44 | 0.012  | 0.002 | 0.025  | 0.087 |
| rs6498759   | T | 0.31 | 0.013  | 0.002 | 0.054  | 0.078 |
| rs4073003   | A | 0.87 | 0.020  | 0.003 | -0.080 | 0.110 |
| rs7209653   | T | 0.70 | 0.016  | 0.002 | -0.140 | 0.078 |
| rs12603813  | T | 0.75 | 0.014  | 0.003 | -0.084 | 0.089 |
| rs784256    | G | 0.19 | 0.019  | 0.003 | -0.031 | 0.098 |
| BMI         |   |      |        |       |        |       |
| rs10208088  | C | 0.42 | 0.013  | 0.002 | 0.002  | 0.002 |
| rs10754920  | C | 0.11 | 0.020  | 0.003 | 0.007  | 0.003 |
| rs113851275 | G | 0.89 | -0.021 | 0.004 | -0.002 | 0.003 |
| rs11749912  | A | 0.42 | 0.014  | 0.002 | 0.008  | 0.002 |
| rs12145677  | G | 0.70 | -0.017 | 0.002 | -0.011 | 0.002 |
| rs12603813  | T | 0.75 | 0.014  | 0.003 | -0.001 | 0.002 |
| rs12706626  | G | 0.62 | -0.013 | 0.002 | -0.002 | 0.002 |
| rs13262595  | A | 0.44 | -0.016 | 0.002 | -0.005 | 0.002 |
| rs136553    | C | 0.62 | -0.015 | 0.002 | -0.007 | 0.002 |
| rs1448355   | C | 0.38 | -0.015 | 0.002 | 0.001  | 0.002 |
| rs1469249   | G | 0.79 | 0.016  | 0.003 | -0.010 | 0.002 |
| rs162894    | T | 0.33 | 0.013  | 0.002 | 0.004  | 0.002 |
| rs166835    | C | 0.44 | 0.013  | 0.002 | 0.001  | 0.002 |
| rs198262    | C | 0.04 | 0.030  | 0.005 | -0.001 | 0.004 |
| rs2068625   | T | 0.30 | -0.016 | 0.002 | 0.007  | 0.002 |
| rs206965    | T | 0.21 | 0.016  | 0.003 | 0.003  | 0.002 |
| rs2220599   | C | 0.63 | -0.016 | 0.002 | 0.004  | 0.002 |
| rs2345941   | A | 0.55 | 0.015  | 0.002 | -0.002 | 0.002 |
| rs2734849   | A | 0.49 | -0.014 | 0.002 | 0.009  | 0.002 |
| rs2748985   | T | 0.45 | -0.015 | 0.002 | -0.014 | 0.002 |
| rs35933007  | G | 0.77 | -0.015 | 0.003 | 0.008  | 0.002 |
| rs3730399   | A | 0.93 | 0.025  | 0.004 | -0.011 | 0.004 |
| rs3944151   | A | 0.28 | 0.014  | 0.002 | 0.000  | 0.002 |
| rs4702      | G | 0.44 | 0.012  | 0.002 | 0.005  | 0.002 |
| rs4977839   | G | 0.58 | -0.020 | 0.002 | -0.010 | 0.002 |
| rs55772938  | A | 0.70 | -0.015 | 0.002 | -0.009 | 0.002 |
| rs6129084   | A | 0.36 | -0.014 | 0.002 | -0.005 | 0.002 |
| rs6498759   | T | 0.31 | 0.013  | 0.002 | -0.001 | 0.002 |
| rs66643547  | C | 0.65 | -0.015 | 0.002 | 0.002  | 0.002 |
| rs6744254   | C | 0.47 | -0.016 | 0.002 | -0.006 | 0.002 |
| rs6774533   | C | 0.29 | -0.015 | 0.002 | -0.012 | 0.002 |
| rs6857629   | G | 0.76 | 0.015  | 0.003 | -0.004 | 0.002 |
| rs6935828   | C | 0.45 | -0.012 | 0.002 | -0.001 | 0.002 |
| rs7020477   | A | 0.73 | 0.014  | 0.002 | 0.002  | 0.002 |
| rs7209653   | T | 0.70 | 0.016  | 0.002 | 0.003  | 0.002 |

|             |   |      |        |       |        |       |
|-------------|---|------|--------|-------|--------|-------|
| rs7288455   | A | 0.44 | 0.013  | 0.002 | -0.001 | 0.002 |
| rs73578186  | C | 0.68 | 0.015  | 0.002 | -0.005 | 0.002 |
| rs78082503  | G | 0.79 | -0.015 | 0.003 | -0.001 | 0.002 |
| rs784256    | G | 0.19 | 0.019  | 0.003 | -0.015 | 0.002 |
| rs9372625   | G | 0.62 | -0.018 | 0.002 | 0.015  | 0.002 |
| rs9477970   | T | 0.81 | -0.016 | 0.003 | -0.010 | 0.002 |
| WHR         |   |      |        |       |        |       |
| rs10208088  | C | 0.42 | 0.013  | 0.002 | 0.000  | 0.002 |
| rs10754920  | C | 0.11 | 0.020  | 0.003 | 0.001  | 0.003 |
| rs113851275 | G | 0.89 | -0.021 | 0.004 | 0.011  | 0.003 |
| rs11749912  | A | 0.42 | 0.014  | 0.002 | 0.003  | 0.002 |
| rs12145677  | G | 0.70 | -0.017 | 0.002 | -0.007 | 0.002 |
| rs12603813  | T | 0.75 | 0.014  | 0.003 | -0.005 | 0.002 |
| rs12706626  | G | 0.62 | -0.013 | 0.002 | -0.002 | 0.002 |
| rs13262595  | A | 0.44 | -0.016 | 0.002 | -0.003 | 0.002 |
| rs136553    | C | 0.62 | -0.015 | 0.002 | -0.003 | 0.002 |
| rs1448355   | C | 0.38 | -0.015 | 0.002 | 0.003  | 0.002 |
| rs1469249   | G | 0.79 | 0.016  | 0.003 | -0.004 | 0.002 |
| rs162894    | T | 0.33 | 0.013  | 0.002 | -0.002 | 0.002 |
| rs166835    | C | 0.44 | 0.013  | 0.002 | -0.001 | 0.002 |
| rs198262    | C | 0.04 | 0.030  | 0.005 | -0.005 | 0.005 |
| rs2068625   | T | 0.30 | -0.016 | 0.002 | -0.001 | 0.002 |
| rs206965    | T | 0.21 | 0.016  | 0.003 | 0.004  | 0.002 |
| rs2220599   | C | 0.63 | -0.016 | 0.002 | 0.004  | 0.002 |
| rs2345941   | A | 0.55 | 0.015  | 0.002 | -0.001 | 0.002 |
| rs2734849   | A | 0.49 | -0.014 | 0.002 | 0.011  | 0.002 |
| rs2748985   | T | 0.45 | -0.015 | 0.002 | -0.009 | 0.002 |
| rs35933007  | G | 0.77 | -0.015 | 0.003 | 0.002  | 0.002 |
| rs3730399   | A | 0.93 | 0.025  | 0.004 | -0.002 | 0.004 |
| rs3944151   | A | 0.28 | 0.014  | 0.002 | 0.008  | 0.002 |
| rs4702      | G | 0.44 | 0.012  | 0.002 | 0.007  | 0.002 |
| rs4977839   | G | 0.58 | -0.020 | 0.002 | -0.004 | 0.002 |
| rs55772938  | A | 0.70 | -0.015 | 0.002 | -0.011 | 0.002 |
| rs6129084   | A | 0.36 | -0.014 | 0.002 | -0.002 | 0.002 |
| rs6498759   | T | 0.31 | 0.013  | 0.002 | -0.003 | 0.002 |
| rs66643547  | C | 0.65 | -0.015 | 0.002 | 0.003  | 0.002 |
| rs6744254   | C | 0.47 | -0.016 | 0.002 | -0.003 | 0.002 |
| rs6774533   | C | 0.29 | -0.015 | 0.002 | -0.013 | 0.002 |
| rs6857629   | G | 0.76 | 0.015  | 0.003 | -0.004 | 0.002 |
| rs6935828   | C | 0.45 | -0.012 | 0.002 | -0.001 | 0.002 |
| rs7020477   | A | 0.73 | 0.014  | 0.002 | 0.000  | 0.002 |
| rs7209653   | T | 0.70 | 0.016  | 0.002 | 0.001  | 0.002 |
| rs7288455   | A | 0.44 | 0.013  | 0.002 | -0.007 | 0.002 |
| rs73578186  | C | 0.68 | 0.015  | 0.002 | -0.003 | 0.002 |
| rs78082503  | G | 0.79 | -0.015 | 0.003 | -0.003 | 0.002 |

|             |   |      |        |       |        |       |
|-------------|---|------|--------|-------|--------|-------|
| rs784256    | G | 0.19 | 0.019  | 0.003 | -0.013 | 0.002 |
| rs9372625   | G | 0.62 | -0.018 | 0.002 | 0.012  | 0.002 |
| rs9477970   | T | 0.81 | -0.016 | 0.003 | -0.007 | 0.002 |
| Smoking     |   |      |        |       |        |       |
| rs10208088  | C | 0.42 | 0.013  | 0.002 | -0.003 | 0.004 |
| rs10754920  | C | 0.11 | 0.020  | 0.003 | 0.000  | 0.006 |
| rs113851275 | G | 0.89 | -0.021 | 0.004 | -0.002 | 0.005 |
| rs11749912  | A | 0.42 | 0.014  | 0.002 | -0.001 | 0.004 |
| rs12145677  | G | 0.70 | -0.017 | 0.002 | 0.002  | 0.004 |
| rs12603813  | T | 0.75 | 0.014  | 0.003 | 0.009  | 0.004 |
| rs12706626  | G | 0.62 | -0.013 | 0.002 | -0.008 | 0.004 |
| rs13262595  | A | 0.44 | -0.016 | 0.002 | 0.005  | 0.004 |
| rs136553    | C | 0.62 | -0.015 | 0.002 | -0.008 | 0.004 |
| rs1448355   | C | 0.38 | -0.015 | 0.002 | 0.006  | 0.004 |
| rs1469249   | G | 0.79 | 0.016  | 0.003 | 0.002  | 0.005 |
| rs162894    | T | 0.33 | 0.013  | 0.002 | -0.007 | 0.004 |
| rs166835    | C | 0.44 | 0.013  | 0.002 | 0.004  | 0.004 |
| rs198262    | C | 0.04 | 0.030  | 0.005 | 0.007  | 0.009 |
| rs2068625   | T | 0.30 | -0.016 | 0.002 | -0.004 | 0.004 |
| rs206965    | T | 0.21 | 0.016  | 0.003 | 0.002  | 0.005 |
| rs2220599   | C | 0.63 | -0.016 | 0.002 | -0.004 | 0.004 |
| rs2345941   | A | 0.55 | 0.015  | 0.002 | 0.003  | 0.004 |
| rs2734849   | A | 0.49 | -0.014 | 0.002 | -0.010 | 0.004 |
| rs2748985   | T | 0.45 | -0.015 | 0.002 | 0.008  | 0.004 |
| rs35933007  | G | 0.77 | -0.015 | 0.003 | 0.006  | 0.005 |
| rs3730399   | A | 0.93 | 0.025  | 0.004 | -0.011 | 0.007 |
| rs3944151   | A | 0.28 | 0.014  | 0.002 | -0.006 | 0.004 |
| rs4702      | G | 0.44 | 0.012  | 0.002 | -0.003 | 0.004 |
| rs4977839   | G | 0.58 | -0.020 | 0.002 | 0.000  | 0.004 |
| rs55772938  | A | 0.70 | -0.015 | 0.002 | 0.002  | 0.004 |
| rs6129084   | A | 0.36 | -0.014 | 0.002 | -0.002 | 0.004 |
| rs6498759   | T | 0.31 | 0.013  | 0.002 | -0.005 | 0.005 |
| rs66643547  | C | 0.65 | -0.015 | 0.002 | 0.001  | 0.004 |
| rs6744254   | C | 0.47 | -0.016 | 0.002 | 0.003  | 0.004 |
| rs6774533   | C | 0.29 | -0.015 | 0.002 | 0.006  | 0.004 |
| rs6857629   | G | 0.76 | 0.015  | 0.003 | -0.003 | 0.004 |
| rs6935828   | C | 0.45 | -0.012 | 0.002 | -0.003 | 0.004 |
| rs7020477   | A | 0.73 | 0.014  | 0.002 | 0.000  | 0.004 |
| rs7209653   | T | 0.70 | 0.016  | 0.002 | -0.002 | 0.004 |
| rs7288455   | A | 0.44 | 0.013  | 0.002 | 0.009  | 0.004 |
| rs73578186  | C | 0.68 | 0.015  | 0.002 | -0.003 | 0.004 |
| rs78082503  | G | 0.79 | -0.015 | 0.003 | 0.001  | 0.005 |
| rs784256    | G | 0.19 | 0.019  | 0.003 | 0.004  | 0.005 |
| rs9372625   | G | 0.62 | -0.018 | 0.002 | -0.002 | 0.004 |
| rs9477970   | T | 0.81 | -0.016 | 0.003 | 0.002  | 0.005 |



|                   |   |      |        |       |        |       |
|-------------------|---|------|--------|-------|--------|-------|
| Drinking          |   |      |        |       |        |       |
| rs10208088        | C | 0.42 | 0.013  | 0.002 | -0.001 | 0.003 |
| rs10754920        | C | 0.11 | 0.020  | 0.003 | 0.004  | 0.004 |
| rs113851275       | G | 0.89 | -0.021 | 0.004 | 0.000  | 0.005 |
| rs11749912        | A | 0.42 | 0.014  | 0.002 | 0.003  | 0.003 |
| rs12145677        | G | 0.70 | -0.017 | 0.002 | 0.001  | 0.003 |
| rs12603813        | T | 0.75 | 0.014  | 0.003 | -0.004 | 0.003 |
| rs12706626        | G | 0.62 | -0.013 | 0.002 | -0.002 | 0.003 |
| rs13262595        | A | 0.44 | -0.016 | 0.002 | 0.005  | 0.003 |
| rs136553          | C | 0.62 | -0.015 | 0.002 | -0.005 | 0.003 |
| rs1448355         | C | 0.38 | -0.015 | 0.002 | 0.003  | 0.003 |
| rs1469249         | G | 0.79 | 0.016  | 0.003 | -0.003 | 0.004 |
| rs162894          | T | 0.33 | 0.013  | 0.002 | -0.002 | 0.003 |
| rs166835          | C | 0.44 | 0.013  | 0.002 | -0.008 | 0.003 |
| rs198262          | C | 0.04 | 0.030  | 0.005 | 0.002  | 0.007 |
| rs2068625         | T | 0.30 | -0.016 | 0.002 | -0.003 | 0.003 |
| rs206965          | T | 0.21 | 0.016  | 0.003 | 0.001  | 0.004 |
| rs2220599         | C | 0.63 | -0.016 | 0.002 | 0.000  | 0.003 |
| rs2345941         | A | 0.55 | 0.015  | 0.002 | -0.004 | 0.003 |
| rs2734849         | A | 0.49 | -0.014 | 0.002 | -0.010 | 0.003 |
| rs2748985         | T | 0.45 | -0.015 | 0.002 | -0.006 | 0.003 |
| rs35933007        | G | 0.77 | -0.015 | 0.003 | -0.011 | 0.004 |
| rs3730399         | A | 0.93 | 0.025  | 0.004 | 0.002  | 0.006 |
| rs3944151         | A | 0.28 | 0.014  | 0.002 | -0.003 | 0.003 |
| rs4702            | G | 0.44 | 0.012  | 0.002 | -0.004 | 0.003 |
| rs4977839         | G | 0.58 | -0.020 | 0.002 | 0.001  | 0.003 |
| rs55772938        | A | 0.70 | -0.015 | 0.002 | 0.006  | 0.003 |
| rs6129084         | A | 0.36 | -0.014 | 0.002 | 0.008  | 0.003 |
| rs6498759         | T | 0.31 | 0.013  | 0.002 | 0.000  | 0.003 |
| rs66643547        | C | 0.65 | -0.015 | 0.002 | 0.002  | 0.003 |
| rs6744254         | C | 0.47 | -0.016 | 0.002 | 0.001  | 0.003 |
| rs6774533         | C | 0.29 | -0.015 | 0.002 | -0.003 | 0.003 |
| rs6857629         | G | 0.76 | 0.015  | 0.003 | -0.002 | 0.003 |
| rs6935828         | C | 0.45 | -0.012 | 0.002 | -0.005 | 0.003 |
| rs7020477         | A | 0.73 | 0.014  | 0.002 | 0.002  | 0.003 |
| rs7209653         | T | 0.70 | 0.016  | 0.002 | -0.001 | 0.003 |
| rs7288455         | A | 0.44 | 0.013  | 0.002 | -0.001 | 0.003 |
| rs73578186        | C | 0.68 | 0.015  | 0.002 | 0.000  | 0.003 |
| rs78082503        | G | 0.79 | -0.015 | 0.003 | -0.004 | 0.004 |
| rs784256          | G | 0.19 | 0.019  | 0.003 | -0.011 | 0.004 |
| rs9372625         | G | 0.62 | -0.018 | 0.002 | 0.010  | 0.003 |
| rs9477970         | T | 0.81 | -0.016 | 0.003 | 0.001  | 0.004 |
| Physical activity |   |      |        |       |        |       |
| rs10208088        | C | 0.42 | 0.013  | 0.002 | -0.012 | 0.004 |
| rs10754920        | C | 0.11 | 0.020  | 0.003 | -0.011 | 0.007 |

|             |   |      |        |       |        |       |
|-------------|---|------|--------|-------|--------|-------|
| rs113851275 | G | 0.89 | -0.021 | 0.004 | 0.004  | 0.007 |
| rs11708955  | T | 0.69 | -0.016 | 0.002 | 0.010  | 0.005 |
| rs11749912  | A | 0.42 | 0.014  | 0.002 | -0.015 | 0.004 |
| rs12145677  | G | 0.70 | -0.017 | 0.002 | 0.003  | 0.005 |
| rs12603813  | T | 0.75 | 0.014  | 0.003 | 0.002  | 0.005 |
| rs12706626  | G | 0.62 | -0.013 | 0.002 | 0.006  | 0.004 |
| rs13262595  | A | 0.44 | -0.016 | 0.002 | 0.001  | 0.004 |
| rs136553    | C | 0.62 | -0.015 | 0.002 | 0.009  | 0.004 |
| rs1448355   | C | 0.38 | -0.015 | 0.002 | -0.003 | 0.004 |
| rs1469249   | G | 0.79 | 0.016  | 0.003 | -0.005 | 0.005 |
| rs162894    | T | 0.33 | 0.013  | 0.002 | 0.006  | 0.005 |
| rs166835    | C | 0.44 | 0.013  | 0.002 | -0.003 | 0.004 |
| rs198262    | C | 0.04 | 0.030  | 0.005 | -0.013 | 0.010 |
| rs2068625   | T | 0.30 | -0.016 | 0.002 | 0.009  | 0.005 |
| rs206965    | T | 0.21 | 0.016  | 0.003 | -0.002 | 0.005 |
| rs2220599   | C | 0.63 | -0.016 | 0.002 | 0.003  | 0.004 |
| rs2345941   | A | 0.55 | 0.015  | 0.002 | -0.018 | 0.004 |
| rs2734849   | A | 0.49 | -0.014 | 0.002 | 0.005  | 0.004 |
| rs2748985   | T | 0.45 | -0.015 | 0.002 | -0.001 | 0.004 |
| rs35933007  | G | 0.77 | -0.015 | 0.003 | 0.017  | 0.005 |
| rs3730399   | A | 0.93 | 0.025  | 0.004 | -0.009 | 0.009 |
| rs3944151   | A | 0.28 | 0.014  | 0.002 | -0.009 | 0.005 |
| rs4592851   | G | 0.75 | -0.014 | 0.003 | 0.005  | 0.005 |
| rs4702      | G | 0.44 | 0.012  | 0.002 | -0.010 | 0.004 |
| rs4977839   | G | 0.58 | -0.020 | 0.002 | 0.003  | 0.004 |
| rs55772938  | A | 0.70 | -0.015 | 0.002 | 0.000  | 0.005 |
| rs6129084   | A | 0.36 | -0.014 | 0.002 | 0.000  | 0.004 |
| rs6498759   | T | 0.31 | 0.013  | 0.002 | -0.006 | 0.005 |
| rs66643547  | C | 0.65 | -0.015 | 0.002 | -0.006 | 0.004 |
| rs6744254   | C | 0.47 | -0.016 | 0.002 | -0.004 | 0.004 |
| rs6774533   | C | 0.29 | -0.015 | 0.002 | 0.010  | 0.005 |
| rs6857629   | G | 0.76 | 0.015  | 0.003 | -0.007 | 0.005 |
| rs6935828   | C | 0.45 | -0.012 | 0.002 | 0.000  | 0.004 |
| rs7020477   | A | 0.73 | 0.014  | 0.002 | 0.010  | 0.005 |
| rs7209653   | T | 0.70 | 0.016  | 0.002 | 0.003  | 0.005 |
| rs7288455   | A | 0.44 | 0.013  | 0.002 | 0.001  | 0.004 |
| rs73578186  | C | 0.68 | 0.015  | 0.002 | 0.004  | 0.005 |
| rs78082503  | G | 0.79 | -0.015 | 0.003 | -0.001 | 0.005 |
| rs784256    | G | 0.19 | 0.019  | 0.003 | 0.014  | 0.005 |
| rs9372625   | G | 0.62 | -0.018 | 0.002 | -0.004 | 0.004 |
| rs9477970   | T | 0.81 | -0.016 | 0.003 | -0.011 | 0.005 |

**Supplementary Table 21. Summary data for the genetic association between driving and outcomes.**

| SNP                  | EA | EAF  | GX     | GX_SE | GY     | GY_SE |
|----------------------|----|------|--------|-------|--------|-------|
| <b>AS</b>            |    |      |        |       |        |       |
| rs1198575            | T  | 0.19 | 0.019  | 0.003 | -0.015 | 0.012 |
| rs4765541            | T  | 0.66 | 0.014  | 0.002 | 0.012  | 0.010 |
| rs9840902            | G  | 0.78 | -0.015 | 0.003 | 0.001  | 0.013 |
| rs10186876           | A  | 0.36 | 0.014  | 0.002 | 0.001  | 0.010 |
| rs6012558            | G  | 0.58 | 0.014  | 0.002 | 0.003  | 0.009 |
| <b>AIS</b>           |    |      |        |       |        |       |
| rs1198575            | T  | 0.19 | 0.019  | 0.003 | -0.016 | 0.013 |
| rs4765541            | T  | 0.66 | 0.014  | 0.002 | 0.016  | 0.010 |
| rs9840902            | G  | 0.78 | -0.015 | 0.003 | 0.003  | 0.014 |
| rs10186876           | A  | 0.36 | 0.014  | 0.002 | 0.006  | 0.011 |
| rs6012558            | G  | 0.58 | 0.014  | 0.002 | 0.008  | 0.011 |
| <b>CES</b>           |    |      |        |       |        |       |
| rs1198575            | T  | 0.19 | 0.019  | 0.003 | -0.021 | 0.025 |
| rs4765541            | T  | 0.66 | 0.014  | 0.002 | 0.022  | 0.020 |
| rs9840902            | G  | 0.78 | -0.015 | 0.003 | -0.017 | 0.026 |
| rs10186876           | A  | 0.36 | 0.014  | 0.002 | 0.005  | 0.020 |
| rs6012558            | G  | 0.58 | 0.014  | 0.002 | 0.016  | 0.020 |
| <b>LAS</b>           |    |      |        |       |        |       |
| rs1198575            | T  | 0.19 | 0.019  | 0.003 | -0.047 | 0.033 |
| rs4765541            | T  | 0.66 | 0.014  | 0.002 | 0.055  | 0.026 |
| rs9840902            | G  | 0.78 | -0.015 | 0.003 | 0.024  | 0.034 |
| rs10186876           | A  | 0.36 | 0.014  | 0.002 | 0.041  | 0.027 |
| rs6012558            | G  | 0.58 | 0.014  | 0.002 | 0.021  | 0.025 |
| <b>SVS</b>           |    |      |        |       |        |       |
| rs1198575            | T  | 0.19 | 0.019  | 0.003 | -0.013 | 0.030 |
| rs4765541            | T  | 0.66 | 0.014  | 0.002 | 0.054  | 0.025 |
| rs9840902            | G  | 0.78 | -0.015 | 0.003 | 0.032  | 0.032 |
| rs10186876           | A  | 0.36 | 0.014  | 0.002 | -0.042 | 0.024 |
| rs6012558            | G  | 0.58 | 0.014  | 0.002 | 0.004  | 0.024 |
| <b>ICH</b>           |    |      |        |       |        |       |
| rs10186876           | A  | 0.36 | 0.014  | 0.002 | -0.035 | 0.054 |
| rs4765541            | T  | 0.66 | 0.014  | 0.002 | -0.003 | 0.054 |
| rs9840902            | A  | 0.22 | 0.015  | 0.003 | 0.014  | 0.065 |
| <b>non-lobar ICH</b> |    |      |        |       |        |       |
| rs10186876           | A  | 0.36 | 0.014  | 0.002 | -0.091 | 0.065 |
| rs4765541            | T  | 0.66 | 0.014  | 0.002 | 0.065  | 0.064 |
| rs9840902            | A  | 0.22 | 0.015  | 0.003 | 0.038  | 0.077 |
| <b>lobar ICH</b>     |    |      |        |       |        |       |
| rs4765541            | T  | 0.66 | 0.014  | 0.002 | -0.074 | 0.070 |
| rs10186876           | A  | 0.36 | 0.014  | 0.002 | 0.026  | 0.070 |
| rs9840902            | A  | 0.22 | 0.015  | 0.003 | -0.055 | 0.087 |

| WMH        |   |      |        |       |        |       |
|------------|---|------|--------|-------|--------|-------|
| rs1198575  | T | 0.19 | 0.019  | 0.003 | 0.012  | 0.016 |
| rs10186876 | A | 0.36 | 0.014  | 0.002 | -0.010 | 0.013 |
| rs6012558  | G | 0.58 | 0.014  | 0.002 | 0.008  | 0.013 |
| rs4765541  | T | 0.66 | 0.014  | 0.002 | 0.008  | 0.013 |
| AD         |   |      |        |       |        |       |
| rs1198575  | T | 0.19 | 0.019  | 0.003 | 0.015  | 0.019 |
| rs10186876 | A | 0.36 | 0.014  | 0.002 | -0.010 | 0.015 |
| rs9840902  | G | 0.78 | -0.015 | 0.003 | -0.006 | 0.019 |
| rs4765541  | T | 0.66 | 0.014  | 0.002 | -0.007 | 0.015 |
| rs6012558  | G | 0.58 | 0.014  | 0.002 | 0.015  | 0.015 |
| PD         |   |      |        |       |        |       |
| rs1198575  | T | 0.19 | 0.019  | 0.003 | -0.016 | 0.028 |
| rs10186876 | A | 0.36 | 0.014  | 0.002 | -0.013 | 0.023 |
| rs4765541  | T | 0.66 | 0.014  | 0.002 | -0.051 | 0.018 |
| rs6012558  | G | 0.58 | 0.014  | 0.002 | 0.056  | 0.020 |
| MS         |   |      |        |       |        |       |
| rs1198575  | T | 0.19 | 0.019  | 0.003 | -0.017 | 0.086 |
| rs10186876 | A | 0.36 | 0.014  | 0.002 | -0.025 | 0.023 |
| rs4765541  | T | 0.66 | 0.014  | 0.002 | -0.010 | 0.098 |
| rs6012558  | G | 0.58 | 0.014  | 0.002 | 0.010  | 0.052 |
| CP         |   |      |        |       |        |       |
| rs6012558  | G | 0.58 | 0.014  | 0.002 | -0.024 | 0.003 |
| rs4765541  | T | 0.66 | 0.014  | 0.002 | -0.009 | 0.003 |
| rs10186876 | A | 0.36 | 0.014  | 0.002 | -0.009 | 0.003 |
| rs1198575  | T | 0.19 | 0.019  | 0.003 | -0.005 | 0.004 |
| SBP        |   |      |        |       |        |       |
| rs4765541  | T | 0.66 | 0.014  | 0.002 | 0.099  | 0.032 |
| rs1198575  | T | 0.19 | 0.019  | 0.003 | -0.086 | 0.039 |
| rs6012558  | G | 0.58 | 0.014  | 0.002 | 0.116  | 0.031 |
| rs10186876 | A | 0.36 | 0.014  | 0.002 | -0.072 | 0.032 |
| DBP        |   |      |        |       |        |       |
| rs4765541  | T | 0.66 | 0.014  | 0.002 | 0.027  | 0.018 |
| rs1198575  | T | 0.19 | 0.019  | 0.003 | -0.030 | 0.022 |
| rs6012558  | G | 0.58 | 0.014  | 0.002 | 0.077  | 0.018 |
| rs10186876 | A | 0.36 | 0.014  | 0.002 | -0.044 | 0.018 |
| PP         |   |      |        |       |        |       |
| rs4765541  | T | 0.66 | 0.014  | 0.002 | 0.072  | 0.022 |
| rs1198575  | T | 0.19 | 0.019  | 0.003 | -0.060 | 0.026 |
| rs6012558  | G | 0.58 | 0.014  | 0.002 | 0.045  | 0.021 |
| rs10186876 | A | 0.36 | 0.014  | 0.002 | -0.023 | 0.021 |
| HDL-C      |   |      |        |       |        |       |
| rs1198575  | T | 0.19 | 0.019  | 0.003 | -0.010 | 0.007 |
| rs6012558  | G | 0.58 | 0.014  | 0.002 | 0.003  | 0.004 |
| rs9840902  | G | 0.78 | -0.015 | 0.003 | 0.004  | 0.006 |

|                   |   |      |        |       |        |       |
|-------------------|---|------|--------|-------|--------|-------|
| LDL-C             |   |      |        |       |        |       |
| rs1198575         | T | 0.19 | 0.019  | 0.003 | 0.016  | 0.007 |
| rs6012558         | G | 0.58 | 0.014  | 0.002 | 0.000  | 0.004 |
| rs9840902         | G | 0.78 | -0.015 | 0.003 | -0.005 | 0.006 |
| TC                |   |      |        |       |        |       |
| rs1198575         | T | 0.19 | 0.019  | 0.003 | 0.013  | 0.007 |
| rs6012558         | G | 0.58 | 0.014  | 0.002 | 0.001  | 0.004 |
| rs9840902         | G | 0.78 | -0.015 | 0.003 | -0.004 | 0.006 |
| TG                |   |      |        |       |        |       |
| rs1198575         | T | 0.19 | 0.019  | 0.003 | 0.014  | 0.006 |
| rs6012558         | G | 0.58 | 0.014  | 0.002 | 0.004  | 0.003 |
| rs9840902         | G | 0.78 | -0.015 | 0.003 | 0.006  | 0.006 |
| HbA1c             |   |      |        |       |        |       |
| rs1198575         | T | 0.19 | 0.019  | 0.003 | -0.004 | 0.003 |
| rs6012558         | G | 0.58 | 0.014  | 0.002 | 0.001  | 0.002 |
| rs9840902         | G | 0.78 | -0.015 | 0.003 | -0.003 | 0.002 |
| ISI               |   |      |        |       |        |       |
| rs1198575         | T | 0.19 | 0.019  | 0.003 | 0.031  | 0.099 |
| rs6012558         | G | 0.58 | 0.014  | 0.002 | 0.024  | 0.078 |
| rs9840902         | G | 0.78 | -0.015 | 0.003 | 0.079  | 0.086 |
| BMI               |   |      |        |       |        |       |
| rs1198575         | T | 0.19 | 0.019  | 0.003 | 0.011  | 0.002 |
| rs10186876        | A | 0.36 | 0.014  | 0.002 | -0.002 | 0.002 |
| rs4765541         | T | 0.66 | 0.014  | 0.002 | -0.011 | 0.002 |
| rs6012558         | G | 0.58 | 0.014  | 0.002 | 0.005  | 0.002 |
| WHR               |   |      |        |       |        |       |
| rs1198575         | T | 0.19 | 0.019  | 0.003 | 0.014  | 0.002 |
| rs10186876        | A | 0.36 | 0.014  | 0.002 | -0.006 | 0.002 |
| rs4765541         | T | 0.66 | 0.014  | 0.002 | 0.029  | 0.002 |
| rs6012558         | G | 0.58 | 0.014  | 0.002 | 0.002  | 0.002 |
| Smoking           |   |      |        |       |        |       |
| rs1198575         | T | 0.19 | 0.019  | 0.003 | -0.006 | 0.005 |
| rs10186876        | A | 0.36 | 0.014  | 0.002 | 0.003  | 0.004 |
| rs4765541         | T | 0.66 | 0.014  | 0.002 | -0.006 | 0.004 |
| rs6012558         | G | 0.58 | 0.014  | 0.002 | -0.004 | 0.004 |
| Drinking          |   |      |        |       |        |       |
| rs1198575         | T | 0.19 | 0.019  | 0.003 | -0.003 | 0.004 |
| rs10186876        | A | 0.36 | 0.014  | 0.002 | -0.004 | 0.003 |
| rs4765541         | T | 0.66 | 0.014  | 0.002 | 0.002  | 0.003 |
| rs6012558         | G | 0.58 | 0.014  | 0.002 | 0.001  | 0.003 |
| Physical activity |   |      |        |       |        |       |
| rs1198575         | T | 0.19 | 0.019  | 0.003 | 0.009  | 0.005 |
| rs10186876        | A | 0.36 | 0.014  | 0.002 | 0.010  | 0.004 |
| rs9840902         | G | 0.78 | -0.015 | 0.003 | -0.014 | 0.005 |
| rs4765541         | T | 0.66 | 0.014  | 0.002 | 0.004  | 0.005 |

|           |   |      |       |       |       |       |
|-----------|---|------|-------|-------|-------|-------|
| rs6012558 | G | 0.58 | 0.014 | 0.002 | 0.007 | 0.004 |
|-----------|---|------|-------|-------|-------|-------|
